# Supplementary material for: Quantitative Transcriptomic and Proteomic Analysis of Fruit Development and Ripening in Watermelon (Citrullus lanatus)
Source: Front Plant Sci. 2022 Mar 22;13:818392. doi: 10.3389/fpls.2022.818392 (PMC8980866; doi:10.3389/fpls.2022.818392)
Supplement: Supplementary file 8 [file Table_7.XLSX]

## Sheet: Up
KEGG pathway	Mapping	Background	All Mapping	All Background	Fold Enrichment	Fisher's exact test p value	-log10(p value)	Related proteins
map00195 Photosynthesis	8	28	90	2368	7.52	5.30991e-06	5.27	Cla97C02G027850.1 Cla97C05G086450.1 Cla97C05G091900.1 Cla97C07G137540.1 Cla97C08G148420.1 Cla97C09G178700.1 Cla97C10G185280.1 Cla97C08G152480.1
map04141 Protein processing in endoplasmic reticulum	14	125	90	2368	2.95	0.000184317	3.73	Cla97C01G008920.1 Cla97C02G033390.1 Cla97C03G051930.1 Cla97C03G051940.1 Cla97C04G071950.1 Cla97C05G094650.1 Cla97C05G099440.1 Cla97C05G108440.1 Cla97C07G132190.1 Cla97C08G145950.1 Cla97C10G187290.1 Cla97C11G217390.1 Cla97C04G074210.1 Cla97C07G132310.1
map00710 Carbon fixation in photosynthetic organisms	8	54	90	2368	3.9	0.000787657	3.1	Cla97C02G032410.1 Cla97C05G094190.1 Cla97C05G103110.1 Cla97C05G104530.1 Cla97C07G132400.1 Cla97C10G185800.1 Cla97C11G210620.1 Cla97C07G130520.1
map00071 Fatty acid degradation	4	31	90	2368	3.39	0.0280032	1.55	Cla97C02G036270.1 Cla97C05G084200.1 Cla97C05G086550.1 Cla97C06G113970.1

## Sheet: Up Pathway2Protein
KEGG pathway	Fisher's exact test p value	Fold Enrichment	Protein accession	Protein description	Gene name	26DAP/18DAP Ratio	26DAP/18DAP P value	Regulated Type	MW [kDa]	10DAP_1	KEGG KO No.	10DAP_2	10DAP_3	18DAP_1	18DAP_2	18DAP_3	26DAP_1	26DAP_2	26DAP_3	34DAP_1	34DAP_2	34DAP_3
map00040 Pentose and glucuronate interconversions	0.127927	2.39	Cla97C04G074560.1	aldo-keto reductase family 4 member C9-like	--	1.504	7.13e-05	Up	35.3	0.596	K00002	0.554	0.521	0.826	0.808	0.836	1.268	1.185	1.263	1.406	1.45	1.383
map00040 Pentose and glucuronate interconversions	0.127927	2.39	Cla97C05G089700.1	Alcohol dehydrogenase, putative	--	1.376	2.33e-05	Up	39.2	0.569	K00008	0.512	0.572	0.994	0.992	1.004	1.406	1.368	1.341	1.062	1.074	1.059
map00040 Pentose and glucuronate interconversions	0.127927	2.39	Cla97C09G176880.1	polygalacturonase-like	--	1.377	0.0279165	Up	37.8	0.675	K01184		0.793	0.763		0.716	1.063		0.973	1.499		1.518
map00053 Ascorbate and aldarate metabolism	0.31686	1.75	Cla97C02G030990.1	Ascorbate peroxidase	--	1.324	2.64e-05	Up	31.5	0.685	K00434	0.716	0.731	0.974	0.943	0.959	1.25	1.289	1.268	1.034	1.02	1.012
map00053 Ascorbate and aldarate metabolism	0.31686	1.75	Cla97C02G042380.1	GDP-mannose 3,5-epimerase 2	--	1.373	2.57e-06	Up	44.2	0.628	K10046	0.694	0.619	0.928	0.931	0.934	1.296	1.261	1.278	1.178	1.132	1.185
map00071 Fatty acid degradation	0.0280032	3.39	Cla97C02G036270.1	Acyl-coenzyme A oxidase	--	1.412	4.36e-05	Up	76.5	0.534	K00232	0.451	0.503	0.83	0.824	0.86	1.183	1.208	1.158	1.467	1.49	1.495
map00071 Fatty acid degradation	0.0280032	3.39	Cla97C05G084200.1	3-ketoacyl-CoA thiolase 2, peroxisomal	--	1.893	8.3e-07	Up	48.4	0.456	K07513	0.405	0.425	0.708	0.687	0.701	1.339	1.328	1.301	1.489	1.518	1.577
map00071 Fatty acid degradation	0.0280032	3.39	Cla97C05G086550.1	Long chain acyl-CoA synthetase 7	--	1.311	4.04e-06	Up	76.3	0.66	K01897	0.561	0.545	0.909	0.902	0.902	1.171	1.201	1.184	1.341	1.323	1.319
map00071 Fatty acid degradation	0.0280032	3.39	Cla97C06G113970.1	Enoyl-CoA hydratase	--	1.437	0.000220076	Up	28.7	0.605	K01692	0.532	0.679	0.901	0.875	0.933	1.293	1.348	1.251	1.219	1.233	1.146
map00195 Photosynthesis	5.30991e-06	7.52	Cla97C02G027850.1	Cytochrome b6-f complex iron-sulfur subunit	--	1.301	0.0034574	Up	24.2	1.566	K02636	1.535	1.559	0.79	0.82	0.732	1.008	0.973	1.065	0.634	0.686	0.551
map00195 Photosynthesis	5.30991e-06	7.52	Cla97C05G086450.1	Photosystem I reaction center subunit II	--	1.679	0.0251393	Up	22.8	0.601	K02692	1.12	1.023	0.53	0.835	0.753	1.336	1.067	1.154	1.533	0.977	1.071
map00195 Photosynthesis	5.30991e-06	7.52	Cla97C05G091900.1	Ferredoxin	--	1.597	0.000137507	Up	15.7	0.372	K02639	0.344	0.412	0.845	0.92	0.903	1.477	1.4	1.384	1.306	1.336	1.301
map00195 Photosynthesis	5.30991e-06	7.52	Cla97C07G137540.1	oxygen-evolving enhancer protein 2, chloroplastic	--	1.558	0.0379441	Up	28.3	1.145	K02717	1.099		0.725	0.849		1.278	1.175		0.851	0.877
map00195 Photosynthesis	5.30991e-06	7.52	Cla97C08G148420.1	photosystem II 22 kDa protein, chloroplastic	--	1.346	0.00634154	Up	28.8	1.08	K03542	0.794	0.933	0.785	0.771	0.815	0.998	1.181	1.013	1.137	1.253	1.239
map00195 Photosynthesis	5.30991e-06	7.52	Cla97C09G178700.1	Photosystem I P700 chlorophyll a apoprotein A1	--	1.486	0.00162361	Up	17.6	1.232	K02689	1.256		0.729	0.714		1.059	1.085		0.98	0.945
map00195 Photosynthesis	5.30991e-06	7.52	Cla97C10G185280.1	Ferredoxin--NADP reductase	--	1.673	1.73e-05	Up	40.3	1.136	K02641	1.046	1.085	0.812	0.779	0.809	1.325	1.308	1.382	0.761	0.789	0.73
map00195 Photosynthesis	5.30991e-06	7.52	Cla97C08G152480.1	ATP synthase subunit b, chloroplastic	--	1.487	0.0311468	Up	8.8		K02109	1.933	1.63		0.624	0.72		0.99	1.008		0.453	0.642
map00360 Phenylalanine metabolism	0.259653	2.02	Cla97C02G031080.1	Amidase, putative	--	1.34	5.45e-06	Up	55.3	0.721	K01426	0.677	0.72	0.818	0.824	0.842	1.113	1.112	1.104	1.253	1.387	1.333
map00360 Phenylalanine metabolism	0.259653	2.02	Cla97C06G113970.1	Enoyl-CoA hydratase	--	1.437	0.000220076	Up	28.7	0.605	K01692	0.532	0.679	0.901	0.875	0.933	1.293	1.348	1.251	1.219	1.233	1.146
map00380 Tryptophan metabolism	0.0542725	3.43	Cla97C02G031080.1	Amidase, putative	--	1.34	5.45e-06	Up	55.3	0.721	K01426	0.677	0.72	0.818	0.824	0.842	1.113	1.112	1.104	1.253	1.387	1.333
map00380 Tryptophan metabolism	0.0542725	3.43	Cla97C03G054210.1	Cytochrome P450 family 71 protein	--	1.309	0.00468384	Up	58.4	0.397	K11868	0.368	0.558	1.275	1.34	1.202	1.708	1.736	1.551	0.594	0.548	0.605
map00380 Tryptophan metabolism	0.0542725	3.43	Cla97C06G113970.1	Enoyl-CoA hydratase	--	1.437	0.000220076	Up	28.7	0.605	K01692	0.532	0.679	0.901	0.875	0.933	1.293	1.348	1.251	1.219	1.233	1.146
map00410 beta-Alanine metabolism	0.302609	1.81	Cla97C02G036270.1	Acyl-coenzyme A oxidase	--	1.412	4.36e-05	Up	76.5	0.534	K00232	0.451	0.503	0.83	0.824	0.86	1.183	1.208	1.158	1.467	1.49	1.495
map00410 beta-Alanine metabolism	0.302609	1.81	Cla97C06G113970.1	Enoyl-CoA hydratase	--	1.437	0.000220076	Up	28.7	0.605	K01692	0.532	0.679	0.901	0.875	0.933	1.293	1.348	1.251	1.219	1.233	1.146
map00480 Glutathione metabolism	0.106857	2.19	Cla97C02G030990.1	Ascorbate peroxidase	--	1.324	2.64e-05	Up	31.5	0.685	K00434	0.716	0.731	0.974	0.943	0.959	1.25	1.289	1.268	1.034	1.02	1.012
map00480 Glutathione metabolism	0.106857	2.19	Cla97C04G079270.1	Glutathione s-transferase	--	1.674	3.25e-05	Up	27.1	0.36	K00799	0.407	0.401	0.795	0.844	0.855	1.418	1.365	1.391	1.375	1.392	1.417
map00480 Glutathione metabolism	0.106857	2.19	Cla97C09G169470.1	Glutathione peroxidase	--	1.499	0.000171565	Up	19.1	1.075	K00432	1.005	1.012	0.649	0.639	0.637	0.931	1.019	0.936	1.363	1.337	1.304
map00480 Glutathione metabolism	0.106857	2.19	Cla97C11G208340.1	gamma-glutamyltranspeptidase 3	--	1.421	0.000353699	Up	67.2	0.612	K18592	0.636	0.613	0.848	0.852	0.877	1.284	1.219	1.16	1.241	1.265	1.354
map00590 Arachidonic acid metabolism	0.0849131	4.05	Cla97C09G169470.1	Glutathione peroxidase	--	1.499	0.000171565	Up	19.1	1.075	K00432	1.005	1.012	0.649	0.639	0.637	0.931	1.019	0.936	1.363	1.337	1.304
map00590 Arachidonic acid metabolism	0.0849131	4.05	Cla97C11G208340.1	gamma-glutamyltranspeptidase 3	--	1.421	0.000353699	Up	67.2	0.612	K18592	0.636	0.613	0.848	0.852	0.877	1.284	1.219	1.16	1.241	1.265	1.354
map00592 alpha-Linolenic acid metabolism	0.0734864	3.04	Cla97C02G036270.1	Acyl-coenzyme A oxidase	--	1.412	4.36e-05	Up	76.5	0.534	K00232	0.451	0.503	0.83	0.824	0.86	1.183	1.208	1.158	1.467	1.49	1.495
map00592 alpha-Linolenic acid metabolism	0.0734864	3.04	Cla97C05G084200.1	3-ketoacyl-CoA thiolase 2, peroxisomal	--	1.893	8.3e-07	Up	48.4	0.456	K07513	0.405	0.425	0.708	0.687	0.701	1.339	1.328	1.301	1.489	1.518	1.577
map00592 alpha-Linolenic acid metabolism	0.0734864	3.04	Cla97C11G214710.1	Lecithin:cholesterol acyltransferase 3	--	1.493	0.000692289	Up	50.5	0.893	K22389	0.761	0.776	0.723	0.701	0.737	1.064	1.155	1.008	1.381	1.384	1.479
map00630 Glyoxylate and dicarboxylate metabolism	0.476441	1.38	Cla97C02G030880.1	Glycerate dehydrogenase-like protein	--	2.926	3.82e-05	Up	42.1	0.4	K15893	0.486	0.457	0.483	0.57	0.51	1.598	1.491	1.485	1.484	1.428	1.484
map00630 Glyoxylate and dicarboxylate metabolism	0.476441	1.38	Cla97C02G032410.1	Malate dehydrogenase	--	1.498	6.39e-05	Up	43.6	1.142	K00026	1.06	1.061	0.659	0.658	0.7	1.024	0.986	1.012	1.175	1.297	1.228
map00630 Glyoxylate and dicarboxylate metabolism	0.476441	1.38	Cla97C05G104530.1	Ribulose bisphosphate carboxylase small chain	--	1.617	0.000123396	Up	20.7	1.548	K01602	1.422	1.395	0.629	0.699	0.652	1.085	1.047	1.069	0.799	0.866	0.836
map00640 Propanoate metabolism	0.345156	1.64	Cla97C02G036270.1	Acyl-coenzyme A oxidase	--	1.412	4.36e-05	Up	76.5	0.534	K00232	0.451	0.503	0.83	0.824	0.86	1.183	1.208	1.158	1.467	1.49	1.495
map00640 Propanoate metabolism	0.345156	1.64	Cla97C06G113970.1	Enoyl-CoA hydratase	--	1.437	0.000220076	Up	28.7	0.605	K01692	0.532	0.679	0.901	0.875	0.933	1.293	1.348	1.251	1.219	1.233	1.146
map00710 Carbon fixation in photosynthetic organisms	0.000787657	3.9	Cla97C02G032410.1	Malate dehydrogenase	--	1.498	6.39e-05	Up	43.6	1.142	K00026	1.06	1.061	0.659	0.658	0.7	1.024	0.986	1.012	1.175	1.297	1.228
map00710 Carbon fixation in photosynthetic organisms	0.000787657	3.9	Cla97C05G094190.1	Glyceraldehyde-3-phosphate dehydrogenase	--	1.444	0.0118646	Up	42.8	1.197	K05298	1.157	1.229	0.638	0.71	0.844	1.08	1.083	1.003	1.085	1.048	0.999
map00710 Carbon fixation in photosynthetic organisms	0.000787657	3.9	Cla97C05G103110.1	Malate dehydrogenase	--	1.502	2.01e-05	Up	48	0.579	K00051	0.61	0.524	0.842	0.862	0.826	1.296	1.263	1.242	1.304	1.303	1.334
map00710 Carbon fixation in photosynthetic organisms	0.000787657	3.9	Cla97C05G104530.1	Ribulose bisphosphate carboxylase small chain	--	1.617	0.000123396	Up	20.7	1.548	K01602	1.422	1.395	0.629	0.699	0.652	1.085	1.047	1.069	0.799	0.866	0.836
map00710 Carbon fixation in photosynthetic organisms	0.000787657	3.9	Cla97C07G132400.1	Sedoheptulose-1,7-bisphosphatase	--	2.23	2.19e-06	Up	41.9	0.522	K01100	0.683	0.661	0.621	0.653	0.636	1.457	1.408	1.394	1.399	1.288	1.309
map00710 Carbon fixation in photosynthetic organisms	0.000787657	3.9	Cla97C10G185800.1	Phosphoribulokinase	--	1.421	0.00340737	Up	45.4	0.921	K00855	0.918	0.873	0.808	0.824	0.959	1.242	1.256	1.185	0.983	0.979	0.983
map00710 Carbon fixation in photosynthetic organisms	0.000787657	3.9	Cla97C11G210620.1	Fructose-bisphosphate aldolase	--	1.929	1.09e-05	Up	42.8	1.046	K01623	1.029	1.089	0.649	0.673	0.691	1.255	1.305	1.324	1.032	0.951	0.943
map00710 Carbon fixation in photosynthetic organisms	0.000787657	3.9	Cla97C07G130520.1	Phosphoribulokinase	--	1.344	0.0203769	Up	46.2		K00855	1.061	1.216		0.741	0.798		1.012	1.057		1.187	1.035
map00750 Vitamin B6 metabolism	0.0527143	5.26	Cla97C02G045540.1	Pyridoxal biosynthesis protein PDX1-like protein	--	1.49	1.73e-05	Up	33.4	0.981	K06215	0.823	0.84	0.751	0.759	0.778	1.149	1.153	1.108	1.144	1.279	1.286
map00750 Vitamin B6 metabolism	0.0527143	5.26	Cla97C10G205390.1	Pyridoxal biosynthesis protein PDX1.3	--	1.569	1.24e-06	Up	32.9	0.75	K06215	0.728	0.734	0.768	0.754	0.745	1.177	1.19	1.191	1.265	1.341	1.341
map01040 Biosynthesis of unsaturated fatty acids	0.134415	3.1	Cla97C02G036270.1	Acyl-coenzyme A oxidase	--	1.412	4.36e-05	Up	76.5	0.534	K00232	0.451	0.503	0.83	0.824	0.86	1.183	1.208	1.158	1.467	1.49	1.495
map01040 Biosynthesis of unsaturated fatty acids	0.134415	3.1	Cla97C05G084200.1	3-ketoacyl-CoA thiolase 2, peroxisomal	--	1.893	8.3e-07	Up	48.4	0.456	K07513	0.405	0.425	0.708	0.687	0.701	1.339	1.328	1.301	1.489	1.518	1.577
map01200 Carbon metabolism	0.32058	1.37	Cla97C02G030880.1	Glycerate dehydrogenase-like protein	--	2.926	3.82e-05	Up	42.1	0.4	K15893	0.486	0.457	0.483	0.57	0.51	1.598	1.491	1.485	1.484	1.428	1.484
map01200 Carbon metabolism	0.32058	1.37	Cla97C02G032410.1	Malate dehydrogenase	--	1.498	6.39e-05	Up	43.6	1.142	K00026	1.06	1.061	0.659	0.658	0.7	1.024	0.986	1.012	1.175	1.297	1.228
map01200 Carbon metabolism	0.32058	1.37	Cla97C02G036270.1	Acyl-coenzyme A oxidase	--	1.412	4.36e-05	Up	76.5	0.534	K00232	0.451	0.503	0.83	0.824	0.86	1.183	1.208	1.158	1.467	1.49	1.495
map01200 Carbon metabolism	0.32058	1.37	Cla97C05G094190.1	Glyceraldehyde-3-phosphate dehydrogenase	--	1.444	0.0118646	Up	42.8	1.197	K05298	1.157	1.229	0.638	0.71	0.844	1.08	1.083	1.003	1.085	1.048	0.999
map01200 Carbon metabolism	0.32058	1.37	Cla97C05G103110.1	Malate dehydrogenase	--	1.502	2.01e-05	Up	48	0.579	K00051	0.61	0.524	0.842	0.862	0.826	1.296	1.263	1.242	1.304	1.303	1.334
map01200 Carbon metabolism	0.32058	1.37	Cla97C05G104530.1	Ribulose bisphosphate carboxylase small chain	--	1.617	0.000123396	Up	20.7	1.548	K01602	1.422	1.395	0.629	0.699	0.652	1.085	1.047	1.069	0.799	0.866	0.836
map01200 Carbon metabolism	0.32058	1.37	Cla97C07G132400.1	Sedoheptulose-1,7-bisphosphatase	--	2.23	2.19e-06	Up	41.9	0.522	K01100	0.683	0.661	0.621	0.653	0.636	1.457	1.408	1.394	1.399	1.288	1.309
map01200 Carbon metabolism	0.32058	1.37	Cla97C10G185800.1	Phosphoribulokinase	--	1.421	0.00340737	Up	45.4	0.921	K00855	0.918	0.873	0.808	0.824	0.959	1.242	1.256	1.185	0.983	0.979	0.983
map01200 Carbon metabolism	0.32058	1.37	Cla97C11G210620.1	Fructose-bisphosphate aldolase	--	1.929	1.09e-05	Up	42.8	1.046	K01623	1.029	1.089	0.649	0.673	0.691	1.255	1.305	1.324	1.032	0.951	0.943
map01200 Carbon metabolism	0.32058	1.37	Cla97C07G130520.1	Phosphoribulokinase	--	1.344	0.0203769	Up	46.2		K00855	1.061	1.216		0.741	0.798		1.012	1.057		1.187	1.035
map01212 Fatty acid metabolism	0.113137	2.15	Cla97C02G036270.1	Acyl-coenzyme A oxidase	--	1.412	4.36e-05	Up	76.5	0.534	K00232	0.451	0.503	0.83	0.824	0.86	1.183	1.208	1.158	1.467	1.49	1.495
map01212 Fatty acid metabolism	0.113137	2.15	Cla97C05G084200.1	3-ketoacyl-CoA thiolase 2, peroxisomal	--	1.893	8.3e-07	Up	48.4	0.456	K07513	0.405	0.425	0.708	0.687	0.701	1.339	1.328	1.301	1.489	1.518	1.577
map01212 Fatty acid metabolism	0.113137	2.15	Cla97C05G086550.1	Long chain acyl-CoA synthetase 7	--	1.311	4.04e-06	Up	76.3	0.66	K01897	0.561	0.545	0.909	0.902	0.902	1.171	1.201	1.184	1.341	1.323	1.319
map01212 Fatty acid metabolism	0.113137	2.15	Cla97C06G113970.1	Enoyl-CoA hydratase	--	1.437	0.000220076	Up	28.7	0.605	K01692	0.532	0.679	0.901	0.875	0.933	1.293	1.348	1.251	1.219	1.233	1.146
map03040 Spliceosome	0.0733357	1.86	Cla97C03G062650.1	Serine/arginine-rich splicing factor SC35	--	1.545	0.000120092	Up	33.1	0.837	K12900	0.817	0.884	0.752	0.696	0.749	1.133	1.16	1.101	1.268	1.327	1.252
map03040 Spliceosome	0.0733357	1.86	Cla97C03G067680.1	Arginine/serine-rich splicing factor, putative	--	1.702	0.000204094	Up	45.2	0.41	K12890	0.603	0.404	0.694	0.753	0.703	1.288	1.152	1.219	1.608	1.492	1.673
map03040 Spliceosome	0.0733357	1.86	Cla97C05G093540.1	THO complex subunit 4D	--	1.636	0.000219048	Up	30.9	1.236	K12881	1.177	1.226	0.658	0.731	0.664	1.16	1.087	1.111	0.963	1.099	1.054
map03040 Spliceosome	0.0733357	1.86	Cla97C07G136230.1	apoptotic chromatin condensation inducer in the nucleus	--	1.514	8.2e-05	Up	48.1	1.347	K12875	1.457	1.349	0.7	0.669	0.693	1.013	1.085	1.024	0.891	0.85	0.997
map03040 Spliceosome	0.0733357	1.86	Cla97C09G168380.1	Arginine/serine-rich splicing factor, putative	--	1.458	0.000283377	Up	32.1	0.938	K12890	0.948	0.92	0.709	0.744	0.79	1.081	1.089	1.1	1.219	1.219	1.231
map03040 Spliceosome	0.0733357	1.86	Cla97C10G200740.1	Serine/arginine-rich splicing factor SC35	--	1.529	0.00702831	Up	25.2	0.601	K12900	0.498	0.556	0.913	0.694	0.778	1.152	1.27	1.224	1.334	1.538	1.442
map03040 Spliceosome	0.0733357	1.86	Cla97C11G217390.1	Heat shock 70 kDa protein	--	1.472	6.19e-06	Up	71	0.467	K03283	0.455	0.468	0.558	0.553	0.57	0.819	0.839	0.817	2.22	2.108	2.132
map03040 Spliceosome	0.0733357	1.86	Cla97C01G006990.1	THO complex subunit 2	--	1.391	0.047312	Up	213.2		K12879	1.689	1.766		0.672	0.677		1.007	0.869		0.632	0.688
map04136 Autophagy - other	0.216825	2.29	Cla97C04G073160.1	regulatory-associated protein of TOR 1-like	--	1.362	0.00592919	Up	149.7	0.959	K07204	0.906	1.183	0.812	0.902	0.737	1.104	1.12	1.114	1.125	1.072	0.965
map04136 Autophagy - other	0.216825	2.29	Cla97C03G066370.1	Kinase family protein	--	1.486	0.011745	Up	173.2		K08333	0.854	0.943		0.756	0.816		1.192	1.144		1.198	1.097
map04141 Protein processing in endoplasmic reticulum	0.000184317	2.95	Cla97C01G008920.1	17.4 kDa class I heat shock protein 3	--	2.249	3.52e-05	Up	15.9	0.377	K13993	0.381	0.297	0.658	0.693	0.612	1.485	1.422	1.508	1.373	1.442	1.45
map04141 Protein processing in endoplasmic reticulum	0.000184317	2.95	Cla97C02G033390.1	22.0 kDa class IV heat shock protein-like	--	1.62	9.71e-05	Up	24.2	0.464	K13993	0.44	0.49	0.505	0.484	0.536	0.824	0.811	0.836	2.181	2.199	2.15
map04141 Protein processing in endoplasmic reticulum	0.000184317	2.95	Cla97C03G051930.1	18.5 kDa class I heat shock protein-like	--	2.19	0.000205635	Up	18.2	0.543	K13993	0.409	0.452	0.683	0.571	0.669	1.347	1.454	1.41	1.427	1.565	1.469
map04141 Protein processing in endoplasmic reticulum	0.000184317	2.95	Cla97C03G051940.1	17.5 kDa class I heat shock protein-like	--	1.326	0.00440018	Up	16.5	0.987	K13993	0.773	0.982	0.859	0.863	0.931	1.176	1.253	1.088	0.923	1.111	0.999
map04141 Protein processing in endoplasmic reticulum	0.000184317	2.95	Cla97C04G071950.1	Heat-shock protein, putative	--	1.786	3.63e-05	Up	23.6	0.619	K13993	0.645	0.659	0.721	0.74	0.791	1.337	1.363	1.323	1.318	1.297	1.209
map04141 Protein processing in endoplasmic reticulum	0.000184317	2.95	Cla97C05G094650.1	18.1 kDa class I heat shock protein-like	--	1.462	0.0472723	Up	16	0.338	K13993	0.483	0.601	0.461	0.621	0.745	0.869	0.885	0.917	2.332	2.041	1.738
map04141 Protein processing in endoplasmic reticulum	0.000184317	2.95	Cla97C05G099440.1	17.3 kDa class ii heat shock protein	--	1.991	0.0038793	Up	17.4	0.571	K13993	0.62	0.413	0.632	0.64	0.448	1.148	1.131	1.146	1.707	1.573	1.997
map04141 Protein processing in endoplasmic reticulum	0.000184317	2.95	Cla97C05G108440.1	Heat shock protein, putative	--	1.381	0.0355961	Up	26.3	0.864	K13993	0.79	0.691	0.643	0.867	0.896	1.08	1.099	1.144	1.413	1.244	1.269
map04141 Protein processing in endoplasmic reticulum	0.000184317	2.95	Cla97C07G132190.1	17.8 kDa class I heat shock protein-like	--	2.689	0.000700051	Up	18.1	0.416	K13993	0.387	0.619	0.402	0.436	0.564	1.31	1.268	1.192	1.839	1.899	1.68
map04141 Protein processing in endoplasmic reticulum	0.000184317	2.95	Cla97C08G145950.1	22.0 kDa class IV heat shock protein	--	1.695	0.00482718	Up	21.6	0.487	K13993	0.562	0.434	0.439	0.594	0.467	0.879	0.848	0.815	2.195	1.961	2.283
map04141 Protein processing in endoplasmic reticulum	0.000184317	2.95	Cla97C10G187290.1	Heat-shock protein, putative	--	1.753	0.000691063	Up	23.5	0.512	K13993	0.497	0.606	0.745	0.792	0.868	1.487	1.426	1.302	1.256	1.285	1.223
map04141 Protein processing in endoplasmic reticulum	0.000184317	2.95	Cla97C11G217390.1	Heat shock 70 kDa protein	--	1.472	6.19e-06	Up	71	0.467	K03283	0.455	0.468	0.558	0.553	0.57	0.819	0.839	0.817	2.22	2.108	2.132
map04141 Protein processing in endoplasmic reticulum	0.000184317	2.95	Cla97C04G074210.1	18.1 kDa class I heat shock protein-like	--	1.898	0.00310531	Up	15.9		K13993	0.715	0.679		0.571	0.562		1.038	1.113		1.496	1.654
map04141 Protein processing in endoplasmic reticulum	0.000184317	2.95	Cla97C07G132310.1	17.8 kDa class I heat shock protein-like	--	3.252	0.0141095	Up	17.6		K13993	0.315	0.366		0.3	0.399		1.128	1.145		2.257	2.09
map04146 Peroxisome	0.431665	1.61	Cla97C02G036270.1	Acyl-coenzyme A oxidase	--	1.412	4.36e-05	Up	76.5	0.534	K00232	0.451	0.503	0.83	0.824	0.86	1.183	1.208	1.158	1.467	1.49	1.495
map04146 Peroxisome	0.431665	1.61	Cla97C05G084200.1	3-ketoacyl-CoA thiolase 2, peroxisomal	--	1.893	8.3e-07	Up	48.4	0.456	K07513	0.405	0.425	0.708	0.687	0.701	1.339	1.328	1.301	1.489	1.518	1.577
map04146 Peroxisome	0.431665	1.61	Cla97C05G086550.1	Long chain acyl-CoA synthetase 7	--	1.311	4.04e-06	Up	76.3	0.66	K01897	0.561	0.545	0.909	0.902	0.902	1.171	1.201	1.184	1.341	1.323	1.319

## Sheet: Down
KEGG pathway	Mapping	Background	All Mapping	All Background	Fold Enrichment	Fisher's exact test p value	-log10(p value)	Related proteins
map03010 Ribosome	13	158	87	2368	2.24	0.00642799	2.19	Cla97C03G060110.1 Cla97C04G076500.1 Cla97C05G102190.1 Cla97C05G106450.1 Cla97C07G132330.1 Cla97C07G132970.1 Cla97C07G135120.1 Cla97C07G140420.1 Cla97C08G152190.1 Cla97C08G156880.1 Cla97C09G166870.1 Cla97C09G173210.1 Cla97C11G219700.1
map00100 Steroid biosynthesis	3	13	87	2368	6.28	0.0104898	1.98	Cla97C07G138660.1 Cla97C10G195060.1 Cla97C10G195070.1
map00500 Starch and sucrose metabolism	7	81	87	2368	2.35	0.0271273	1.57	Cla97C01G008790.1 Cla97C02G045770.1 Cla97C03G063780.1 Cla97C04G072460.1 Cla97C07G136190.1 Cla97C09G169430.1 Cla97C10G186050.1

## Sheet: Down Pathway2Protein
KEGG pathway	Fisher's exact test p value	Fold Enrichment	Protein accession	Protein description	Gene name	26DAP/18DAP Ratio	26DAP/18DAP P value	Regulated Type	MW [kDa]	10DAP_1	KEGG KO No.	10DAP_2	10DAP_3	18DAP_1	18DAP_2	18DAP_3	26DAP_1	26DAP_2	26DAP_3	34DAP_1	34DAP_2	34DAP_3
map00052 Galactose metabolism	0.179812	2.04	Cla97C04G070460.1	Alkaline alpha-galactosidase seed imbibition protein	--	0.656	5.3e-05	Down	89.2	1.183	K06617	1.251	1.268	1.203	1.234	1.27	0.838	0.793	0.801	0.726	0.736	0.705
map00052 Galactose metabolism	0.179812	2.04	Cla97C06G120620.1	Raffinose synthase	--	0.761	0.000710509	Down	85.8	1.464	K06617	1.34	1.427	1.044	1.046	1.107	0.78	0.841	0.812	0.77	0.739	0.739
map00052 Galactose metabolism	0.179812	2.04	Cla97C10G197800.1	Aldose 1-epimerase	--	0.7	0.00107446	Down	42.5	1.108	K01785	1.13	1.178	1.241	1.148	1.164	0.887	0.809	0.792	0.856	0.932	0.866
map00061 Fatty acid biosynthesis	0.302595	1.81	Cla97C07G141980.1	long chain acyl-CoA synthetase 4-like	--	0.665	6.52e-05	Down	73.8	1.016	K01897	1.088	0.992	1.072	1.043	1.078	0.704	0.683	0.735	1.111	1.187	1.196
map00061 Fatty acid biosynthesis	0.302595	1.81	Cla97C11G221760.1	Long-chain acyl-CoA synthetase 4	--	0.717	0.000402779	Down	75.9	0.925	K01897	0.81	0.895	1.11	1.204	1.174	0.864	0.811	0.826	1.133	1.105	1.127
map00071 Fatty acid degradation	0.316366	1.76	Cla97C07G141980.1	long chain acyl-CoA synthetase 4-like	--	0.665	6.52e-05	Down	73.8	1.016	K01897	1.088	0.992	1.072	1.043	1.078	0.704	0.683	0.735	1.111	1.187	1.196
map00071 Fatty acid degradation	0.316366	1.76	Cla97C11G221760.1	Long-chain acyl-CoA synthetase 4	--	0.717	0.000402779	Down	75.9	0.925	K01897	0.81	0.895	1.11	1.204	1.174	0.864	0.811	0.826	1.133	1.105	1.127
map00100 Steroid biosynthesis	0.0104898	6.28	Cla97C07G138660.1	Cytochrome P450	--	0.691	0.0141376	Down	55.1	1.044	K05917	0.91	1.046	1.266	1.191	1.109	0.696	0.913	0.854	0.993	0.987	0.991
map00100 Steroid biosynthesis	0.0104898	6.28	Cla97C10G195060.1	Methyltransferase	--	0.717	0.000352398	Down	39.1	1.982	K00559	1.885	1.98	0.879	0.863	0.826	0.607	0.641	0.593	0.558	0.574	0.583
map00100 Steroid biosynthesis	0.0104898	6.28	Cla97C10G195070.1	Methyltransferase	--	0.697	0.00520474	Down	39	2.409	K00559	2.211	2.143	0.726	0.755	0.73	0.45	0.551	0.541	0.466	0.491	0.502
map00220 Arginine biosynthesis	0.330078	1.7	Cla97C04G071880.1	Glutamate dehydrogenase	--	0.744	5.85e-05	Down	44.5	1.329	K00261	1.234	1.377	1.151	1.208	1.17	0.873	0.889	0.863	0.601	0.635	0.633
map00220 Arginine biosynthesis	0.330078	1.7	Cla97C06G127510.1	Argininosuccinate synthase	--	0.572	0.000116004	Down	45.7	1.517	K01940	1.373	1.388	1.124	1.138	1.114	0.62	0.692	0.619	0.783	0.713	0.759
map00250 Alanine, aspartate and glutamate metabolism	0.065861	2.59	Cla97C04G071880.1	Glutamate dehydrogenase	--	0.744	5.85e-05	Down	44.5	1.329	K00261	1.234	1.377	1.151	1.208	1.17	0.873	0.889	0.863	0.601	0.635	0.633
map00250 Alanine, aspartate and glutamate metabolism	0.065861	2.59	Cla97C04G073140.1	alanine--glyoxylate aminotransferase 2 homolog 2, mitochondrial-like	--	0.749	0.00112325	Down	52	1.133	K00827	1.14	1.177	1.246	1.169	1.279	0.933	0.951	0.884	0.645	0.716	0.613
map00250 Alanine, aspartate and glutamate metabolism	0.065861	2.59	Cla97C06G127510.1	Argininosuccinate synthase	--	0.572	0.000116004	Down	45.7	1.517	K01940	1.373	1.388	1.124	1.138	1.114	0.62	0.692	0.619	0.783	0.713	0.759
map00250 Alanine, aspartate and glutamate metabolism	0.065861	2.59	Cla97C11G222730.1	gamma aminobutyrate transaminase 1, mitochondrial	--	0.732	0.00231021	Down	56.9	2.069	K16871	2.078	1.89	0.839	0.843	0.834	0.573	0.6	0.668	0.53	0.493	0.619
map00270 Cysteine and methionine metabolism	0.0790166	2.16	Cla97C02G043570.1	Tyrosine aminotransferase	--	0.743	3.58e-05	Down	47.1	1.513	K00815	1.341	1.62	1.067	1.088	1.057	0.789	0.784	0.815	0.608	0.75	0.578
map00270 Cysteine and methionine metabolism	0.0790166	2.16	Cla97C02G043890.1	1-aminocyclopropane-1-carboxylate oxidase	--	0.498	0.000444743	Down	35.8	1.847	K05933	1.645	1.622	1.258	1.151	1.229	0.571	0.563	0.679	0.324	0.642	0.508
map00270 Cysteine and methionine metabolism	0.0790166	2.16	Cla97C04G073140.1	alanine--glyoxylate aminotransferase 2 homolog 2, mitochondrial-like	--	0.749	0.00112325	Down	52	1.133	K00827	1.14	1.177	1.246	1.169	1.279	0.933	0.951	0.884	0.645	0.716	0.613
map00270 Cysteine and methionine metabolism	0.0790166	2.16	Cla97C06G113030.1	Cysteine synthase	--	0.598	4.59e-06	Down	40.2	1.428	K13034	1.441	1.477	1.358	1.356	1.333	0.828	0.789	0.805	0.459	0.429	0.449
map00270 Cysteine and methionine metabolism	0.0790166	2.16	Cla97C09G173910.1	1-aminocyclopropane-1-carboxylate oxidase 1	--	0.6	2.42e-05	Down	35.9	1.677	K05933	1.667	1.576	1.024	1.05	1.042	0.647	0.6	0.622	0.618	0.674	0.671
map00400 Phenylalanine, tyrosine and tryptophan biosynthesis	0.384075	1.51	Cla97C02G027440.1	Shikimate kinase	--	0.716	0.00196025	Down	33.6	0.353	K00891	0.385		1.611	1.639		1.178	1.15		0.858	0.825
map00400 Phenylalanine, tyrosine and tryptophan biosynthesis	0.384075	1.51	Cla97C02G043570.1	Tyrosine aminotransferase	--	0.743	3.58e-05	Down	47.1	1.513	K00815	1.341	1.62	1.067	1.088	1.057	0.789	0.784	0.815	0.608	0.75	0.578
map00460 Cyanoamino acid metabolism	0.0677472	3.14	Cla97C03G063780.1	beta-glucosidase 12-like	--	0.582	0.00165487	Down	54	1.664	K01188	1.569	1.775	1.091	1.117	1.094	0.604	0.735	0.583	0.566	0.563	0.493
map00460 Cyanoamino acid metabolism	0.0677472	3.14	Cla97C06G113030.1	Cysteine synthase	--	0.598	4.59e-06	Down	40.2	1.428	K13034	1.441	1.477	1.358	1.356	1.333	0.828	0.789	0.805	0.459	0.429	0.449
map00460 Cyanoamino acid metabolism	0.0677472	3.14	Cla97C07G136190.1	beta-glucosidase 44-like	--	0.687	0.000178409	Down	58.2	0.946	K05350	0.96	0.944	1.376	1.374	1.283	0.895	0.941	0.935	0.855	0.918	0.824
map00500 Starch and sucrose metabolism	0.0271273	2.35	Cla97C01G008790.1	Sucrose synthase	--	0.631	0.000408491	Down	95.2	0.993	K00695	0.975	0.959	0.983	0.957	0.993	0.57	0.627	0.655	1.455	1.456	1.372
map00500 Starch and sucrose metabolism	0.0271273	2.35	Cla97C02G045770.1	Alpha-1,4 glucan phosphorylase	--	0.748	0.000754029	Down	95.5	0.662	K00688	0.687	0.681	1.04	1.02	1.018	0.781	0.722	0.799	1.519	1.581	1.42
map00500 Starch and sucrose metabolism	0.0271273	2.35	Cla97C03G063780.1	beta-glucosidase 12-like	--	0.582	0.00165487	Down	54	1.664	K01188	1.569	1.775	1.091	1.117	1.094	0.604	0.735	0.583	0.566	0.563	0.493
map00500 Starch and sucrose metabolism	0.0271273	2.35	Cla97C04G072460.1	4-alpha-glucanotransferase, putative	--	0.756	7.89e-05	Down	82.4	0.702	K00705	0.723	0.702	1.222	1.193	1.255	0.909	0.931	0.934	1.082	1.127	1.101
map00500 Starch and sucrose metabolism	0.0271273	2.35	Cla97C07G136190.1	beta-glucosidase 44-like	--	0.687	0.000178409	Down	58.2	0.946	K05350	0.96	0.944	1.376	1.374	1.283	0.895	0.941	0.935	0.855	0.918	0.824
map00500 Starch and sucrose metabolism	0.0271273	2.35	Cla97C09G169430.1	isoamylase 2, chloroplastic	--	0.742	6.92e-05	Down	98.1	0.773	K01214	0.731	0.844	1.115	1.111	1.116	0.799	0.834	0.847	1.279	1.284	1.274
map00500 Starch and sucrose metabolism	0.0271273	2.35	Cla97C10G186050.1	Trehalose-6-phosphate synthase-8	--	0.748	0.00866718	Down	97.5	1.098	K16055	1.11	1.219	0.861	0.884	0.993	0.712	0.709	0.627	1.329	1.253	1.16
map00592 alpha-Linolenic acid metabolism	0.247251	2.09	Cla97C06G123370.1	Phospholipase A2 like 3	--	0.677	0.000705299	Down	17.2	1.786	K01047	1.527	1.466	1.264	1.271	1.144	0.807	0.816	0.869	0.144	0.368	0.455
map00592 alpha-Linolenic acid metabolism	0.247251	2.09	Cla97C11G214950.1	12-oxophytodienoate reductase	--	0.703	0.0257357	Down	41.8	1.158	K05894	1.759	1.396	1.132	1.211	1.168	0.948	0.669	0.85	0.762	0.361	0.587
map00940 Phenylpropanoid biosynthesis	0.0923404	2.06	Cla97C03G063780.1	beta-glucosidase 12-like	--	0.582	0.00165487	Down	54	1.664	K01188	1.569	1.775	1.091	1.117	1.094	0.604	0.735	0.583	0.566	0.563	0.493
map00940 Phenylpropanoid biosynthesis	0.0923404	2.06	Cla97C05G098800.1	Peroxidase	--	0.763	0.0424065	Down	35.8	1.568	K00430	2.016	1.991	0.907	0.923	0.901	0.832	0.622	0.631	0.69	0.527	0.481
map00940 Phenylpropanoid biosynthesis	0.0923404	2.06	Cla97C07G136190.1	beta-glucosidase 44-like	--	0.687	0.000178409	Down	58.2	0.946	K05350	0.96	0.944	1.376	1.374	1.283	0.895	0.941	0.935	0.855	0.918	0.824
map00940 Phenylpropanoid biosynthesis	0.0923404	2.06	Cla97C10G193130.1	caffeoylshikimate esterase	--	0.743	0.0103452	Down	36.5	0.882	K18368	0.787	0.691	1.329	1.43	1.453	1.118	0.924	1.089	0.717	0.758	0.767
map00940 Phenylpropanoid biosynthesis	0.0923404	2.06	Cla97C10G197400.1	Peroxidase	--	0.696	0.000117127	Down	35.9	1.321	K00430	1.259	1.253	1.298	1.269	1.232	0.849	0.893	0.903	0.56	0.592	0.577
map01212 Fatty acid metabolism	0.424424	1.67	Cla97C07G141980.1	long chain acyl-CoA synthetase 4-like	--	0.665	6.52e-05	Down	73.8	1.016	K01897	1.088	0.992	1.072	1.043	1.078	0.704	0.683	0.735	1.111	1.187	1.196
map01212 Fatty acid metabolism	0.424424	1.67	Cla97C10G200350.1	Fatty acid desaturase 2	--	0.726	0.017011	Down	44	2.319	K10256	2.548	2.575	0.697	0.608	0.664	0.545	0.456	0.429	0.438	0.444	0.358
map01212 Fatty acid metabolism	0.424424	1.67	Cla97C11G221760.1	Long-chain acyl-CoA synthetase 4	--	0.717	0.000402779	Down	75.9	0.925	K01897	0.81	0.895	1.11	1.204	1.174	0.864	0.811	0.826	1.133	1.105	1.127
map03010 Ribosome	0.00642799	2.24	Cla97C03G060110.1	60S ribosomal protein L30-like	--	0.768	0.00142508	Down	12.4	1.258	K02908	1.424	1.159	1.11	1.034	1.12	0.837	0.803	0.867	0.795	0.739	0.853
map03010 Ribosome	0.00642799	2.24	Cla97C04G076500.1	60S ribosomal protein L24	--	0.662	0.0212303	Down	18.6	1.889	K02896		1.66	0.971		1.055	0.641		0.701	0.5		0.583
map03010 Ribosome	0.00642799	2.24	Cla97C05G102190.1	40S ribosomal protein S29, putative, expressed	--	0.574	7.84e-05	Down	43.7	0.989	K02980	0.991	0.892	1.537	1.555	1.638	0.919	0.857	0.938	0.554	0.597	0.531
map03010 Ribosome	0.00642799	2.24	Cla97C05G106450.1	40S ribosomal protein S9-2	--	0.769	0.0316965	Down	23	1.154	K02997	1.189	1.148	0.931	0.911	0.969	0.646	0.677	0.84	1.166	1.205	1.002
map03010 Ribosome	0.00642799	2.24	Cla97C07G132330.1	60S ribosomal protein L35a-1	--	0.756	0.000498919	Down	12.9	1.107	K02917	1.097	1.114	1.12	1.083	1.128	0.799	0.86	0.858	0.916	0.851	0.894
map03010 Ribosome	0.00642799	2.24	Cla97C07G132970.1	40S ribosomal protein S4	--	0.736	0.0266542	Down	29.8	1.246	K02987	1.129	1.251	0.831	1.007	0.907	0.583	0.733	0.705	1.34	1.131	1.199
map03010 Ribosome	0.00642799	2.24	Cla97C07G135120.1	40S ribosomal protein S10-1-like	--	0.661	3.81e-05	Down	20	1.501	K02947	1.447	1.438	1.253	1.276	1.231	0.828	0.803	0.855	0.334	0.411	0.405
map03010 Ribosome	0.00642799	2.24	Cla97C07G140420.1	60S ribosomal protein L28-2-like	--	0.594	9.73e-05	Down	16.7	1.181	K02903	1.153	1.081	1.561	1.57	1.494	0.895	0.881	0.969	0.404	0.407	0.531
map03010 Ribosome	0.00642799	2.24	Cla97C08G152190.1	50S ribosomal protein L21, related protein	--	0.74	3.93e-05	Down	30	1.818	K02888	1.743	1.927	0.95	0.987	0.992	0.724	0.73	0.713	0.571	0.558	0.368
map03010 Ribosome	0.00642799	2.24	Cla97C08G156880.1	40S ribosomal protein S11	--	0.658	2.75e-05	Down	17.8	1.343	K02949	1.475	1.284	1.259	1.283	1.28	0.852	0.808	0.856	0.542	0.434	0.679
map03010 Ribosome	0.00642799	2.24	Cla97C09G166870.1	60S ribosomal protein L44-like	--	0.53	0.000522523	Down	12	1.194	K02929	1.254	1.112	1.613	1.438	1.319	0.741	0.796	0.779	0.453	0.511	0.354
map03010 Ribosome	0.00642799	2.24	Cla97C09G173210.1	40S ribosomal protein S4	--	0.736	0.00946005	Down	29.8	1.168	K02987	1.205		0.864	0.908		0.663	0.641		1.213	1.218
map03010 Ribosome	0.00642799	2.24	Cla97C11G219700.1	60S ribosomal protein L17-2	--	0.739	0.00647246	Down	20.6	1.242	K02880	1.227	1.322	1.176	1.407	1.218	0.969	0.919	0.92	0.331	0.448	0.54
map04120 Ubiquitin mediated proteolysis	0.227762	1.81	Cla97C01G002610.1	ubiquitin-conjugating enzyme E2 4-like	--	0.687	0.00105964	Down	20.9	1.371	K10576	1.389	1.283	1.243	1.113	1.23	0.803	0.794	0.865	0.583	0.676	0.622
map04120 Ubiquitin mediated proteolysis	0.227762	1.81	Cla97C02G045340.1	ubiquitin-activating enzyme E1 1	--	0.754	7.14e-07	Down	129.7	1.053	K03178	1.026	1.031	1.027	1.036	1.028	0.771	0.783	0.777	1.16	1.169	1.14
map04120 Ubiquitin mediated proteolysis	0.227762	1.81	Cla97C06G114750.1	cullin-1	--	0.732	0.00378047	Down	86.7	0.959	K03347	0.899	0.901	1.041	1.055	1.113	0.712	0.833	0.805	1.17	1.207	1.122
map04146 Peroxisome	0.103026	2.22	Cla97C03G063500.1	Xanthine dehydrogenase, putative	--	0.75	0.000232159	Down	150.6	0.539	K00106	0.599	0.682	1.056	1.115	1.045	0.818	0.788	0.807	1.493	1.424	1.429
map04146 Peroxisome	0.103026	2.22	Cla97C07G141980.1	long chain acyl-CoA synthetase 4-like	--	0.665	6.52e-05	Down	73.8	1.016	K01897	1.088	0.992	1.072	1.043	1.078	0.704	0.683	0.735	1.111	1.187	1.196
map04146 Peroxisome	0.103026	2.22	Cla97C07G143450.1	Acetolactate synthase	--	0.76	3.67e-05	Down	61.9	1.395	K12261	1.355	1.435	1.107	1.075	1.08	0.842	0.813	0.823	0.647	0.716	0.693
map04146 Peroxisome	0.103026	2.22	Cla97C11G221760.1	Long-chain acyl-CoA synthetase 4	--	0.717	0.000402779	Down	75.9	0.925	K01897	0.81	0.895	1.11	1.204	1.174	0.864	0.811	0.826	1.133	1.105	1.127
map04626 Plant-pathogen interaction	0.121379	2.09	Cla97C02G026440.1	Calcium-dependent protein kinase	--	0.756	0.0111981	Down	56.2	1.15	K13412	1.148	1.147	0.931	0.884	0.803	0.713	0.609	0.657	1.314	1.333	1.377
map04626 Plant-pathogen interaction	0.121379	2.09	Cla97C02G038500.1	Calcium binding family protein	--	0.722	0.00785519	Down	16	1.848	K13448	2.225	2.104	0.881	0.815	0.834	0.671	0.541	0.615	0.6	0.418	0.447
map04626 Plant-pathogen interaction	0.121379	2.09	Cla97C08G159400.1	Calcium-binding EF-hand family protein, putative	--	0.658	0.00325908	Down	18.5	1.142	K13448	1.098	1.117	1.33	1.604	1.322	0.916	0.967	0.917	0.566	0.395	0.632
map04626 Plant-pathogen interaction	0.121379	2.09	Cla97C10G189620.1	calcium-dependent protein kinase 2-like	--	0.75	0.000115855	Down	58.4	0.942	K13412	1.007	0.971	1.024	1.034	1.003	0.748	0.791	0.757	1.246	1.235	1.2

## Sheet: all
KEGG pathway	Mapping	Background	All Mapping	All Background	Fold Enrichment	Fisher's exact test p value	-log10(p value)	Related proteins
map00195 Photosynthesis	8	28	177	2368	3.82	0.000705394	3.15	Cla97C02G027850.1 Cla97C05G086450.1 Cla97C05G091900.1 Cla97C07G137540.1 Cla97C08G148420.1 Cla97C09G178700.1 Cla97C10G185280.1 Cla97C08G152480.1
map04141 Protein processing in endoplasmic reticulum	19	125	177	2368	2.03	0.00234016	2.63	Cla97C01G008920.1 Cla97C01G024750.1 Cla97C02G033390.1 Cla97C02G040810.1 Cla97C03G051930.1 Cla97C03G051940.1 Cla97C04G071950.1 Cla97C04G075000.1 Cla97C05G080230.1 Cla97C05G094650.1 Cla97C05G099440.1 Cla97C05G108440.1 Cla97C06G114750.1 Cla97C07G132190.1 Cla97C08G145950.1 Cla97C10G187290.1 Cla97C11G217390.1 Cla97C04G074210.1 Cla97C07G132310.1
map00232 Caffeine metabolism	2	2	177	2368	13.38	0.00555784	2.26	Cla97C03G063500.1 Cla97C05G103640.1
map00071 Fatty acid degradation	6	31	177	2368	2.59	0.0244725	1.61	Cla97C02G036270.1 Cla97C05G084200.1 Cla97C05G086550.1 Cla97C06G113970.1 Cla97C07G141980.1 Cla97C11G221760.1
map00908 Zeatin biosynthesis	2	4	177	2368	6.69	0.0301491	1.52	Cla97C04G070610.1 Cla97C10G202910.1
map00750 Vitamin B6 metabolism	3	10	177	2368	4.01	0.0333043	1.48	Cla97C02G045540.1 Cla97C10G205390.1 Cla97C03G066050.1
map03010 Ribosome	19	158	177	2368	1.61	0.0396685	1.4	Cla97C03G060110.1 Cla97C04G075480.1 Cla97C04G076500.1 Cla97C05G102190.1 Cla97C05G106450.1 Cla97C07G132330.1 Cla97C07G132970.1 Cla97C07G135120.1 Cla97C07G140420.1 Cla97C08G146130.1 Cla97C08G152190.1 Cla97C08G156880.1 Cla97C09G166870.1 Cla97C09G173210.1 Cla97C10G203840.1 Cla97C11G214200.1 Cla97C11G219700.1 Cla97C07G142650.1 Cla97C08G154200.1
map00592 alpha-Linolenic acid metabolism	5	26	177	2368	2.57	0.040017	1.4	Cla97C02G036270.1 Cla97C05G084200.1 Cla97C06G123370.1 Cla97C11G214710.1 Cla97C11G214950.1

## Sheet: all Pathway2Protein
KEGG pathway	Fisher's exact test p value	Fold Enrichment	Protein accession	Protein description	Gene name	26DAP/18DAP Ratio	26DAP/18DAP P value	Regulated Type	MW [kDa]	10DAP_1	KEGG KO No.	10DAP_2	10DAP_3	18DAP_1	18DAP_2	18DAP_3	26DAP_1	26DAP_2	26DAP_3	34DAP_1	34DAP_2	34DAP_3
map00061 Fatty acid biosynthesis	0.487159	1.34	Cla97C05G086550.1	Long chain acyl-CoA synthetase 7	--	1.311	4.04e-06	Up	76.3	0.66	K01897	0.561	0.545	0.909	0.902	0.902	1.171	1.201	1.184	1.341	1.323	1.319
map00061 Fatty acid biosynthesis	0.487159	1.34	Cla97C07G141980.1	long chain acyl-CoA synthetase 4-like	--	0.665	6.52e-05	Down	73.8	1.016	K01897	1.088	0.992	1.072	1.043	1.078	0.704	0.683	0.735	1.111	1.187	1.196
map00061 Fatty acid biosynthesis	0.487159	1.34	Cla97C11G221760.1	Long-chain acyl-CoA synthetase 4	--	0.717	0.000402779	Down	75.9	0.925	K01897	0.81	0.895	1.11	1.204	1.174	0.864	0.811	0.826	1.133	1.105	1.127
map00071 Fatty acid degradation	0.0244725	2.59	Cla97C02G036270.1	Acyl-coenzyme A oxidase	--	1.412	4.36e-05	Up	76.5	0.534	K00232	0.451	0.503	0.83	0.824	0.86	1.183	1.208	1.158	1.467	1.49	1.495
map00071 Fatty acid degradation	0.0244725	2.59	Cla97C05G084200.1	3-ketoacyl-CoA thiolase 2, peroxisomal	--	1.893	8.3e-07	Up	48.4	0.456	K07513	0.405	0.425	0.708	0.687	0.701	1.339	1.328	1.301	1.489	1.518	1.577
map00071 Fatty acid degradation	0.0244725	2.59	Cla97C05G086550.1	Long chain acyl-CoA synthetase 7	--	1.311	4.04e-06	Up	76.3	0.66	K01897	0.561	0.545	0.909	0.902	0.902	1.171	1.201	1.184	1.341	1.323	1.319
map00071 Fatty acid degradation	0.0244725	2.59	Cla97C06G113970.1	Enoyl-CoA hydratase	--	1.437	0.000220076	Up	28.7	0.605	K01692	0.532	0.679	0.901	0.875	0.933	1.293	1.348	1.251	1.219	1.233	1.146
map00071 Fatty acid degradation	0.0244725	2.59	Cla97C07G141980.1	long chain acyl-CoA synthetase 4-like	--	0.665	6.52e-05	Down	73.8	1.016	K01897	1.088	0.992	1.072	1.043	1.078	0.704	0.683	0.735	1.111	1.187	1.196
map00071 Fatty acid degradation	0.0244725	2.59	Cla97C11G221760.1	Long-chain acyl-CoA synthetase 4	--	0.717	0.000402779	Down	75.9	0.925	K01897	0.81	0.895	1.11	1.204	1.174	0.864	0.811	0.826	1.133	1.105	1.127
map00100 Steroid biosynthesis	0.0673005	3.09	Cla97C07G138660.1	Cytochrome P450	--	0.691	0.0141376	Down	55.1	1.044	K05917	0.91	1.046	1.266	1.191	1.109	0.696	0.913	0.854	0.993	0.987	0.991
map00100 Steroid biosynthesis	0.0673005	3.09	Cla97C10G195060.1	Methyltransferase	--	0.717	0.000352398	Down	39.1	1.982	K00559	1.885	1.98	0.879	0.863	0.826	0.607	0.641	0.593	0.558	0.574	0.583
map00100 Steroid biosynthesis	0.0673005	3.09	Cla97C10G195070.1	Methyltransferase	--	0.697	0.00520474	Down	39	2.409	K00559	2.211	2.143	0.726	0.755	0.73	0.45	0.551	0.541	0.466	0.491	0.502
map00195 Photosynthesis	0.000705394	3.82	Cla97C02G027850.1	Cytochrome b6-f complex iron-sulfur subunit	--	1.301	0.0034574	Up	24.2	1.566	K02636	1.535	1.559	0.79	0.82	0.732	1.008	0.973	1.065	0.634	0.686	0.551
map00195 Photosynthesis	0.000705394	3.82	Cla97C05G086450.1	Photosystem I reaction center subunit II	--	1.679	0.0251393	Up	22.8	0.601	K02692	1.12	1.023	0.53	0.835	0.753	1.336	1.067	1.154	1.533	0.977	1.071
map00195 Photosynthesis	0.000705394	3.82	Cla97C05G091900.1	Ferredoxin	--	1.597	0.000137507	Up	15.7	0.372	K02639	0.344	0.412	0.845	0.92	0.903	1.477	1.4	1.384	1.306	1.336	1.301
map00195 Photosynthesis	0.000705394	3.82	Cla97C07G137540.1	oxygen-evolving enhancer protein 2, chloroplastic	--	1.558	0.0379441	Up	28.3	1.145	K02717	1.099		0.725	0.849		1.278	1.175		0.851	0.877
map00195 Photosynthesis	0.000705394	3.82	Cla97C08G148420.1	photosystem II 22 kDa protein, chloroplastic	--	1.346	0.00634154	Up	28.8	1.08	K03542	0.794	0.933	0.785	0.771	0.815	0.998	1.181	1.013	1.137	1.253	1.239
map00195 Photosynthesis	0.000705394	3.82	Cla97C09G178700.1	Photosystem I P700 chlorophyll a apoprotein A1	--	1.486	0.00162361	Up	17.6	1.232	K02689	1.256		0.729	0.714		1.059	1.085		0.98	0.945
map00195 Photosynthesis	0.000705394	3.82	Cla97C10G185280.1	Ferredoxin--NADP reductase	--	1.673	1.73e-05	Up	40.3	1.136	K02641	1.046	1.085	0.812	0.779	0.809	1.325	1.308	1.382	0.761	0.789	0.73
map00195 Photosynthesis	0.000705394	3.82	Cla97C08G152480.1	ATP synthase subunit b, chloroplastic	--	1.487	0.0311468	Up	8.8		K02109	1.933	1.63		0.624	0.72		0.99	1.008		0.453	0.642
map00232 Caffeine metabolism	0.00555784	13.38	Cla97C03G063500.1	Xanthine dehydrogenase, putative	--	0.75	0.000232159	Down	150.6	0.539	K00106	0.599	0.682	1.056	1.115	1.045	0.818	0.788	0.807	1.493	1.424	1.429
map00232 Caffeine metabolism	0.00555784	13.38	Cla97C05G103640.1	Uricase	--	1.325	0.000200299	Up	35.3	0.463	K00365	0.433	0.485	0.985	1	1.014	1.342	1.358	1.273	1.144	1.176	1.165
map00270 Cysteine and methionine metabolism	0.467661	1.27	Cla97C02G032410.1	Malate dehydrogenase	--	1.498	6.39e-05	Up	43.6	1.142	K00026	1.06	1.061	0.659	0.658	0.7	1.024	0.986	1.012	1.175	1.297	1.228
map00270 Cysteine and methionine metabolism	0.467661	1.27	Cla97C02G043570.1	Tyrosine aminotransferase	--	0.743	3.58e-05	Down	47.1	1.513	K00815	1.341	1.62	1.067	1.088	1.057	0.789	0.784	0.815	0.608	0.75	0.578
map00270 Cysteine and methionine metabolism	0.467661	1.27	Cla97C02G043890.1	1-aminocyclopropane-1-carboxylate oxidase	--	0.498	0.000444743	Down	35.8	1.847	K05933	1.645	1.622	1.258	1.151	1.229	0.571	0.563	0.679	0.324	0.642	0.508
map00270 Cysteine and methionine metabolism	0.467661	1.27	Cla97C04G073140.1	alanine--glyoxylate aminotransferase 2 homolog 2, mitochondrial-like	--	0.749	0.00112325	Down	52	1.133	K00827	1.14	1.177	1.246	1.169	1.279	0.933	0.951	0.884	0.645	0.716	0.613
map00270 Cysteine and methionine metabolism	0.467661	1.27	Cla97C06G113030.1	Cysteine synthase	--	0.598	4.59e-06	Down	40.2	1.428	K13034	1.441	1.477	1.358	1.356	1.333	0.828	0.789	0.805	0.459	0.429	0.449
map00270 Cysteine and methionine metabolism	0.467661	1.27	Cla97C09G173910.1	1-aminocyclopropane-1-carboxylate oxidase 1	--	0.6	2.42e-05	Down	35.9	1.677	K05933	1.667	1.576	1.024	1.05	1.042	0.647	0.6	0.622	0.618	0.674	0.671
map00360 Phenylalanine metabolism	0.438256	1.54	Cla97C02G031080.1	Amidase, putative	--	1.34	5.45e-06	Up	55.3	0.721	K01426	0.677	0.72	0.818	0.824	0.842	1.113	1.112	1.104	1.253	1.387	1.333
map00360 Phenylalanine metabolism	0.438256	1.54	Cla97C02G043570.1	Tyrosine aminotransferase	--	0.743	3.58e-05	Down	47.1	1.513	K00815	1.341	1.62	1.067	1.088	1.057	0.789	0.784	0.815	0.608	0.75	0.578
map00360 Phenylalanine metabolism	0.438256	1.54	Cla97C06G113970.1	Enoyl-CoA hydratase	--	1.437	0.000220076	Up	28.7	0.605	K01692	0.532	0.679	0.901	0.875	0.933	1.293	1.348	1.251	1.219	1.233	1.146
map00380 Tryptophan metabolism	0.244267	1.75	Cla97C02G031080.1	Amidase, putative	--	1.34	5.45e-06	Up	55.3	0.721	K01426	0.677	0.72	0.818	0.824	0.842	1.113	1.112	1.104	1.253	1.387	1.333
map00380 Tryptophan metabolism	0.244267	1.75	Cla97C03G054210.1	Cytochrome P450 family 71 protein	--	1.309	0.00468384	Up	58.4	0.397	K11868	0.368	0.558	1.275	1.34	1.202	1.708	1.736	1.551	0.594	0.548	0.605
map00380 Tryptophan metabolism	0.244267	1.75	Cla97C06G113970.1	Enoyl-CoA hydratase	--	1.437	0.000220076	Up	28.7	0.605	K01692	0.532	0.679	0.901	0.875	0.933	1.293	1.348	1.251	1.219	1.233	1.146
map00460 Cyanoamino acid metabolism	0.124313	2.06	Cla97C03G063780.1	beta-glucosidase 12-like	--	0.582	0.00165487	Down	54	1.664	K01188	1.569	1.775	1.091	1.117	1.094	0.604	0.735	0.583	0.566	0.563	0.493
map00460 Cyanoamino acid metabolism	0.124313	2.06	Cla97C06G113030.1	Cysteine synthase	--	0.598	4.59e-06	Down	40.2	1.428	K13034	1.441	1.477	1.358	1.356	1.333	0.828	0.789	0.805	0.459	0.429	0.449
map00460 Cyanoamino acid metabolism	0.124313	2.06	Cla97C07G136190.1	beta-glucosidase 44-like	--	0.687	0.000178409	Down	58.2	0.946	K05350	0.96	0.944	1.376	1.374	1.283	0.895	0.941	0.935	0.855	0.918	0.824
map00460 Cyanoamino acid metabolism	0.124313	2.06	Cla97C11G208340.1	gamma-glutamyltranspeptidase 3	--	1.421	0.000353699	Up	67.2	0.612	K18592	0.636	0.613	0.848	0.852	0.877	1.284	1.219	1.16	1.241	1.265	1.354
map00480 Glutathione metabolism	0.167517	1.67	Cla97C01G002630.1	Aminopeptidase N	--	0.673	2.91e-05	Down	110.7	0.84	K01256	0.844	0.868	1.093	1.074	1.064	0.702	0.731	0.743	1.369	1.338	1.313
map00480 Glutathione metabolism	0.167517	1.67	Cla97C02G030990.1	Ascorbate peroxidase	--	1.324	2.64e-05	Up	31.5	0.685	K00434	0.716	0.731	0.974	0.943	0.959	1.25	1.289	1.268	1.034	1.02	1.012
map00480 Glutathione metabolism	0.167517	1.67	Cla97C04G079270.1	Glutathione s-transferase	--	1.674	3.25e-05	Up	27.1	0.36	K00799	0.407	0.401	0.795	0.844	0.855	1.418	1.365	1.391	1.375	1.392	1.417
map00480 Glutathione metabolism	0.167517	1.67	Cla97C09G168680.1	Glutathione S-transferase	--	0.659	0.000105737	Down	24.1	1.087	K00799	1.032	1.174	1.315	1.325	1.274	0.853	0.828	0.9	0.736	0.815	0.72
map00480 Glutathione metabolism	0.167517	1.67	Cla97C09G169470.1	Glutathione peroxidase	--	1.499	0.000171565	Up	19.1	1.075	K00432	1.005	1.012	0.649	0.639	0.637	0.931	1.019	0.936	1.363	1.337	1.304
map00480 Glutathione metabolism	0.167517	1.67	Cla97C11G208340.1	gamma-glutamyltranspeptidase 3	--	1.421	0.000353699	Up	67.2	0.612	K18592	0.636	0.613	0.848	0.852	0.877	1.284	1.219	1.16	1.241	1.265	1.354
map00500 Starch and sucrose metabolism	0.387533	1.32	Cla97C01G008790.1	Sucrose synthase	--	0.631	0.000408491	Down	95.2	0.993	K00695	0.975	0.959	0.983	0.957	0.993	0.57	0.627	0.655	1.455	1.456	1.372
map00500 Starch and sucrose metabolism	0.387533	1.32	Cla97C02G045770.1	Alpha-1,4 glucan phosphorylase	--	0.748	0.000754029	Down	95.5	0.662	K00688	0.687	0.681	1.04	1.02	1.018	0.781	0.722	0.799	1.519	1.581	1.42
map00500 Starch and sucrose metabolism	0.387533	1.32	Cla97C03G063780.1	beta-glucosidase 12-like	--	0.582	0.00165487	Down	54	1.664	K01188	1.569	1.775	1.091	1.117	1.094	0.604	0.735	0.583	0.566	0.563	0.493
map00500 Starch and sucrose metabolism	0.387533	1.32	Cla97C04G072460.1	4-alpha-glucanotransferase, putative	--	0.756	7.89e-05	Down	82.4	0.702	K00705	0.723	0.702	1.222	1.193	1.255	0.909	0.931	0.934	1.082	1.127	1.101
map00500 Starch and sucrose metabolism	0.387533	1.32	Cla97C05G099220.1	beta-fructofuranosidase, insoluble isoenzyme 1-like	--	1.363	0.000791768	Up	63.7	0.608	K01193	0.621	0.614	0.751	0.769	0.765	1.107	0.997	1.01	1.507	1.571	1.608
map00500 Starch and sucrose metabolism	0.387533	1.32	Cla97C07G136190.1	beta-glucosidase 44-like	--	0.687	0.000178409	Down	58.2	0.946	K05350	0.96	0.944	1.376	1.374	1.283	0.895	0.941	0.935	0.855	0.918	0.824
map00500 Starch and sucrose metabolism	0.387533	1.32	Cla97C09G169430.1	isoamylase 2, chloroplastic	--	0.742	6.92e-05	Down	98.1	0.773	K01214	0.731	0.844	1.115	1.111	1.116	0.799	0.834	0.847	1.279	1.284	1.274
map00500 Starch and sucrose metabolism	0.387533	1.32	Cla97C10G186050.1	Trehalose-6-phosphate synthase-8	--	0.748	0.00866718	Down	97.5	1.098	K16055	1.11	1.219	0.861	0.884	0.993	0.712	0.709	0.627	1.329	1.253	1.16
map00590 Arachidonic acid metabolism	0.0673005	3.09	Cla97C06G123370.1	Phospholipase A2 like 3	--	0.677	0.000705299	Down	17.2	1.786	K01047	1.527	1.466	1.264	1.271	1.144	0.807	0.816	0.869	0.144	0.368	0.455
map00590 Arachidonic acid metabolism	0.0673005	3.09	Cla97C09G169470.1	Glutathione peroxidase	--	1.499	0.000171565	Up	19.1	1.075	K00432	1.005	1.012	0.649	0.639	0.637	0.931	1.019	0.936	1.363	1.337	1.304
map00590 Arachidonic acid metabolism	0.0673005	3.09	Cla97C11G208340.1	gamma-glutamyltranspeptidase 3	--	1.421	0.000353699	Up	67.2	0.612	K18592	0.636	0.613	0.848	0.852	0.877	1.284	1.219	1.16	1.241	1.265	1.354
map00591 Linoleic acid metabolism	0.068233	4.46	Cla97C06G123370.1	Phospholipase A2 like 3	--	0.677	0.000705299	Down	17.2	1.786	K01047	1.527	1.466	1.264	1.271	1.144	0.807	0.816	0.869	0.144	0.368	0.455
map00591 Linoleic acid metabolism	0.068233	4.46	Cla97C11G218970.1	Cytochrome P450	--	1.448	0.0248823	Up	64.4		K07424	0.455	0.611		0.623	0.677		0.981	0.901		1.941	1.812
map00592 alpha-Linolenic acid metabolism	0.040017	2.57	Cla97C02G036270.1	Acyl-coenzyme A oxidase	--	1.412	4.36e-05	Up	76.5	0.534	K00232	0.451	0.503	0.83	0.824	0.86	1.183	1.208	1.158	1.467	1.49	1.495
map00592 alpha-Linolenic acid metabolism	0.040017	2.57	Cla97C05G084200.1	3-ketoacyl-CoA thiolase 2, peroxisomal	--	1.893	8.3e-07	Up	48.4	0.456	K07513	0.405	0.425	0.708	0.687	0.701	1.339	1.328	1.301	1.489	1.518	1.577
map00592 alpha-Linolenic acid metabolism	0.040017	2.57	Cla97C06G123370.1	Phospholipase A2 like 3	--	0.677	0.000705299	Down	17.2	1.786	K01047	1.527	1.466	1.264	1.271	1.144	0.807	0.816	0.869	0.144	0.368	0.455
map00592 alpha-Linolenic acid metabolism	0.040017	2.57	Cla97C11G214710.1	Lecithin:cholesterol acyltransferase 3	--	1.493	0.000692289	Up	50.5	0.893	K22389	0.761	0.776	0.723	0.701	0.737	1.064	1.155	1.008	1.381	1.384	1.479
map00592 alpha-Linolenic acid metabolism	0.040017	2.57	Cla97C11G214950.1	12-oxophytodienoate reductase	--	0.703	0.0257357	Down	41.8	1.158	K05894	1.759	1.396	1.132	1.211	1.168	0.948	0.669	0.85	0.762	0.361	0.587
map00710 Carbon fixation in photosynthetic organisms	0.0587435	1.98	Cla97C02G032410.1	Malate dehydrogenase	--	1.498	6.39e-05	Up	43.6	1.142	K00026	1.06	1.061	0.659	0.658	0.7	1.024	0.986	1.012	1.175	1.297	1.228
map00710 Carbon fixation in photosynthetic organisms	0.0587435	1.98	Cla97C05G094190.1	Glyceraldehyde-3-phosphate dehydrogenase	--	1.444	0.0118646	Up	42.8	1.197	K05298	1.157	1.229	0.638	0.71	0.844	1.08	1.083	1.003	1.085	1.048	0.999
map00710 Carbon fixation in photosynthetic organisms	0.0587435	1.98	Cla97C05G103110.1	Malate dehydrogenase	--	1.502	2.01e-05	Up	48	0.579	K00051	0.61	0.524	0.842	0.862	0.826	1.296	1.263	1.242	1.304	1.303	1.334
map00710 Carbon fixation in photosynthetic organisms	0.0587435	1.98	Cla97C05G104530.1	Ribulose bisphosphate carboxylase small chain	--	1.617	0.000123396	Up	20.7	1.548	K01602	1.422	1.395	0.629	0.699	0.652	1.085	1.047	1.069	0.799	0.866	0.836
map00710 Carbon fixation in photosynthetic organisms	0.0587435	1.98	Cla97C07G132400.1	Sedoheptulose-1,7-bisphosphatase	--	2.23	2.19e-06	Up	41.9	0.522	K01100	0.683	0.661	0.621	0.653	0.636	1.457	1.408	1.394	1.399	1.288	1.309
map00710 Carbon fixation in photosynthetic organisms	0.0587435	1.98	Cla97C10G185800.1	Phosphoribulokinase	--	1.421	0.00340737	Up	45.4	0.921	K00855	0.918	0.873	0.808	0.824	0.959	1.242	1.256	1.185	0.983	0.979	0.983
map00710 Carbon fixation in photosynthetic organisms	0.0587435	1.98	Cla97C11G210620.1	Fructose-bisphosphate aldolase	--	1.929	1.09e-05	Up	42.8	1.046	K01623	1.029	1.089	0.649	0.673	0.691	1.255	1.305	1.324	1.032	0.951	0.943
map00710 Carbon fixation in photosynthetic organisms	0.0587435	1.98	Cla97C07G130520.1	Phosphoribulokinase	--	1.344	0.0203769	Up	46.2		K00855	1.061	1.216		0.741	0.798		1.012	1.057		1.187	1.035
map00750 Vitamin B6 metabolism	0.0333043	4.01	Cla97C02G045540.1	Pyridoxal biosynthesis protein PDX1-like protein	--	1.49	1.73e-05	Up	33.4	0.981	K06215	0.823	0.84	0.751	0.759	0.778	1.149	1.153	1.108	1.144	1.279	1.286
map00750 Vitamin B6 metabolism	0.0333043	4.01	Cla97C10G205390.1	Pyridoxal biosynthesis protein PDX1.3	--	1.569	1.24e-06	Up	32.9	0.75	K06215	0.728	0.734	0.768	0.754	0.745	1.177	1.19	1.191	1.265	1.341	1.341
map00750 Vitamin B6 metabolism	0.0333043	4.01	Cla97C03G066050.1	inorganic pyrophosphatase 3	--	0.433	0.0088413	Down	26.2		K13248	1.608	1.792		1.356	1.307		0.532	0.621		0.505	0.28
map00908 Zeatin biosynthesis	0.0301491	6.69	Cla97C04G070610.1	Glycosyltransferase	--	0.641	0.00546178	Down	53.5	1.004	K13495	0.996	1.054	1.585	1.235	1.354	0.892	0.945	0.838	0.549	0.824	0.69
map00908 Zeatin biosynthesis	0.0301491	6.69	Cla97C10G202910.1	Glycosyltransferase	--	1.486	0.00168011	Up	54.5	0.772	K13496	0.704	0.857	0.904	0.831	0.922	1.423	1.288	1.236	0.9	0.976	0.985
map00910 Nitrogen metabolism	0.366696	1.57	Cla97C04G071880.1	Glutamate dehydrogenase	--	0.744	5.85e-05	Down	44.5	1.329	K00261	1.234	1.377	1.151	1.208	1.17	0.873	0.889	0.863	0.601	0.635	0.633
map00910 Nitrogen metabolism	0.366696	1.57	Cla97C05G107480.1	Carbonic anhydrase	--	1.415	1.39e-05	Up	30.1	0.413	K01673	0.431	0.382	0.941	0.904	0.92	1.313	1.286	1.314	1.299	1.331	1.301
map00940 Phenylpropanoid biosynthesis	0.15094	1.62	Cla97C01G018700.1	Glycosyltransferase	--	1.355	0.0010261	Up	52.5	0.49	K12356	0.747	0.733	0.845	0.829	0.877	1.223	1.133	1.101	1.421	1.338	1.217
map00940 Phenylpropanoid biosynthesis	0.15094	1.62	Cla97C03G063780.1	beta-glucosidase 12-like	--	0.582	0.00165487	Down	54	1.664	K01188	1.569	1.775	1.091	1.117	1.094	0.604	0.735	0.583	0.566	0.563	0.493
map00940 Phenylpropanoid biosynthesis	0.15094	1.62	Cla97C05G098800.1	Peroxidase	--	0.763	0.0424065	Down	35.8	1.568	K00430	2.016	1.991	0.907	0.923	0.901	0.832	0.622	0.631	0.69	0.527	0.481
map00940 Phenylpropanoid biosynthesis	0.15094	1.62	Cla97C07G136190.1	beta-glucosidase 44-like	--	0.687	0.000178409	Down	58.2	0.946	K05350	0.96	0.944	1.376	1.374	1.283	0.895	0.941	0.935	0.855	0.918	0.824
map00940 Phenylpropanoid biosynthesis	0.15094	1.62	Cla97C09G177300.1	Peroxidase	--	2.104	0.000505419	Up	36.2	0.714	K00430	0.754	0.739	0.645	0.771	0.757	1.619	1.393	1.559	1.091	1.035	1.029
map00940 Phenylpropanoid biosynthesis	0.15094	1.62	Cla97C10G193130.1	caffeoylshikimate esterase	--	0.743	0.0103452	Down	36.5	0.882	K18368	0.787	0.691	1.329	1.43	1.453	1.118	0.924	1.089	0.717	0.758	0.767
map00940 Phenylpropanoid biosynthesis	0.15094	1.62	Cla97C10G197400.1	Peroxidase	--	0.696	0.000117127	Down	35.9	1.321	K00430	1.259	1.253	1.298	1.269	1.232	0.849	0.893	0.903	0.56	0.592	0.577
map00940 Phenylpropanoid biosynthesis	0.15094	1.62	Cla97C11G219650.1	Caffeoyl-CoA 3-O-methyltransferase	--	1.336	0.00037008	Up	26.5	0.449	K00588	0.734	0.6	0.956	0.973	0.92	1.313	1.267	1.225	1.19	1.043	1.184
map01040 Biosynthesis of unsaturated fatty acids	0.12884	2.36	Cla97C02G036270.1	Acyl-coenzyme A oxidase	--	1.412	4.36e-05	Up	76.5	0.534	K00232	0.451	0.503	0.83	0.824	0.86	1.183	1.208	1.158	1.467	1.49	1.495
map01040 Biosynthesis of unsaturated fatty acids	0.12884	2.36	Cla97C05G084200.1	3-ketoacyl-CoA thiolase 2, peroxisomal	--	1.893	8.3e-07	Up	48.4	0.456	K07513	0.405	0.425	0.708	0.687	0.701	1.339	1.328	1.301	1.489	1.518	1.577
map01040 Biosynthesis of unsaturated fatty acids	0.12884	2.36	Cla97C10G200350.1	Fatty acid desaturase 2	--	0.726	0.017011	Down	44	2.319	K10256	2.548	2.575	0.697	0.608	0.664	0.545	0.456	0.429	0.438	0.444	0.358
map01212 Fatty acid metabolism	0.0899894	1.91	Cla97C02G036270.1	Acyl-coenzyme A oxidase	--	1.412	4.36e-05	Up	76.5	0.534	K00232	0.451	0.503	0.83	0.824	0.86	1.183	1.208	1.158	1.467	1.49	1.495
map01212 Fatty acid metabolism	0.0899894	1.91	Cla97C05G084200.1	3-ketoacyl-CoA thiolase 2, peroxisomal	--	1.893	8.3e-07	Up	48.4	0.456	K07513	0.405	0.425	0.708	0.687	0.701	1.339	1.328	1.301	1.489	1.518	1.577
map01212 Fatty acid metabolism	0.0899894	1.91	Cla97C05G086550.1	Long chain acyl-CoA synthetase 7	--	1.311	4.04e-06	Up	76.3	0.66	K01897	0.561	0.545	0.909	0.902	0.902	1.171	1.201	1.184	1.341	1.323	1.319
map01212 Fatty acid metabolism	0.0899894	1.91	Cla97C06G113970.1	Enoyl-CoA hydratase	--	1.437	0.000220076	Up	28.7	0.605	K01692	0.532	0.679	0.901	0.875	0.933	1.293	1.348	1.251	1.219	1.233	1.146
map01212 Fatty acid metabolism	0.0899894	1.91	Cla97C07G141980.1	long chain acyl-CoA synthetase 4-like	--	0.665	6.52e-05	Down	73.8	1.016	K01897	1.088	0.992	1.072	1.043	1.078	0.704	0.683	0.735	1.111	1.187	1.196
map01212 Fatty acid metabolism	0.0899894	1.91	Cla97C10G200350.1	Fatty acid desaturase 2	--	0.726	0.017011	Down	44	2.319	K10256	2.548	2.575	0.697	0.608	0.664	0.545	0.456	0.429	0.438	0.444	0.358
map01212 Fatty acid metabolism	0.0899894	1.91	Cla97C11G221760.1	Long-chain acyl-CoA synthetase 4	--	0.717	0.000402779	Down	75.9	0.925	K01897	0.81	0.895	1.11	1.204	1.174	0.864	0.811	0.826	1.133	1.105	1.127
map03010 Ribosome	0.0396685	1.61	Cla97C03G060110.1	60S ribosomal protein L30-like	--	0.768	0.00142508	Down	12.4	1.258	K02908	1.424	1.159	1.11	1.034	1.12	0.837	0.803	0.867	0.795	0.739	0.853
map03010 Ribosome	0.0396685	1.61	Cla97C04G075480.1	60S ribosomal protein L4-like	--	1.5	0.00041118	Up	44.6	1.556	K02930	1.525	1.71	0.698	0.671	0.684	1.089	0.963	1.027	0.733	0.785	0.679
map03010 Ribosome	0.0396685	1.61	Cla97C04G076500.1	60S ribosomal protein L24	--	0.662	0.0212303	Down	18.6	1.889	K02896		1.66	0.971		1.055	0.641		0.701	0.5		0.583
map03010 Ribosome	0.0396685	1.61	Cla97C05G102190.1	40S ribosomal protein S29, putative, expressed	--	0.574	7.84e-05	Down	43.7	0.989	K02980	0.991	0.892	1.537	1.555	1.638	0.919	0.857	0.938	0.554	0.597	0.531
map03010 Ribosome	0.0396685	1.61	Cla97C05G106450.1	40S ribosomal protein S9-2	--	0.769	0.0316965	Down	23	1.154	K02997	1.189	1.148	0.931	0.911	0.969	0.646	0.677	0.84	1.166	1.205	1.002
map03010 Ribosome	0.0396685	1.61	Cla97C07G132330.1	60S ribosomal protein L35a-1	--	0.756	0.000498919	Down	12.9	1.107	K02917	1.097	1.114	1.12	1.083	1.128	0.799	0.86	0.858	0.916	0.851	0.894
map03010 Ribosome	0.0396685	1.61	Cla97C07G132970.1	40S ribosomal protein S4	--	0.736	0.0266542	Down	29.8	1.246	K02987	1.129	1.251	0.831	1.007	0.907	0.583	0.733	0.705	1.34	1.131	1.199
map03010 Ribosome	0.0396685	1.61	Cla97C07G135120.1	40S ribosomal protein S10-1-like	--	0.661	3.81e-05	Down	20	1.501	K02947	1.447	1.438	1.253	1.276	1.231	0.828	0.803	0.855	0.334	0.411	0.405
map03010 Ribosome	0.0396685	1.61	Cla97C07G140420.1	60S ribosomal protein L28-2-like	--	0.594	9.73e-05	Down	16.7	1.181	K02903	1.153	1.081	1.561	1.57	1.494	0.895	0.881	0.969	0.404	0.407	0.531
map03010 Ribosome	0.0396685	1.61	Cla97C08G146130.1	60S ribosomal protein L3	--	1.417	0.00677633	Up	44.4	1.364	K02925	1.38	1.302	0.719	0.705	0.688	0.937	1.132	0.923	0.931	0.968	1.044
map03010 Ribosome	0.0396685	1.61	Cla97C08G152190.1	50S ribosomal protein L21, related protein	--	0.74	3.93e-05	Down	30	1.818	K02888	1.743	1.927	0.95	0.987	0.992	0.724	0.73	0.713	0.571	0.558	0.368
map03010 Ribosome	0.0396685	1.61	Cla97C08G156880.1	40S ribosomal protein S11	--	0.658	2.75e-05	Down	17.8	1.343	K02949	1.475	1.284	1.259	1.283	1.28	0.852	0.808	0.856	0.542	0.434	0.679
map03010 Ribosome	0.0396685	1.61	Cla97C09G166870.1	60S ribosomal protein L44-like	--	0.53	0.000522523	Down	12	1.194	K02929	1.254	1.112	1.613	1.438	1.319	0.741	0.796	0.779	0.453	0.511	0.354
map03010 Ribosome	0.0396685	1.61	Cla97C09G173210.1	40S ribosomal protein S4	--	0.736	0.00946005	Down	29.8	1.168	K02987	1.205		0.864	0.908		0.663	0.641		1.213	1.218
map03010 Ribosome	0.0396685	1.61	Cla97C10G203840.1	60S ribosomal protein L4-like	--	1.383	0.000869504	Up	44.6	1.59	K02930	1.436	1.418	0.783	0.796	0.713	1.072	1.031	1.067	0.48	0.491	0.562
map03010 Ribosome	0.0396685	1.61	Cla97C11G214200.1	Ribulose bisphosphate carboxylase large chain	--	1.82	0.000903124	Up	46.7	0.9	K02878	0.983	0.987	0.509	0.588	0.639	1.041	1.033	1.085	1.55	1.396	1.29
map03010 Ribosome	0.0396685	1.61	Cla97C11G219700.1	60S ribosomal protein L17-2	--	0.739	0.00647246	Down	20.6	1.242	K02880	1.227	1.322	1.176	1.407	1.218	0.969	0.919	0.92	0.331	0.448	0.54
map03010 Ribosome	0.0396685	1.61	Cla97C07G142650.1	40S ribosomal protein S8	--	1.548	0.0373793	Up	25		K02995	1.56	1.065		0.819	0.843		1.395	1.177		0.226	0.88
map03010 Ribosome	0.0396685	1.61	Cla97C08G154200.1	40S ribosomal protein S6	--	1.461	0.0123999	Up	28.3		K02991	1.486	1.436		0.817	0.808		1.137	1.237		0.525	0.541
map03040 Spliceosome	0.356724	1.3	Cla97C01G018870.1	U1 small nuclear ribonucleoprotein 70 kDa	--	0.663	0.00718953	Down	60.7	1.229	K11093	1.633	1.67	0.943	1.091	1.102	0.776	0.681	0.622	1.15	0.596	0.606
map03040 Spliceosome	0.356724	1.3	Cla97C03G062650.1	Serine/arginine-rich splicing factor SC35	--	1.545	0.000120092	Up	33.1	0.837	K12900	0.817	0.884	0.752	0.696	0.749	1.133	1.16	1.101	1.268	1.327	1.252
map03040 Spliceosome	0.356724	1.3	Cla97C03G067680.1	Arginine/serine-rich splicing factor, putative	--	1.702	0.000204094	Up	45.2	0.41	K12890	0.603	0.404	0.694	0.753	0.703	1.288	1.152	1.219	1.608	1.492	1.673
map03040 Spliceosome	0.356724	1.3	Cla97C04G075000.1	Heat shock 70 kDa protein 4	--	0.668	0.00013026	Down	70.8	0.977	K03283	0.959	0.984	1.201	1.144	1.217	0.761	0.807	0.811	1.017	0.985	0.981
map03040 Spliceosome	0.356724	1.3	Cla97C05G093540.1	THO complex subunit 4D	--	1.636	0.000219048	Up	30.9	1.236	K12881	1.177	1.226	0.658	0.731	0.664	1.16	1.087	1.111	0.963	1.099	1.054
map03040 Spliceosome	0.356724	1.3	Cla97C07G136230.1	apoptotic chromatin condensation inducer in the nucleus	--	1.514	8.2e-05	Up	48.1	1.347	K12875	1.457	1.349	0.7	0.669	0.693	1.013	1.085	1.024	0.891	0.85	0.997
map03040 Spliceosome	0.356724	1.3	Cla97C09G168380.1	Arginine/serine-rich splicing factor, putative	--	1.458	0.000283377	Up	32.1	0.938	K12890	0.948	0.92	0.709	0.744	0.79	1.081	1.089	1.1	1.219	1.219	1.231
map03040 Spliceosome	0.356724	1.3	Cla97C09G170390.1	ATP-dependent RNA helicase, putative	--	0.683	0.014864	Down	162	1.445	K12815	1.627		1.191	1.137		0.828	0.763		0.536	0.474
map03040 Spliceosome	0.356724	1.3	Cla97C10G200740.1	Serine/arginine-rich splicing factor SC35	--	1.529	0.00702831	Up	25.2	0.601	K12900	0.498	0.556	0.913	0.694	0.778	1.152	1.27	1.224	1.334	1.538	1.442
map03040 Spliceosome	0.356724	1.3	Cla97C11G217390.1	Heat shock 70 kDa protein	--	1.472	6.19e-06	Up	71	0.467	K03283	0.455	0.468	0.558	0.553	0.57	0.819	0.839	0.817	2.22	2.108	2.132
map03040 Spliceosome	0.356724	1.3	Cla97C01G006990.1	THO complex subunit 2	--	1.391	0.047312	Up	213.2		K12879	1.689	1.766		0.672	0.677		1.007	0.869		0.632	0.688
map04141 Protein processing in endoplasmic reticulum	0.00234016	2.03	Cla97C01G008920.1	17.4 kDa class I heat shock protein 3	--	2.249	3.52e-05	Up	15.9	0.377	K13993	0.381	0.297	0.658	0.693	0.612	1.485	1.422	1.508	1.373	1.442	1.45
map04141 Protein processing in endoplasmic reticulum	0.00234016	2.03	Cla97C01G024750.1	endoplasmic reticulum oxidoreductin-1-like	--	0.746	0.00606604	Down	52.3	0.464	K10950	0.426	0.445	1.381	1.329	1.222	0.909	1.051	0.973	1.247	1.194	1.36
map04141 Protein processing in endoplasmic reticulum	0.00234016	2.03	Cla97C02G033390.1	22.0 kDa class IV heat shock protein-like	--	1.62	9.71e-05	Up	24.2	0.464	K13993	0.44	0.49	0.505	0.484	0.536	0.824	0.811	0.836	2.181	2.199	2.15
map04141 Protein processing in endoplasmic reticulum	0.00234016	2.03	Cla97C02G040810.1	calreticulin	--	0.652	2.44e-05	Down	49.8	1.877	K08057	1.877	1.847	0.819	0.858	0.864	0.553	0.561	0.543	0.728	0.69	0.693
map04141 Protein processing in endoplasmic reticulum	0.00234016	2.03	Cla97C03G051930.1	18.5 kDa class I heat shock protein-like	--	2.19	0.000205635	Up	18.2	0.543	K13993	0.409	0.452	0.683	0.571	0.669	1.347	1.454	1.41	1.427	1.565	1.469
map04141 Protein processing in endoplasmic reticulum	0.00234016	2.03	Cla97C03G051940.1	17.5 kDa class I heat shock protein-like	--	1.326	0.00440018	Up	16.5	0.987	K13993	0.773	0.982	0.859	0.863	0.931	1.176	1.253	1.088	0.923	1.111	0.999
map04141 Protein processing in endoplasmic reticulum	0.00234016	2.03	Cla97C04G071950.1	Heat-shock protein, putative	--	1.786	3.63e-05	Up	23.6	0.619	K13993	0.645	0.659	0.721	0.74	0.791	1.337	1.363	1.323	1.318	1.297	1.209
map04141 Protein processing in endoplasmic reticulum	0.00234016	2.03	Cla97C04G075000.1	Heat shock 70 kDa protein 4	--	0.668	0.00013026	Down	70.8	0.977	K03283	0.959	0.984	1.201	1.144	1.217	0.761	0.807	0.811	1.017	0.985	0.981
map04141 Protein processing in endoplasmic reticulum	0.00234016	2.03	Cla97C05G080230.1	Protein transport protein Sec61 subunit beta	--	0.764	0.0223222	Down	12.9	1.425	K09481	1.469	1.408	1.083	1.129	0.949	0.722	0.851	0.841	0.77	0.551	0.802
map04141 Protein processing in endoplasmic reticulum	0.00234016	2.03	Cla97C05G094650.1	18.1 kDa class I heat shock protein-like	--	1.462	0.0472723	Up	16	0.338	K13993	0.483	0.601	0.461	0.621	0.745	0.869	0.885	0.917	2.332	2.041	1.738
map04141 Protein processing in endoplasmic reticulum	0.00234016	2.03	Cla97C05G099440.1	17.3 kDa class ii heat shock protein	--	1.991	0.0038793	Up	17.4	0.571	K13993	0.62	0.413	0.632	0.64	0.448	1.148	1.131	1.146	1.707	1.573	1.997
map04141 Protein processing in endoplasmic reticulum	0.00234016	2.03	Cla97C05G108440.1	Heat shock protein, putative	--	1.381	0.0355961	Up	26.3	0.864	K13993	0.79	0.691	0.643	0.867	0.896	1.08	1.099	1.144	1.413	1.244	1.269
map04141 Protein processing in endoplasmic reticulum	0.00234016	2.03	Cla97C06G114750.1	cullin-1	--	0.732	0.00378047	Down	86.7	0.959	K03347	0.899	0.901	1.041	1.055	1.113	0.712	0.833	0.805	1.17	1.207	1.122
map04141 Protein processing in endoplasmic reticulum	0.00234016	2.03	Cla97C07G132190.1	17.8 kDa class I heat shock protein-like	--	2.689	0.000700051	Up	18.1	0.416	K13993	0.387	0.619	0.402	0.436	0.564	1.31	1.268	1.192	1.839	1.899	1.68
map04141 Protein processing in endoplasmic reticulum	0.00234016	2.03	Cla97C08G145950.1	22.0 kDa class IV heat shock protein	--	1.695	0.00482718	Up	21.6	0.487	K13993	0.562	0.434	0.439	0.594	0.467	0.879	0.848	0.815	2.195	1.961	2.283
map04141 Protein processing in endoplasmic reticulum	0.00234016	2.03	Cla97C10G187290.1	Heat-shock protein, putative	--	1.753	0.000691063	Up	23.5	0.512	K13993	0.497	0.606	0.745	0.792	0.868	1.487	1.426	1.302	1.256	1.285	1.223
map04141 Protein processing in endoplasmic reticulum	0.00234016	2.03	Cla97C11G217390.1	Heat shock 70 kDa protein	--	1.472	6.19e-06	Up	71	0.467	K03283	0.455	0.468	0.558	0.553	0.57	0.819	0.839	0.817	2.22	2.108	2.132
map04141 Protein processing in endoplasmic reticulum	0.00234016	2.03	Cla97C04G074210.1	18.1 kDa class I heat shock protein-like	--	1.898	0.00310531	Up	15.9		K13993	0.715	0.679		0.571	0.562		1.038	1.113		1.496	1.654
map04141 Protein processing in endoplasmic reticulum	0.00234016	2.03	Cla97C07G132310.1	17.8 kDa class I heat shock protein-like	--	3.252	0.0141095	Up	17.6		K13993	0.315	0.366		0.3	0.399		1.128	1.145		2.257	2.09
map04146 Peroxisome	0.0899894	1.91	Cla97C02G036270.1	Acyl-coenzyme A oxidase	--	1.412	4.36e-05	Up	76.5	0.534	K00232	0.451	0.503	0.83	0.824	0.86	1.183	1.208	1.158	1.467	1.49	1.495
map04146 Peroxisome	0.0899894	1.91	Cla97C03G063500.1	Xanthine dehydrogenase, putative	--	0.75	0.000232159	Down	150.6	0.539	K00106	0.599	0.682	1.056	1.115	1.045	0.818	0.788	0.807	1.493	1.424	1.429
map04146 Peroxisome	0.0899894	1.91	Cla97C05G084200.1	3-ketoacyl-CoA thiolase 2, peroxisomal	--	1.893	8.3e-07	Up	48.4	0.456	K07513	0.405	0.425	0.708	0.687	0.701	1.339	1.328	1.301	1.489	1.518	1.577
map04146 Peroxisome	0.0899894	1.91	Cla97C05G086550.1	Long chain acyl-CoA synthetase 7	--	1.311	4.04e-06	Up	76.3	0.66	K01897	0.561	0.545	0.909	0.902	0.902	1.171	1.201	1.184	1.341	1.323	1.319
map04146 Peroxisome	0.0899894	1.91	Cla97C07G141980.1	long chain acyl-CoA synthetase 4-like	--	0.665	6.52e-05	Down	73.8	1.016	K01897	1.088	0.992	1.072	1.043	1.078	0.704	0.683	0.735	1.111	1.187	1.196
map04146 Peroxisome	0.0899894	1.91	Cla97C07G143450.1	Acetolactate synthase	--	0.76	3.67e-05	Down	61.9	1.395	K12261	1.355	1.435	1.107	1.075	1.08	0.842	0.813	0.823	0.647	0.716	0.693
map04146 Peroxisome	0.0899894	1.91	Cla97C11G221760.1	Long-chain acyl-CoA synthetase 4	--	0.717	0.000402779	Down	75.9	0.925	K01897	0.81	0.895	1.11	1.204	1.174	0.864	0.811	0.826	1.133	1.105	1.127
map04626 Plant-pathogen interaction	0.277762	1.54	Cla97C02G026440.1	Calcium-dependent protein kinase	--	0.756	0.0111981	Down	56.2	1.15	K13412	1.148	1.147	0.931	0.884	0.803	0.713	0.609	0.657	1.314	1.333	1.377
map04626 Plant-pathogen interaction	0.277762	1.54	Cla97C02G034010.1	pathogenesis-related protein 1-like	--	1.409	0.000107748	Up	18.1	0.329	K13449	0.388	0.453	1.039	1.04	1.024	1.445	1.518	1.409	1.089	1.126	1.081
map04626 Plant-pathogen interaction	0.277762	1.54	Cla97C02G038500.1	Calcium binding family protein	--	0.722	0.00785519	Down	16	1.848	K13448	2.225	2.104	0.881	0.815	0.834	0.671	0.541	0.615	0.6	0.418	0.447
map04626 Plant-pathogen interaction	0.277762	1.54	Cla97C08G159400.1	Calcium-binding EF-hand family protein, putative	--	0.658	0.00325908	Down	18.5	1.142	K13448	1.098	1.117	1.33	1.604	1.322	0.916	0.967	0.917	0.566	0.395	0.632
map04626 Plant-pathogen interaction	0.277762	1.54	Cla97C10G189620.1	calcium-dependent protein kinase 2-like	--	0.75	0.000115855	Down	58.4	0.942	K13412	1.007	0.971	1.024	1.034	1.003	0.748	0.791	0.757	1.246	1.235	1.2
map04626 Plant-pathogen interaction	0.277762	1.54	Cla97C05G093380.1	Calcium binding protein	--	1.726	0.00219823	Up	17.3		K13448	0.808	0.846		0.705	0.731		1.262	1.217		1.225	1.206
