# Supplementary material for: Quantitative Transcriptomic and Proteomic Analysis of Fruit Development and Ripening in Watermelon (Citrullus lanatus)
Source: Front Plant Sci. 2022 Mar 22;13:818392. doi: 10.3389/fpls.2022.818392 (PMC8980866; doi:10.3389/fpls.2022.818392)
Supplement: Supplementary file 11 [file Table_10.XLS]

## Sheet: Table_10
Transcript.ID	Protein.ID	10DAP_1.x	10DAP_2.x	10DAP_3.x	18DAP_1.x	18DAP_2.x	18DAP_3.x	26DAP_1.x	26DAP_2.x	26DAP_3.x	34DAP_1.x	34DAP_2.x	34DAP_3.x	10DAP_1.y	10DAP_2.y	10DAP_3.y	18DAP_1.y	18DAP_2.y	18DAP_3.y	26DAP_1.y	26DAP_2.y	26DAP_3.y	34DAP_1.y	34DAP_2.y	34DAP_3.y	cor	type	ID
Cla97C00G000020	Cla97C00G000020.1	0.123702	0.0911585	-0.00231667	-0.0140699	-0.0804818	0.0136892	0.112935	0.129055	0.0911585	-0.242128	-0.00965118	-0.213051	-0.297859	-0.311896	-0.214877	-0.0591882	-0.0581509	-0.0772886	0.127732	0.107042	0.133762	0.209348	0.214771	0.226604	-0.443247	negative	1
Cla97C00G000130	Cla97C00G000130.1	-0.309394	-0.212253	-0.230825	0.226906	0.164968	0.21448	0.148079	0.0688413	0.123033	-0.10402	0.0110976	-0.100911	-0.715372	-0.6654	-0.539891	0.0750148	0.113623	0.0928328	0.272623	0.238135	0.294546	0.266091	0.290206	0.277592	0.719385	positive	2
Cla97C00G000150	Cla97C00G000150.1	-0.380721	-0.407616	-0.433047	0.0989849	0.138034	0.111217	0.238101	0.241814	0.233134	0.0103273	0.0811313	0.0686403	-0.860254	-0.884494	-0.797856	0.471953	0.52536	0.474803	0.270105	0.29171	0.297873	0.0962606	0.0597348	0.0548058	0.942705	positive	3
Cla97C00G000300	Cla97C00G000300.1	0.684128	0.629863	0.617965	0.038964	-0.0819771	-0.0109717	0.114303	0.0330024	0.181866	-0.940362	-0.471366	-0.795414	-0.189471	-0.197144	-0.223375	0.0490091	0.0772853	0.0427521	-0.00618734	0.00159546	-0.0101826	0.172712	0.160235	0.12277	-0.929298	negative	4
Cla97C00G000310	Cla97C00G000310.1	0.239766	0.234834	0.111098	-0.11107	-0.254551	-0.223672	0.0194237	0.0962181	0.199827	-0.136409	-0.0954561	-0.0800095	-0.169924	0.0751663	-0.208023	-0.273156	-0.260614	-0.345569	0.169158	0.092718	0.0852601	0.357617	0.200561	0.276806	0.145655	positive	5
Cla97C00G000440	Cla97C00G000440.1	-0.43774	-0.583364	-0.170095	0.716712	0.748899	0.627872	0.459601	0.503544	0.456164	-0.72701	-0.745355	-0.84923	-0.325856	-0.235095	-0.229318	0.583813	0.592791	0.61414	-0.00435079	0.10522	0.0619343	-0.435046	-0.350477	-0.377753	0.905058	positive	6
Cla97C01G000010	Cla97C01G000010.1	0.0904287	0.150578	0.0767147	-0.0231162	-0.261844	-0.0989055	0.082216	0.0586895	-0.00258974	-0.074217	0.00900988	-0.00696376	-0.946863	-0.845648	-0.994089	0.258598	0.23218	0.181527	0.400579	0.312611	0.395663	0.336029	0.329892	0.33952	-0.512669	negative	7
Cla97C01G000040	Cla97C01G000040.1	-0.341881	-0.416273	-0.379552	0.1026	0.12564	0.17325	0.0283119	0.0750143	0.0833455	0.229383	0.177147	0.143014	0.062708	0.0487838	0.130234	0.072658	0.0696996	0.0992904	-0.115423	-0.0312474	-0.0511081	-0.0934568	-0.0952317	-0.0969062	-0.519614	negative	8
Cla97C01G000050	Cla97C01G000050.1	0.0824183	0.0182259	0.162072	0.0905845	0.105437	0.0769484	0.0310121	-0.0135147	-0.175439	-0.271598	-0.110032	0.0038849	0.0554751	0.0532618	0.0351765	0.0673127	-0.130158	-0.0199914	0.0739757	0.0267531	0.0131528	-0.158606	0.0230302	-0.0393818	0.400461	positive	9
Cla97C01G000120	Cla97C01G000120.1	0.0505985	-0.12318	-0.0508375	-0.182797	-0.151875	-0.115309	0.108204	0.249004	0.225645	0.0322917	0.0166179	-0.0583633	-0.496896	-0.387193	-0.511684	0.112396	0.182911	0.138888	0.103241	0.117393	0.220252	0.141039	0.207067	0.172587	0.163525	positive	12
Cla97C01G000130	Cla97C01G000130.1	0.244502	0.147289	0.324216	-0.101122	-0.0693137	-0.0440677	-0.114972	-0.0396581	-0.0904414	-0.0738151	-0.0738151	-0.1088	-0.199149	-0.276271	-0.177263	-0.0340826	0.0225282	-0.0532445	0.0193329	0.0501814	0.0588105	0.183357	0.193027	0.212773	-0.776511	negative	13
Cla97C01G000170	Cla97C01G000170.1	0.101931	0.151614	0.133016	0.356745	0.341782	-0.0355728	0.0204326	0.0645639	0.0882037	-0.520399	-0.640967	-0.0613494	0.30868	0.341361	0.266565	0.261048	0.14914	0.25098	-0.0828632	-0.10485	-0.129465	-0.441022	-0.439935	-0.379639	0.76982	positive	14
Cla97C01G000200	Cla97C01G000200.1	-0.0575079	-0.0159886	-0.0365989	0.0705281	0.0497297	0.0594729	0.0923876	0.0328723	0.0566959	-0.0987087	-0.0802518	-0.0726306	-0.0571449	-0.0492277	-0.0665114	0.842595	0.741707	0.801712	0.00162002	-0.0861729	-0.113613	-0.741114	-0.619083	-0.654765	0.766809	positive	15
Cla97C01G000230	Cla97C01G000230.1	0.428409	0.432893	0.472633	-0.0646728	-0.021093	-0.048957	0.192292	0.22239	0.214598	-0.581731	-0.557069	-0.68969	0.0253522	0.0311683	0.0236295	0.287849	0.290337	0.305739	-0.000298626	-0.0970155	-0.0930269	-0.343018	-0.233817	-0.196899	0.439074	positive	16
Cla97C01G000240	Cla97C01G000240.1	0.104772	0.124874	0.325814	-0.0294966	-0.0339471	-0.00162469	0.0483499	-0.154758	-0.119647	-0.114924	0.0816444	-0.231056	-1.05046	-1.02208	-1.07305	0.0330188	0.034796	0.0138485	0.388286	0.332993	0.35807	0.680009	0.634463	0.670098	-0.758581	negative	17
Cla97C01G000270	Cla97C01G000270.1	0.666214	0.551052	0.547975	-0.0120471	0.014948	-0.0581926	-0.434674	-0.351873	-0.244821	-0.248384	-0.239494	-0.190703	0.369744	0.391067	0.435956	0.0441493	0.0944544	0.0731308	-0.156319	-0.111259	-0.140464	-0.300924	-0.344272	-0.355262	0.898304	positive	18
Cla97C01G000300	Cla97C01G000300.1	-0.173425	-0.330338	0.040305	0.00175474	-0.00695371	-0.0142511	0.156649	0.148829	-0.078581	0.0204446	0.161839	0.073728	-0.688361	-0.494304	-0.623296	0.0205519	0.0597811	-0.0100684	0.121764	0.0752264	0.122879	0.496891	0.414128	0.504807	0.611804	positive	20
Cla97C01G000350	Cla97C01G000350.1	-0.0850334	-0.162253	-0.00579478	0.0133531	0.00454716	0.00307427	-0.366037	-0.249096	-0.180547	0.326475	0.447288	0.254023	0.461314	0.459795	0.564411	0.232906	0.230189	0.207623	-0.28604	-0.307301	-0.281582	-0.383768	-0.497339	-0.400208	-0.317281	negative	21
Cla97C01G000370	Cla97C01G000370.1	-0.198918	-0.215811	-0.190545	-0.0521305	0.0375616	-0.0280599	-0.262437	-0.188876	-0.136468	0.463959	0.408817	0.362907	-0.478452	-0.500448	-0.443991	0.0959725	0.062139	0.0700183	0.0616392	0.137688	0.115901	0.231917	0.294481	0.353134	0.666139	positive	22
Cla97C01G000390	Cla97C01G000390.1	-0.152766	-0.198731	-0.0729122	-0.0276536	-0.162854	0.00275205	-0.549488	-0.578454	-0.256977	0.707467	0.815041	0.474576	0.466059	0.487946	0.586016	-0.113795	-0.0958926	-0.136665	-0.297997	-0.285846	-0.283305	-0.0814924	-0.128366	-0.116663	-0.00525547	negative	23
Cla97C01G000460	Cla97C01G000460.1	0.426841	0.436957	0.14496	0.0544078	0.18152	0.173475	0.0470882	0.0790204	-0.17286	-0.463507	-0.50379	-0.404111	-0.428031	-0.441368	-0.518917	0.0508539	0.0427735	0.0663623	0.123544	0.0713576	0.111229	0.288134	0.304743	0.329317	-0.816761	negative	24
Cla97C01G000470	Cla97C01G000470.1	-0.961602	-0.41319	-0.551695	0.0787961	0.065934	0.0162817	0.198863	0.0830581	0.0787961	0.51712	0.401293	0.486345	-1.16436	-1.14743	-1.11601	0.291558	0.334098	0.303167	0.339652	0.330979	0.334989	0.515388	0.489771	0.488191	0.918564	positive	25
Cla97C01G000480	Cla97C01G000480.1	-0.185489	-0.501339	-0.305178	0.565332	0.743164	0.509452	0.221258	0.285446	0.221258	-0.525366	-0.661549	-0.36699	1.25064	1.16597	1.34348	1.0512	1.10228	1.05653	-0.587396	-0.507391	-0.525386	-1.81727	-1.79531	-1.73736	0.453398	positive	26
Cla97C01G000490	Cla97C01G000490.1	-0.262717	-0.339846	-0.336166	-0.137332	-0.0823501	-0.107225	0.188115	0.208417	0.130764	0.294026	0.209676	0.234637	-0.639594	-0.637472	-0.792644	-0.235313	-0.208513	-0.242773	0.139473	0.155016	0.144108	0.784909	0.766004	0.766798	0.9425	positive	27
Cla97C01G000500	Cla97C01G000500.1	0.565	0.538602	0.530382	-0.445096	-0.415018	-0.385554	-0.103846	-0.181049	-0.211745	-0.0244968	0.0578813	0.0749379	1.08622	1.06641	0.986574	-1.03775	-1.0368	-0.994421	0.00963302	-0.122122	-0.123724	0.0357671	0.0819753	0.0482316	0.973791	positive	28
Cla97C01G000540	Cla97C01G000540.1	-0.0658406	-0.085698	-0.0269274	-0.143759	-0.0107749	-0.255239	0.0224251	-0.0107749	-0.0166277	0.191874	0.125666	0.275675	-0.755854	-0.952856	-0.658292	-0.084854	-0.114004	-0.0603469	0.0770885	-0.0689884	0.0502613	0.864429	0.800565	0.90285	0.714467	positive	30
Cla97C01G000600	Cla97C01G000600.1	0.23785	0.284393	0.161161	0.205118	0.00755267	0.258858	-0.144775	0.0829398	-0.0234425	-0.350228	-0.342762	-0.376665	0.176621	0.227714	0.255149	-0.0421074	0.00944526	0.0167316	-0.135217	-0.101124	-0.0891462	-0.132037	-0.143542	-0.0424871	0.682225	positive	32
Cla97C01G000610	Cla97C01G000610.1	-0.709286	-0.942134	-1.04566	0.116877	0.238525	0.177631	0.289464	0.401375	0.415203	0.402533	0.285705	0.369769	-1.2991	-1.06334	-1.30128	0.276844	0.262738	0.404889	0.372437	0.494281	0.215841	0.555331	0.549836	0.531521	0.970207	positive	33
Cla97C01G000680	Cla97C01G000680.1	-0.105028	-0.0357653	-0.0909069	0.31591	0.34621	0.435639	0.115336	0.0317587	0.0202401	-0.307845	-0.329787	-0.395761	-0.401288	-0.330983	-0.333485	-0.15156	-0.214126	-0.174521	0.144234	0.165604	0.148978	0.337682	0.382911	0.426555	-0.545415	negative	34
Cla97C01G000700	Cla97C01G000700.1	0.218043	0.121355	0.116011	0.130658	0.0248633	0.0889936	-0.0437451	0.0291337	-0.0170827	-0.334249	-0.158849	-0.175132	-0.0764413	-0.0416045	-0.0666663	-0.304461	-0.509033	-0.550867	0.00266812	-0.0533218	-0.0992371	0.562441	0.58923	0.547293	-0.760361	negative	35
Cla97C01G000740	Cla97C01G000740.1	-0.0302213	-0.0110539	0.0350702	0.0742535	0.0756334	0.0533948	0.113745	0.0687206	-0.0391544	-0.136452	-0.128485	-0.0754505	-0.188878	-0.176673	-0.167379	0.135904	0.138211	0.168093	0.0419158	0.0082794	-0.0177325	0.0344226	0.0205078	0.00332956	0.265524	positive	36
Cla97C01G000780	Cla97C01G000780.1	0.606064	0.45123	0.478218	-0.266612	-0.293748	-0.37836	-0.264821	-0.281021	-0.133187	-0.0802532	0.083358	0.0791334	-0.209999	-0.0488878	-0.329868	0.0842432	0.126857	0.212145	-0.32222	-0.353689	-0.174085	0.29774	0.437397	0.280367	-0.196472	negative	38
Cla97C01G000930	Cla97C01G000930.1	0.0700725	0.0187158	0.0782311	-0.0170495	-0.00120341	-0.0286842	0.0383637	-0.0214015	0.00165908	-0.0822336	0.000228541	-0.0566985	0.140044	0.230203	0.304566	-0.195829	-0.209332	-0.16575	-0.0587841	-0.160486	-0.219309	0.211337	0.0118417	0.111498	0.234165	positive	39
Cla97C01G001000	Cla97C01G001000.1	0.727963	1.05421	0.930456	-0.155474	-0.291936	-0.326702	-0.167678	-0.496627	-0.30151	-0.190621	-0.4748	-0.307284	1.71386	1.95123	1.9362	-0.119243	0.089274	-0.153854	-1.42085	-1.35342	-1.21946	-0.571972	-0.385296	-0.466478	0.908259	positive	42
Cla97C01G001250	Cla97C01G001250.1	0.82744	0.602515	0.398564	-0.149972	-0.246073	-0.0459058	-0.30216	-0.2443	-0.0771341	-0.411347	-0.221441	-0.130186	1.84932	1.83238	1.8256	0.116483	0.19028	0.124854	-0.581039	-0.550281	-0.604341	-1.41708	-1.37905	-1.40714	0.880349	positive	48
Cla97C01G001290	Cla97C01G001290.1	-0.65009	-1.05253	-0.578345	0.155908	0.162678	0.11321	0.302881	0.394304	0.386228	0.259329	0.288097	0.218326	-1.42437	-1.42221	-1.49428	1.11856	1.12694	1.06919	0.743387	0.670582	0.779776	-0.371948	-0.425195	-0.370432	0.773159	positive	51
Cla97C01G001320	Cla97C01G001320.1	0.0888446	0.0585289	0.0501493	-0.0157648	0.121205	0.109155	-0.108093	-0.0438942	0.0501493	-0.0483863	-0.136505	-0.125389	4.52832	4.51184	4.47369	-0.861859	-0.831886	-0.847832	-1.89381	-1.85938	-1.83494	-1.8626	-1.77152	-1.75	0.522505	positive	52
Cla97C01G001430	Cla97C01G001430.1	0.18437	0.493242	0.536651	0.0764551	0.00907413	0.18567	-0.0116206	-0.202353	-0.198958	-0.132692	-0.286315	-0.653524	0.327281	0.294874	0.329453	0.318965	0.328383	0.301755	-0.0442637	-0.0589728	-0.0224534	-0.559248	-0.622923	-0.59285	0.790977	positive	54
Cla97C01G001440	Cla97C01G001440.1	1.5263	1.79065	1.65675	-0.358928	-0.472386	-0.21154	-0.315931	-0.847754	-0.63023	-0.358928	-0.98696	-0.791039	3.06178	3.0382	3.09487	-0.175723	-0.0264219	-0.183693	-1.02333	-1.02412	-1.01786	-2.06149	-1.91844	-1.76377	0.955541	positive	55
Cla97C01G001530	Cla97C01G001530.1	-0.0124879	0.105694	0.0279912	0.0107819	-0.131635	-0.138019	0.0534262	-0.106379	-0.0406173	-0.0316749	0.162641	0.10028	-0.252823	-0.208112	-0.227228	-0.820899	-0.620606	-0.807919	-0.0984255	-0.17356	-0.0633667	1.10823	1.09003	1.07468	0.56818	positive	57
Cla97C01G001570	Cla97C01G001570.1	0.268312	0.280345	0.287516	-0.0569427	-0.0906377	-0.114071	-0.0999655	-0.0691046	-0.117225	-0.0599736	-0.126727	-0.101526	-0.0823391	-0.125997	-0.122151	-0.058151	0.00901431	-0.117009	-0.0147176	-0.0277357	-0.0966906	0.0871418	0.248416	0.300218	-0.484773	negative	58
Cla97C01G001590	Cla97C01G001590.1	0.47067	0.353869	0.482266	-0.0885904	-0.0964099	-0.0531567	-0.113764	-0.104272	-0.188683	-0.246672	-0.243195	-0.172062	0.872635	0.979735	0.929941	-0.226238	-0.153676	-0.265893	-0.342411	-0.503431	-0.296476	-0.321358	-0.387233	-0.285595	0.962598	positive	59
Cla97C01G001620	Cla97C01G001620.1	-0.317633	-0.140615	-0.107044	-0.0241426	-0.0819799	0.00831202	-0.108625	-0.0819799	-0.171677	0.45509	0.253242	0.317051	-0.366122	-0.338355	-0.324185	0.317636	0.323526	0.258414	0.0589601	0.163427	0.0934005	-0.0460392	-0.0468617	-0.0938021	0.110647	positive	61
Cla97C01G001700	Cla97C01G001700.1	0.0920188	0.0569832	0.0598176	0.122162	0.494192	0.363795	0.127575	-0.00386233	0.107169	-0.243123	-0.631625	-0.545103	-0.694654	-0.00509353	-0.487925	-0.093194	0.162616	0.088032	0.20756	-0.0638652	0.0700268	0.387319	0.293347	0.135831	-0.276206	negative	63
Cla97C01G001730	Cla97C01G001730.1	1.06191	1.02677	1.04014	-0.106476	-0.116917	-0.0926698	-0.261951	-0.281394	-0.31106	-0.738137	-0.519203	-0.701007	2.68463	2.66733	2.60139	-0.574027	-0.440623	-0.586829	-0.93231	-1.00824	-0.976789	-1.03082	-1.1003	-1.3034	0.977174	positive	65
Cla97C01G001870	Cla97C01G001870.1	-0.0936149	-0.106201	-0.106201	-0.192479	-0.2385	-0.243705	-0.300427	-0.255924	-0.327804	0.592658	0.612957	0.659241	-0.01472	0.00219216	-0.0279455	0.40023	0.424436	0.401703	0.134836	0.19142	0.175977	-0.550559	-0.569884	-0.567686	-0.933563	negative	68
Cla97C01G001880	Cla97C01G001880.1	-0.274644	0.0132697	-0.152181	-0.00259214	-0.0113181	0.0528756	-0.0259798	-0.150573	0.0486838	0.278454	0.16556	0.0584459	0.382225	0.34256	0.4414	-0.32633	-0.402332	-0.383096	0.016725	-0.283394	-0.146855	0.164017	0.139437	0.0556435	-0.153303	negative	69
Cla97C01G001890	Cla97C01G001890.1	-0.266658	-0.196629	0.0400834	-0.547171	-0.589059	-0.171662	-0.417822	-0.495359	-0.025505	1.05225	1.03013	0.58741	-0.291138	-0.340662	-0.216695	-0.20348	-0.132087	-0.184259	0.124566	0.150872	0.16102	0.307097	0.293594	0.331172	0.650398	positive	70
Cla97C01G001900	Cla97C01G001900.1	0.608141	0.655112	0.603983	-0.813137	-1.04483	-0.852589	-0.352948	-0.212508	-0.344888	0.594585	0.549896	0.609179	0.410981	0.314866	0.294482	-0.462926	-0.453522	-0.4571	-0.0683905	-0.186189	-0.17514	0.275465	0.241482	0.265991	0.983344	positive	71
Cla97C01G001910	Cla97C01G001910.1	-0.127324	-0.216961	-0.148014	-0.0624379	-0.0669771	-0.0519017	0.179035	0.225557	0.144114	0.00543144	0.0798643	0.0396134	-0.823573	-0.858689	-0.772792	-0.181099	-0.180922	-0.233851	0.309712	0.34137	0.342455	0.677054	0.624991	0.755344	0.786219	positive	72
Cla97C01G001950	Cla97C01G001950.1	-0.394868	-0.614006	-0.700758	-0.0862945	-0.0862945	-0.0397018	0.20436	0.137	0.0944635	0.478535	0.48386	0.523705	-2.23128	-2.13185	-1.96761	0.0703189	0.0668823	0.0599659	1.04781	0.952925	1.07021	1.08363	0.970885	1.00811	0.914663	positive	73
Cla97C01G002000	Cla97C01G002000.1	0.984188	0.150333	0.580434	-0.292503	-0.103371	-0.349761	-0.375296	0.0222967	-0.27576	-0.577029	0.238443	-0.00197632	3.32875	3.31337	3.30419	-0.725908	-0.505979	-0.646291	-1.08885	-1.06608	-1.04676	-1.6356	-1.59576	-1.63508	0.749886	positive	75
Cla97C01G002210	Cla97C01G002210.1	-0.409293	-0.557816	-0.531976	0.0515633	0.129191	0.0643243	0.0300408	0.0155121	0.0458553	0.373207	0.396941	0.39245	-0.98816	-0.963105	-0.883106	0.0229644	0.0765308	0.054356	0.478872	0.498425	0.482404	0.40861	0.405822	0.406385	0.883907	positive	78
Cla97C01G002420	Cla97C01G002420.1	0.18764	0.192761	0.215581	0.0448695	0.0505216	0.0770707	-0.0396762	-0.0188105	-0.0578046	-0.208288	-0.237262	-0.206602	1.06763	1.13343	1.16978	0.216737	0.170247	0.140096	-0.310291	-0.370168	-0.306605	-0.935935	-0.991794	-0.983127	0.981312	positive	80
Cla97C01G002440	Cla97C01G002440.1	1.77194	1.7926	1.81633	1.03959	1.07037	1.09719	-0.267437	-0.258909	-0.322653	-1.91058	-2.57801	-3.25043	0.123974	0.237443	0.154507	-0.100592	-0.131056	-0.100713	-0.025281	-0.074544	0.0307399	-0.0222118	-0.0858455	-0.00642055	0.387242	positive	81
Cla97C01G002470	Cla97C01G002470.1	0.113395	0.207093	0.203308	0.220887	0.141358	0.233313	-0.148295	-0.027743	-0.0991706	-0.146684	-0.326505	-0.370956	0.507918	0.484894	0.43285	0.184947	0.257225	0.170647	-0.0950969	-0.140385	-0.0570528	-0.57873	-0.652387	-0.51483	0.889684	positive	82
Cla97C01G002590	Cla97C01G002590.1	-0.0430611	-0.0368891	0.0627492	-0.180874	-0.155578	-0.138957	-0.414939	-0.510051	-0.389158	0.666745	0.645794	0.494218	0.194591	0.222566	0.239021	-0.180907	-0.142185	-0.178765	-0.0879841	-0.171016	-0.14914	0.115266	0.0500453	0.0885085	0.554736	positive	84
Cla97C01G002610	Cla97C01G002610.1	0.524492	0.54331	0.428785	0.38309	0.223717	0.367922	-0.247265	-0.263526	-0.139965	-0.709169	-0.495641	-0.61575	-0.495425	-0.477939	-0.555076	0.122155	0.179098	0.15348	0.124	0.164294	0.169815	0.239698	0.175575	0.200325	-0.692547	negative	86
Cla97C01G002630	Cla97C01G002630.1	-0.209482	-0.202628	-0.162176	0.17035	0.145051	0.131555	-0.4684	-0.41	-0.386509	0.495179	0.462135	0.434924	-0.607469	-0.582029	-0.574555	0.321058	0.368872	0.307014	0.0708391	-0.0221735	0.0595709	0.244313	0.180335	0.234224	0.516964	positive	87
Cla97C01G002640	Cla97C01G002640.1	0.168638	0.133591	0.116408	-0.0646963	-0.0859574	0.0800525	-0.0437439	-0.0737699	-0.0201651	-0.081375	0.0732183	-0.2022	0.159998	0.174433	0.108099	-0.125702	-0.133243	-0.312085	0.0084161	-0.0185171	-0.0916582	0.112764	0.0916596	0.025835	0.295395	positive	88
Cla97C01G002660	Cla97C01G002660.1	0.202248	0.2074	0.234153	0.199665	0.190587	0.176206	0.0585371	0.195781	0.121303	-0.481513	-0.510829	-0.59354	0.276749	0.256856	0.322241	-0.178884	-0.2454	-0.19309	-0.109572	-0.097304	-0.0824512	-0.00048716	0.0242613	0.0270808	0.00658058	positive	89
Cla97C01G002730	Cla97C01G002730.1	0.514187	0.419567	0.425051	0.0252571	0.0281425	0.0637313	-0.0873347	-0.0904608	-0.0888969	-0.374934	-0.485813	-0.348497	-0.472589	-0.379104	-0.354222	-0.344361	-0.2902	-0.371805	0.397467	0.427602	0.392431	0.352126	0.344507	0.298149	-0.800168	negative	91
Cla97C01G002740	Cla97C01G002740.1	-0.254407	-0.293449	-0.216393	0.15185	0.125182	0.0925157	0.210109	0.230269	0.16631	-0.0813726	-0.0445749	-0.086039	0.353704	0.282895	0.310293	0.167148	0.168717	0.216207	-0.0728109	-0.0904242	-0.138343	-0.408001	-0.383359	-0.406027	-0.248275	negative	92
Cla97C01G002820	Cla97C01G002820.1	-0.232452	-0.200145	-0.253236	-0.0290996	0.00630569	-0.0201665	0.0323009	0.0493744	0.0634496	0.203498	0.193293	0.186878	0.0548438	0.0803538	0.0764534	-0.15226	-0.108526	-0.179045	-0.0312124	-0.135647	-0.0405931	0.143813	0.133598	0.15822	0.154952	positive	94
Cla97C01G002830	Cla97C01G002830.1	0.649232	0.379599	0.444642	-0.107229	-0.141995	-0.172475	-0.350768	-0.157155	-0.143671	-0.222979	-0.138647	-0.0385546	5.78372	5.80581	5.82338	-1.56262	-1.53061	-1.38449	-2.20675	-2.21215	-2.23033	-2.04538	-2.04809	-2.19249	0.952176	positive	95
Cla97C01G002840	Cla97C01G002840.1	-0.150756	-0.122124	-0.165288	-0.136369	-0.142746	-0.101793	0.237117	0.169243	0.120821	0.0596522	0.106107	0.126135	0.280489	0.286075	0.175601	-0.115015	-0.0626547	-0.130075	-0.24943	-0.254351	-0.205367	0.12645	0.0591623	0.0891158	-0.53029	negative	96
Cla97C01G002880	Cla97C01G002880.1	-0.576787	-0.516215	-0.287482	0.118033	0.050984	0.0890818	0.33084	0.315448	0.195102	0.109821	0.0807022	0.0904737	-0.813301	-0.708114	-0.762041	0.17076	0.299057	0.162825	0.28962	0.13447	0.172717	0.35232	0.300068	0.40162	0.897167	positive	98
Cla97C01G002890	Cla97C01G002890.1	-0.656317	-0.556153	-0.680085	-0.0325911	-0.0341218	-0.0588367	0.294529	0.263714	0.288419	0.396908	0.34839	0.426145	-1.31935	-1.30606	-1.34483	0.163824	0.300324	0.218986	0.570364	0.559237	0.636092	0.532108	0.509991	0.47931	0.960877	positive	99
Cla97C01G002920	Cla97C01G002920.1	-0.483673	-0.473492	-0.498049	0.201279	0.235197	0.206354	0.194909	0.193632	0.267121	0.0343696	0.0737823	0.0485695	0.231917	0.225234	0.264491	0.266524	0.296433	0.323302	-0.107448	-0.0476406	-0.0337969	-0.496539	-0.453632	-0.468844	-0.257304	negative	101
Cla97C01G002930	Cla97C01G002930.1	0.145844	0.255182	0.192097	-0.107561	0.077673	0.0303673	0.137989	-0.0905421	0.0528221	-0.167947	-0.291561	-0.234365	-0.175455	0.131046	-0.17054	-0.464873	-0.716386	-0.390222	0.0717608	0.0153157	0.0661492	0.505081	0.636027	0.492097	-0.521686	negative	102
Cla97C01G003070	Cla97C01G003070.1	-0.351483	-0.242851	-0.217346	0.137902	-0.111756	0.164015	0.0677104	0.115328	0.129975	0.153626	0.119338	0.0355404	-0.706669	-0.632421	-0.79734	0.0691711	0.0833924	0.0930552	0.197257	0.10135	0.134539	0.492878	0.47821	0.486578	0.852694	positive	104
Cla97C01G003100	Cla97C01G003100.1	-0.592959	-0.244876	-0.448356	0.378807	0.217269	0.134582	0.187628	0.104553	0.192827	0.0134649	0.000181661	0.0568792	-1.65608	-1.76279	-1.86549	0.568151	0.475626	0.568087	0.372055	0.424418	0.465008	0.881294	0.643409	0.886311	0.856826	positive	105
Cla97C01G003140	Cla97C01G003140.1	-0.611311	-0.656288	-0.697755	-0.217995	0.0172681	-0.118578	0.725918	0.658891	0.681898	0.0864365	0.00819451	0.123322	-2.45048	-2.21358	-2.22239	0.803362	1.01511	0.835936	1.24322	1.23839	1.2388	0.289228	0.105169	0.117231	0.854162	positive	106
Cla97C01G003260	Cla97C01G003260.1	0.204763	0.125109	0.105873	0.0422454	0.0779399	0.119639	0.146784	0.108637	0.0989401	-0.430803	-0.311472	-0.287655	-0.0561009	0.00507451	-0.113043	-0.00954907	-0.00224692	0.00801293	0.0836571	0.0334501	0.0492879	-0.0106111	-0.0490021	0.0610703	0.0048076	positive	107
Cla97C01G003310	Cla97C01G003310.1	0.556337	0.45343	0.427336	-0.217549	-0.152151	-0.224427	-0.197109	-0.188677	-0.126156	-0.210703	-0.0432465	-0.0770852	-0.281081	-0.195245	-0.202875	0.13298	0.146421	0.117505	0.21436	0.23888	0.270573	-0.117467	-0.169174	-0.154878	-0.736806	negative	108
Cla97C01G003340	Cla97C01G003340.1	-0.108835	-0.0994159	-0.0143482	-0.273847	-0.383889	-0.048682	-0.0366469	-0.199846	-0.069988	0.430256	0.559756	0.245486	-0.188658	-0.148271	-0.202741	-0.0689958	-0.0468554	-0.0436812	0.274822	0.240287	0.21552	-0.00381236	-0.0132829	-0.0143304	-0.0173335	negative	109
Cla97C01G003460	Cla97C01G003460.1	-0.14793	-0.230487	-0.11305	-0.0278928	-0.0146637	-0.0974702	0.148417	0.108671	0.0636468	0.0370719	0.101939	0.171749	-0.00292741	0.105265	0.0539185	0.0160039	0.121395	0.101117	-0.0379325	-0.14626	-0.118406	-0.131101	-0.0260373	0.0649642	-0.510917	negative	110
Cla97C01G003670	Cla97C01G003670.1	0.544844	0.695806	0.467939	0.0348694	-0.00264428	-0.113189	0.143265	-0.0271753	0.111312	-0.690785	-0.720481	-0.44376	-0.0401116	0.0497843	-0.0552212	-0.062073	-0.0238004	-0.0343379	-0.0268578	-0.128216	-0.0510592	0.120531	0.122655	0.128706	-0.58616	negative	112
Cla97C01G003780	Cla97C01G003780.1	-1.14811	-1.29659	-0.776946	0.213477	0.0933024	0.13158	0.31164	0.386602	0.266043	0.523552	0.698512	0.596943	-4.12502	-4.33645	-4.14431	1.49906	1.42132	1.50801	1.35844	1.3801	1.35159	1.33968	1.37141	1.37619	0.948504	positive	116
Cla97C01G003870	Cla97C01G003870.1	-0.106168	-0.0952684	-0.126633	-0.193143	-0.203139	-0.163565	0.0294867	0.212317	0.0618449	0.265232	0.0880388	0.230997	-1.38485	-1.57301	-1.52687	0.0267593	-0.0340871	0.0683752	0.804541	0.866297	0.786951	0.61731	0.662517	0.686067	0.620775	positive	118
Cla97C01G003890	Cla97C01G003890.1	1.12905	0.85529	1.15552	0.114132	0.151145	0.154065	-0.414218	-0.0425447	-0.476089	-1.06105	-0.38425	-1.18105	1.97642	1.8937	1.92999	0.235152	0.0727497	0.254049	-0.737817	-0.64468	-0.771825	-1.41767	-1.38147	-1.40859	0.957279	positive	119
Cla97C01G003900	Cla97C01G003900.1	0.191124	0.182103	0.120027	-0.366479	-0.203926	-0.142737	-0.0276336	-0.170529	-0.239846	0.0309611	0.332942	0.293995	0.415153	0.225495	0.320351	-0.28093	-0.249112	-0.179868	0.0501279	0.099921	0.0736132	-0.150404	-0.142321	-0.182026	0.339424	positive	120
Cla97C01G003910	Cla97C01G003910.1	-1.14493	-1.2663	-0.795751	0.0494745	-0.106645	0.105406	0.133306	0.0784667	0.346528	0.835535	1.01595	0.748965	-1.76428	-1.77238	-1.79043	0.147369	0.190617	0.185706	0.743972	0.707184	0.727895	0.88821	0.888448	0.847697	0.933086	positive	121
Cla97C01G003960	Cla97C01G003960.1	0.288804	0.381988	0.176231	-0.0917549	-0.155814	-0.0980344	-0.12023	-0.105922	0.00663156	0.00516763	-0.210892	-0.0761749	2.61347	2.54482	2.58752	-0.682309	-0.591535	-0.703621	-0.992476	-1.01443	-0.903812	-0.858577	-1.04745	-0.951605	0.914005	positive	122
Cla97C01G003980	Cla97C01G003980.1	0.115403	0.131374	0.192278	0.0313657	0.0454822	-0.00891152	0.0468863	0.0199722	0.0142416	-0.146561	-0.202182	-0.239349	0.707066	0.675019	0.745843	-0.161251	-0.0644076	-0.0850073	-0.19584	-0.103965	-0.139914	-0.425658	-0.431915	-0.519968	0.859545	positive	123
Cla97C01G003990	Cla97C01G003990.1	0.0459749	-0.0189899	0.0918227	0.0317889	-0.0488295	0.00734809	0.0835943	0.145511	0.10814	-0.160042	-0.0916698	-0.194648	0.589792	0.5578	0.59675	0.0901244	0.0841271	0.147454	-0.257718	-0.309606	-0.244296	-0.418423	-0.415399	-0.420605	0.346577	positive	124
Cla97C01G004180	Cla97C01G004180.1	0.181033	0.201407	0.2165	-0.0766256	-0.00484983	-0.0417872	0.000973366	-0.0904904	-0.0583441	-0.117049	-0.123369	-0.0873978	0.566388	0.46324	0.327988	-0.261996	-0.244816	-0.18026	-0.230167	-0.212116	-0.198415	0.0270886	-0.0265582	-0.0303765	0.807124	positive	128
Cla97C01G004220	Cla97C01G004220.1	0.205531	0.113261	0.111918	0.215568	0.167261	0.0751857	-0.051473	-0.213709	-0.12397	-0.396527	-0.0635585	-0.0394879	0.622654	0.677399	0.724102	0.381971	0.304723	0.410214	-0.936563	-0.872306	-1.04134	-0.0632271	-0.0432484	-0.164373	0.65101	positive	130
Cla97C01G004230	Cla97C01G004230.1	0.327231	0.400237	0.459086	0.0134703	0.0844135	0.166491	0.0705012	0.0436924	-0.0749928	-0.42109	-0.388057	-0.680983	-0.397119	-0.374732	-0.385888	0.142267	0.191411	0.136369	0.0800486	0.083191	0.0779545	0.159437	0.127078	0.159984	-0.712595	negative	131
Cla97C01G004300	Cla97C01G004300.1	0.121338	0.16083	0.246535	-0.185323	-0.261584	-0.235714	-0.0849075	-0.0529309	0.0132932	0.158231	0.147786	-0.0275543	2.26489	2.28727	2.38731	-0.976149	-0.925734	-1.00792	-0.303988	-0.230984	-0.240401	-1.1035	-1.05679	-1.09399	0.606727	positive	132
Cla97C01G004320	Cla97C01G004320.1	0.200387	0.106179	0.404387	-0.144201	-0.168531	-0.180026	-0.104543	0.14355	0.0212491	0.0705889	-0.0522986	-0.296741	-0.2992	-0.314475	-0.329421	0.145037	0.0669831	0.105748	0.0676643	0.136898	0.110464	0.0416269	0.0289395	0.239734	-0.779342	negative	134
Cla97C01G004330	Cla97C01G004330.1	-0.320617	-0.602569	-0.591411	0.0394941	0.0480816	0.153977	0.267413	0.363431	0.33681	0.0819294	0.151323	0.0721389	-1.50302	-1.52261	-1.55027	0.469803	0.49125	0.491826	0.620059	0.57652	0.63099	0.436356	0.391405	0.467688	0.941942	positive	135
Cla97C01G004370	Cla97C01G004370.1	-0.0370503	-0.0192207	0.0258445	-0.0147975	0.0541891	0.0778518	0.0737041	0.11196	0.0287041	-0.0749185	-0.131256	-0.0950099	-0.245947	-0.332351	-0.24328	0.246142	0.200463	0.254384	0.175245	0.177465	0.134567	-0.168624	-0.075501	-0.122563	0.592071	positive	137
Cla97C01G004380	Cla97C01G004380.1	0.206353	0.365551	0.23641	0.101383	-0.0998424	-0.0688821	-0.136288	-0.109262	-0.0688821	-0.218845	-0.154049	-0.0536475	-0.112986	-0.0111839	0.0400921	-0.0285145	0.0158061	0.0480145	-0.00870965	-0.0540296	-0.0538068	0.0576916	0.0485181	0.0591081	-0.347316	negative	138
Cla97C01G004400	Cla97C01G004400.1	-0.417304	-0.729733	-0.174137	-0.0949748	-0.0632311	0.0146888	-0.135663	-0.211924	0.0586321	0.649354	0.821619	0.282672	-0.848248	-0.823869	-0.692234	0.233574	0.221148	0.218722	0.35821	0.306836	0.345161	0.24026	0.175077	0.265364	0.589748	positive	139
Cla97C01G004460	Cla97C01G004460.1	-0.109821	-0.161887	-0.119149	-0.00811735	-0.00811735	0.0401663	0.109691	0.0650887	0.0133837	0.0582089	0.0595875	0.0609648	-0.536406	-0.50259	-0.698092	-0.0795978	0.194375	-0.101612	0.16668	0.184257	0.00953497	0.413767	0.49417	0.455513	0.871008	positive	141
Cla97C01G004620	Cla97C01G004620.1	-0.626231	-0.483573	-0.415244	0.313454	0.326425	0.296776	0.200147	0.257913	0.153268	-0.0031534	0.00567045	-0.0254521	-0.0367567	-0.0244358	0.0256089	0.764716	0.67663	0.812692	-0.158409	-0.0655369	-0.164139	-0.583381	-0.584968	-0.662019	0.355662	positive	142
Cla97C01G004640	Cla97C01G004640.1	0.30268	0.283523	0.249375	-0.00504612	-0.0883745	-0.0168716	-0.387095	-0.208669	-0.292428	-0.00357473	0.108164	0.0583159	0.141821	0.105533	0.172504	-0.211894	-0.162663	-0.236343	-0.0440764	-0.0331349	-0.0893954	0.160305	0.0843185	0.113025	0.55345	positive	143
Cla97C01G004760	Cla97C01G004760.1	-0.0328612	0.0310753	0.0268049	0.0225218	-0.0403093	-0.0388166	0.0786103	0.0963794	0.0395785	-0.102879	-0.0997632	0.0196593	0.0320414	0.374098	0.163727	0.00339534	-0.0667082	0.0514971	-0.0363347	-0.202805	-0.0966578	-0.123943	-0.0269837	-0.0713264	0.0337616	positive	146
Cla97C01G004860	Cla97C01G004860.1	-0.091173	-0.0802257	-0.161955	0.172123	0.170814	0.156341	0.209564	0.236083	0.284074	-0.357665	-0.250345	-0.287636	-0.474463	-0.488936	-0.427629	-0.231951	-0.308613	-0.252813	0.446091	0.368158	0.343484	0.314946	0.360868	0.350859	-0.00647908	negative	148
Cla97C01G005010	Cla97C01G005010.1	0.0346761	-0.133654	-0.100559	0.201919	0.0473871	-0.268927	-0.154528	0.204443	-0.011448	-0.0666846	-0.102118	0.349494	0.756294	0.780059	0.585422	0.261426	0.661888	0.515776	-0.529132	-0.443063	-0.484407	-0.863309	-0.578364	-0.662589	-0.246993	negative	149
Cla97C01G005050	Cla97C01G005050.1	0.0192809	0.104253	0.111113	0.210284	0.220471	0.177979	0.221739	0.216659	0.221739	-0.422751	-0.536083	-0.544683	-0.157331	-0.125627	-0.200648	-0.0776299	0.012086	-0.0451913	0.0828555	0.0707685	0.0653249	0.124807	0.137633	0.112952	-0.49848	negative	150
Cla97C01G005290	Cla97C01G005290.1	-0.449164	-0.508141	0.262878	0.138453	0.259224	-0.136833	0.253114	0.250662	0.115733	0.0382539	0.00373114	-0.227911	-1.79463	-1.84848	-1.68937	0.430339	0.432058	0.254583	0.5956	0.347931	0.288413	1.06947	0.89301	1.02108	0.455427	positive	155
Cla97C01G005310	Cla97C01G005310.1	0.0967213	0.103479	0.159025	0.0058679	0.0899322	0.0443041	0.0259256	0.0679896	-0.0455312	-0.163877	-0.215083	-0.168753	-0.204839	-0.0940451	-0.156436	0.1111	0.129435	0.0171172	-0.0876385	-0.0829533	-0.0386342	0.161378	0.111516	0.134	-0.70649	negative	156
Cla97C01G005370	Cla97C01G005370.1	-0.0484444	-0.0394087	-0.0605807	-0.223287	-0.277145	-0.400907	0.111543	0.106125	0.140987	0.205751	0.184056	0.301312	-0.808109	-0.892302	-1.07545	-0.270589	-0.272839	-0.229214	0.442711	0.418732	0.44104	0.805286	0.695254	0.745477	0.651324	positive	158
Cla97C01G005460	Cla97C01G005460.1	-0.676126	-0.2734	-0.538388	-0.485418	-0.384978	-0.39344	-0.257866	-0.052961	-0.186282	1.20279	0.942003	1.10406	-0.096336	-0.116738	-0.248327	-1.81708	-1.84033	-1.51739	0.25497	0.430035	0.345699	1.51496	1.51838	1.57216	0.796791	positive	159
Cla97C01G005530	Cla97C01G005530.1	-0.294532	-0.188646	-0.137674	-0.102562	-0.0228179	-0.028798	0.127244	0.0821778	0.0428036	0.201917	0.151245	0.169641	-0.096355	-0.110611	-0.0971679	-0.0693837	-0.0252289	-0.143028	0.098047	0.0651342	0.133065	0.0834027	0.0744183	0.0877079	0.822419	positive	161
Cla97C01G005540	Cla97C01G005540.1	0.624125	0.31764	0.416939	-0.193056	-0.0505115	-0.109659	-0.223681	-0.00842993	-0.0308209	-0.303213	-0.191374	-0.247958	1.95947	2.08102	1.90963	-0.378035	-0.698384	-0.62504	-0.508462	-0.476141	-0.560072	-1.1691	-0.783969	-0.75091	0.935707	positive	162
Cla97C01G005610	Cla97C01G005610.1	0.100052	0.0562894	0.10543	0.130706	0.152953	0.177416	0.125422	0.124098	0.0865184	-0.272947	-0.402448	-0.38349	0.0362228	0.154241	0.132208	0.322423	0.302936	0.402028	-0.144858	-0.19145	-0.182822	-0.212552	-0.344597	-0.273779	0.699049	positive	163
Cla97C01G005640	Cla97C01G005640.1	0.948532	0.785196	0.61436	-0.118853	-0.0669941	-0.0604364	-0.0344996	0.0175661	0.0557956	-0.956328	-0.744409	-0.43993	0.489727	0.589499	0.591178	-0.125091	-0.117313	-0.0689445	-0.192236	-0.118697	-0.243671	-0.277346	-0.257432	-0.269673	0.873836	positive	164
Cla97C01G005710	Cla97C01G005710.1	0.0884774	0.221503	0.0341872	0.2413	0.00263596	0.0426737	-0.00754952	0.084373	0.0454914	-0.344892	-0.321106	-0.0870942	-0.529769	-0.567468	-0.652747	-0.157908	-0.214202	-0.152823	0.178409	0.134963	0.181378	0.643135	0.594135	0.542897	-0.757673	negative	166
Cla97C01G005730	Cla97C01G005730.1	0.373581	0.151569	0.309295	0.248258	0.105508	0.154234	-0.0714898	0.16352	0.0550782	-0.682363	-0.324289	-0.482901	-0.220526	-0.323551	-0.35148	-0.133681	-0.0749003	-0.0873737	0.103695	0.0595136	0.104059	0.285776	0.337692	0.300776	-0.856546	negative	167
Cla97C01G005760	Cla97C01G005760.1	0.141059	0.267368	0.350441	0.15301	0.0825546	-0.00621054	-0.0390684	-0.0866763	-0.0773384	-0.32004	-0.190232	-0.274867	0.0663627	0.0464504	0.109259	-0.126998	-0.257011	-0.201806	0.0248183	-0.0119465	0.0157665	0.0190416	0.13877	0.177294	-0.203842	negative	168
Cla97C01G005930	Cla97C01G005930.1	-0.101299	-0.0980929	-0.0917022	-0.206117	-0.161932	-0.228728	-0.353143	-0.370444	-0.343621	0.66584	0.614001	0.675238	0.160847	0.141578	0.177558	0.127355	0.119444	0.120212	-0.067473	-0.0978332	-0.101506	-0.177877	-0.213198	-0.189106	-0.586563	negative	169
Cla97C01G005940	Cla97C01G005940.1	1.18217	1.18363	1.19959	-0.0632964	-0.0563853	-0.0172762	-0.197513	-0.519916	-0.386091	-0.938921	-0.72381	-0.662181	4.88364	4.88356	4.94343	-1.19554	-1.08642	-1.19658	-1.77177	-1.58862	-1.69226	-2.096	-2.02127	-2.06217	0.960783	positive	170
Cla97C01G006020	Cla97C01G006020.1	-0.199199	-0.746426	-0.812476	0.0455945	0.130524	0.0326296	0.305997	0.461349	0.460273	0.0641183	0.073995	0.183619	-1.22328	-1.0071	-1.16923	-0.420506	-0.402981	-0.494867	0.529714	0.566973	0.630385	1.0815	1.0324	0.876988	0.729451	positive	172
Cla97C01G006030	Cla97C01G006030.1	0.210974	0.239494	0.217222	0.0976865	0.0283128	0.112511	-0.00184918	-0.0179036	-0.179232	-0.179232	-0.29184	-0.236144	0.0538871	0.0600299	0.0916661	-0.0775228	-0.0186944	-0.017504	0.0140805	0.0145685	-0.0066394	-0.0496242	-0.044333	-0.0199143	0.625893	positive	173
Cla97C01G006080	Cla97C01G006080.1	-0.282472	-0.296	-0.246379	-0.436614	-0.587666	-0.55013	-0.0850254	-0.307697	-0.237029	1.00599	1.04407	0.978959	-0.0206476	-0.0736969	0.0326532	0.0272633	0.0588583	0.049236	0.0687056	0.0895538	0.115465	-0.0754297	-0.136744	-0.135217	-0.784292	negative	175
Cla97C01G006100	Cla97C01G006100.1	-0.206331	-0.21969	-0.207994	0.0447421	0.0669165	0.0558719	0.115597	0.235466	0.0236394	0.00653217	0.0503178	0.0349326	-0.283355	-0.228394	-0.328957	-0.000908045	-0.0134456	0.0488721	0.040447	-0.00866937	-4.01569e-05	0.262501	0.220764	0.291185	0.656484	positive	176
Cla97C01G006120	Cla97C01G006120.1	0.209404	0.228149	-0.233147	0.226906	0.102392	0.0887815	-0.216154	-0.0854233	0.113189	-0.243439	-0.243439	0.0527815	0.0883382	0.208974	0.124969	0.156465	0.227717	0.153188	-0.168374	-0.126413	-0.145011	-0.193243	-0.223843	-0.102768	0.643665	positive	177
Cla97C01G006140	Cla97C01G006140.1	0.332992	0.277337	0.375343	-0.0325683	-0.112568	0.0174383	-0.00587846	0.0318223	0.0232091	-0.285462	-0.21924	-0.402426	0.282825	0.218432	0.183501	0.0283652	0.00395081	0.0611387	-0.077268	-0.165647	-0.167301	-0.114265	-0.119735	-0.133997	0.78636	positive	178
Cla97C01G006170	Cla97C01G006170.1	-0.0320492	-0.0866688	-0.0365227	-0.137019	-0.137019	-0.0990925	0.0823969	0.0177038	0.0205777	0.125749	0.129747	0.152197	-0.553997	-0.684343	-0.660619	-0.0325398	-0.0586134	0.0733735	0.20101	0.148874	0.105613	0.531065	0.46015	0.470027	0.661809	positive	180
Cla97C01G006270	Cla97C01G006270.1	-0.3089	-0.367869	-0.267958	0.128533	0.10704	0.123189	0.0879668	0.0988964	0.113791	0.090707	0.123189	0.0714157	-0.341295	-0.315072	-0.299318	0.391194	0.403009	0.406459	0.0353435	0.0400197	0.0317019	-0.116139	-0.12402	-0.111883	0.72743	positive	182
Cla97C01G006310	Cla97C01G006310.1	0.0172893	0.0158587	0.0816061	0.0413938	0.0014748	0.0158587	0.00724559	0.0843385	0.0215724	-0.0515281	-0.130114	-0.104996	0.525309	0.58018	0.641903	-0.136624	-0.0717113	-0.113251	-0.228488	-0.213955	-0.188766	-0.255102	-0.286331	-0.253164	0.450495	positive	183
Cla97C01G006330	Cla97C01G006330.1	-0.46471	-0.519	-0.448408	0.127067	0.179146	0.137904	0.161994	0.102382	0.140601	0.184383	0.205141	0.193501	-0.633977	-0.719046	-0.575481	-0.0578151	-0.104022	-0.0969138	0.255331	0.329382	0.311641	0.385012	0.461494	0.444394	0.901904	positive	184
Cla97C01G006470	Cla97C01G006470.1	0.110712	0.144437	0.148432	0.149761	0.462627	0.149761	0.192947	-0.0387152	-0.00431025	-0.407571	-0.668261	-0.239819	0.984446	1.00727	1.01592	0.218871	0.21025	0.160901	-0.328356	-0.367474	-0.346641	-0.799484	-0.907105	-0.848597	0.683455	positive	185
Cla97C01G006550	Cla97C01G006550.1	0.423148	0.0228706	0.323147	-0.285866	0.00991868	-0.1749	-0.107487	0.0526472	-0.0795332	-0.0795332	-0.0356052	-0.0688068	0.408816	0.658494	0.305232	-0.380275	-0.245899	-0.218329	-0.332699	-0.123552	-0.0934976	0.0849995	0.0174143	-0.0807053	0.679486	positive	187
Cla97C01G006610	Cla97C01G006610.1	-0.267017	-0.477865	-0.368593	0.27878	0.284875	0.329195	0.246664	0.270203	0.245414	-0.211051	-0.121269	-0.209337	-0.678351	-0.813984	-0.786438	0.254944	0.298536	0.324525	0.139386	0.067039	0.151132	0.302953	0.353884	0.386374	0.659642	positive	188
Cla97C01G006660	Cla97C01G006660.1	0.821381	0.913228	0.677453	-0.283307	-0.122643	-0.20074	-0.292779	-0.313841	-0.0278455	-0.204311	-0.605707	-0.36089	0.728178	0.626697	0.67038	-0.00698365	-0.0485644	-0.0350143	-0.348077	-0.368785	-0.379673	-0.272093	-0.272322	-0.293742	0.920103	positive	190
Cla97C01G006670	Cla97C01G006670.1	1.04988	0.909625	0.912148	-0.213307	-0.180682	-0.154047	-0.487013	-0.250444	-0.195091	-0.498136	-0.351727	-0.541205	1.53839	1.45832	1.38721	-1.30298	-1.30532	-1.33761	-0.101425	-0.0253729	0.0244959	-0.214372	-0.0346269	-0.0867033	0.765605	positive	191
Cla97C01G006680	Cla97C01G006680.1	-0.349394	-0.440135	-0.353141	0.0586095	0.020021	0.035867	0.0698476	0.080999	0.0642395	0.271907	0.287635	0.253544	-0.030309	0.0115471	-0.000880335	0.31702	0.344351	0.336328	0.00791678	-0.0715793	-0.0398917	-0.309519	-0.293958	-0.271026	-0.316699	negative	192
Cla97C01G006700	Cla97C01G006700.1	0.109191	-0.090565	0.00629653	0.0600502	0.0669763	0.239969	-0.191092	0.0820976	-0.102949	0.0234887	-0.0450504	-0.158413	1.5717	1.57771	1.59459	0.824436	0.643726	0.840907	0.244504	0.310593	0.308039	-2.60538	-2.60892	-2.70191	0.338693	positive	193
Cla97C01G006780	Cla97C01G006780.1	-0.0756899	-0.0848693	-0.283667	0.0871006	0.0357932	0.0526342	0.081641	0.0372042	0.055422	-0.0864049	0.0258778	0.154958	-0.433921	-0.253542	-0.377131	0.319413	0.199297	0.27647	0.181068	0.0254333	0.128909	0.0430958	-0.0752048	-0.0338856	0.705915	positive	195
Cla97C01G006850	Cla97C01G006850.1	-0.145465	-0.156718	0.0221449	0.084911	0.0903603	0.0573515	0.10793	0.0656748	-0.0375212	-0.0751523	0.0106949	-0.0242107	-0.064934	-0.102384	0.0476805	0.0112582	0.037831	0.0363558	0.0189675	0.0983346	-0.0690591	0.0382166	-0.112916	0.0606485	0.565112	positive	197
Cla97C01G006880	Cla97C01G006880.1	-0.0307183	-0.134138	0.0519884	-0.149992	-0.112231	-0.000222355	0.0739938	0.0712614	0.049214	0.0712614	0.131522	-0.0219392	-0.665488	-0.720349	-0.577649	-0.100977	-0.0526078	-0.0387694	0.245473	0.227051	0.207074	0.481002	0.526996	0.468245	0.545884	positive	198
Cla97C01G006900	Cla97C01G006900.1	-0.0815807	0.222611	0.0484532	0.0442079	-0.00187011	0.00251276	0.00397077	-0.112843	0.012688	-0.0908884	-0.0570497	0.00978809	0.418619	0.410959	0.364184	-0.134261	-0.0478787	-0.10341	-0.21759	-0.207317	-0.150511	-0.129662	-0.0870495	-0.116083	0.444118	positive	199
Cla97C01G006940	Cla97C01G006940.1	0.582855	0.355445	0.548242	0.353016	0.14132	0.23399	0.104253	0.152536	0.135679	-1.2417	-0.547205	-0.818429	-0.147271	-0.121953	-0.0525949	0.673597	0.847183	0.729769	0.324111	0.317325	0.29691	-1.01923	-0.929239	-0.918605	0.734642	positive	201
Cla97C01G007020	Cla97C01G007020.1	-0.191528	-0.133846	-0.244619	0.103928	0.29005	0.081838	0.0494798	0.192921	0.0134645	0.133759	-0.522734	0.227288	0.0230352	-0.0135961	0.0549038	0.122717	0.144522	0.130539	-0.111806	-0.093449	-0.119162	-0.0250574	-0.0655148	-0.0471323	0.181901	positive	203
Cla97C01G007100	Cla97C01G007100.1	0.554734	0.496913	0.480733	0.359732	0.383133	0.297048	-0.194304	-0.287298	-0.229366	-0.709125	-0.611075	-0.541126	-1.06928	-1.05139	-1.04367	0.118434	0.0140527	0.11715	0.492578	0.434274	0.44736	0.475837	0.528731	0.535922	-0.81272	negative	204
Cla97C01G007220	Cla97C01G007220.1	0.617699	0.0389953	0.414955	0.0230538	0.0288711	0.0128167	-0.153444	-0.00787809	-0.0410103	-0.410562	-0.219147	-0.304349	0.5189	0.651702	0.385768	-0.15941	-0.0862173	-0.0659716	-0.115884	-0.143596	-0.158919	-0.237185	-0.27759	-0.311598	0.761453	positive	206
Cla97C01G007340	Cla97C01G007340.1	-0.488184	-0.677826	-0.399758	0.974009	0.976552	0.877501	0.589203	0.607918	0.556706	-1.17988	-0.985821	-0.85042	-1.64704	-0.535757	-0.914139	1.25745	1.62459	1.60627	-1.16369	-1.08757	-0.997915	0.613345	0.592965	0.651495	0.183776	positive	209
Cla97C01G007350	Cla97C01G007350.1	-0.852593	-0.313981	-0.531447	2.14006	1.85535	1.96533	-0.385717	0.0793614	-0.0785741	-1.86437	-0.937127	-1.07629	0.0157288	0.351737	0.156005	0.320725	0.448849	0.484482	-0.495275	-0.492893	-0.4637	-0.155726	-0.0919104	-0.0780228	0.564008	positive	210
Cla97C01G007510	Cla97C01G007510.1	-0.427073	-0.787069	-0.393405	-0.097152	-0.0640576	-0.0256244	0.0697587	-0.00903288	0.0796645	0.457199	0.688404	0.508387	-1.00209	-1.09517	-0.967928	0.387224	0.311788	0.419067	0.507234	0.560564	0.50536	0.0918111	0.144785	0.137359	0.644947	positive	212
Cla97C01G007530	Cla97C01G007530.1	0.681478	0.590823	0.589816	0.344592	0.134281	0.131517	-0.379307	-0.146814	-0.121867	-0.839724	-0.5265	-0.458295	0.0351621	-0.00948959	0.0567076	0.0558936	0.0399636	0.014392	-0.100017	-0.0710625	-0.103785	-0.0080668	0.045403	0.0448988	0.312145	positive	213
Cla97C01G007580	Cla97C01G007580.1	-0.163312	-0.203204	-0.188115	0.0383223	0.00952501	0.0425927	0.0679532	0.0693492	0.0804683	0.0525082	0.0873744	0.106538	1.16846	1.13034	1.20453	-0.874548	-0.881002	-0.856338	-0.20922	-0.238794	-0.172723	-0.12717	-0.0691815	-0.0743551	-0.814769	negative	214
Cla97C01G007610	Cla97C01G007610.1	-0.028091	-0.127206	-0.0729918	-0.0729918	-0.0251468	-0.154292	0.0756629	0.0423685	0.120223	0.0381521	0.0987901	0.105522	-0.832925	-0.89793	-0.900854	0.140729	0.0874133	0.128263	0.379346	0.424872	0.395149	0.356299	0.344338	0.375298	0.632562	positive	215
Cla97C01G007690	Cla97C01G007690.1	0.601185	0.341097	0.567354	-0.582078	-0.0893321	-0.319416	-0.437688	-0.22224	-0.245043	0.111819	0.213102	0.0612418	0.0547302	0.0744583	-0.00444749	0.234906	0.143172	0.170777	-0.141298	-0.162403	-0.167371	-0.0664834	-0.0534129	-0.0826274	-0.0582549	negative	217
Cla97C01G007780	Cla97C01G007780.1	0.0411974	-0.00872781	0.0551501	0.0453974	0.0537609	0.00139641	0.0285236	-0.00727714	0.025692	-0.107849	-0.0410173	-0.0862466	0.373494	0.395655	0.306313	0.154148	0.106401	0.156402	-0.17502	-0.199137	-0.294059	-0.270787	-0.331726	-0.221683	0.564804	positive	218
Cla97C01G007820	Cla97C01G007820.1	0.515374	0.638209	0.58953	-0.328668	-0.0381408	-0.162698	0.0276516	-0.268203	-0.0974807	-0.174421	-0.376223	-0.32493	0.172137	0.0227067	0.115309	-0.225546	-0.258822	-0.282852	-0.0885197	0.004798	-0.0241923	0.170139	0.202026	0.192817	0.178809	positive	219
Cla97C01G007860	Cla97C01G007860.1	0.460433	0.532849	0.855401	-0.167201	-0.0725105	-0.120712	0.116773	-0.215238	-0.399187	-0.294113	-0.140453	-0.556042	0.803067	0.815958	0.772419	-0.198765	-0.195291	-0.233796	-0.288516	-0.311673	-0.254992	-0.338625	-0.303316	-0.266471	0.888782	positive	220
Cla97C01G007890	Cla97C01G007890.1	-0.398243	-1.08719	-0.654472	-0.228095	-0.105093	-0.0583685	0.496693	0.489119	0.338321	0.259114	0.503152	0.445064	-1.14897	-1.2904	-1.12434	0.49276	0.423382	0.492909	0.554495	0.585106	0.529534	0.119535	0.183508	0.182476	0.802081	positive	221
Cla97C01G007940	Cla97C01G007940.1	0.407714	0.587155	0.588153	0.112669	0.0180796	0.0546425	0.00767373	0.0987303	-0.103954	-0.425883	-0.80379	-0.541192	0.453884	0.445397	0.324736	-0.127356	-0.0666501	-0.161585	-0.0209526	-0.231109	-0.232444	-0.135896	-0.11231	-0.135714	0.697148	positive	222
Cla97C01G008010	Cla97C01G008010.1	0.377652	0.155259	0.14345	0.0139611	0.0067368	0.0182784	-0.0078213	0.111478	0.0579621	-0.329384	-0.272027	-0.275545	1.99429	1.82427	1.88418	0.0404745	0.164866	0.00214541	-0.730623	-0.701981	-0.649461	-1.19134	-1.14629	-1.49052	0.818365	positive	223
Cla97C01G008030	Cla97C01G008030.1	0.0492954	-0.283176	-0.0826163	0.194419	0.0224341	0.109645	-0.227814	0.0673902	0.0492954	-0.0210239	0.180418	-0.0582664	-0.177293	-0.185148	-0.274862	-0.219932	-0.369429	-0.210418	0.213656	0.25197	0.144246	0.315881	0.321078	0.190253	0.0189485	positive	225
Cla97C01G008050	Cla97C01G008050.1	-0.328351	-0.673235	-0.350835	0.0186423	-0.090636	0.0504465	0.0331857	0.261561	0.0604207	0.282407	0.422675	0.313719	-0.334491	-0.334543	-0.263449	0.0175485	-0.00964314	-0.0133872	0.109267	0.00388924	0.0406904	0.262061	0.246816	0.275241	0.921279	positive	226
Cla97C01G008070	Cla97C01G008070.1	-0.282219	-0.169174	-0.101027	0.0709601	0.102221	0.0968327	0.126222	0.0873546	0.0709601	0.0654537	-0.0463502	-0.0212336	0.255547	0.187237	0.265746	0.0367876	0.0800344	0.0410723	-0.0972174	-0.170441	-0.142814	-0.185967	-0.143285	-0.126701	-0.662095	negative	227
Cla97C01G008100	Cla97C01G008100.1	-0.5698	-0.500716	-0.424432	-0.269954	-0.298041	-0.27181	0.0422986	0.251833	0.12501	0.673314	0.564171	0.678128	-0.838351	-0.837388	-0.889649	-0.327	-0.322333	-0.468136	0.521572	0.405284	0.440159	0.757773	0.781281	0.776787	0.951479	positive	228
Cla97C01G008120	Cla97C01G008120.1	0.211002	0.223547	0.229779	0.0750098	0.107862	0.0624948	-0.0357446	-0.0120204	-0.0149647	-0.223912	-0.357673	-0.265381	0.627834	0.666499	0.694598	-0.109862	-0.124725	-0.131472	-0.293431	-0.28026	-0.279039	-0.247549	-0.251707	-0.270887	0.743536	positive	230
Cla97C01G008130	Cla97C01G008130.1	-0.0545595	0.112008	-0.0470337	-0.0974453	-0.111505	-0.140043	-0.128878	-0.254987	-0.0575809	0.282978	0.243019	0.254027	0.0468038	0.0842712	0.0889149	-0.450943	-0.343434	-0.456477	0.00186835	0.0510559	0.15659	0.296995	0.250076	0.27428	0.646554	positive	231
Cla97C01G008150	Cla97C01G008150.1	-0.169333	-0.167706	-0.0994092	0.0153519	0.0210712	0.0196435	0.180334	0.166208	0.118989	-0.0121289	-0.0209169	-0.0521035	0.550745	0.563339	0.593254	0.0624687	-0.00820851	-0.00811189	-0.109692	-0.158498	-0.0890376	-0.455387	-0.451736	-0.489136	-0.532095	negative	232
Cla97C01G008170	Cla97C01G008170.1	0.256596	0.28224	0.24298	0.0560094	0.027412	0.00118041	-0.00323826	0.0417815	0.0128978	-0.246931	-0.365176	-0.305752	0.19713	0.289011	0.305551	-0.192464	-0.11821	-0.161781	-0.0816357	-0.0729006	-0.058722	-0.0843574	-0.024023	0.00240104	0.548169	positive	233
Cla97C01G008180	Cla97C01G008180.1	0.0181466	0.102048	0.265013	0.132959	-0.00654032	-0.000693521	0.0338982	0.0424181	-0.0050764	-0.177381	-0.151239	-0.253553	-0.0832441	-0.0489423	-0.0183168	-0.121986	-0.0697815	-0.129698	-0.100799	-0.00469812	0.0434157	0.189062	0.204418	0.14057	-0.707378	negative	234
Cla97C01G008190	Cla97C01G008190.1	0.521428	0.409818	0.594912	-0.111305	-0.112907	-0.277432	-0.0318707	0.0942915	-0.00484753	-0.375942	-0.343606	-0.362539	-0.216359	-0.180782	-0.230374	-0.0512857	-0.146832	-0.0747279	0.200042	0.247002	0.245995	0.150639	0.0235053	0.0331774	-0.508893	negative	235
Cla97C01G008240	Cla97C01G008240.1	-0.000788491	0.0235312	0.114245	-0.116386	-0.0611858	-0.0314077	0.0432558	0.00640701	0.053018	0.0291944	-0.034358	-0.0255252	0.270669	0.269678	0.245541	0.503085	0.602974	0.55236	-0.0736063	-0.0192575	-0.0858716	-0.756396	-0.847128	-0.662048	-0.186289	negative	236
Cla97C01G008310	Cla97C01G008310.1	-0.472558	-0.347197	-0.484888	0.130706	0.222046	0.218248	0.183606	0.0729903	0.169251	0.156075	0.0331893	0.118531	-0.864451	-0.917431	-0.941241	0.345288	0.320418	0.360549	0.179599	0.180656	0.20533	0.427307	0.375077	0.3289	0.961269	positive	238
Cla97C01G008360	Cla97C01G008360.1	0.381569	0.317029	0.42268	0.000688431	-0.0777218	-0.0995813	-0.0531386	0.0806208	-0.0425137	-0.32381	-0.287514	-0.318307	1.90209	1.88511	1.94973	-0.0125637	-0.0770791	-0.043324	-0.831234	-0.73415	-0.741222	-1.10663	-1.06149	-1.12924	0.917734	positive	239
Cla97C01G008440	Cla97C01G008440.1	-0.205629	0.0520767	0.0136406	0.0604808	-0.151244	-0.00523745	0.144571	0.0450358	0.0716106	-0.00231701	0.0618767	-0.084865	0.925552	0.950064	0.904846	-0.595888	-0.44101	-0.589746	-0.441734	-0.601274	-0.471496	0.130942	0.060729	0.169014	-0.333519	negative	241
Cla97C01G008450	Cla97C01G008450.1	0.21342	0.165903	0.15147	-0.068946	-0.107877	-0.133356	0.0867398	0.079827	0.119468	-0.172438	-0.13175	-0.20246	0.0649313	0.174454	0.138058	-0.302362	-0.209749	-0.253117	-0.0459352	-0.141557	-0.0345438	0.255744	0.161262	0.192814	0.0542614	positive	242
Cla97C01G008470	Cla97C01G008470.1	0.119768	0.110413	0.230009	-0.109301	-0.137683	-0.0876057	0.030472	0.0955879	0.0375406	-0.0332718	-0.0647174	-0.191212	0.0671843	0.256216	0.107561	-0.0948551	-0.110288	-0.0595233	0.0434831	-0.0763249	-0.0689758	-0.0601581	-0.0794291	0.0751103	0.50108	positive	243
Cla97C01G008480	Cla97C01G008480.1	-0.0794271	-0.025767	-0.050858	0.0469893	0.0245563	0.0622122	0.0372178	0.077276	0.0455974	0.00606908	-0.0568257	-0.0870403	-0.107974	-0.0715966	-0.0416644	0.0813646	0.186636	0.0748905	0.0241373	-0.0185823	-0.0151918	-0.0159454	-0.0374505	-0.0586231	0.615194	positive	244
Cla97C01G008620	Cla97C01G008620.1	0.231224	0.180464	0.207335	-0.0638355	-0.0869685	-0.0838626	0.00779176	0.0193914	-0.000969574	-0.17181	-0.142433	-0.0963265	-0.0715033	-0.12665	-0.090135	-0.266455	-0.244494	-0.223331	0.115368	0.0968379	0.124711	0.238817	0.257751	0.189083	-0.324826	negative	247
Cla97C01G008640	Cla97C01G008640.1	0.352613	0.431624	0.305608	-0.0463469	-0.0703424	-0.0538027	-0.0300785	-0.0840173	0.0275793	-0.292231	-0.318932	-0.221674	0.264184	0.190468	0.209252	-0.120705	-0.107023	-0.0857742	-0.16842	-0.145283	-0.142454	0.0609373	0.0159647	0.0288525	0.584936	positive	248
Cla97C01G008740	Cla97C01G008740.1	0.202832	0.416869	0.32201	-0.0531207	-0.0714021	-0.282342	-0.0335737	-0.0410604	-0.0637567	-0.0760089	-0.343974	0.0235267	-0.122915	-0.17179	-0.156537	-0.034043	-0.0714776	-0.0318311	-0.0284123	0.0266713	0.00578791	0.20604	0.19971	0.178797	-0.658413	negative	251
Cla97C01G008760	Cla97C01G008760.1	-0.588896	-0.219373	-0.468602	0.443227	0.328114	0.382826	0.317397	0.251364	0.276174	-0.265177	-0.290456	-0.166596	-2.65499	-2.53555	-2.50329	0.850529	0.847222	0.877762	0.967938	0.969168	0.976203	0.743271	0.731829	0.729905	0.729578	positive	252
Cla97C01G008790	Cla97C01G008790.1	0.0532731	0.0268816	0.0030102	0.0386708	-1.68818e-06	0.0532731	-0.747559	-0.610055	-0.547026	0.604427	0.605418	0.519688	1.30346	1.26158	1.34698	-0.417186	-0.309363	-0.412649	-0.647833	-0.647336	-0.689799	-0.290213	-0.231854	-0.265781	0.219127	positive	253
Cla97C01G008870	Cla97C01G008870.1	-0.595299	-0.617771	-0.492052	0.0256319	0.00076988	-0.00514281	0.275314	0.265524	0.245744	0.2995	0.304289	0.293491	-1.36063	-1.37364	-1.37997	0.451607	0.480586	0.406778	0.525699	0.457392	0.516339	0.455954	0.375913	0.443966	0.942759	positive	255
Cla97C01G008880	Cla97C01G008880.1	-0.72816	-1.01195	-0.993257	-0.061403	-0.0452653	-0.11935	0.558299	0.631402	0.698105	0.337314	0.35809	0.376177	-3.11189	-3.03447	-3.21735	1.53602	1.5743	1.55993	1.15597	1.09777	1.0822	0.415848	0.454275	0.487415	0.82732	positive	256
Cla97C01G008890	Cla97C01G008890.1	0.11925	0.206154	0.208707	0.14214	0.222671	-0.0954723	0.294143	0.209982	0.108351	-0.577124	-0.713089	-0.125712	-0.236064	-0.278017	-0.244679	-0.023562	-0.0788475	-0.0542203	0.0291903	0.0924524	0.0662149	0.216449	0.254275	0.256809	-0.668642	negative	257
Cla97C01G008920	Cla97C01G008920.1	-1.14071	-1.12549	-1.48482	-0.337191	-0.262423	-0.441747	0.837113	0.774571	0.859286	0.723982	0.794721	0.802703	-2.80245	-2.7005	-2.9043	0.714696	0.633022	0.697343	1.13777	1.09027	1.12488	1.00499	1.02637	0.977914	0.883479	positive	258
Cla97C01G008970	Cla97C01G008970.1	-0.294713	-0.164715	0.0840735	-0.121213	-0.21464	-0.197805	0.0977745	0.136787	0.206734	0.31157	0.0407545	0.115393	-1.06504	-0.985056	-0.911768	0.158713	0.251724	0.198012	0.335124	0.413973	0.375154	0.419125	0.409406	0.400628	0.509859	positive	260
Cla97C01G008980	Cla97C01G008980.1	-0.0234744	0.199544	0.147262	0.0168834	0.0168834	0.00259914	0.16019	0.0533737	-0.0161843	-0.156599	-0.239062	-0.161416	-0.172285	-0.129319	-0.0928513	0.10646	0.0730402	-0.0933045	-0.00972961	0.0133654	0.0892625	0.0808779	0.0720446	0.0624386	-0.519809	negative	261
Cla97C01G008990	Cla97C01G008990.1	-0.159123	-0.270617	-0.132951	-0.240615	-0.372192	-0.231908	-0.0648793	-0.261728	-0.15418	0.542078	0.745344	0.600769	0.152077	0.20952	0.0611952	-0.0235221	-0.131923	-0.0864864	-0.0591678	-0.128715	-0.210277	0.0933864	0.0724571	0.0514544	0.351356	positive	262
Cla97C01G009020	Cla97C01G009020.1	0.0772633	0.00638977	-0.0438731	-0.0866228	-0.151599	-0.105339	0.128891	0.281961	0.262628	-0.140296	-0.0696769	-0.159726	-0.351786	-0.231341	-0.214917	-0.0668314	0.0505982	-0.00981283	0.126758	0.0962272	0.0481589	0.14833	0.215012	0.189604	-0.0969814	negative	263
Cla97C01G009130	Cla97C01G009130.1	-0.252205	-0.367089	-0.623965	0.0182314	0.0775385	0.166834	0.0460186	0.0803701	0.0618646	0.238301	0.268411	0.285689	-0.329451	-0.334569	-0.352601	0.0580223	0.0718128	0.0830706	0.0897166	0.0828621	0.15488	0.163071	0.139584	0.173602	0.935338	positive	265
Cla97C01G009170	Cla97C01G009170.1	-0.124397	1.00768	0.489535	-0.103024	-0.0329452	-0.0997633	0.189891	-0.531177	-0.0313914	0.302599	-0.910787	-0.156217	1.55206	1.46799	1.54361	-0.0447751	0.109404	-0.0278364	-0.601641	-0.773465	-0.601972	-0.964465	-0.887293	-0.771623	0.575945	positive	266
Cla97C01G009280	Cla97C01G009280.1	-0.309018	-0.183487	-0.160298	-0.273039	0.0274095	-0.0835064	-0.203665	-0.168537	-0.119793	0.699156	0.431223	0.343555	-1.21249	-1.16268	-1.25368	-1.95023	-1.95623	-2.16751	0.616143	0.562513	0.571855	2.64198	2.62417	2.68615	0.769576	positive	269
Cla97C01G009380	Cla97C01G009380.1	0.197419	0.189779	0.133808	-0.0290007	0.00767375	-0.0499531	-0.0112806	0.000413063	0.102954	-0.222707	-0.153047	-0.166059	0.098784	0.146843	0.193325	0.0225232	0.0972699	0.00867706	-0.00827666	-0.0711869	-0.0705361	-0.123533	-0.153978	-0.139912	0.800368	positive	270
Cla97C01G009480	Cla97C01G009480.1	-0.130709	-0.074856	-0.151422	0.189953	0.146231	0.232388	0.0349912	0.0265048	0.0193944	-0.125971	-0.0809562	-0.0855483	-0.763059	-0.765518	-0.810369	-0.086781	-0.0655095	-0.0661817	0.362673	0.292171	0.318618	0.504324	0.541703	0.537929	0.148127	positive	271
Cla97C01G009510	Cla97C01G009510.1	-0.272031	-0.195144	-0.222801	-0.717565	-0.413585	-0.547058	-0.351211	-0.209828	-0.160857	1.1377	0.951461	1.00092	-0.783113	-0.693086	-0.810742	-0.550323	-0.513312	-0.601751	0.385161	0.316312	0.333564	0.992761	0.947987	0.976541	0.816607	positive	272
Cla97C01G009580	Cla97C01G009580.1	-0.027035	-0.019556	0.104731	0.407368	0.301477	0.331029	0.216624	0.187193	0.0230739	-0.658479	-0.415328	-0.451099	1.65733	1.72111	1.65654	0.0995207	0.129451	0.10974	-1.16705	-1.19236	-1.14417	-0.669847	-0.594524	-0.605745	0.160217	positive	273
Cla97C01G009690	Cla97C01G009690.1	-0.30383	-0.320214	-0.305641	0.269622	0.318654	0.237643	0.131875	0.114372	0.138552	-0.0796286	-0.101488	-0.0999156	0.315237	0.350663	0.232518	0.70522	0.850846	0.677906	0.00226442	-0.173465	-0.00968251	-0.956198	-1.01952	-0.975792	0.351237	positive	276
Cla97C01G009730	Cla97C01G009730.1	-0.213459	-0.186956	-0.104038	0.00773903	0.013464	-0.00377955	0.128721	0.11014	0.13004	0.0347326	0.0543044	0.0290916	-0.106361	-0.0451488	-0.0491253	0.172048	0.19119	0.16541	-0.100757	-0.0451882	9.19804e-05	-0.0203542	-0.0664108	-0.0953949	0.104588	positive	277
Cla97C01G009740	Cla97C01G009740.1	-0.091361	-0.0653382	-0.091361	-0.00444339	0.0200708	-0.0338272	0.0455808	0.0413603	0.0830194	-0.00735499	0.0385398	0.0651146	-0.0421958	-0.0814926	-0.0729094	0.0648137	0.0441076	0.12996	-0.103069	-0.112901	-0.0810665	0.103691	0.0681769	0.0828851	0.0544293	positive	278
Cla97C01G009760	Cla97C01G009760.1	-0.0819124	0.00183227	-0.0290051	0.193387	0.0768495	0.0727058	0.0461824	0.0960309	0.109577	-0.127269	-0.200601	-0.157778	0.812732	0.759108	0.703442	-0.0620295	0.0261226	-0.00647234	-0.217133	-0.321801	-0.294986	-0.483363	-0.520142	-0.395477	0.090572	positive	279
Cla97C01G009840	Cla97C01G009840.1	7.4299e-06	0.0186046	0.0771003	-0.0188327	7.4299e-06	0.0564802	0.116149	0.0879784	0.0578641	-0.11535	-0.0844888	-0.19552	0.626439	0.627982	0.65439	0.231284	0.294315	0.269446	-0.394137	-0.365255	-0.365172	-0.552451	-0.505665	-0.521176	0.364849	positive	284
Cla97C01G009850	Cla97C01G009850.1	-0.634858	-0.690307	-0.0979898	-0.139331	-0.252712	-0.135979	0.0724785	-0.0689412	0.0997406	0.689905	0.782247	0.375746	-0.499448	-0.493115	-0.484004	-0.088733	-0.0496777	-0.0949835	0.184221	0.192312	0.22804	0.371162	0.356319	0.377907	0.852931	positive	285
Cla97C01G009880	Cla97C01G009880.1	-0.189749	-0.120383	-0.00103412	0.224049	0.148938	0.18889	-0.1094	0.0375926	-0.112529	0.0248316	0.0119567	-0.103161	0.223202	0.288616	0.222471	-0.30651	-0.247755	-0.36571	-0.480181	-0.526039	-0.480523	0.624105	0.511527	0.536797	-0.306473	negative	286
Cla97C01G009920	Cla97C01G009920.1	-0.118562	-0.118562	-0.124966	0.282025	0.195998	0.257613	0.241521	0.235284	0.223988	-0.388322	-0.286092	-0.399925	-0.465861	-0.411498	-0.425046	0.191837	0.178183	0.127164	0.0822429	0.0494579	0.0840803	0.21939	0.154636	0.215413	0.144718	positive	287
Cla97C01G009950	Cla97C01G009950.1	-0.0340467	-0.293231	-0.162681	-0.000340716	-0.0992557	-0.125872	-0.0459575	0.0661808	-0.0325647	0.176648	0.257615	0.293505	0.623727	0.599994	0.645318	-0.353563	-0.323409	-0.353241	-0.361217	-0.436288	-0.481567	0.102835	0.192514	0.144896	-0.132855	negative	288
Cla97C01G009970	Cla97C01G009970.1	-0.664311	-0.838097	-0.458968	0.018499	0.10457	-0.122705	0.295996	0.385824	0.372007	0.355719	0.275114	0.276351	-0.832847	-0.734478	-0.819043	0.435423	0.45043	0.48018	0.225884	0.180167	0.124715	0.12821	0.185325	0.176035	0.796357	positive	289
Cla97C01G010040	Cla97C01G010040.1	0.17544	0.099214	0.131246	-0.0395047	0.0623074	-0.0217845	-0.115775	-0.163551	-0.0847812	-0.0756115	0.0399829	-0.00718223	0.229673	0.248121	0.20327	0.236281	0.265512	0.124645	-0.185933	-0.306732	-0.190764	-0.236872	-0.149187	-0.238013	0.742669	positive	291
Cla97C01G010050	Cla97C01G010050.1	-0.499144	-0.456258	-0.424418	-0.00397816	-0.0217346	0.00481878	0.293927	0.284325	0.235332	0.179446	0.206389	0.201296	-0.988797	-0.857848	-0.917688	0.254799	0.436672	0.351933	0.31629	0.292286	0.378033	0.262894	0.207532	0.263894	0.912805	positive	292
Cla97C01G010180	Cla97C01G010180.1	0.199472	0.3378	0.494976	0.153375	0.19037	0.0421298	-0.0335455	-0.0198994	-0.116635	-0.399166	-0.463385	-0.385491	-0.00976389	0.0820455	0.133821	-0.214933	-0.136275	-0.142885	-0.0665079	-0.0322769	-0.0397037	0.136671	0.164804	0.125004	-0.342461	negative	293
Cla97C01G010270	Cla97C01G010270.1	0.0650413	0.0299375	0.0454885	-0.0089593	-0.0265892	0.0327774	0.0993112	0.092522	0.114136	-0.15481	-0.159665	-0.12919	0.0437937	-0.0720174	-0.0131541	-0.166056	-0.0889926	-0.0939967	0.0217028	-0.0480371	-0.0607843	0.153828	0.12305	0.200663	-0.642801	negative	296
Cla97C01G010280	Cla97C01G010280.1	0.679697	0.419461	0.444957	0.0877137	0.0607201	-0.0729165	-0.287986	-0.120904	-0.0113193	-0.578304	-0.374536	-0.246583	-0.612038	-0.607972	-0.528477	0.384297	0.331648	0.416149	0.259713	0.258171	0.211765	-0.0918843	-0.00284288	-0.0185299	-0.596861	negative	297
Cla97C01G010290	Cla97C01G010290.1	-0.152736	-0.189304	-0.102733	0.208374	0.186486	0.145695	-0.434604	-0.235488	-0.295831	0.377021	0.218561	0.274559	-0.517733	-0.516012	-0.546086	0.150403	0.0713791	0.10863	0.171644	0.127169	0.173488	0.220118	0.251121	0.305879	0.382303	positive	298
Cla97C01G010340	Cla97C01G010340.1	0.239744	0.312378	0.299332	-0.0508671	-0.0554302	-0.00013628	-0.0297614	0.0245755	-0.0372638	-0.224974	-0.250907	-0.226689	0.902021	0.930988	0.864213	-0.453709	-0.324668	-0.417229	-0.25569	-0.260657	-0.162566	-0.207935	-0.439977	-0.174791	0.85548	positive	299
Cla97C01G010350	Cla97C01G010350.1	-0.276727	-0.249591	-0.361339	-0.137564	-0.098305	-0.106396	-0.233551	-0.147549	-0.295106	0.638661	0.567206	0.700263	-0.0135141	-0.0152535	0.101252	-0.109354	0.0446927	-0.0280137	-0.0793785	-0.0916925	-0.0565895	0.0916356	0.0361302	0.120085	0.581477	positive	300
Cla97C01G010380	Cla97C01G010380.1	0.632775	0.741568	0.667424	0.0647598	-0.116583	-0.139693	-0.209583	-0.133052	-0.131397	-0.460789	-0.553067	-0.362363	0.994613	0.925842	0.859694	-0.304684	-0.186745	-0.425087	-0.264611	-0.613969	-0.378841	-0.141878	-0.202887	-0.261449	0.862409	positive	301
Cla97C01G010390	Cla97C01G010390.1	0.65045	0.788581	0.637573	-0.0125153	0.0709008	0.0320681	-0.284948	-0.303931	-0.0329571	-0.487054	-0.504515	-0.553652	0.750014	0.737718	0.755167	-0.118542	0.0526391	-0.0481509	-0.425855	-0.446613	-0.400286	-0.222416	-0.280422	-0.353255	0.922865	positive	302
Cla97C01G010420	Cla97C01G010420.1	0.270399	0.38522	0.406461	-0.0567213	-0.0892123	0.0178147	0.0677893	-0.0130227	0.029391	-0.270724	-0.379415	-0.36798	0.365141	0.472439	0.243592	-0.176163	0.0182029	-0.162451	-0.22864	-0.142511	-0.20535	-0.0949866	-0.0785865	-0.0106861	0.628892	positive	304
Cla97C01G010520	Cla97C01G010520.1	-0.119047	-0.0475964	-0.0340216	0.00741251	-0.00724915	0.0882529	0.0978755	0.10471	0.114224	-0.0891046	-0.0310222	-0.0844332	0.328745	0.231376	0.0644994	0.0508454	0.0859212	0.129501	-0.320318	-0.198467	0.0746079	-0.234701	-0.0286314	-0.183378	-0.264353	negative	306
Cla97C01G010590	Cla97C01G010590.1	0.385422	0.288591	0.340121	-0.00822029	0.0236478	-0.0498251	0.0135841	0.0435669	0.0350638	-0.407236	-0.36536	-0.299355	0.498074	0.768059	0.506537	-0.339402	-0.234043	-0.232758	0.120675	0.062654	0.376368	-0.576045	-0.532665	-0.417453	0.898536	positive	308
Cla97C01G010600	Cla97C01G010600.1	0.474472	0.447824	0.165948	0.0230714	0.00709774	0.112656	-0.148479	-0.137138	-0.00316017	-0.394375	-0.341357	-0.20656	0.334302	0.465324	0.489895	-0.150624	-0.0851292	-0.154455	-0.196251	-0.198744	-0.27427	-0.0269652	-0.128633	-0.0744507	0.683945	positive	309
Cla97C01G010610	Cla97C01G010610.1	0.0492209	0.0699795	0.109285	0.0366209	-0.0222142	-0.0236796	-0.0804977	-0.0578015	-0.106659	-0.00909207	0.00103215	0.0338059	0.483746	0.510333	0.516746	-0.3495	-0.0107848	-0.272191	-0.127593	-0.265893	-0.194487	0.0039675	-0.239827	-0.0545174	0.686645	positive	310
Cla97C01G010740	Cla97C01G010740.1	-0.376103	-0.52576	-0.645683	0.395409	0.369291	0.371581	0.115622	-0.0113997	0.106027	-0.0974645	0.16926	0.12922	-1.38835	-1.45563	-1.41198	0.566739	0.480086	0.541441	0.517603	0.615859	0.490116	0.320028	0.370463	0.353625	0.901863	positive	313
Cla97C01G010840	Cla97C01G010840.1	0.724117	0.981983	0.88547	-0.15709	-0.233366	-0.139915	-0.0862899	-0.577321	-0.395117	-0.311976	-0.321626	-0.368867	2.19393	2.04226	1.85199	-0.942889	-0.830661	-0.964553	-0.616189	-0.867763	-0.667068	-0.183802	-0.727652	-0.287603	0.934272	positive	314
Cla97C01G010890	Cla97C01G010890.1	-0.531953	-0.412082	-0.644256	0.0830598	0.138685	0.133352	0.350008	0.242651	0.358033	0.137354	0.0579446	0.0872035	-1.12156	-0.912851	-0.962707	0.0716352	0.0970229	0.0346264	0.404097	0.424479	0.420806	0.510617	0.533074	0.500762	0.924519	positive	316
Cla97C01G010900	Cla97C01G010900.1	0.313407	0.298166	0.319227	-0.0568472	-0.0628899	-0.0448372	-0.0659208	-0.0478303	-0.0644046	-0.187733	-0.197671	-0.202666	-0.1013	-0.0847447	-0.0531752	0.189569	0.223351	0.211526	-0.00150555	0.0159262	0.0238514	-0.128701	-0.14743	-0.147367	-0.0911712	negative	317
Cla97C01G010920	Cla97C01G010920.1	0.305983	0.347972	0.378681	0.00286739	0.285721	0.101624	-0.197307	-0.198986	-0.0797666	-0.117363	-0.551037	-0.278388	-0.167883	-0.263253	-0.212226	0.23186	0.295406	0.212926	0.0426824	-0.0206743	0.0103181	-0.0196616	-0.0948398	-0.0146551	-0.112111	negative	318
Cla97C01G010950	Cla97C01G010950.1	0.271838	0.00368125	0.0470087	-0.104362	-0.0746471	-0.216026	-0.0110553	0.072394	0.028393	-0.0808523	0.100086	-0.0364581	-0.0460135	-0.0198738	-0.0585135	0.0102339	-0.0508744	-0.0510329	0.0388435	0.00432508	0.0536421	0.0439547	0.0144483	0.0608605	-0.0759392	negative	319
Cla97C01G011040	Cla97C01G011040.1	-0.402178	-0.417796	-0.326528	0.0981502	0.0249441	0.0662278	0.161266	0.148066	0.133406	0.16782	0.206535	0.140088	-0.551416	-0.571308	-0.511125	-0.100206	-0.0695299	0.00507649	0.147204	0.107834	0.111251	0.451755	0.49716	0.483305	0.914697	positive	320
Cla97C01G011050	Cla97C01G011050.1	-0.0835177	-0.127669	-0.168265	0.221854	0.162856	0.106796	-0.23742	-0.15189	-0.0167565	0.117643	0.0695721	0.106796	1.69021	1.71684	1.61421	0.0235426	0.0114988	0.0419139	-0.720586	-0.809118	-0.651332	-0.969714	-0.958394	-0.989072	-0.336825	negative	321
Cla97C01G011060	Cla97C01G011060.1	0.746858	0.856125	0.87216	-0.125325	-0.102055	-0.220558	-0.213416	-0.397436	-0.314861	-0.318688	-0.399461	-0.383341	0.433056	0.42804	0.481971	-0.207408	-0.0646214	-0.131053	-0.152335	-0.159079	-0.0876958	-0.0687569	-0.309004	-0.163115	0.967616	positive	322
Cla97C01G011200	Cla97C01G011200.1	-0.209475	-0.186151	-0.22467	0.0184255	0.0454191	0.00690694	0.149919	0.173294	0.152535	-0.0105452	0.00690694	0.0774339	0.148542	0.208102	0.232981	-0.341226	-0.373308	-0.292234	-0.0245166	0.0221185	-0.072451	0.17332	0.129857	0.188813	-0.422373	negative	324
Cla97C01G011330	Cla97C01G011330.1	-0.617543	-0.382743	-0.399952	0.0535217	0.0237158	0.00785392	0.183728	0.144698	0.144698	0.318428	0.261189	0.262405	-0.619079	-0.610577	-0.533833	0.146727	0.139584	0.146892	0.170208	0.115883	0.12481	0.338	0.292915	0.288471	0.968876	positive	325
Cla97C01G011390	Cla97C01G011390.1	0.117623	0.320374	0.174623	0.0369895	-0.00655593	0.0681076	-0.121542	-0.158723	-0.0109836	-0.153818	-0.104093	-0.162002	-0.102381	-0.0403417	0.00604702	-0.276028	-0.187007	-0.218908	-0.0040147	0.0529689	0.0286728	0.207928	0.247922	0.285143	-0.528708	negative	326
Cla97C01G011420	Cla97C01G011420.1	-0.155405	-0.485783	-0.358403	0.00683251	0.0836269	0.095813	0.0380425	0.169409	0.150061	0.0904096	0.199836	0.16556	-0.550772	-0.546693	-0.460242	0.30778	0.336535	0.321256	0.0696265	-0.00283597	0.0273242	0.195401	0.132198	0.170423	0.814646	positive	328
Cla97C01G011430	Cla97C01G011430.1	-0.130744	-0.0775363	-0.413359	0.0767696	-0.0790736	0.0190259	-0.154856	-0.0381325	-0.209366	0.278704	0.236071	0.492497	-0.267771	-0.301776	-0.171371	0.221626	0.279831	0.248693	-0.0124517	0.0393084	0.0822278	-0.0330243	-0.0337123	-0.0515794	0.137048	positive	329
Cla97C01G011440	Cla97C01G011440.1	-1.29475	-0.0989848	-1.31802	0.389318	0.105786	0.468518	0.619047	0.407166	0.617003	0.0124819	0.0598879	0.0325518	0.354762	0.355503	0.27626	-0.186477	-0.232959	-0.155113	-0.125912	-0.1374	-0.199687	-0.0316295	-0.0101708	0.0928235	-0.812936	negative	330
Cla97C01G011540	Cla97C01G011540.1	-0.310809	-0.340066	-0.415915	0.0465222	0.010757	-0.000877716	0.148787	0.219427	0.214405	0.135563	0.134234	0.157972	-0.255673	-0.268594	-0.248853	0.123015	0.231522	0.188003	0.0482705	-0.0455414	0.0693347	0.0589168	0.0684224	0.0311771	0.742133	positive	332
Cla97C01G011550	Cla97C01G011550.1	-0.228966	-0.222153	-0.240967	-0.0478919	-0.183589	-0.309722	0.195431	0.0411646	0.146258	0.147574	0.347434	0.355427	-0.830915	-0.769457	-0.713445	-0.128281	-0.148597	-0.198173	0.418499	0.465224	0.359306	0.551502	0.496131	0.498205	0.860888	positive	333
Cla97C01G011580	Cla97C01G011580.1	0.133817	-0.208812	0.171768	0.0336186	0.0421217	0.0975635	-0.112868	0.189738	-0.112868	-0.0229081	-0.00236072	-0.208812	0.821513	0.851724	0.710932	-0.219337	-0.158997	-0.160388	-0.257899	-0.233568	-0.194678	-0.35522	-0.40422	-0.399862	0.167538	positive	334
Cla97C01G011590	Cla97C01G011590.1	0.744837	0.543158	0.550389	0.185315	0.161225	0.104803	-0.558747	-0.237264	-0.193462	-0.527957	-0.396996	-0.375301	0.833503	0.920206	1.1347	-0.198688	0.0678401	-0.19497	-0.262963	-0.242046	-0.193558	-0.58636	-0.549621	-0.728047	0.894921	positive	335
Cla97C01G011660	Cla97C01G011660.1	0.154878	0.150956	0.169169	-0.0227377	0.0757147	0.101685	0.0935345	-0.0480618	-0.0168431	-0.208438	-0.16379	-0.286067	-0.165245	-0.204521	-0.229277	0.0663907	0.143645	0.10636	0.0760271	0.0458456	0.078628	-0.0323934	0.0191533	0.0953868	-0.440579	negative	336
Cla97C01G011720	Cla97C01G011720.1	0.0272442	0.0786009	-0.0186963	0.021581	0.0496772	0.018741	-0.0797797	-0.127745	-0.0201558	-0.00852106	0.069024	-0.00997028	-0.055267	-0.0782241	-0.0483596	0.121541	-0.0248849	0.0249372	0.0123247	-0.0803702	0.0184242	0.0198885	0.0387877	0.0512025	0.155036	positive	337
Cla97C01G011850	Cla97C01G011850.1	1.05505	1.00278	1.02486	-0.154883	-0.218288	-0.179912	-0.437905	-0.372557	-0.364336	-0.515429	-0.364336	-0.47504	0.39183	0.344701	0.448484	0.0508208	0.0392245	-0.0502298	-0.123512	-0.173587	-0.158194	-0.246718	-0.288714	-0.234105	0.957611	positive	338
Cla97C01G011880	Cla97C01G011880.1	-0.0500913	-0.0440738	-0.00409916	0.046124	-0.169468	0.190917	0.250882	0.231169	0.209925	-0.236504	0.00608633	-0.430866	-0.817757	-0.852641	-0.749633	-0.151779	-0.126566	-0.119497	0.154857	0.263118	0.228714	0.727087	0.73096	0.713137	-0.190988	negative	340
Cla97C01G011910	Cla97C01G011910.1	0.214327	0.396297	0.424693	-0.11136	-0.0787991	-0.0942127	-0.0559832	-0.074207	-0.0818687	-0.0484574	-0.235751	-0.254677	0.644066	0.578679	0.368921	-0.161717	-0.34737	-0.298554	-0.186675	-0.435979	-0.470093	-0.0577994	0.144342	0.222179	0.62267	positive	342
Cla97C01G012160	Cla97C01G012160.1	0.501962	0.731163	0.5009	-0.202464	-0.262512	-0.308315	0.0332113	-0.048387	0.0507341	-0.355621	-0.422552	-0.218118	0.483643	0.472318	0.420759	-0.191444	-0.356579	-0.246025	-0.0718894	-0.124491	-0.170339	-0.0340307	-0.133618	-0.0483048	0.886339	positive	343
Cla97C01G012170	Cla97C01G012170.1	-0.329922	-0.335629	-0.28691	-0.0232611	-0.11678	-0.0876007	-0.134906	-0.246933	-0.144891	0.425527	0.698274	0.58303	-0.866924	-0.900808	-0.890512	-0.00111524	0.0468288	-0.00371754	0.264454	0.279749	0.289196	0.598573	0.587324	0.596952	0.745153	positive	344
Cla97C01G012270	Cla97C01G012270.1	0.521863	0.534409	0.714246	0.0649233	0.00608964	0.108924	-0.0789357	-0.0773442	-0.137431	-0.492912	-0.289434	-0.874397	1.43964	1.47442	1.44648	0.123408	0.19912	0.115076	-0.668916	-0.704723	-0.779743	-0.925845	-0.863327	-0.855603	0.894476	positive	347
Cla97C01G012280	Cla97C01G012280.1	0.399278	0.478633	0.361921	-0.0569443	-0.161856	-0.138956	0.072032	0.0104486	0.0970505	-0.403614	-0.363243	-0.29475	-0.23592	-0.131307	-0.198531	-0.313312	-0.170512	-0.251811	0.123436	0.105331	0.210402	0.299653	0.269141	0.293428	-0.546447	negative	348
Cla97C01G012520	Cla97C01G012520.1	0.197772	0.39343	0.265983	0.0896842	0.0522456	0.120828	0.0224397	0.0195686	-0.0831523	-0.300923	-0.466146	-0.31173	0.198293	0.364517	0.315849	-0.283266	-0.257335	-0.197959	-0.000777966	0.0767391	0.00230369	-0.144226	-0.0350726	-0.039065	0.473593	positive	353
Cla97C01G012650	Cla97C01G012650.1	-0.401494	-0.270333	-0.199692	0.141611	0.231648	0.0708897	0.367223	0.290292	0.170518	-0.252782	-0.164806	0.0169243	-1.42276	-1.26542	-1.3067	-0.069907	0.261103	0.0843739	0.395638	0.677652	0.550342	0.761821	0.731118	0.602745	0.586454	positive	355
Cla97C01G012760	Cla97C01G012760.1	0.222568	0.459911	0.244936	-0.0495115	0.029923	0.00392776	0.00538429	-0.069306	-0.164359	-0.128775	-0.512729	-0.0419699	-2.44374	-2.50093	-2.42381	0.312451	0.184162	0.242889	1.12168	1.06049	1.11284	1.13128	1.09294	1.10975	-0.816522	negative	359
Cla97C01G012850	Cla97C01G012850.1	-0.512485	-0.618744	-0.351122	-0.170213	-0.0124979	-0.190557	-0.0820575	-0.0399206	0.0553021	0.647923	0.705938	0.568435	-0.810588	-0.743747	-0.681942	-0.0611881	-0.118543	0.00790238	0.331221	0.334351	0.315001	0.446473	0.47275	0.508309	0.849357	positive	361
Cla97C01G012980	Cla97C01G012980.1	0.517869	0.581227	0.551938	-0.0540939	-0.0587603	-0.155405	-0.450104	-0.437895	-0.427799	0.027419	-0.0618796	-0.0325147	0.959059	0.922577	1.00809	-0.639103	-0.590277	-0.626295	-0.228967	-0.217959	-0.21649	-0.12026	-0.131818	-0.11856	0.81945	positive	362
Cla97C01G013030	Cla97C01G013030.1	0.158002	0.0807911	0.0848877	-0.202348	-0.15972	0.0377638	0.0419843	0.0957555	-0.0643907	-0.00658629	-0.0167924	-0.0493469	-0.276485	-0.220759	-0.208966	-0.00278126	0.00504798	-0.0015352	0.0343919	0.0516809	0.148815	0.124877	0.157142	0.188571	-0.520443	negative	363
Cla97C01G013150	Cla97C01G013150.1	0.111377	0.0831009	0.0858178	-0.0139118	-0.0672413	-0.143149	0.0831009	0.0403205	0.0776516	-0.110127	-0.0962028	-0.050736	-1.64912	-1.42878	-1.52464	0.104112	0.138595	0.128353	0.626701	0.693555	0.65377	0.723524	0.747393	0.786528	-0.546489	negative	365
Cla97C01G013290	Cla97C01G013290.1	-0.724285	-0.951758	-0.512436	0.210893	0.186825	0.147184	0.0863258	0.0273117	0.0659443	0.496295	0.561182	0.406518	-2.0564	-2.06043	-2.10585	1.11911	1.02178	1.09824	0.887408	0.878337	0.853897	0.128137	0.12735	0.108423	0.791538	positive	366
Cla97C01G013460	Cla97C01G013460.1	-0.138791	-0.137187	-0.169608	0.0433856	0.0119282	0.0602594	0.189862	0.226452	0.230184	-0.0976583	-0.114917	-0.10391	0.0935171	0.176842	0.0841944	0.1538	0.140834	0.132195	-0.0326441	-0.177142	-0.0916055	-0.184489	-0.164355	-0.131146	-0.220101	negative	370
Cla97C01G013480	Cla97C01G013480.1	0.396784	0.628322	0.140157	-0.0405978	-0.0960015	-0.102471	-0.104093	-0.120413	-0.00380014	-0.182456	-0.398295	-0.117134	1.16662	1.14733	1.00619	0.0164137	-0.0535023	-0.0246933	-0.319552	-0.369488	-0.343144	-0.690493	-0.794101	-0.741581	0.894469	positive	371
Cla97C01G013600	Cla97C01G013600.1	-0.12701	-0.293368	-0.173787	-0.173787	-0.188618	-0.162356	0.142886	0.192059	0.24207	0.180563	0.219779	0.141569	-0.671016	-0.855875	-0.704429	-0.0897126	-0.10024	-0.193825	0.489746	0.481009	0.414794	0.434532	0.418701	0.376314	0.896324	positive	373
Cla97C01G013720	Cla97C01G013720.1	-0.0131935	0.299929	0.241035	-0.0367964	-0.0698941	-0.0929041	0.0469872	-0.0668537	0.034301	0.0300473	-0.182204	-0.190453	-0.395293	-0.555516	-0.462462	0.0246108	-0.0355066	0.0500805	0.19887	0.0836601	-0.01607	0.329249	0.329668	0.448709	-0.775756	negative	374
Cla97C01G013740	Cla97C01G013740.1	0.128283	0.250384	0.212114	0.292564	0.21985	0.257918	0.104801	-0.00211381	0.0638411	-0.605945	-0.448483	-0.473215	0.695725	0.74428	0.661385	0.284319	0.286284	0.186147	-0.211514	-0.316555	-0.256281	-0.745536	-0.710458	-0.617797	0.842645	positive	376
Cla97C01G013780	Cla97C01G013780.1	-0.110306	0.0637233	-0.176119	0.105869	0.108636	0.292618	0.506994	0.347516	0.482676	-0.497206	-0.443537	-0.680866	0.144572	0.343826	0.297516	-0.372132	-0.315828	-0.264257	-0.0569781	-0.106109	-0.107404	0.0981738	0.236478	0.102142	-0.520977	negative	378
Cla97C01G013850	Cla97C01G013850.1	0.104296	0.0676668	0.0935393	-0.0114048	-0.0186801	0.0187572	0.0385204	0.0469082	0.0272603	-0.19043	-0.0752053	-0.101228	0.634246	0.64889	0.612025	-0.173535	-0.198477	-0.159066	-0.261209	-0.298503	-0.259391	-0.16007	-0.243916	-0.140995	0.555004	positive	379
Cla97C01G013860	Cla97C01G013860.1	0.186193	0.0139751	0.0575644	-0.101133	-0.101133	-0.091579	-0.480924	-0.439935	-0.405988	0.399957	0.527368	0.435636	-0.156171	-0.0948659	-0.0467673	-0.0445333	-0.00734792	-0.00132187	0.106884	0.0454353	0.0210801	0.0330893	0.0786063	0.0659129	-0.0852203	negative	380
Cla97C01G013880	Cla97C01G013880.1	0.136571	0.17333	0.184949	0.214224	0.215483	0.230511	0.0615203	0.0417764	0.0417764	-0.367592	-0.445071	-0.487477	-0.277851	-0.244374	-0.166795	0.0203247	0.0878863	0.0768843	0.0805053	0.0536086	0.074458	0.0510275	0.121971	0.122355	-0.450813	negative	382
Cla97C01G013930	Cla97C01G013930.1	0.238739	0.305458	0.243697	0.010541	0.0307593	-0.00407612	0.0605651	0.00178851	0.0689692	-0.351198	-0.356816	-0.248427	0.764381	0.74011	0.725931	-0.111192	-0.189157	-0.19127	-0.26885	-0.282975	-0.319522	-0.294119	-0.274818	-0.29852	0.746199	positive	384
Cla97C01G013980	Cla97C01G013980.1	-1.12533	-1.18069	-0.882234	0.315779	0.262293	0.294368	0.313277	0.34425	0.26359	0.459633	0.468657	0.466407	-0.505399	-0.51506	-0.376835	0.719427	0.670926	0.699553	0.355342	0.411043	0.341237	-0.584547	-0.590641	-0.625046	0.397187	positive	385
Cla97C01G013990	Cla97C01G013990.1	-0.642614	-0.3249	-0.472948	0.63419	0.371348	0.50822	0.214964	0.248131	0.205903	-0.323026	-0.195778	-0.22349	-0.674937	-0.7478	-0.636795	0.385277	0.315151	0.357969	0.375968	0.405672	0.355988	-0.0825481	-0.00762583	-0.0463191	0.883816	positive	386
Cla97C01G014090	Cla97C01G014090.1	-0.0909867	0.152766	-0.125563	-0.0724706	-0.0709382	-0.00654156	-0.109744	-0.11605	-0.125563	0.206825	0.0787657	0.279499	0.118287	0.255422	0.213895	-0.0280948	-0.128761	-0.0604187	-0.0222642	-0.0270223	-0.0301012	-0.0303727	-0.16746	-0.09311	-0.113067	negative	388
Cla97C01G014130	Cla97C01G014130.1	-0.00193301	0.0311018	-0.0431978	0.192164	-0.0077562	0.0592254	0.0522457	0.245765	0.143079	-0.243337	-0.285158	-0.1422	-0.547927	-0.507663	-0.44029	0.565475	0.511402	0.511791	0.0874309	0.0128513	-0.0023639	-0.0995767	-0.0469713	-0.0441581	0.279448	positive	390
Cla97C01G014170	Cla97C01G014170.1	-0.379912	-0.634485	-0.515296	0.319934	0.335288	0.378115	0.201188	0.282647	0.208903	-0.0365422	-0.0274496	-0.132391	-0.580693	-0.638442	-0.638074	0.280174	0.290274	0.320737	0.143298	0.0845343	0.139092	0.198939	0.202331	0.19783	0.891424	positive	391
Cla97C01G014180	Cla97C01G014180.1	1.00609	0.923446	0.709922	-0.563983	-0.484382	-0.327298	-0.648235	-0.430098	-0.377783	0.0541107	-0.0798932	0.218099	1.12846	1.10257	1.14481	-0.39074	-0.380746	-0.406321	-0.445604	-0.447448	-0.449207	-0.261574	-0.279234	-0.314959	0.925224	positive	392
Cla97C01G014260	Cla97C01G014260.1	1.50795	1.4657	1.27797	0.0851104	0.0783292	0.149608	-0.648477	-0.444277	-0.198021	-1.2125	-1.24615	-0.815241	5.42512	5.76412	5.71048	-0.21985	-0.150475	-0.211396	-2.47247	-2.34356	-1.83064	-3.2814	-3.37775	-3.01218	0.975957	positive	393
Cla97C01G014290	Cla97C01G014290.1	0.0164471	-0.219393	-0.102197	-0.217675	-0.00414214	-0.535315	0.176604	0.166112	-0.304386	0.130126	0.159515	0.734304	-0.913837	-0.965825	-0.926328	-0.140255	-0.0632846	-0.242807	0.435742	0.526327	0.570507	0.577658	0.50826	0.633842	0.473306	positive	394
Cla97C01G014300	Cla97C01G014300.1	-0.000362967	0.0321857	0.108493	0.070844	0.0722057	0.0195366	0.117754	0.0405573	0.100508	-0.152684	-0.211114	-0.197924	-1.3364	-1.45245	-1.43008	-0.151368	-0.210617	-0.138121	0.434934	0.456613	0.479138	1.12439	1.11364	1.11033	-0.580015	negative	395
Cla97C01G014310	Cla97C01G014310.1	-0.0631589	0.0363768	-0.066193	0.0278653	0.108113	0.0713106	0.142686	0.167437	0.20693	-0.283784	-0.209784	-0.137798	0.315552	0.391697	0.342253	-0.0688521	0.101908	0.013116	0.0619538	0.0333168	-0.0553567	-0.425271	-0.264516	-0.445801	0.472955	positive	396
Cla97C01G014460	Cla97C01G014460.1	0.543996	0.398751	0.512152	-0.0043515	-0.0374147	-0.0743694	-0.112296	-0.0496281	-0.109097	-0.524667	-0.24293	-0.300145	-0.00524041	-0.0379714	-0.0506288	-0.0436476	-0.022864	-0.0548059	0.0493892	-0.0101892	0.037237	0.0453203	0.0193571	0.0740438	-0.623092	negative	398
Cla97C01G014540	Cla97C01G014540.1	0.457519	0.263639	0.436854	0.161277	0.119574	0.142593	-0.0619993	-0.0682045	-0.06976	-0.595269	-0.271549	-0.514674	0.282775	0.310729	0.323358	-0.0474316	0.0397592	-0.0522562	-0.20607	-0.230116	-0.256892	0.0317287	-0.115199	-0.0803857	0.580377	positive	399
Cla97C01G014550	Cla97C01G014550.1	-0.139195	-0.0815109	0.0554368	0.0512611	0.0554368	-0.0482745	0.123309	0.0470733	0.0442747	-0.0408264	-0.0187101	-0.0482745	-0.594656	-0.633149	-0.596123	0.167076	0.128822	0.117742	0.145168	0.179139	0.169976	0.325074	0.300859	0.290072	0.368004	positive	400
Cla97C01G014610	Cla97C01G014610.1	-0.284079	-0.259266	-0.298452	0.235669	0.246848	0.24189	0.204154	0.229421	0.235669	-0.202412	-0.221115	-0.128327	1.05948	1.03654	0.913217	0.259548	-0.0927942	0.121206	-0.248931	-0.22129	-0.302285	-0.901492	-0.800714	-0.822489	-0.252722	negative	402
Cla97C01G014690	Cla97C01G014690.1	0.349484	0.106608	-0.146474	0.000212166	-0.00415303	0.154393	-0.00415303	-0.00124143	0.0875895	-0.402769	-0.0651735	-0.0743238	0.933157	0.890249	0.859595	0.0188639	0.0884112	0.0476341	-0.343833	-0.193076	-0.34377	-0.541673	-0.743975	-0.671584	0.493869	positive	403
Cla97C01G014740	Cla97C01G014740.1	0.337199	0.799782	0.55427	-0.166438	-0.107896	-0.207431	-0.242197	-0.220142	-0.34783	0.0801017	-0.298854	-0.180565	0.0270419	0.04754	-0.0460804	-0.0498711	-0.0205899	-0.0399422	-0.0300398	0.00541436	0.0347369	0.0498265	0.0185616	0.00340216	0.217896	positive	405
Cla97C01G014750	Cla97C01G014750.1	-0.260625	0.153109	0.124149	0.235427	0.110791	-0.024165	0.00501083	-0.0751595	-0.0905075	0.00356597	-0.189492	0.00789623	-0.657411	-0.67307	-0.601454	0.262327	0.284382	0.319823	0.199573	0.252787	0.224033	0.165713	0.0472465	0.17605	0.0546128	positive	406
Cla97C01G014770	Cla97C01G014770.1	-0.00270779	-0.00120106	0.256049	-0.150195	-0.476723	-0.478818	-0.243305	-0.284863	-0.504203	0.513824	0.735162	0.636982	1.19205	1.18697	1.23578	-0.811603	-0.837669	-0.853691	-0.100785	-0.126192	-0.215563	-0.215891	-0.251411	-0.201995	0.260549	positive	407
Cla97C01G014810	Cla97C01G014810.1	0.375876	0.513172	0.582174	0.0828084	0.0021577	0.0256645	-0.046037	-0.0645334	-0.0738712	-0.50566	-0.435772	-0.455978	0.291093	0.350471	0.36249	-0.312198	-0.369096	-0.279268	0.000646433	0.0336408	-0.0647695	0.0394588	-0.0631296	0.0106618	0.48734	positive	408
Cla97C01G014900	Cla97C01G014900.1	0.492042	0.305666	0.621233	0.352499	0.0816452	0.0190045	-0.187103	-0.0907767	-0.223629	-0.684602	-0.356384	-0.329596	1.19573	1.20568	1.15912	-0.0323579	-0.0754529	-0.0618263	-0.597187	-0.626045	-0.593641	-0.46292	-0.577731	-0.53337	0.83294	positive	409
Cla97C01G014970	Cla97C01G014970.1	0.050772	-0.0810057	-0.0581898	-0.0136128	0.015358	-0.0327606	0.0605341	0.116423	0.077117	-0.0794734	-0.0283193	-0.0268419	0.531439	0.455661	0.40553	-0.113517	-0.127965	-0.115365	-0.105805	-0.204342	-0.168424	-0.163914	-0.20647	-0.186829	-0.248092	negative	412
Cla97C01G015030	Cla97C01G015030.1	0.161458	0.319411	0.267427	0.212221	0.283341	0.218602	0.104716	0.110217	0.0312228	-0.403768	-0.826668	-0.478181	0.00946831	0.174746	-0.0607353	-0.54829	-0.261223	-0.546674	0.133534	-0.0195163	0.134926	0.314334	0.358276	0.311155	-0.659425	negative	413
Cla97C01G015200	Cla97C01G015200.1	0.108922	0.0926052	0.199325	0.0926052	0.158102	0.127729	0.091237	0.0339963	-0.0241261	-0.180584	-0.380567	-0.319245	0.0398122	0.0313834	0.0691509	0.022962	0.122167	0.125069	-0.0436194	-0.0997891	-0.0873171	-0.0841554	-0.075336	-0.0203283	0.614323	positive	415
Cla97C01G015280	Cla97C01G015280.1	0.279558	0.421845	0.481672	0.0898868	0.228407	0.300247	-0.0680309	-0.0417572	-0.156469	-0.163117	-0.638252	-0.733988	0.473976	0.427548	0.481992	0.0765621	0.102903	0.0946878	-0.167561	-0.191311	-0.131889	-0.412009	-0.420155	-0.334744	0.870595	positive	417
Cla97C01G015370	Cla97C01G015370.1	0.944839	1.10203	0.97061	-0.391843	-0.381289	-0.398212	0.0716276	-0.0585199	-0.0754333	-0.437032	-0.860839	-0.485941	-0.340116	-0.225823	-0.413044	-0.148269	-0.163634	-0.144259	0.823054	0.757241	0.816568	-0.296824	-0.327795	-0.3371	-0.0752466	negative	418
Cla97C01G015440	Cla97C01G015440.1	0.182834	0.138759	0.154469	-0.09354	-0.102848	0.0050676	0.0658663	-0.00362336	0.0421349	-0.174638	-0.0167588	-0.197722	-0.343566	-0.173124	-0.258831	0.115479	0.189724	0.21671	0.151069	0.198463	0.127906	-0.127791	-0.0344712	-0.0615662	-0.400019	negative	420
Cla97C01G015590	Cla97C01G015590.1	0.453934	0.361615	0.369633	0.0240961	0.0599324	0.0935175	0.00215915	0.0712146	-0.0201166	-0.506741	-0.487991	-0.421253	-0.08979	-0.0418358	-0.142122	0.0499299	0.0136639	0.0467444	0.0692943	0.116506	0.0892676	0.00367597	-0.0571088	-0.058225	-0.15951	negative	425
Cla97C01G015610	Cla97C01G015610.1	-0.759951	-0.791953	-0.775863	-0.233296	-0.200712	-0.293106	0.263593	0.259695	0.266185	0.78037	0.657392	0.827646	-2.95105	-2.92932	-3.1009	0.823829	0.81158	0.773617	1.31123	1.2919	1.31279	0.870633	0.851986	0.9337	0.790261	positive	426
Cla97C01G015620	Cla97C01G015620.1	-1.06107	-1.77759	-0.147429	-0.840568	-1.56873	-0.19747	0.00574452	-0.236796	0.202333	1.93396	2.13316	1.55445	-4.51779	-4.5498	-4.45228	-1.18696	-1.09393	-1.10474	1.71017	1.71004	1.70972	3.92522	3.91795	3.9324	0.821633	positive	427
Cla97C01G015650	Cla97C01G015650.1	0.360407	0.391583	0.376656	0.251335	0.236149	0.202686	0.0931642	0.201383	0.109924	-0.591384	-0.95686	-0.675042	-0.165596	-0.14347	-0.248526	-0.0979053	-0.152926	-0.0899606	0.0988443	0.085429	-0.019261	0.260799	0.194036	0.278535	-0.868235	negative	428
Cla97C01G015680	Cla97C01G015680.1	0.698912	0.56018	0.597147	-0.0320825	0.000478352	0.0338194	-0.0750562	-0.161611	-0.17194	-0.548898	-0.548898	-0.352052	2.94566	2.88013	2.91043	-0.616316	-0.710414	-0.665452	-1.23817	-1.33644	-1.22277	-0.925207	-1.08456	-0.936891	0.897561	positive	429
Cla97C01G015720	Cla97C01G015720.1	-0.227194	0.125022	-0.168231	-0.0989428	-0.0540244	-0.124337	-0.166582	-0.383215	-0.163288	0.479186	0.324722	0.456884	-0.626785	-0.42491	-0.475232	0.055315	0.0387534	0.00315966	0.194967	0.166162	0.201912	0.276306	0.278923	0.311428	0.395636	positive	430
Cla97C01G015830	Cla97C01G015830.1	-0.114691	-0.214679	-0.302142	-0.216377	-0.280662	-0.159728	0.0929211	0.162527	0.10657	0.247527	0.349771	0.328963	-0.486273	-0.514865	-0.516448	-0.261896	-0.245237	-0.235906	0.243002	0.227947	0.168396	0.56041	0.521563	0.539308	0.945842	positive	431
Cla97C01G015880	Cla97C01G015880.1	0.477027	0.4038	0.258654	0.110852	0.112205	0.0244042	-0.170706	-0.0938298	-0.0178809	-0.481573	-0.384897	-0.238056	0.102117	0.0099231	0.206479	0.0535892	0.112427	0.0328515	-0.166281	-0.155871	-0.136251	-0.0282569	-0.0181362	-0.0125917	0.528236	positive	433
Cla97C01G015960	Cla97C01G015960.1	-0.445437	-0.482326	-0.301143	0.336548	0.522854	0.406601	-0.256083	-0.378231	-0.0344517	0.362207	0.26044	0.00901977	0.411518	0.46469	0.415652	0.716059	0.689558	0.710478	-0.272062	-0.383526	-0.37235	-0.77727	-0.833367	-0.769381	0.0316175	positive	434
Cla97C01G016020	Cla97C01G016020.1	0.133055	0.121148	0.134372	-0.0373641	0.0377481	-0.205437	-0.028495	-0.0314453	0.0447686	-0.0917548	-0.0902159	0.0136199	-0.0265467	0.034973	-0.0595088	0.158703	0.134329	0.16922	-0.115565	-0.0518579	-0.0605946	-0.0274702	-0.00498208	-0.1507	-0.336448	negative	435
Cla97C01G016030	Cla97C01G016030.1	0.0239229	-0.0976866	0.138735	0.0267996	-0.022903	0.031104	0.0195969	0.206273	-0.0110533	-0.15521	-0.0759214	-0.083657	-0.529116	-0.608135	-0.581652	0.0861473	0.0573303	0.10684	0.206511	0.1649	0.137829	0.31005	0.317404	0.331891	-0.235088	negative	436
Cla97C01G016090	Cla97C01G016090.1	0.551022	0.626679	0.433472	0.337063	0.406251	0.263126	-0.325001	-0.401104	-0.154865	-0.553107	-0.784433	-0.399102	-0.0128064	-0.173535	-0.131605	-0.134174	-0.186486	-0.116373	-0.0727178	0.0618859	-0.105779	0.208249	0.36923	0.294111	-0.81439	negative	438
Cla97C01G016210	Cla97C01G016210.1	0.230301	0.216567	0.237737	-0.159689	-0.0590679	-0.14028	0.0420867	0.0645634	0.0163746	-0.124303	-0.156436	-0.167853	0.720998	0.747141	0.656443	-0.332701	-0.195674	-0.345748	-0.130641	-0.1471	-0.114577	-0.353874	-0.246239	-0.258029	0.925721	positive	440
Cla97C01G016230	Cla97C01G016230.1	-0.169506	-0.501776	-0.263165	0.104478	-0.0148676	0.0417729	0.126133	0.115346	0.0962734	0.0587626	0.277733	0.128817	-0.507612	-0.591524	-0.492169	-0.181649	-0.147003	-0.161858	0.14388	0.193871	0.228915	0.525489	0.464566	0.525094	0.820395	positive	441
Cla97C01G016320	Cla97C01G016320.1	0.260136	0.0270213	0.183141	-0.213728	-0.100708	-0.0563609	0.0113008	0.00120698	-0.0045928	-0.0791287	0.0896058	-0.117892	0.137074	0.132666	0.144295	-0.0506127	-0.00124503	0.0197973	-0.137674	-0.122306	-0.0921468	-0.0505745	-0.0219062	0.0426333	0.499516	positive	444
Cla97C01G016350	Cla97C01G016350.1	-0.844314	-0.507844	-0.492915	-0.140755	-0.104645	-0.0489966	0.282569	0.228264	0.280088	0.447528	0.481398	0.419622	-2.9413	-2.92797	-2.67105	1.24859	1.189	1.26639	1.09885	1.12611	1.12423	0.483342	0.482797	0.521012	0.779376	positive	446
Cla97C01G016460	Cla97C01G016460.1	-0.188465	-0.15421	-0.198403	-0.0440749	-0.114464	0.0301497	0.0939716	0.0456703	0.083073	0.139394	0.217465	0.0898943	-0.591635	-0.880298	-0.855863	-0.0689938	-0.213606	-0.220401	0.22207	0.177046	0.131426	0.686246	0.845859	0.76815	0.927529	positive	448
Cla97C01G016490	Cla97C01G016490.1	-0.00667312	-0.00370766	-0.0642069	0.344639	0.315255	0.388186	0.12244	0.157303	0.118363	-0.449686	-0.441638	-0.480275	0.244144	0.226336	0.230035	0.24701	0.169159	0.262236	0.236018	0.246258	0.273815	-0.697013	-0.72676	-0.711238	0.887068	positive	449
Cla97C01G016510	Cla97C01G016510.1	0.443715	-0.0825246	0.18794	-0.325355	-0.090252	-0.0717754	0.0100067	0.0955975	-0.0964638	-0.199673	0.115889	0.0128949	-0.999113	-0.843934	-0.998881	0.262645	0.331868	0.180025	0.416428	0.396899	0.407644	0.271749	0.300456	0.274214	-0.560436	negative	450
Cla97C01G016540	Cla97C01G016540.1	-0.0713845	-0.00593146	0.0142868	0.0384627	0.0524968	0.00997812	0.0398722	0.0299762	-0.0176133	-0.00447786	-0.0577527	-0.027913	-0.512151	-0.46345	-0.413058	-0.0238047	0.0269258	-0.0254329	0.0992774	0.166217	0.0846726	0.340926	0.35634	0.363539	0.0663894	positive	451
Cla97C01G016570	Cla97C01G016570.1	0.258476	0.28702	0.338917	0.219087	0.171953	0.207447	0.110784	0.096831	0.0813255	-0.599584	-0.568122	-0.604135	1.13473	1.08052	1.15761	-0.0970837	-0.20039	-0.111053	-0.291423	-0.243278	-0.207853	-0.709742	-0.755511	-0.756528	0.747924	positive	452
Cla97C01G016640	Cla97C01G016640.1	0.0160955	-0.0639925	0.00741321	0.206394	0.124453	0.165355	-0.142334	0.0304507	-0.112061	-0.12951	-0.0624682	-0.0397957	0.12871	0.21443	0.179058	-0.0258684	0.048882	-0.0711394	-0.155206	-0.187561	-0.173907	-0.00360306	-0.0115567	0.0577607	0.0794084	positive	454
Cla97C01G016720	Cla97C01G016720.1	0.570008	0.500779	0.708429	-0.251795	-0.199264	-0.218304	0.0525497	0.0307233	0.0189461	-0.338144	-0.242906	-0.63102	-0.124953	-0.143826	-0.278012	0.008986	0.0475598	0.129276	0.0658262	0.133084	0.0272586	-0.0050721	0.0829401	0.0569321	-0.780301	negative	455
Cla97C01G016760	Cla97C01G016760.1	0.250959	0.323411	0.339805	0.00589231	-0.0192759	0.0262944	-0.409634	-0.234716	-0.29491	-0.0088593	0.0858246	-0.0647906	-0.0685375	-0.055865	-0.0203505	-0.128882	-0.183031	-0.130152	0.0757863	0.173763	0.137348	0.0762727	0.0909812	0.0326665	-0.506264	negative	457
Cla97C01G016790	Cla97C01G016790.1	0.524573	0.740651	0.705886	-0.0794146	0.0414541	-0.00326113	-0.00174808	-0.257542	-0.197421	-0.314631	-0.616505	-0.542042	1.17518	1.23989	1.07066	0.406517	0.221187	0.380806	-0.295281	-0.301521	-0.421822	-1.14276	-1.04891	-1.28394	0.935007	positive	459
Cla97C01G016810	Cla97C01G016810.1	0.463735	0.484353	0.359507	0.256022	0.245889	0.339395	0.0177652	-0.000212558	0.0399268	-0.773305	-0.702915	-0.73016	-0.0115589	0.0261053	0.00204393	-0.0582918	-0.110036	-0.137198	-0.0773889	-0.00680164	-0.098924	0.138236	0.103071	0.230744	-0.757472	negative	461
Cla97C01G016820	Cla97C01G016820.1	-0.223105	-0.246812	-0.0869767	0.0991585	0.164807	0.0388088	0.167371	0.0444007	0.159663	-0.0403614	0.0692992	-0.146253	-0.981306	-0.915678	-0.841768	0.0440587	0.0461905	0.0593307	0.305433	0.277877	0.319947	0.557282	0.572754	0.555879	0.615313	positive	462
Cla97C01G016870	Cla97C01G016870.1	0.472366	0.473428	0.392651	-0.156824	-0.19175	-0.0325264	-0.441046	-0.357473	-0.322033	0.0916219	0.0552024	0.0163832	0.934111	0.915553	0.996278	-0.272349	-0.181744	-0.110184	-0.296507	-0.245572	-0.198419	-0.514145	-0.505519	-0.521504	0.755377	positive	464
Cla97C01G016900	Cla97C01G016900.1	0.452606	0.588136	0.380317	-0.213798	-0.191589	-0.00127691	-0.208642	-0.33028	-0.174735	-0.114033	-0.0806833	-0.106022	0.127653	0.0919672	0.0594564	0.2232	0.17663	0.226447	-0.073856	-0.0425024	-0.0312772	-0.247675	-0.272314	-0.237729	0.272416	positive	465
Cla97C01G017120	Cla97C01G017120.1	0.195965	0.146968	0.199763	-0.132953	-0.11397	-0.128184	0.00223259	0.0180945	-0.0108763	-0.0449281	-0.0660558	-0.0660558	-0.217104	-0.129842	-0.244092	-0.0460855	-0.0462136	-0.00732783	0.114505	0.0421821	0.0298142	0.252091	0.0863224	0.16575	-0.640384	negative	469
Cla97C01G017130	Cla97C01G017130.1	0.731003	0.537833	0.668165	-0.259849	-0.112596	-0.0881011	0.0240093	0.281289	0.0225104	-0.49292	-0.750392	-0.560953	0.328585	0.274834	0.199128	-0.053936	-0.126048	-0.110761	-0.0729893	-0.151017	-0.148902	-0.0220897	-0.0451351	-0.0716693	0.667271	positive	470
Cla97C01G017170	Cla97C01G017170.1	0.0421819	0.110246	0.100908	-0.000253408	-0.0292533	-0.0484207	0.0588125	0.0239463	0.0182887	-0.0997891	-0.0784154	-0.0982518	0.271384	0.330046	0.44061	-0.0506484	0.0344871	-0.00204545	-0.22856	-0.102293	-0.253753	-0.141302	-0.124203	-0.173723	0.616012	positive	471
Cla97C01G017210	Cla97C01G017210.1	0.493872	0.608604	0.62932	-0.210473	-0.334889	-0.387427	-0.221029	-0.256785	-0.269513	-0.00952502	-0.0702627	0.0281061	3.42244	3.40584	3.37193	0.205806	0.215523	0.239138	-1.24627	-1.13704	-1.13898	-2.46172	-2.44806	-2.4286	0.720323	positive	472
Cla97C01G017230	Cla97C01G017230.1	-0.484625	-0.375803	-0.468277	0.0628625	-0.0181116	-0.0240732	0.346605	0.355816	0.346605	0.0698761	0.0416147	0.14751	-1.30502	-1.34066	-1.28766	0.455604	0.477041	0.438266	0.555128	0.549959	0.534036	0.321908	0.278941	0.322459	0.912677	positive	473
Cla97C01G017310	Cla97C01G017310.1	0.664918	0.733587	0.551262	-0.139825	0.0143345	-0.00217082	-0.0591166	-0.282818	-0.0764891	-0.464246	-0.552098	-0.387338	0.12828	0.119358	0.0856922	-0.16842	-0.186147	-0.219227	-0.0807264	-0.106515	-0.120926	0.125419	0.224988	0.198225	0.0342588	positive	475
Cla97C01G017370	Cla97C01G017370.1	0.0535843	0.0647789	0.112759	0.153963	0.119485	0.190194	0.0619884	0.0465434	0.0165901	-0.319459	-0.179147	-0.32128	0.507407	0.502366	0.501584	0.0960891	0.145487	0.192568	-0.297772	-0.330314	-0.32207	-0.326564	-0.311739	-0.357042	0.59903	positive	477
Cla97C01G017440	Cla97C01G017440.1	-0.205218	-0.218796	-0.170171	-0.0606672	0.0693143	-0.0837755	0.182103	0.171733	0.192399	-0.0110955	0.0181394	0.116034	-0.230551	-0.142338	-0.13573	0.205732	0.252958	0.206548	-0.0148797	0.00295734	-0.0191242	-0.150668	-0.0161653	0.0412606	0.34873	positive	478
Cla97C01G017480	Cla97C01G017480.1	-0.170868	-0.097278	-0.108237	0.205495	0.114155	0.147444	0.147444	0.13023	0.176117	-0.124039	-0.182403	-0.238061	-0.423689	-0.334798	-0.345871	0.5076	0.542044	0.508691	0.377221	0.391948	0.389306	-0.611049	-0.46609	-0.535313	0.965318	positive	479
Cla97C01G017520	Cla97C01G017520.1	0.304041	0.311236	0.353671	-0.455136	-0.430923	-0.334191	-0.252353	-0.215694	-0.343578	0.352509	0.402775	0.307643	-0.271173	-0.546199	-0.399318	-0.930655	-0.916551	-1.11987	0.0539777	0.253854	0.23602	1.24083	1.20718	1.19191	0.572747	positive	480
Cla97C01G017530	Cla97C01G017530.1	0.279444	0.285423	0.368879	-0.100866	-0.0249175	-0.0578435	0.00292614	-0.0293634	-0.0853533	-0.177743	-0.187647	-0.272937	0.483395	0.625989	0.467415	-0.159122	-0.144866	-0.0435239	-0.0625029	-0.104087	-0.0841623	-0.217573	-0.36566	-0.395302	0.967725	positive	481
Cla97C01G017730	Cla97C01G017730.1	0.172582	0.100765	0.141103	-0.16664	-0.378403	-0.194815	-0.220141	-0.230397	-0.209957	0.278848	0.390147	0.31691	-0.457876	-0.459029	-0.461406	-0.117428	-0.104869	-0.140334	0.268748	0.228388	0.291646	0.357696	0.283091	0.311373	0.0340234	positive	483
Cla97C01G017780	Cla97C01G017780.1	0.021287	-0.195836	-0.0181214	0.130771	0.410172	0.494527	0.134769	0.204905	-0.0122148	-0.0571155	-0.521115	-0.592029	0.450519	0.396149	0.339413	-0.223117	-0.0851417	-0.0260539	-0.206501	-0.140839	-0.0850961	-0.167827	-0.248466	-0.00303945	-0.0737109	negative	484
Cla97C01G017790	Cla97C01G017790.1	0.192653	0.701702	0.572476	0.0214143	0.0273149	-0.0466856	-0.124688	-0.300144	-0.242211	0.0765189	-0.659025	-0.219325	2.76503	2.71021	2.82934	0.44752	0.69833	0.470474	-1.61352	-1.66936	-1.56016	-1.70765	-1.85645	-1.51378	0.839922	positive	485
Cla97C01G017870	Cla97C01G017870.1	0.0985337	-0.00859053	0.0131919	-0.180895	-0.133855	-0.135452	0.0835126	0.0903598	0.110708	-0.0321934	0.0571929	0.0374875	-0.653233	-0.635928	-0.689855	-0.354161	-0.360013	-0.284655	0.4787	0.387407	0.39746	0.603358	0.517254	0.593666	0.393326	positive	486
Cla97C01G017980	Cla97C01G017980.1	0.131723	0.190785	0.141504	-0.413825	-0.746021	-0.69291	-0.242309	-0.290342	-0.199347	0.615547	0.768552	0.736643	0.155148	0.126189	0.132321	-0.385834	-0.36205	-0.379853	0.00823914	-0.0810494	-0.00549959	0.253351	0.285843	0.253194	0.930047	positive	488
Cla97C01G017990	Cla97C01G017990.1	0.209214	0.220403	0.259496	-0.0953466	-0.0618294	-0.0845973	-0.0394153	-0.0588207	-0.0693789	-0.046848	-0.0968887	-0.135989	0.327957	0.384099	0.357894	-0.212517	-0.18276	-0.173604	-0.119326	-0.0590452	-0.137813	-0.0572087	-0.0912739	-0.0364043	0.94697	positive	489
Cla97C01G018010	Cla97C01G018010.1	0.20615	0.184359	0.288965	-0.0553586	0.0319248	0.158293	-0.0477534	0.0575355	0.0476297	-0.0266698	-0.328186	-0.516889	0.0773157	0.179126	0.148648	-0.419939	-0.474395	-0.36654	-0.0232292	-0.00679179	0.0399942	0.265214	0.282784	0.297813	-0.302166	negative	490
Cla97C01G018090	Cla97C01G018090.1	-0.161647	-0.100859	0.143519	-0.0186584	0.00190992	-0.155126	0.224511	0.0619118	0.0896302	0.00773312	-0.0683335	-0.0245893	-0.141746	-0.165631	-0.0590531	0.050761	0.3125	0.0633089	0.295652	0.290837	0.221342	-0.357415	-0.186957	-0.323599	0.462406	positive	492
Cla97C01G018100	Cla97C01G018100.1	0.095789	0.131908	-0.0494567	-0.011022	-0.00374667	-0.236335	-0.1091	-0.0951154	0.00637755	0.0363308	-0.0227394	0.257109	1.20601	1.31406	1.22998	-0.0965475	-0.111584	-0.141323	-0.441953	-0.440297	-0.453233	-0.535589	-0.740649	-0.788877	0.133138	positive	493
Cla97C01G018170	Cla97C01G018170.1	0.104069	-0.0859019	0.0467359	-0.00573151	0.106743	-0.0452599	0.105407	0.121363	0.0824957	-0.138765	-0.18217	-0.108985	0.114701	0.165908	0.0918629	0.0904508	0.241033	0.124457	-0.00911767	-0.189235	-0.057049	-0.108234	-0.237779	-0.226998	0.390277	positive	494
Cla97C01G018200	Cla97C01G018200.1	0.182324	0.164225	0.205265	0.161621	0.0278922	0.0770878	-0.151537	-0.116347	-0.127451	-0.176031	-0.135435	-0.111614	0.830642	0.897852	0.911204	-0.26969	-0.290853	-0.196877	-0.36251	-0.373939	-0.315812	-0.264674	-0.262176	-0.303169	0.762718	positive	496
Cla97C01G018220	Cla97C01G018220.1	1.02193	1.06074	1.15454	-0.0581238	-0.154632	-0.0890032	-0.293588	-0.429693	-0.348574	-0.487947	-0.560624	-0.815028	1.62435	1.65342	1.50384	-0.438689	-0.518143	-0.518509	-0.295181	-0.415268	-0.518503	-0.725833	-0.6687	-0.68278	0.96448	positive	497
Cla97C01G018310	Cla97C01G018310.1	0.131227	0.15225	0.135192	-0.0671022	0.01122	0.0354676	0.141776	0.0704013	0.0269561	-0.207342	-0.234372	-0.195674	-0.496169	-0.471875	-0.514228	0.0196802	0.0527382	0.00102614	0.130611	0.0535741	0.122758	0.389885	0.350118	0.361881	-0.804191	negative	498
Cla97C01G018340	Cla97C01G018340.1	0.0787516	0.150835	0.146923	-0.0665752	-0.12213	-1.1554e-05	0.0229344	0.0286143	0.00287673	-0.0277425	-0.0605324	-0.153943	1.39429	1.40248	1.42504	0.564235	0.470466	0.560598	-0.652291	-0.47944	-0.588502	-1.46671	-1.32931	-1.30086	0.629594	positive	500
Cla97C01G018410	Cla97C01G018410.1	0.232696	0.268414	0.105873	0.691305	0.612101	0.52408	-0.39088	-0.149566	-0.315289	-0.609629	-0.802605	-0.166499	0.932904	1.00828	0.944841	-0.105265	-0.0152328	-0.0917176	-0.540333	-0.580671	-0.485388	-0.385544	-0.320196	-0.361682	0.45193	positive	501
Cla97C01G018420	Cla97C01G018420.1	0.431875	0.547438	0.592984	0.0718487	0.0502403	0.0312475	-0.201229	-0.229142	-0.199503	-0.243304	-0.405025	-0.44743	3.02047	3.04297	2.94491	-0.310781	-0.201688	-0.235826	-1.34508	-1.36679	-1.31308	-1.373	-1.47913	-1.38297	0.960983	positive	502
Cla97C01G018440	Cla97C01G018440.1	-0.353109	-0.56829	-0.267089	-0.0120717	-0.0120717	0.0144817	0.0203167	0.0689836	-0.107466	0.335533	0.428423	0.452359	0.17985	0.246167	0.317818	0.103036	0.0476031	-0.00636836	-0.100485	-0.135916	-0.0943314	-0.227567	-0.166425	-0.163381	-0.85097	negative	503
Cla97C01G018490	Cla97C01G018490.1	-0.225862	-0.779321	-0.327489	0.0218846	0.365971	0.145481	0.149468	0.265456	0.271566	0.141483	0.0116991	-0.0403357	0.71113	0.723158	0.614873	0.40132	0.453706	0.413771	-0.298397	-0.29322	-0.311625	-0.851568	-0.770494	-0.792654	-0.462964	negative	504
Cla97C01G018500	Cla97C01G018500.1	0.2144	0.0899181	0.0226708	-0.273851	-0.407582	-0.219136	-0.164753	-0.263098	-0.652182	0.311112	0.545277	0.797224	0.453466	0.41953	0.529385	-0.024297	-0.00744891	-0.022873	-0.217687	-0.258528	-0.231173	-0.201067	-0.236323	-0.202983	0.046555	positive	505
Cla97C01G018700	Cla97C01G018700.1	-0.964041	-0.355714	-0.38301	-0.177871	-0.205451	-0.124246	0.35553	0.245253	0.20392	0.572012	0.485183	0.348435	-5.80169	-5.90807	-5.82686	1.47574	1.31943	1.40861	1.88963	1.96535	1.92248	2.47774	2.54814	2.52951	0.818156	positive	506
Cla97C01G018720	Cla97C01G018720.1	-0.453573	-0.682015	-0.496459	0.057777	0.0364455	0.074618	0.205256	0.230523	0.205256	0.272486	0.319164	0.230523	-0.926419	-0.911825	-0.906546	0.335978	0.447826	0.378691	0.178886	0.206716	0.223333	0.350603	0.302752	0.320006	0.92931	positive	507
Cla97C01G018740	Cla97C01G018740.1	-0.540656	-0.43637	-0.553693	0.0507804	0.0862292	0.0276273	0.315011	0.277473	0.33872	0.149263	0.177148	0.108468	-0.826126	-0.789778	-0.923304	0.146037	0.153843	0.161785	0.155937	0.110883	0.177648	0.565666	0.535464	0.531947	0.887861	positive	508
Cla97C01G018850	Cla97C01G018850.1	0.147316	0.204001	0.0676336	0.144686	0.0978626	-0.0464557	0.0410071	0.122133	-0.0938115	-0.334961	-0.463498	0.114088	-0.555087	-0.568392	-0.683828	0.145689	0.15829	0.178298	0.249854	0.26628	0.157216	0.233511	0.203544	0.214625	-0.404695	negative	511
Cla97C01G018870	Cla97C01G018870.1	0.376384	0.786424	0.818747	-0.00577135	0.20455	0.219023	-0.286972	-0.475374	-0.606115	0.280533	-0.667717	-0.643711	-0.377191	-0.379817	-0.362764	0.0444683	0.0416452	0.0643192	0.0676498	0.202393	0.131443	0.192066	0.189749	0.186038	-0.806874	negative	512
Cla97C01G018930	Cla97C01G018930.1	0.048467	-0.0112981	-0.0362107	-0.0229681	0.0302314	0.0470724	-0.00839532	0.0760792	0.0217366	-0.00116375	-0.105861	-0.0376896	0.778724	0.558752	0.521005	-0.157695	-0.373875	-0.237809	-0.409562	-0.406703	-0.395092	0.0822271	0.133072	-0.0930445	-0.234905	negative	514
Cla97C01G019030	Cla97C01G019030.1	0.285434	-0.107107	0.367763	-0.265914	-0.0791834	-0.36545	0.0202498	-0.0160555	-0.0145856	0.0820088	0.126653	-0.0338119	0.719739	0.744508	0.734174	-0.465542	-0.620446	-0.491594	-0.31873	-0.458116	-0.375403	0.206035	0.153113	0.172263	0.665501	positive	516
Cla97C01G019080	Cla97C01G019080.1	-0.319285	-0.290394	-0.251591	0.284402	0.225608	0.260195	0.239295	0.273559	0.258974	-0.1671	-0.251591	-0.262071	-0.270738	-0.245196	-0.255747	0.0985712	0.0458867	0.123175	0.185834	0.159413	0.183237	-0.0601013	-0.0075513	0.0432163	0.836424	positive	518
Cla97C01G019350	Cla97C01G019350.1	-0.0154438	-0.212517	0.0536117	-0.0725579	0.1006	-0.0972993	0.208001	0.195323	0.116826	-0.091074	-0.0422162	-0.143254	-0.369144	-0.348085	-0.333686	0.030241	0.0638188	0.0315477	0.175987	0.155398	0.219817	0.113079	0.10235	0.158678	0.365403	positive	521
Cla97C01G019370	Cla97C01G019370.1	0.53191	0.690521	0.58175	-0.0644822	-0.136672	-0.0319911	-0.141616	-0.0993239	-0.120315	-0.251327	-0.551161	-0.407294	0.5666	0.491039	0.480088	-0.209584	-0.2819	-0.185658	-0.158011	-0.206214	-0.246781	-0.12811	-0.0901494	-0.0313189	0.835751	positive	522
Cla97C01G019430	Cla97C01G019430.1	-0.140744	0.165882	-0.0712036	0.327931	0.0599739	0.175018	0.36147	0.00688017	0.237393	-0.675584	-0.147236	-0.299781	2.07734	2.04005	2.0523	0.179715	0.2192	0.209627	-0.270749	-0.248791	-0.236717	-1.94118	-2.00074	-2.08006	0.426624	positive	523
Cla97C01G019460	Cla97C01G019460.1	0.0951313	0.00537205	0.0111486	-0.102768	-0.139094	-0.160038	0.0855815	0.0937709	0.127402	-0.0872551	0.0495469	0.0212023	-0.115534	-0.150005	-0.128698	0.107318	0.0920149	0.120777	-0.0307143	0.0103174	-0.0448989	0.0449819	0.0636001	0.0308407	-0.625174	negative	524
Cla97C01G019510	Cla97C01G019510.1	0.221163	0.0788008	0.0313579	0.0127974	-0.0715255	0.00848015	0.0732996	0.0992456	0.153693	-0.334865	-0.0868409	-0.185607	-0.737408	-0.640807	-0.521561	0.0449608	0.156823	0.0565895	0.225954	0.10762	0.137064	0.399675	0.369713	0.401376	-0.639557	negative	525
Cla97C01G019580	Cla97C01G019580.1	0.66466	0.498511	0.659925	-0.0100127	-0.21044	-0.103525	-0.292494	-0.427064	-0.272444	-0.39518	0.180556	-0.292494	0.503796	0.502785	0.432532	-0.172345	-0.232576	-0.222299	-0.315102	-0.403373	-0.320503	0.145809	-0.0268678	0.108144	0.810141	positive	527
Cla97C01G019650	Cla97C01G019650.1	0.487998	0.269646	0.272099	-0.479651	-0.35326	-0.19409	-0.317774	-0.306747	-0.240549	0.241126	0.38635	0.234851	0.0360467	-0.027005	0.0470109	-0.126059	-0.211758	-0.182764	-0.00935001	0.00238975	-0.00744551	0.173031	0.160282	0.145621	0.705062	positive	530
Cla97C01G019770	Cla97C01G019770.1	0.603267	0.952929	0.923165	-0.287356	-0.352769	-0.335163	-0.0312347	-0.380591	-0.242905	-0.0646946	-0.348838	-0.43581	1.42805	1.46134	1.38533	-0.326474	-0.326662	-0.342316	-0.722356	-0.469864	-0.504051	-0.510596	-0.519893	-0.552511	0.937005	positive	532
Cla97C01G019840	Cla97C01G019840.1	0.0341217	0.0795647	0.114097	-0.0474921	-0.191882	-0.304129	-0.105114	-0.213986	-0.246914	0.111365	0.38575	0.384619	-0.518497	-0.565723	-0.600931	-0.035749	-0.0334092	-0.032902	0.203812	0.157192	0.172221	0.42525	0.389763	0.438973	0.163165	positive	533
Cla97C01G019850	Cla97C01G019850.1	-1.00771	-1.04972	-0.927196	0.0937347	0.112902	0.107032	0.256385	0.300779	0.281362	0.60042	0.616005	0.616005	-2.62591	-2.65325	-2.5006	1.40154	1.43629	1.44043	1.15041	1.14065	1.16626	0.0164868	0.00725215	0.0204336	0.799496	positive	534
Cla97C01G019860	Cla97C01G019860.1	-0.0997001	-0.15005	-0.0812628	-0.00978345	0.0513749	0.0246706	0.0499817	0.0401912	0.0471912	0.058321	0.0443953	0.0246706	-0.00410378	0.0783328	0.0478035	-0.25041	-0.2485	-0.249936	0.188661	0.127462	0.175907	0.0522584	0.0759872	0.00653765	-0.0181708	negative	535
Cla97C01G020000	Cla97C01G020000.1	0.746192	0.339669	0.364053	-0.267121	0.0994061	0.010992	-0.25116	-0.0831963	-0.0429468	-0.395736	-0.274272	-0.245879	1.4172	1.43457	1.13448	-0.550322	-0.180775	-0.255607	-0.425835	-0.389836	-0.486356	-0.653644	-0.543194	-0.500685	0.91876	positive	538
Cla97C01G020080	Cla97C01G020080.1	-0.34279	-0.339119	-0.25198	0.113464	0.142637	0.0986527	0.177652	0.240333	0.205568	0.0307649	-0.0212297	-0.053952	-0.0035085	0.0333882	0.0251957	0.055242	0.0778377	0.0645033	-0.170835	-0.154093	-0.145168	0.100232	0.0562397	0.0609654	-0.40729	negative	540
Cla97C01G020100	Cla97C01G020100.1	-0.0921853	-0.0497946	-0.0246522	0.0565877	0.042662	0.0342415	-0.0408707	-0.0906497	-0.145393	0.0935293	0.120296	0.0962284	-0.0963433	-0.0960014	-0.0793761	0.135736	0.155054	0.0957235	0.0541444	-0.014438	0.0632599	-0.0382196	-0.0728314	-0.106708	0.00534676	positive	541
Cla97C01G020120	Cla97C01G020120.1	-0.0211444	-0.0887479	0.130565	-0.0285014	-0.00219011	0.0518284	-0.129302	-0.0182121	-0.154837	0.228867	0.0601758	-0.0285014	0.34627	0.341494	0.4191	0.0734009	0.120199	0.12426	-0.165195	-0.189139	-0.111847	-0.317248	-0.33709	-0.304202	-0.0645243	negative	542
Cla97C01G020130	Cla97C01G020130.1	0.241502	-0.249584	0.196609	-0.109885	0.0174719	0.0416478	-0.125635	0.150274	-0.0819613	-0.122472	0.0860846	-0.0440533	-0.246611	-0.212604	-0.300771	-0.0788046	-0.132819	-0.115738	0.168584	0.100737	0.149522	0.227518	0.159035	0.281952	-0.329311	negative	543
Cla97C01G020350	Cla97C01G020350.1	-0.0360863	-0.0495207	-0.131277	-0.136047	-0.0510211	-0.0510211	0.0643406	-0.176416	-0.0480218	0.120071	0.264588	0.230411	0.146013	0.0704833	0.0869742	-0.284661	-0.0695324	-0.0704935	-0.11549	0.102823	-0.241117	0.261035	0.0831408	0.0308241	0.289415	positive	546
Cla97C01G020360	Cla97C01G020360.1	-0.069341	-0.100103	-0.14912	0.156959	0.0698217	0.113378	0.0890396	0.0767147	0.0712029	-0.0908055	-0.0861791	-0.0815673	0.534705	0.577212	0.543681	0.0500382	0.0763717	0.026578	-0.250278	-0.240713	-0.21912	-0.404269	-0.371362	-0.322842	-0.284732	negative	547
Cla97C01G020450	Cla97C01G020450.1	0.0211168	0.258373	0.268064	-0.240486	-0.0343783	-0.132957	-0.0629474	0.0254084	-0.081287	0.27649	-0.252558	-0.0448381	-0.303068	-0.173592	-0.233043	-0.117373	-0.0605292	-0.123295	0.105559	0.122224	0.186884	0.196317	0.19693	0.202985	-0.238462	negative	548
Cla97C01G020470	Cla97C01G020470.1	-0.0996572	0.00814605	-0.0357973	-0.078055	0.0167764	-0.00489699	-0.164848	-0.206094	-0.121588	0.319649	0.188294	0.178071	0.0490736	0.0635219	0.0140885	-0.262583	-0.147487	-0.212692	-0.038974	-0.17942	-0.140765	0.241738	0.278561	0.334938	0.760365	positive	549
Cla97C01G020500	Cla97C01G020500.1	-0.532511	-0.417527	-0.359502	0.188983	0.152225	0.186388	-0.128738	-0.0889043	-0.133593	0.430689	0.356458	0.346033	1.34407	1.31902	1.36207	-0.100472	-0.0720571	-0.0221679	-0.57094	-0.506957	-0.491284	-0.785484	-0.717625	-0.758173	-0.812577	negative	551
Cla97C01G020530	Cla97C01G020530.1	-0.0296106	0.124293	-0.0266872	-0.134277	-0.0369451	-0.158071	0.250153	0.0624925	0.146479	-0.1677	-0.00927015	-0.0208581	0.800646	0.703207	0.570151	-0.243522	-0.222827	-0.27404	-0.0133813	-0.249511	-0.165574	-0.31478	-0.231299	-0.359073	0.253669	positive	553
Cla97C01G020550	Cla97C01G020550.1	0.102991	0.0976227	0.12822	0.0259555	-0.0127096	0.0287788	0.00889882	0.040017	-0.0112589	-0.0963675	-0.167295	-0.144853	-0.571896	-0.401195	-0.501943	-0.128779	-0.22046	-0.0709042	0.270442	0.337645	0.124122	0.417128	0.381526	0.364314	-0.809708	negative	555
Cla97C01G020580	Cla97C01G020580.1	-0.338116	-0.0283684	-0.188135	-0.0537976	-0.0982388	0.00678533	0.362748	0.110078	0.251129	-0.0150852	0.0523629	-0.0613628	-0.838452	-0.651503	-0.809943	0.0017012	-0.127115	-0.0936035	0.342767	0.458736	0.414781	0.449503	0.428956	0.424172	0.706205	positive	557
Cla97C01G020680	Cla97C01G020680.1	0.960206	0.768234	0.66125	-0.0555781	-0.0811983	-0.123826	-0.54164	-0.154094	-0.167753	-0.6477	-0.261663	-0.356238	1.9649	1.98099	1.83442	-0.270167	-0.443962	-0.29415	-0.593884	-0.859017	-0.816401	-0.823633	-0.920159	-0.758944	0.944861	positive	559
Cla97C01G020700	Cla97C01G020700.1	-0.272581	-0.274358	-0.530649	-0.0552734	-0.100289	-0.247918	0.136225	0.0899896	0.199075	0.249436	0.325353	0.48099	-0.663671	-0.56209	-0.773359	0.0121564	-0.00633463	-0.0368475	0.2384	0.14535	0.216103	0.484612	0.503031	0.44265	0.924522	positive	560
Cla97C01G020730	Cla97C01G020730.1	-0.158715	-0.0344014	-0.0736403	0.0814194	0.128725	0.178388	0.0424253	0.0550744	0.0494662	-0.0967732	-0.0736403	-0.0983287	-0.110416	0.0690159	0.0432646	0.133926	0.045835	-0.0270713	0.0208504	-0.0537597	-0.0273952	-0.0369414	-0.0702567	0.0129491	0.362953	positive	561
Cla97C01G020790	Cla97C01G020790.1	-0.968332	-0.817529	-0.738674	0.00288865	0.059884	0.131603	0.444829	0.503318	0.426696	0.322673	0.2917	0.340943	-4.31243	-4.30513	-4.40999	0.710056	0.75092	0.71091	1.71362	1.67452	1.72221	1.91912	1.90204	1.92416	0.98067	positive	562
Cla97C01G021010	Cla97C01G021010.1	-0.154758	-0.156391	0.00131946	0.0374791	0.0573395	-0.0074954	0.0685668	0.0288831	0.0158923	0.0783195	-0.0433035	0.0741478	0.542021	0.530939	0.627317	-0.0525599	-0.0616819	-0.00114151	-0.244617	-0.378464	-0.304424	-0.242241	-0.216554	-0.198595	-0.713088	negative	566
Cla97C01G021060	Cla97C01G021060.1	-0.254029	-0.201127	-0.266248	0.00755589	0.0419415	0.0602304	0.115092	0.171831	0.140439	0.112398	0.00610522	0.0658115	-0.191235	-0.122311	-0.0970432	0.217936	0.287377	0.268407	-0.019719	-0.00365736	0.0302354	-0.0915607	-0.146713	-0.131715	0.387151	positive	567
Cla97C01G021120	Cla97C01G021120.1	0.0323628	0.20749	-0.0783843	-0.12043	-0.14433	-0.00653402	-0.0375292	0.0535274	0.0688531	0.0152046	-0.126765	0.136534	-0.261351	-0.237414	-0.292012	0.0712662	-0.00332037	0.0735738	-0.0205011	-0.0580051	0.0218678	0.253428	0.241909	0.210559	-0.187772	negative	569
Cla97C01G021210	Cla97C01G021210.1	-0.366195	-0.349343	-0.37944	-0.0724146	-0.0137053	-0.069345	0.0956313	0.0846498	0.0887777	0.313524	0.375659	0.292203	-0.241492	-0.262978	-0.301359	-0.0166481	-0.0375861	0.00456971	0.207764	0.220184	0.21686	0.0606539	0.0772106	0.0728213	0.794366	positive	571
Cla97C01G021230	Cla97C01G021230.1	0.00515351	-0.0107401	0.00371585	-0.0151053	0.00371585	-0.0224101	0.0350182	0.0532007	0.0265483	-0.031225	-0.0371316	-0.0107401	0.75563	0.745409	0.7401	-0.0719605	-0.0286601	-0.0802485	-0.254894	-0.317655	-0.257769	-0.408549	-0.437671	-0.383732	0.0133776	positive	572
Cla97C01G021250	Cla97C01G021250.1	-0.0900282	-0.108564	-0.133655	0.0064346	0.0121653	0.029222	0.0207188	-0.0108953	0.0488699	0.0078694	0.106257	0.111606	-0.821333	-0.869149	-0.858614	-0.0908764	0.0769708	-0.00763567	0.277581	0.238304	0.258832	0.61909	0.575973	0.600857	0.907636	positive	573
Cla97C01G021340	Cla97C01G021340.1	-0.628709	-0.785892	-0.659281	0.183955	0.14229	0.197142	0.374777	0.451618	0.367796	0.129965	0.163945	0.0623928	-0.767713	-0.666899	-0.800736	0.133361	0.185181	0.0781815	0.404238	0.108767	0.250469	0.346064	0.344906	0.384181	0.914471	positive	576
Cla97C01G021400	Cla97C01G021400.1	0.465915	0.498621	0.063626	-0.142174	-0.243221	-0.138925	-0.384218	-0.327634	0.00755008	0.0148623	0.043746	0.141851	0.862233	0.748835	0.846488	-1.14497	-1.16073	-1.29473	-0.556188	-0.584401	-0.636185	0.946788	0.944834	1.02802	0.697926	positive	577
Cla97C01G021430	Cla97C01G021430.1	-0.269594	-0.24876	-0.343134	0.218329	0.212081	0.227031	-0.075201	-0.115494	-0.145667	0.110934	0.177865	0.251609	-0.141411	-0.0875363	-0.164485	0.173509	0.174029	0.207309	0.120824	0.0241428	0.0579034	-0.144867	-0.114531	-0.104886	0.446475	positive	578
Cla97C01G021520	Cla97C01G021520.1	-0.269427	-0.248543	-0.141998	0.126642	0.125309	0.10922	0.0833715	0.171238	0.13726	-0.0101956	-0.0204848	-0.0623918	-0.162849	-0.212176	-0.0897653	0.340503	0.351107	0.427303	0.00723705	0.346041	0.320253	-0.293052	-0.601528	-0.433073	0.657782	positive	579
Cla97C01G021530	Cla97C01G021530.1	-0.205759	-0.316925	-0.200753	0.0620037	0.0675472	0.0240174	0.148241	0.166437	0.111145	0.0438388	0.0382033	0.0620037	-0.28284	-0.304259	-0.321984	-0.165657	-0.000570145	-0.120954	0.286306	0.24313	0.231378	0.165597	0.121903	0.14795	0.864606	positive	580
Cla97C01G021540	Cla97C01G021540.1	-0.0520744	-0.254464	-0.165162	-0.155392	-0.250992	-0.225213	0.0902278	0.0956926	0.142646	0.18812	0.369369	0.217241	-0.381626	-0.65428	-0.567539	-0.436919	-0.677106	-0.628435	0.305143	0.217927	0.203069	0.918328	0.843119	0.85832	0.957866	positive	581
Cla97C01G021610	Cla97C01G021610.1	0.61623	0.487008	0.503808	-0.207635	-0.145736	-0.0974268	-0.190642	-0.214489	-0.144099	-0.270523	-0.094263	-0.242234	0.613917	0.5467	0.437774	-0.497582	-0.559273	-0.554654	0.334518	0.268405	0.305388	-0.256263	-0.389624	-0.249305	0.669525	positive	582
Cla97C01G021630	Cla97C01G021630.1	-0.0709014	-0.126815	-0.0437369	-0.214971	0.15562	-0.0602766	0.00332764	-0.166959	-0.0800711	0.269494	0.138593	0.196696	-0.387365	-0.53226	-0.426526	-0.151999	-0.076542	-0.129319	0.0812525	0.0872013	0.137664	0.51063	0.438047	0.449215	0.679027	positive	583
Cla97C01G021640	Cla97C01G021640.1	-0.0429015	-0.222379	0.00988595	0.140567	-0.0177332	0.0313231	-0.195568	0.00844542	-0.235973	0.182049	0.174361	0.167924	-0.966042	-0.95934	-0.94059	0.746053	0.709618	0.753759	0.319288	0.251577	0.255695	-0.0657457	-0.0930522	-0.011221	0.193072	positive	584
Cla97C01G021740	Cla97C01G021740.1	-0.100367	-0.179505	-0.0418507	-0.120944	-0.117759	-0.159719	0.16057	0.119329	0.135433	0.122025	0.0907055	0.0920815	0.198733	0.044149	-0.00567944	-0.499328	-0.638721	-0.345882	0.00813945	0.078579	-0.0753049	0.429299	0.368322	0.437693	0.576966	positive	586
Cla97C01G021790	Cla97C01G021790.1	0.384591	0.686055	0.257211	-0.00878551	-0.0864586	-0.00139085	-0.12451	-0.335169	-0.119698	-0.335169	-0.309373	-0.00730354	1.9303	1.93603	1.88173	-0.34831	-0.42698	-0.332926	-0.863613	-0.807893	-0.795345	-0.795542	-0.650074	-0.727386	0.894231	positive	587
Cla97C01G021800	Cla97C01G021800.1	0.460563	0.465896	0.225469	-0.00154305	0.0347988	0.0448126	-0.0942599	-0.138899	-0.0479167	-0.383592	-0.426428	-0.138899	0.133132	0.144938	0.191265	0.0255939	-0.0485962	0.0269562	-0.0126002	0.00879008	0.0229155	-0.238794	-0.101471	-0.152129	0.851729	positive	588
Cla97C01G022150	Cla97C01G022150.1	0.453793	0.406713	0.568836	-0.648004	-0.720092	-0.595623	-0.483207	-0.372897	-0.319785	0.647991	0.613008	0.449267	-0.216305	-0.152219	-0.274363	-0.260056	-0.358664	-0.297496	0.121813	0.0559459	0.0879113	0.42182	0.451403	0.42021	0.490529	positive	590
Cla97C01G022190	Cla97C01G022190.1	0.62196	0.551002	0.599978	-0.350792	-0.239761	-0.287066	-0.12707	-0.073863	-0.285286	-0.306793	0.0651761	-0.167485	0.333529	0.281888	0.255323	0.0934013	0.00749999	0.035054	-0.0942644	-0.18421	-0.153644	-0.177594	-0.216517	-0.180466	0.739225	positive	591
Cla97C01G022200	Cla97C01G022200.1	0.444235	0.254814	0.291156	-0.267139	-0.22547	-0.234052	-0.304614	-0.132681	-0.198344	0.0816649	0.134626	0.155804	1.95355	2.07178	2.02957	-0.552003	-0.789531	-0.631791	-0.874547	-0.826415	-0.867702	-0.413403	-0.604697	-0.494811	0.814464	positive	592
Cla97C01G022220	Cla97C01G022220.1	-0.156569	-0.143498	-0.150018	0.28288	0.286507	0.264611	0.16306	0.136514	0.141863	-0.283443	-0.27273	-0.269177	1.46576	1.4961	1.46564	0.160497	0.092333	0.154646	-0.526123	-0.47045	-0.552299	-1.11306	-1.08325	-1.08979	0.0488367	positive	593
Cla97C01G022240	Cla97C01G022240.1	0.107446	0.12753	0.211469	0.337522	0.290791	0.198869	0.0966187	0.0055003	-0.0163702	-0.418731	-0.49447	-0.446174	1.22275	1.19367	1.20964	-0.0608376	-0.0480402	-0.0809823	-0.124138	-0.279284	-0.202259	-0.839212	-1.03586	-0.955441	0.679156	positive	594
Cla97C01G022280	Cla97C01G022280.1	-0.0316192	-0.0242472	-0.127886	0.268865	0.163057	0.0376434	0.102386	0.0446707	0.0956352	-0.364304	-0.207469	0.043268	-0.281634	-0.235453	-0.233592	0.430042	0.338539	0.480426	0.0489005	0.0588314	-0.0170813	-0.241664	-0.142887	-0.204428	0.671756	positive	595
Cla97C01G022370	Cla97C01G022370.1	-0.173937	-0.141516	-0.0988715	-0.0469044	-0.0469044	0.0162465	0.122854	0.159747	0.0642937	0.0656829	0.0573275	0.0219829	0.205083	0.252031	0.1224	-0.148357	-0.0274508	-0.124232	-0.0858292	-0.126694	-0.0616303	0.0376944	-0.0315408	-0.0114752	-0.749287	negative	596
Cla97C01G022430	Cla97C01G022430.1	-0.0239329	0.0280617	0.156899	0.120107	0.0932402	0.0421782	-0.00348955	-0.015136	-0.0446702	-0.200491	-0.124414	-0.0283516	-0.772079	-0.733011	-0.720943	0.0835542	0.164201	0.13034	0.296521	0.269692	0.286276	0.29829	0.337231	0.359928	-0.428676	negative	597
Cla97C01G022490	Cla97C01G022490.1	-0.508116	-0.396625	-0.155469	-0.0781493	-0.145776	-0.0477437	0.250217	0.237929	0.115648	0.216794	0.269664	0.241626	-1.68182	-1.60493	-1.53162	0.0762669	0.0404935	-0.0274719	0.759563	0.62623	0.597943	0.885672	0.894269	0.965413	0.928588	positive	599
Cla97C01G022690	Cla97C01G022690.1	-1.07817	-0.907881	-0.925511	0.163342	0.090658	0.103754	0.469057	0.470181	0.545698	0.299835	0.392865	0.376173	-2.19258	-2.12454	-2.05937	0.835032	0.788574	0.84803	0.681904	0.652437	0.68307	0.636752	0.62209	0.628599	0.95687	positive	601
Cla97C01G022700	Cla97C01G022700.1	0.106667	0.231754	0.151304	-0.0229908	-0.105539	-0.0871211	0.0509368	0.0130244	0.000162269	-0.0840743	-0.204633	-0.04949	0.259777	0.283741	0.282204	-0.103862	-0.0137238	-0.088058	-0.0317941	-0.137451	-0.0919815	-0.128714	-0.103885	-0.126253	0.805884	positive	602
Cla97C01G022720	Cla97C01G022720.1	0.387117	0.406226	0.395016	0.0089446	-0.0298078	0.0366196	-0.258508	-0.325538	-0.368832	-0.102616	-0.0805418	-0.0680778	0.147668	0.135857	0.0875376	0.0831677	-0.00352072	0.0489608	-0.0128341	-0.0548849	-0.070938	-0.118427	-0.136833	-0.105754	0.766557	positive	604
Cla97C01G022780	Cla97C01G022780.1	-0.3333	0.11647	0.111112	0.0922	-0.102583	0.0225583	-0.0416369	-0.037168	-0.140427	0.249225	0.040991	0.0225583	-0.44382	-0.453313	-0.511396	-0.110056	-0.15175	-0.229823	0.25918	0.309902	0.202834	0.379256	0.364106	0.384879	0.182524	positive	607
Cla97C01G022820	Cla97C01G022820.1	-0.112635	-0.325379	-0.257851	0.0335483	0.0406238	0.0973702	0.117586	0.176587	0.110879	-0.00964943	0.126924	0.00199701	-0.174623	-0.190951	-0.20772	-0.0639999	-0.00200813	-0.0356886	0.11765	0.073377	0.0383474	0.168485	0.15253	0.124601	0.761424	positive	609
Cla97C01G022990	Cla97C01G022990.1	0.385041	0.103471	0.405361	0.289884	0.432017	0.266624	-0.266224	0.0151441	-0.201628	-0.402835	-0.55157	-0.475286	2.63316	2.68611	2.71447	0.404588	0.419899	0.178385	-1.09934	-1.36342	-1.28261	-1.80902	-1.59026	-1.89197	0.794147	positive	612
Cla97C01G023000	Cla97C01G023000.1	0.0238048	-0.0933349	-0.0718704	-0.0298763	0.0252283	0.0407945	0.0238048	0.175096	0.0700535	0.000836028	-0.142031	-0.0225043	-0.916875	-0.97632	-0.887311	0.114382	0.0669204	0.0253837	0.34304	0.337164	0.406614	0.525978	0.441031	0.519992	0.292244	positive	613
Cla97C01G023030	Cla97C01G023030.1	0.572956	0.641239	0.596415	0.281048	0.215372	0.253083	0.062637	0.175295	0.163051	-0.739236	-0.932976	-1.28889	-0.802877	-0.695245	-0.809506	-0.0579424	-0.117019	-0.126654	0.409443	0.35509	0.40093	0.451296	0.481788	0.510696	-0.759057	negative	614
Cla97C01G023130	Cla97C01G023130.1	0.35941	0.493482	0.327066	-0.228984	-0.34704	-0.116681	-0.195036	-0.110339	-0.127846	0.073579	-0.0852483	-0.0423625	-0.465732	-0.470967	-0.576227	-0.163491	-0.115468	-0.117307	0.527348	0.456617	0.372463	0.209141	0.188407	0.155215	-0.654578	negative	615
Cla97C01G023180	Cla97C01G023180.1	0.226085	0.178159	0.178159	0.00967604	0.0010025	0.0508784	-0.331841	-0.138968	-0.169648	0.0339716	0.0282917	-0.0657665	0.0196578	0.0170343	-0.0139592	-0.174621	-0.260076	-0.208244	-0.0521426	-0.0616706	-0.0508942	0.248035	0.294802	0.242078	0.0874675	positive	616
Cla97C01G023220	Cla97C01G023220.1	-0.432876	-0.231157	-0.157755	-0.0663749	-0.0694315	-0.103488	0.0897443	0.119576	0.048045	0.358931	0.204273	0.240514	-0.264737	-0.17186	-0.217411	0.138072	0.136112	0.250129	-0.029312	-0.0455538	-0.0734736	0.0706356	0.049273	0.158125	0.523086	positive	617
Cla97C01G023250	Cla97C01G023250.1	0.0782451	0.114878	0.319473	0.365805	0.515585	0.66178	0.00956716	-0.0927505	-0.246897	-0.275788	-0.462453	-0.987443	-0.399893	-0.351171	-0.546877	-0.00381942	-0.111211	-0.0625649	0.13216	0.0877234	0.0652331	0.364013	0.438917	0.387489	-0.663482	negative	619
Cla97C01G023260	Cla97C01G023260.1	-0.157967	0.0759316	-0.0746969	0.0759316	0.0509612	0.0977703	0.147041	0.165254	0.132568	-0.0564923	-0.309611	-0.14669	-0.95896	-0.932832	-0.936863	0.331212	0.365038	0.390146	0.304237	0.382056	0.362073	0.253245	0.114133	0.326515	0.311384	positive	620
Cla97C01G023380	Cla97C01G023380.1	0.206921	0.195496	0.276045	-0.0619416	-0.149881	-0.111534	-0.206011	-0.217843	-0.216147	0.152813	0.147553	-0.0154715	0.311247	0.233952	0.214334	-0.0974275	-0.0572615	-0.0456001	-0.063142	-0.098853	-0.0945746	-0.124673	-0.104528	-0.0734735	0.663165	positive	622
Cla97C01G023420	Cla97C01G023420.1	-0.192572	-0.532819	-0.165731	0.0923088	0.169433	0.149534	0.291887	0.24139	0.153536	-0.0849316	-0.115105	-0.00692912	-0.799525	-0.644992	-0.679391	0.568221	0.588132	0.514083	0.272934	0.240406	0.275191	-0.186669	0.0220121	-0.170403	0.811775	positive	623
Cla97C01G023430	Cla97C01G023430.1	0.390117	0.43158	0.339207	0.0876679	0.0464249	0.0536204	0.101621	0.11956	-0.0245416	-0.389929	-0.643235	-0.512092	-0.232539	-0.37606	-0.463239	-0.0550227	-0.148538	-0.111976	0.377858	0.382433	0.451484	0.0189193	0.03604	0.120641	-0.397981	negative	624
Cla97C01G023470	Cla97C01G023470.1	-0.472299	-0.495383	-0.348678	-0.0872366	-0.367914	-0.299832	0.249599	0.217694	0.195588	0.38561	0.523531	0.499319	-0.976614	-0.956234	-1.16179	-0.122681	-0.355599	-0.461125	0.469617	0.377717	0.577315	0.811302	0.832729	0.965363	0.964046	positive	625
Cla97C01G023480	Cla97C01G023480.1	-0.00437224	0.0469037	-0.0590431	0.209503	0.185552	0.18936	-2.89492e-05	-0.0204104	0.0285969	-0.285205	-0.201374	-0.0894808	1.4901	1.42773	1.48409	0.67734	0.766168	0.751959	-0.62628	-0.766242	-0.582353	-1.47059	-1.50569	-1.64622	0.62258	positive	626
Cla97C01G023530	Cla97C01G023530.1	-0.454956	-0.284803	-0.184416	0.447413	0.45617	0.444115	0.318885	0.262589	0.312871	-0.295788	-0.440661	-0.58142	-1.89084	-1.91606	-1.79241	1.15202	1.15772	1.16375	0.687231	0.747731	0.717393	-0.0713661	-0.0152993	0.0601314	0.728233	positive	627
Cla97C01G023590	Cla97C01G023590.1	0.48753	0.418478	0.453965	0.16774	0.107733	0.124348	-0.0495403	-0.0604522	-0.12444	-0.523213	-0.470283	-0.531865	0.89712	0.886309	0.896494	-0.141455	0.0600267	-0.0204939	-0.382879	-0.416024	-0.185811	-0.464072	-0.557094	-0.572119	0.896383	positive	628
Cla97C01G023640	Cla97C01G023640.1	-0.30391	-0.117769	-0.152803	-0.0160319	-0.116196	-0.0278091	0.067977	0.107543	0.0343919	0.231278	0.135531	0.157798	-0.208339	-0.2541	-0.228544	0.133102	0.156535	0.0719464	0.0726374	0.0850731	0.0755424	0.00910439	0.00224969	0.0847929	0.563755	positive	629
Cla97C01G023720	Cla97C01G023720.1	-0.105845	-0.512543	-0.302079	0.0612898	0.162407	0.0696452	0.20095	0.23849	0.138778	-0.0671642	0.094425	0.0216451	-0.629106	-0.64364	-0.530573	0.37413	0.338819	0.389998	0.158222	0.26761	0.187056	0.0146908	0.0521239	0.0206689	0.846293	positive	631
Cla97C01G023800	Cla97C01G023800.1	0.275536	0.245492	0.222232	-0.00448663	-0.0984628	-0.0604349	-0.367057	-0.307049	-0.19404	0.0986069	0.129205	0.0604597	0.623493	0.690713	0.606852	0.0112618	0.0533659	0.0133465	-0.488561	-0.478748	-0.444699	-0.176198	-0.245858	-0.164969	0.822767	positive	633
Cla97C01G023840	Cla97C01G023840.1	0.533416	0.367229	0.559005	-0.0244363	0.0438521	-0.0520632	-0.144863	-0.112184	-0.130066	-0.274456	-0.320376	-0.445059	-0.288138	-0.268842	-0.284237	0.110572	0.168461	0.114907	0.0194307	0.0835566	0.0202007	0.117463	0.142421	0.0642059	-0.853964	negative	634
Cla97C01G023960	Cla97C01G023960.1	0.0890618	0.0711741	0.0917942	-0.0944307	-0.0591477	-0.0129179	0.0614496	0.0132608	0.0890618	-0.129007	-0.0336126	-0.0866867	0.399296	0.39416	0.39097	-0.059963	0.0193785	-0.0891984	-0.290735	-0.271448	-0.297734	-0.0398593	-0.126315	-0.0285516	0.299916	positive	636
Cla97C01G023990	Cla97C01G023990.1	-0.0344579	0.0295431	0.0702246	0.137779	0.166529	0.188359	0.0812481	0.00948547	0.105747	-0.208106	-0.226678	-0.319674	0.0852301	0.242558	0.113521	0.40236	0.397911	0.511697	-0.105976	-0.00828162	-0.00810532	-0.534095	-0.529433	-0.567385	0.919708	positive	637
Cla97C01G024130	Cla97C01G024130.1	-0.221716	0.0888459	-0.128713	0.215875	0.10535	0.136464	0.34888	0.190317	0.45034	-0.34522	-0.324809	-0.515613	-0.587522	-0.631056	-0.64708	-0.0289613	-0.053191	-0.0332943	0.364127	0.361959	0.33074	0.270873	0.343252	0.310154	0.0894813	positive	639
Cla97C01G024200	Cla97C01G024200.1	0.197239	0.239748	0.296521	-0.152878	-0.113	-0.0711346	0.33278	0.109617	0.176793	-0.309921	-0.237816	-0.467948	0.634546	0.679779	0.609858	-0.0300726	0.0288241	0.0103704	-0.300162	-0.201935	-0.296303	-0.363317	-0.346161	-0.425427	0.578416	positive	640
Cla97C01G024250	Cla97C01G024250.1	0.258155	0.170082	0.382057	0.00969332	0.227314	0.0927998	-0.101802	-0.0616388	-0.207392	-0.131876	-0.335991	-0.301401	-0.0512578	-0.175441	-0.0485963	0.0732707	0.0634441	0.0620309	0.030713	0.0319087	0.04943	-0.0247042	-0.013718	0.00292018	-0.276866	negative	642
Cla97C01G024280	Cla97C01G024280.1	0.135203	0.157945	0.0419142	0.335078	0.273932	0.246734	0.123017	0.0900085	0.147287	-0.501927	-0.487323	-0.561869	0.0338229	0.0222264	0.0124231	0.0629628	-0.0248732	0.0738239	-0.0685186	-0.00797277	-0.0644166	-0.0551912	0.0124357	0.0032776	0.255476	positive	645
Cla97C01G024460	Cla97C01G024460.1	0.323395	0.458137	0.330381	-0.085431	-0.124701	-0.156905	-0.0761631	-0.143937	-0.0306963	-0.139104	-0.22868	-0.126294	-0.0594014	-0.18159	-0.201341	-0.423138	-0.436431	-0.33542	0.160136	0.0874976	0.0193287	0.408073	0.448637	0.513648	-0.325012	negative	648
Cla97C01G024480	Cla97C01G024480.1	0.259048	0.350321	0.220607	-0.0816628	-0.20452	-0.122526	-0.250813	-0.238668	-0.405141	0.109626	0.097359	0.266371	0.279206	0.243391	0.250159	-0.130988	-0.186746	-0.0927099	-0.110833	-0.100161	-0.120564	-0.0139994	0.0321523	-0.048907	0.801542	positive	649
Cla97C01G024510	Cla97C01G024510.1	0.224574	0.142914	0.0674619	-0.158162	-0.0551797	-0.090239	-0.137288	-0.135694	-0.0238965	0.0646928	0.105681	-0.00486523	-0.492944	-0.453751	-0.57152	0.0681894	0.0262926	0.0803927	0.0537505	0.0860679	0.0420372	0.385371	0.39535	0.380763	-0.416084	negative	650
Cla97C01G024520	Cla97C01G024520.1	0.166068	0.1003	0.171202	-0.0409762	0.0356195	-0.0306236	0.0114912	0.0028781	0.0186298	-0.125011	-0.187712	-0.121868	2.98536	2.98464	3.00641	-0.482817	-0.54733	-0.432078	-0.633682	-0.523161	-0.768512	-1.84754	-1.9955	-1.74579	0.913047	positive	651
Cla97C01G024530	Cla97C01G024530.1	-0.189376	-0.11431	-0.100371	0.157259	0.104744	0.065438	-0.150557	-0.0385209	-0.209184	0.186611	0.0953535	0.192914	-0.839345	-0.926417	-0.946432	0.159729	0.232443	0.10033	0.233977	0.211666	0.320632	0.525713	0.474544	0.45316	0.579031	positive	652
Cla97C01G024550	Cla97C01G024550.1	-0.284834	-0.254795	-0.356206	0.187525	0.266408	0.485315	0.263969	0.15893	-0.030156	-0.147006	-0.142145	-0.147006	-1.09212	-0.719386	-0.724922	0.0782142	0.118497	0.119224	0.167082	0.11637	0.175261	0.656787	0.563395	0.541599	0.406426	positive	653
Cla97C01G024590	Cla97C01G024590.1	0.98722	1.08336	1.10214	-0.0347686	-0.154492	-0.143832	-0.357107	-0.454738	-0.369473	-0.430784	-0.526776	-0.700746	2.00681	1.94749	1.94929	-0.198922	-0.278875	-0.241006	-0.596363	-0.687793	-0.73861	-1.06518	-0.962836	-1.13402	0.994199	positive	654
Cla97C01G024660	Cla97C01G024660.1	-0.543248	-0.543248	-0.382324	0.294039	0.307414	0.243064	0.36437	0.355032	0.363206	-0.133677	-0.12712	-0.197509	-0.60866	-0.605755	-0.581806	0.348125	0.399136	0.359194	0.233907	0.185602	0.206031	0.029157	0.00514029	0.0299301	0.923455	positive	655
Cla97C01G024680	Cla97C01G024680.1	0.546723	0.345788	0.501113	-0.271648	-0.280472	-0.312693	-0.097819	-0.0776844	-0.102506	-0.0853953	0.0175382	-0.182944	-0.385575	-0.449176	-0.264042	0.0095202	0.135283	0.106589	0.0218097	0.0797641	0.0538671	0.243006	0.18539	0.263565	-0.83161	negative	656
Cla97C01G024750	Cla97C01G024750.1	-0.988703	-1.11197	-1.04902	0.584814	0.529441	0.408345	-0.0185474	0.190863	0.0796121	0.437562	0.374903	0.562707	-2.04589	-1.94102	-1.92903	0.208181	0.252049	0.219122	0.942259	0.919945	0.946244	0.826893	0.793804	0.807458	0.889787	positive	658
Cla97C01G024770	Cla97C01G024770.1	0.578981	0.188364	0.185813	-0.183155	-0.0344531	-0.110804	-0.0389219	-0.021129	0.0123728	-0.394052	-0.113944	-0.0690734	0.330586	0.320351	0.350057	-0.605508	-0.733416	-0.562463	-0.104183	-0.104241	-0.177625	0.417387	0.463477	0.405578	0.235297	positive	659
Cla97C01G024920	Cla97C01G024920.1	-0.0609415	-0.057885	-0.0217026	0.0494664	0.0480485	-0.00394615	0.163853	0.150702	0.146733	-0.165622	-0.139539	-0.109165	-0.334969	-0.263314	-0.224786	0.184086	0.227262	0.145261	0.157621	0.129775	0.116609	-0.0424709	-0.0108431	-0.0842302	0.585722	positive	661
Cla97C01G024930	Cla97C01G024930.1	-0.0309678	-0.057879	-0.00309588	-0.0250551	-0.0488527	-0.0503532	-0.182313	-0.0369049	-0.213912	0.23478	0.160195	0.254358	0.107814	0.0778978	0.149566	-0.142708	-0.0648251	-0.0889866	-0.00836888	-0.0276589	0.0305669	-0.0120381	-0.0161722	-0.0050857	-0.0586868	negative	662
Cla97C01G025070	Cla97C01G025070.1	-0.137744	-0.665331	-0.522866	-0.0923015	0.0520124	-0.0115267	-0.210444	-0.169417	-0.00700179	0.529986	0.676894	0.55774	-1.11392	-1.14252	-0.822015	0.0992726	0.181983	0.0968912	0.226459	0.24816	0.306271	0.643218	0.618608	0.657595	0.801095	positive	664
Cla97C01G025130	Cla97C01G025130.1	0.751718	0.966387	0.827762	0.0298558	-0.161695	-0.0360178	-0.0866439	-0.287862	-0.163447	-0.51504	-0.731851	-0.593167	2.51203	2.44824	2.61472	-0.62756	-0.638463	-0.667214	-0.923969	-0.978552	-0.87566	-0.968457	-0.92318	-0.971938	0.928407	positive	666
Cla97C01G025410	Cla97C01G025410.1	0.0323463	0.0235672	-0.0105898	0.302898	0.262429	0.299265	0.0640869	0.104887	0.0626592	-0.431651	-0.548974	-0.160924	0.996393	1.0836	1.01127	1.0275	1.00939	1.08789	-0.776125	-0.674423	-0.64915	-1.44356	-1.35855	-1.31423	0.725407	positive	674
Cla97C01G025460	Cla97C01G025460.1	0.34311	0.401865	0.304542	-0.0358629	-0.0908876	-0.125577	-0.428087	-0.34213	-0.345843	0.11494	0.0862898	0.117639	0.372494	0.453585	0.472071	0.0642783	0.0802468	0.0923097	-0.0809347	-0.0429389	-0.0583398	-0.469644	-0.471289	-0.411839	0.35364	positive	677
Cla97C01G025560	Cla97C01G025560.1	0.0789734	0.15099	0.141855	0.0638521	0.0776053	0.0302996	0.00461294	-0.0127691	-0.0259445	-0.156699	-0.202503	-0.150273	-0.110836	-0.0897455	-0.0999101	-0.011809	-0.0433957	0.0467037	-0.0117959	0.00563055	-0.00765066	0.127823	0.104973	0.0900138	-0.91773	negative	679
Cla97C01G025620	Cla97C01G025620.1	0.35997	0.250832	0.252077	-0.477439	-0.370082	-0.160059	-0.190186	-0.255932	-0.153449	0.349537	0.24584	0.148891	0.252131	0.234158	0.368059	-0.105033	-0.0647556	-0.0966598	-0.193847	-0.1341	-0.165451	-0.0130976	-0.0556454	-0.0257596	0.680318	positive	681
Cla97C01G025750	Cla97C01G025750.1	0.0486289	-0.0145439	0.113187	0.11855	-0.00576484	-0.0292956	0.0805821	0.057033	0.0792074	-0.222576	-0.124284	-0.100723	0.360267	0.468586	0.394996	-0.338185	-0.185751	-0.242929	-0.136774	-0.206621	-0.212227	0.0264636	-0.0121777	0.0843525	-0.0913925	negative	686
Cla97C01G025780	Cla97C01G025780.1	-0.0122837	-0.079537	-0.00500107	-0.03881	0.0491776	0.0435695	0.0407572	0.029453	0.090558	-0.0137447	0.00945491	-0.113594	-0.0683864	-0.0441324	0.00774323	-0.0611609	-0.0108284	-0.0363772	0.0835163	0.00943144	0.0395332	0.0433855	0.0328494	0.00442627	0.378569	positive	687
Cla97C01G025920	Cla97C01G025920.1	-0.932923	-1.10019	-0.734595	-0.0614947	-0.04663	0.0456576	0.475645	0.437388	0.561155	0.626504	0.690007	0.039479	-2.28493	-2.08735	-2.25606	0.249499	0.226097	0.17814	0.949912	0.873825	0.951773	1.06703	1.0942	1.03787	0.948796	positive	691
Cla97C01G025990	Cla97C01G025990.1	0.72007	0.689403	0.745589	0.00530736	0.0262815	-0.139003	-0.169341	-0.205561	-0.150726	-0.628773	-0.471393	-0.421854	1.09133	1.11136	1.05222	-0.0236732	-0.0416801	-0.0716934	-0.580561	-0.615607	-0.5376	-0.507479	-0.381523	-0.495091	0.939906	positive	692
Cla97C01G026000	Cla97C01G026000.1	-0.263804	-0.221001	-0.278358	0.524025	0.493295	0.509272	0.204978	0.191838	0.232187	-0.428534	-0.410386	-0.553511	-1.34552	-1.26543	-1.33471	0.728194	0.79594	0.746212	0.482838	0.458819	0.473646	0.101545	0.0834842	0.0749815	0.638296	positive	693
Cla97C02G026240	Cla97C02G026240.1	0.156907	0.237326	0.29453	-0.0716247	-0.0321795	-0.050251	0.0842184	-0.024716	-0.0276967	-0.128085	-0.251582	-0.186846	2.53355	2.52307	2.53072	-0.358595	-0.351318	-0.261952	-0.448606	-0.529263	-0.580255	-1.70664	-1.65369	-1.69702	0.930385	positive	698
Cla97C02G026270	Cla97C02G026270.1	0.411633	0.460286	0.174319	-0.192702	-0.0926091	-0.16292	-0.0285466	-0.0465617	0.0667059	-0.201085	-0.370379	-0.0181407	0.826405	0.698064	0.772236	-0.524468	-0.444956	-0.295036	-0.335272	-0.352851	-0.2915	-0.00642349	-0.0718806	0.0256815	0.765571	positive	700
Cla97C02G026290	Cla97C02G026290.1	-0.0740704	-0.106596	-0.0925668	-0.06187	-0.0303262	-0.0303262	-0.258425	-0.220638	-0.272415	0.401697	0.377263	0.368274	0.1983	0.288879	0.347164	-0.074588	-0.0322098	-0.0546866	-0.149669	-0.165102	-0.155217	-0.0846199	-0.0916444	-0.0266063	-0.065878	negative	701
Cla97C02G026360	Cla97C02G026360.1	1.26927	1.0553	1.32919	0.299541	0.749626	0.895499	-1.37822	-0.398535	-0.813573	-1.31408	-0.504664	-1.18936	3.78917	3.97296	3.77898	1.40678	1.82494	1.51186	-1.02463	-1.15139	-1.17165	-4.36257	-4.21133	-4.36312	0.900676	positive	704
Cla97C02G026390	Cla97C02G026390.1	0.0658005	0.237257	0.0421607	-0.185147	-0.201654	-0.152689	0.151477	0.181066	0.000917684	-0.0519773	-0.188434	0.101223	-0.264571	-0.311649	-0.301809	0.246161	0.191176	0.19989	0.0265821	0.0978008	0.0482877	0.0235306	0.0466148	-0.00201384	-0.628156	negative	705
Cla97C02G026420	Cla97C02G026420.1	0.854865	0.975598	0.83615	0.102036	-0.206426	-0.109243	-0.380546	-0.529236	-0.406649	-0.449841	-0.362746	-0.323962	1.86437	1.80091	1.80782	0.0857712	0.081725	0.0753029	-0.670738	-0.625698	-0.699514	-1.27618	-1.27166	-1.17212	0.957627	positive	707
Cla97C02G026440	Cla97C02G026440.1	0.246493	0.243982	0.242725	-0.0582877	-0.133022	-0.271669	-0.443167	-0.670627	-0.561175	0.438825	0.459536	0.506388	0.452819	0.453745	0.394896	-0.233623	-0.14301	-0.117325	-0.100664	-0.122574	-0.0921851	-0.111538	-0.184961	-0.19558	0.270975	positive	708
Cla97C02G026450	Cla97C02G026450.1	-0.0748331	-0.350873	-0.614281	0.0292168	0.0923491	0.0950919	0.124923	0.28001	0.36655	-0.00415023	-0.0100328	0.0660294	-0.68978	-0.662742	-0.765548	0.0821085	0.120253	0.134583	0.265896	0.31447	0.119204	0.365076	0.383848	0.332631	0.760253	positive	709
Cla97C02G026460	Cla97C02G026460.1	-0.0404684	-0.0346334	-0.0302726	0.0529151	0.117224	0.101414	-0.0115267	-0.0492653	0.021054	-0.0774816	-0.025925	-0.0230338	-1.05629	-0.989537	-0.963666	0.0780257	0.159972	0.142542	0.373787	0.430474	0.393179	0.473259	0.491257	0.467	0.159038	positive	710
Cla97C02G026490	Cla97C02G026490.1	0.140129	0.228977	0.252178	-0.0130384	-0.166498	-0.106245	-0.024732	0.00863496	-0.0232651	-0.107799	-0.0649128	-0.123429	-0.198348	-0.180875	-0.201338	-0.0324499	-0.0440029	0.0362667	0.0912557	-0.000515299	0.0592396	0.150824	0.111344	0.208598	-0.815186	negative	711
Cla97C02G026500	Cla97C02G026500.1	-0.254914	-0.358593	-0.17802	-0.00865008	0.0578587	0.00607142	0.226998	0.292112	0.179735	0.000200834	-0.0430907	0.0802917	-0.0308638	-0.0353425	0.0291393	-0.0968594	-0.0594353	-0.0849815	0.0949255	0.0549298	0.0148151	0.0040394	0.0406505	0.068983	0.431609	positive	712
Cla97C02G026610	Cla97C02G026610.1	-0.312422	-0.153762	-0.285622	-0.0675352	-0.0418933	0.0605299	0.258041	0.260467	0.274943	0.0826406	-0.00937216	-0.0660142	-0.0659298	0.0173192	-0.0794108	-0.145148	-0.140023	-0.241344	-0.0230658	-0.164679	-0.0147959	0.258281	0.324521	0.274276	-0.0270053	negative	714
Cla97C02G026630	Cla97C02G026630.1	0.245885	0.176963	0.278551	-0.0400909	-0.0656793	-0.122992	0.0269555	-0.046071	-0.172828	-0.241501	-0.046071	0.00687791	0.708099	0.704189	0.512598	-0.148178	-0.145471	-0.244312	-0.149062	-0.0806923	-0.0623016	-0.503932	-0.42191	-0.169028	0.878654	positive	715
Cla97C02G026710	Cla97C02G026710.1	0.121704	0.229195	0.309298	0.0918161	0.0386876	0.00846547	0.045791	0.0157189	-0.0615603	-0.266251	-0.243558	-0.289306	0.24907	0.149071	0.135658	0.125573	0.154165	-0.0255652	-0.0944731	-0.161107	-0.170396	-0.192734	-0.111027	-0.0582343	0.696674	positive	716
Cla97C02G026860	Cla97C02G026860.1	0.531107	0.958152	0.297135	-0.0140435	-0.0247927	0.102022	-0.0845858	-0.192985	-0.0201761	-0.327201	-1.09103	-0.133606	1.6244	1.62885	1.83955	0.250459	0.460465	0.322963	-0.50221	-0.414796	-0.436723	-1.70248	-1.49598	-1.5745	0.813957	positive	718
Cla97C02G026960	Cla97C02G026960.1	-0.0530444	-0.0471559	-0.00231664	0.088744	0.0900805	0.0188894	0.0793541	0.128309	0.0562922	-0.158599	-0.101039	-0.0995145	0.390185	0.388943	0.482699	-0.194082	-0.118295	-0.178164	-0.105052	-0.0290026	-0.0287051	-0.156229	-0.22267	-0.229626	-0.0563749	negative	721
Cla97C02G026980	Cla97C02G026980.1	-0.310325	-0.250056	-0.215745	0.197171	0.105165	0.155838	0.335485	0.315682	0.308627	-0.205609	-0.173974	-0.26226	-1.16921	-0.975183	-1.08233	0.735191	0.807655	0.885147	0.355107	0.399557	0.355657	-0.19706	-0.058771	-0.0557656	0.78398	positive	722
Cla97C02G027010	Cla97C02G027010.1	-0.366468	-0.342785	-0.273981	-0.506362	-0.446241	-0.366468	-0.20831	0.00205904	-0.110082	0.995106	0.869787	0.753746	-0.409559	-0.480381	-0.542522	0.333226	0.309901	0.375606	0.267699	0.322178	0.234004	-0.244997	-0.0600967	-0.105058	-0.207949	negative	723
Cla97C02G027050	Cla97C02G027050.1	0.636384	0.482459	0.685486	-0.32196	-0.352136	-0.25986	-0.0865624	0.0232941	-0.301575	-0.245629	-0.0833951	-0.176504	0.793677	0.7705	0.761076	-0.445784	-0.508776	-0.582001	-0.0885326	-0.186983	-0.169092	-0.0895483	-0.128732	-0.125804	0.951437	positive	724
Cla97C02G027060	Cla97C02G027060.1	0.950325	0.785613	0.827249	0.00577333	-0.00530611	-0.0703034	-0.117609	-0.258207	-0.0903876	-0.877658	-0.66193	-0.487559	1.71868	1.72339	1.80762	-0.639281	-0.592466	-0.510176	-0.20437	-0.314349	-0.278415	-0.822599	-1.02418	-0.863857	0.93078	positive	725
Cla97C02G027070	Cla97C02G027070.1	-0.316663	-0.313043	-0.247655	0.000908798	0.0168184	-0.00638124	0.254947	0.257384	0.191371	0.052337	0.0339765	0.0759997	-0.370008	-0.341323	-0.390547	-0.081013	-0.066767	-0.0915084	0.186528	0.230033	0.32005	0.196342	0.191304	0.216909	0.917837	positive	726
Cla97C02G027140	Cla97C02G027140.1	0.31597	0.255648	0.20423	-0.0767901	-0.0908197	-0.0690545	-0.310343	-0.325009	-0.276099	0.145602	0.113332	0.113332	0.174224	0.139202	0.112759	0.639657	0.576433	0.604381	-0.205907	-0.265755	-0.313735	-0.510822	-0.478582	-0.471855	0.0235267	positive	727
Cla97C02G027180	Cla97C02G027180.1	-0.0189547	-0.229919	-0.0620679	-0.0174908	0.0426899	0.0271693	0.0157758	0.191883	-0.0248253	0.0328325	-0.0248253	0.0677325	-0.187945	-0.22663	-0.146172	0.0293334	0.0680951	-0.0039699	0.0678227	0.100278	0.0965413	0.0988853	0.0862598	0.0175012	0.68723	positive	728
Cla97C02G027270	Cla97C02G027270.1	-0.126159	-0.132643	-0.150626	0.00810612	0.0139887	0.0256823	-0.366726	-0.457417	-0.327146	0.485511	0.530322	0.497107	0.244022	0.266535	0.240722	-0.112968	-0.0543434	-0.125177	-0.0683821	-0.0865059	-0.0834489	-0.0404167	-0.0934102	-0.0866262	-0.223158	negative	729
Cla97C02G027300	Cla97C02G027300.1	-0.483608	-0.320036	-0.334664	-0.115163	-0.0994641	-0.108863	0.314402	0.261891	0.255801	0.20487	0.219964	0.20487	-1.25685	-1.23188	-1.22674	-0.0442263	0.0126381	-0.0142562	0.708674	0.689903	0.728624	0.562913	0.523981	0.54723	0.964186	positive	730
Cla97C02G027330	Cla97C02G027330.1	0.656961	0.547934	0.484314	-0.019787	-0.000260377	-0.0674456	-0.0488099	-0.0411155	-0.0503537	-0.72534	-0.343985	-0.392112	0.826464	0.89802	0.897797	-0.465416	-0.364836	-0.440953	-0.10545	-0.0729516	-0.237724	-0.237934	-0.325354	-0.371664	0.820114	positive	731
Cla97C02G027380	Cla97C02G027380.1	1.23113	0.849445	0.982065	-0.406748	-0.172703	-0.291756	-0.783791	-0.343075	-0.421524	-0.156722	-0.234725	-0.251599	-0.0831352	-0.0554081	-0.0660294	-0.102789	-0.128165	-0.105819	0.128195	0.183134	0.146314	-0.0361482	0.066248	0.0536026	-0.474523	negative	734
Cla97C02G027430	Cla97C02G027430.1	-0.392254	-0.267043	-0.227038	-0.119633	-0.132429	-0.146961	0.0371392	0.0399932	0.0126496	0.371016	0.426597	0.397962	-0.521802	-0.575248	-0.392871	-0.201943	-0.0715569	-0.220954	0.212761	0.156009	0.243254	0.471849	0.471378	0.429125	0.942983	positive	736
Cla97C02G027450	Cla97C02G027450.1	0.695969	0.703557	0.832867	0.200426	0.09763	0.130371	-0.212825	-0.284197	-0.155075	-0.590266	-0.411605	-1.00685	1.14319	1.15324	1.14894	0.149223	0.0674428	-0.0215718	-0.455101	-0.409976	-0.458117	-0.883087	-0.702788	-0.731393	0.948102	positive	738
Cla97C02G027560	Cla97C02G027560.1	0.631149	0.353152	0.475112	-0.357446	-0.232389	-0.112511	-0.0530425	0.0332475	-0.148095	-0.312708	-0.0918896	-0.184579	-0.0500984	-0.0772493	0.150411	-0.613164	-0.579263	-0.754706	0.688157	0.530177	0.699911	0.0561901	-0.111921	0.0615556	0.183422	positive	740
Cla97C02G027660	Cla97C02G027660.1	-0.0722756	-0.0981611	-0.0828782	0.0575247	0.0875535	0.0506119	0.215446	0.0889037	0.249652	-0.145006	-0.200003	-0.151368	-0.298888	-0.22985	-0.214154	0.0499176	0.0714174	0.0389738	0.14117	0.110998	0.116857	0.0623332	0.0364467	0.114778	0.438015	positive	741
Cla97C02G027670	Cla97C02G027670.1	-0.0313322	0.292372	0.253994	-0.127803	-0.331576	-0.197559	0.159831	-0.127803	-0.124639	0.0660294	0.116369	0.0521171	0.0691099	-0.051047	0.00483371	-0.265065	-0.2607	-0.238989	0.0995781	0.103945	0.0846709	0.145941	0.150344	0.157379	0.521283	positive	742
Cla97C02G027680	Cla97C02G027680.1	0.041725	0.331617	0.383878	0.0203514	0.045962	0.073895	0.0944955	-0.102442	-0.142057	-0.174551	-0.296204	-0.276671	-0.690193	-0.629534	-0.701649	0.196405	0.227464	0.170586	0.350948	0.270817	0.338206	0.195299	0.12842	0.143231	-0.654904	negative	743
Cla97C02G027730	Cla97C02G027730.1	-0.536304	-0.544917	-0.48983	0.012426	0.00948773	0.00801634	0.0853989	0.142841	0.104801	0.411228	0.436607	0.360244	0.239846	0.176267	0.223264	0.584592	0.592502	0.585778	-0.266954	-0.323723	-0.299305	-0.480394	-0.506764	-0.525111	-0.593564	negative	744
Cla97C02G027740	Cla97C02G027740.1	0.745999	-0.0722575	0.0805434	-0.368874	-0.28881	-0.24318	-0.497974	-0.129224	-0.191997	0.0675655	0.380193	0.518015	-0.919381	-1.05799	-0.900376	0.439321	0.491833	0.457512	0.24298	0.232036	0.291078	0.281804	0.224236	0.216946	-0.446179	negative	745
Cla97C02G027820	Cla97C02G027820.1	0.247319	0.00708824	0.283539	-0.0103464	-0.0915194	-0.0354117	0.0775463	0.297776	0.0142909	-0.344384	-0.162837	-0.28306	-0.236147	-0.26941	-0.269677	0.117696	-0.00840443	0.0910398	0.30354	0.291599	0.232229	-0.136119	-0.0241121	-0.0922332	0.105201	positive	746
Cla97C02G027850	Cla97C02G027850.1	0.744476	0.71563	0.738013	-0.242684	-0.188913	-0.352693	0.108887	0.0579034	0.188245	-0.560054	-0.446328	-0.762484	-0.797378	-0.645834	-0.724599	-0.201899	-0.13625	-0.212412	0.812329	0.837581	0.807635	0.118064	0.0553284	0.0874351	-0.393574	negative	747
Cla97C02G027950	Cla97C02G027950.1	0.248534	0.153959	0.27394	-0.133522	-0.0277432	-0.065179	-0.185341	-0.0426011	-0.108294	0.0597197	-0.065179	-0.108294	1.20561	1.26155	1.25012	0.016989	-0.0943028	0.00939389	-0.417943	-0.449433	-0.581525	-0.704697	-0.753733	-0.742031	0.820496	positive	749
Cla97C02G028160	Cla97C02G028160.1	-0.0168027	-0.0539302	0.269501	-0.142334	-0.0782033	-0.00366731	-0.0345047	0.0307867	-0.0374763	0.19803	0.118834	-0.250233	-0.245205	0.0134651	-0.273948	0.116283	0.11093	0.066808	0.0430627	-0.0423012	0.126035	0.00798419	0.056928	0.0199585	-0.489	negative	750
Cla97C02G028170	Cla97C02G028170.1	0.112494	0.223724	0.145722	-0.355028	-0.0861178	-0.280748	0.0976277	0.0715831	0.0826066	0.133848	-0.203396	0.0576842	-0.411246	-0.538313	-0.610975	-0.205293	-0.281429	-0.156069	0.466009	0.397815	0.443998	0.290799	0.289045	0.315658	-0.00697759	negative	751
Cla97C02G028230	Cla97C02G028230.1	-0.283509	-0.339736	-0.250099	0.140396	0.246459	0.180928	0.243993	0.212805	0.264822	-0.0613703	-0.159164	-0.195523	-1.74754	-1.84865	-2.07959	-0.182198	-0.0331907	-0.0883386	0.751162	0.667253	0.64817	1.22446	1.42187	1.26659	0.471832	positive	752
Cla97C02G028440	Cla97C02G028440.1	-0.195136	-0.224422	-0.173136	0.203178	0.104104	-0.0883426	0.0619174	0.0845706	0.113773	0.0301768	0.0619174	0.0213977	0.800756	0.902162	0.829413	-0.364863	-0.13916	-0.369594	-0.217818	-0.305601	-0.271475	-0.343055	-0.205279	-0.315485	-0.847825	negative	755
Cla97C02G028480	Cla97C02G028480.1	0.25824	0.250929	0.353475	-0.0691681	-0.155583	0.0647262	-0.00212323	-0.1459	-0.230351	-0.153965	0.0549641	-0.225244	0.150855	0.180205	0.118078	-0.25122	-0.364972	-0.241003	-0.0330901	-0.0271781	-0.0604878	0.205317	0.206957	0.116539	0.359703	positive	756
Cla97C02G028490	Cla97C02G028490.1	-0.29199	-0.244162	-0.270537	0.0107187	-0.00101061	-0.0158076	0.176094	0.156429	0.205735	0.140502	0.0396314	0.0943972	-0.985038	-1.05686	-1.13806	0.438165	0.267128	0.431692	0.596862	0.504805	0.562488	0.0722014	0.192042	0.114576	0.913251	positive	757
Cla97C02G028500	Cla97C02G028500.1	-0.349063	-0.427375	-0.37912	0.233419	0.117114	0.129175	0.0425464	0.000851237	0.035443	0.133174	0.204577	0.259259	-0.600333	-0.577358	-0.609665	0.0710257	0.153036	0.182251	0.132222	0.0916285	0.096222	0.407792	0.375299	0.27788	0.945799	positive	758
Cla97C02G028520	Cla97C02G028520.1	-0.152512	-0.14131	-0.15734	0.116401	0.0921984	0.0312694	0.125704	0.220551	0.192999	-0.101997	-0.128613	-0.0973507	0.0257955	0.116479	0.0971468	0.0435254	0.0157716	-0.00596272	-0.0707295	-0.105501	-0.0658364	-0.0154917	-0.0627144	0.0275177	-0.620552	negative	759
Cla97C02G028780	Cla97C02G028780.1	0.0585369	-0.127399	0.130113	-0.05821	0.0404246	-0.0138614	0.000623634	0.153635	0.0149647	0.0362124	-0.0870194	-0.14802	0.63094	0.568234	0.450131	-0.0915956	-0.145722	-0.249409	-0.182434	-0.209547	-0.198507	-0.218565	-0.172246	-0.18128	0.0711802	positive	766
Cla97C02G028810	Cla97C02G028810.1	0.397645	0.369211	0.290123	-0.135876	-0.0473589	-0.106828	-0.507557	-0.492868	-0.349871	0.223067	0.148732	0.211581	0.0621214	0.0271695	0.0931847	0.206983	0.268176	0.223475	-0.119503	-0.156219	-0.0944727	-0.166547	-0.192577	-0.151791	0.116348	positive	767
Cla97C02G028840	Cla97C02G028840.1	0.518885	0.501029	0.554967	0.126633	0.111483	0.069337	-0.0697356	-0.127387	-0.0791856	-0.493696	-0.542969	-0.569361	0.126477	0.105358	0.141974	0.199085	0.221495	0.243486	-0.00380842	-0.00287557	0.0565882	-0.37161	-0.355462	-0.360706	0.826134	positive	768
Cla97C02G028970	Cla97C02G028970.1	-0.535444	-0.695639	-0.461559	-0.136578	-0.322271	-0.0936633	-0.182607	-0.304544	-0.179014	0.980506	1.04492	0.885897	-1.98625	-1.94025	-1.99073	0.664474	0.663771	0.670354	0.660102	0.614154	0.614026	0.674543	0.671361	0.68445	0.564532	positive	769
Cla97C02G029100	Cla97C02G029100.1	-0.107942	-0.185162	-0.0677792	-0.0301873	-0.00517309	-0.118949	0.111089	0.0907599	0.108395	-0.0110199	0.163941	0.0520275	-0.416277	-0.397155	-0.448394	0.476924	0.433894	0.448988	0.0387153	-0.00535301	0.0101428	-0.0635631	-0.068444	-0.0094781	0.188983	positive	771
Cla97C02G029160	Cla97C02G029160.1	0.165616	-0.0352364	0.0866732	0.291473	0.359075	-0.0731444	0.00607054	-0.00707817	0.0476414	-0.515584	-0.331577	0.00607054	-0.713913	-0.662522	-0.712272	0.254244	0.217583	0.199151	0.228516	0.230512	0.254342	0.280055	0.161531	0.262774	-0.182973	negative	773
Cla97C02G029270	Cla97C02G029270.1	0.188392	0.174429	0.17825	-0.326903	-0.378367	-0.425923	-0.0220483	-0.0205873	-0.0665794	0.335967	0.148689	0.214681	1.1178	1.09849	1.10689	-0.242361	-0.144259	-0.206591	-0.480042	-0.416917	-0.455773	-0.535944	-0.422522	-0.418772	0.282847	positive	776
Cla97C02G029420	Cla97C02G029420.1	0.672164	0.481904	0.352323	-0.169719	-0.0607847	-0.0983	-0.41588	-0.115826	0.0562347	-0.201687	-0.266049	-0.234379	4.51009	4.46532	4.45789	-0.373742	-0.470157	-0.413412	-2.24195	-2.16373	-2.10415	-1.94673	-1.89609	-1.82334	0.913211	positive	777
Cla97C02G029440	Cla97C02G029440.1	-0.127702	-0.212783	-0.100941	0.0583744	0.0708894	0.0860396	0.0527771	0.165988	0.110493	0.0172934	-0.051875	-0.0685538	-0.0663371	-0.00523939	-0.0663977	0.176849	0.160464	0.128143	0.129822	0.0743713	0.128685	-0.192149	-0.206725	-0.261486	0.559314	positive	779
Cla97C02G029450	Cla97C02G029450.1	-0.045323	-0.0053073	0.00343634	0.0562151	0.0715408	0.00633914	0.08396	0.0908137	-0.00676973	-0.0911267	-0.0710996	-0.0926788	-0.198983	-0.189214	-0.157875	0.149757	0.17066	0.129145	-0.0403578	-0.0413288	0.0363109	0.101491	0.0278872	0.0125094	0.118853	positive	780
Cla97C02G029470	Cla97C02G029470.1	-0.149502	-0.152755	-0.151127	0.0319302	0.0645109	0.0687068	0.249608	0.182787	0.208367	-0.0952948	-0.0781845	-0.179046	-0.447488	-0.399459	-0.552055	0.164154	0.11955	0.144177	0.351612	0.293084	0.26829	-0.046231	0.0522873	0.0520781	0.814553	positive	781
Cla97C02G029500	Cla97C02G029500.1	-0.246347	-0.211371	-0.00112434	-0.00411438	-0.10804	-0.0343607	-0.0146286	-0.197615	-0.134006	0.493448	0.135564	0.322595	-1.40485	-1.46522	-1.40783	0.206154	0.137859	0.201212	0.482941	0.434471	0.504554	0.768332	0.7972	0.745176	0.554947	positive	782
Cla97C02G029510	Cla97C02G029510.1	0.425976	0.724607	0.632427	0.2968	0.316683	0.32038	-0.0605953	-0.104539	-0.0832136	-0.429362	-1.18438	-0.854786	-0.234695	-0.322009	-0.146463	-0.132651	-0.171014	-0.144914	0.121776	0.13971	0.180488	0.202547	0.286249	0.220976	-0.902919	negative	783
Cla97C02G029580	Cla97C02G029580.1	0.032673	-0.338958	-0.0608197	0.0109561	-0.204161	-0.240166	0.069558	0.125872	0.035544	-0.00517994	0.407643	0.167038	-0.134722	-0.146355	-0.151072	-0.153329	-0.186277	-0.177712	0.00728112	-0.090214	0.00964091	0.344156	0.400036	0.278566	0.697584	positive	784
Cla97C02G029600	Cla97C02G029600.1	0.441655	0.361608	0.380913	-0.0772504	-0.0496235	-0.0329972	-0.119709	-0.0633708	-0.114929	-0.274552	-0.200107	-0.251637	1.05	0.997448	1.01373	0.0779663	0.100881	0.129328	-0.309554	-0.303454	-0.287409	-0.807669	-0.833629	-0.827641	0.968728	positive	785
Cla97C02G029630	Cla97C02G029630.1	-0.128291	-0.0410136	-0.0306504	0.0704579	0.121795	0.100402	-0.0159738	-0.0247618	-0.0529491	0.00576483	-0.0277031	0.022923	0.538421	0.487339	0.488682	0.0928478	0.144606	0.113764	-0.189327	-0.197431	-0.140629	-0.410065	-0.479271	-0.448938	-0.184313	negative	786
Cla97C02G029660	Cla97C02G029660.1	-0.209302	-0.320334	-0.239676	0.141719	0.184287	0.105931	0.131207	0.0470374	0.132525	-0.0861389	0.128567	-0.0158226	0.332317	0.561488	0.428192	-0.035703	-0.0356759	-0.0207152	-0.339953	-0.380322	-0.28879	0.00844889	-0.0950612	-0.134226	-0.838007	negative	788
Cla97C02G029780	Cla97C02G029780.1	-0.0794933	-0.116847	-0.181335	-0.0341218	-0.0748914	-0.102726	0.0412925	0.0761925	0.0285189	0.10892	0.0734314	0.261058	-0.439671	-0.442101	-0.543459	0.337018	0.369207	0.358902	0.139751	0.129847	0.102194	0.0510043	-0.0280795	-0.0346129	0.285883	positive	790
Cla97C02G029840	Cla97C02G029840.1	-0.320471	-0.206652	-0.181989	0.109294	0.072871	0.0918719	0.0945661	0.0199987	0.0341014	0.103956	0.0480676	0.134385	0.315172	0.453237	0.446453	-0.209013	-0.0435992	-0.0667085	-0.246056	-0.193633	-0.237437	-0.0924903	-0.120894	-0.00503154	-0.84728	negative	791
Cla97C02G029870	Cla97C02G029870.1	0.18679	-0.00365666	0.0253432	0.0181477	-0.366436	-0.414307	-0.103716	0.0109161	-0.0558529	-0.0452615	0.345835	0.402198	-0.392854	-0.321993	-0.36403	0.296903	0.281738	0.289697	0.101731	0.136366	0.077043	-0.0704676	0.0146087	-0.0487418	-0.489896	negative	793
Cla97C02G029880	Cla97C02G029880.1	-0.252177	-0.347019	-0.197793	0.0596712	0.0652414	-0.0206587	0.102288	0.2093	0.0776964	0.11174	0.0652414	0.126468	-2.1715	-2.02501	-2.12382	0.129237	0.182837	0.165316	0.816732	0.796443	0.796147	1.14739	1.12279	1.16344	0.938799	positive	794
Cla97C02G029890	Cla97C02G029890.1	-0.0618113	0.0939954	0.217131	0.0396528	-0.0910509	-0.135251	-0.375385	-0.189144	-0.280147	0.314237	0.217131	0.25064	0.0524248	0.0621043	0.0830743	0.218043	0.278062	0.272719	-0.0837579	-0.0923127	-0.0578531	-0.213599	-0.290979	-0.227926	-0.32484	negative	795
Cla97C02G029910	Cla97C02G029910.1	0.187239	0.215204	0.301926	0.00409747	-0.0164499	0.020039	0.167856	0.0724035	0.0272273	-0.332477	-0.349135	-0.297931	0.0958017	0.13447	0.0854245	-0.0893698	-0.216829	-0.118348	0.127889	-0.0099057	-0.00188528	0.00653933	-0.0452861	0.0314997	0.385928	positive	796
Cla97C02G029920	Cla97C02G029920.1	0.396894	0.37765	0.356991	0.251498	0.207298	0.214972	-0.147052	-0.0704305	-0.140509	-0.525399	-0.519021	-0.402891	0.144777	0.207639	0.119426	-0.180005	-0.23433	-0.199629	-0.0330653	-0.0844273	-0.0470292	0.113906	0.0557963	0.136941	-0.14663	negative	797
Cla97C02G029960	Cla97C02G029960.1	0.0297615	-0.0315148	0.130439	0.0733763	0.111668	-0.00933044	0.0168482	0.0453891	0.0326155	-0.115907	-0.169018	-0.114328	-0.277374	-0.14692	-0.294566	0.0778043	0.092566	0.14039	-0.00316743	0.0488969	-0.0435547	0.170219	0.0234495	0.212255	-0.441836	negative	799
Cla97C02G029990	Cla97C02G029990.1	0.31912	0.441618	0.262912	-0.0672717	-0.058102	-0.155789	0.0894764	0.0103273	0.0362447	-0.325103	-0.305078	-0.248355	0.160049	0.125032	0.142173	-0.118781	-0.0618633	-0.0781399	-0.146632	-0.145374	-0.137038	0.0736553	0.0878874	0.0990314	0.215179	positive	800
Cla97C02G030110	Cla97C02G030110.1	-0.108212	-0.106651	-0.014517	0.0898877	0.126175	0.0748381	0.0966769	0.126175	0.111502	-0.12391	-0.159061	-0.112903	-0.208916	-0.207727	-0.273744	0.160704	0.160882	0.173872	0.0204508	-0.0403847	0.031766	0.0633339	0.0620762	0.0576871	0.377138	positive	802
Cla97C02G030130	Cla97C02G030130.1	-0.0725738	-0.0604375	0.0900541	0.0500342	0.0472328	-0.299799	-0.0863503	-0.0786805	-0.00124172	0.157849	0.0639599	0.189953	0.00905768	-0.00125225	0.125602	0.021383	0.151211	0.0194478	-0.0851642	-0.139749	-0.150252	-0.00675913	0.0564705	5.07745e-06	0.258149	positive	803
Cla97C02G030140	Cla97C02G030140.1	0.334491	0.215649	0.192949	-0.246444	-0.203984	-0.177451	0.02032	-0.0174187	-0.0203629	-0.136946	0.0160156	0.0231825	-0.469816	-0.362449	-0.171873	-0.0515138	-0.132966	-0.0915854	0.216377	-0.00966452	0.0240297	0.261694	0.343826	0.443941	-0.420686	negative	804
Cla97C02G030150	Cla97C02G030150.1	0.217558	-0.0879561	0.258096	0.00303468	0.0721844	0.0116822	-0.0925826	0.0666621	-0.176863	-0.130139	-0.0335653	-0.108112	1.83854	1.8244	1.84943	-0.421565	-0.72057	-0.401459	-1.0952	-0.9117	-0.830465	-0.383883	-0.455011	-0.292519	0.559225	positive	805
Cla97C02G030160	Cla97C02G030160.1	-0.228223	-0.0877941	0.04017	0.118247	0.056962	-0.00268546	0.0953995	0.0680491	0.0331153	-0.0157943	-0.0246002	-0.0528456	-0.263675	-0.236059	-0.317195	0.00266173	0.00309717	-0.0995336	0.132887	0.0619102	0.13162	0.209749	0.171961	0.202577	0.369918	positive	806
Cla97C02G030360	Cla97C02G030360.1	-0.356316	-0.264276	-0.305886	-0.315093	-0.285836	-0.373525	0.157877	0.122852	0.121488	0.547403	0.440957	0.510356	-1.82757	-1.75611	-1.85692	0.541019	0.614422	0.574223	0.85579	0.752145	0.763862	0.450014	0.433975	0.455154	0.485244	positive	807
Cla97C02G030460	Cla97C02G030460.1	-0.21101	-0.11559	-0.0637709	-0.384904	-0.500712	-0.392875	-0.0749484	-0.186557	-0.190025	0.68681	0.797771	0.635812	0.325845	0.200564	0.353943	-0.65938	-0.609745	-0.720534	-0.411271	-0.470109	-0.378904	0.73328	0.805095	0.831216	0.872289	positive	808
Cla97C02G030480	Cla97C02G030480.1	0.00671726	0.137466	0.0251319	-0.198199	-0.0829748	-0.113639	0.119121	0.040532	0.182333	0.0653828	-0.122967	-0.0589042	-0.277211	-0.313045	-0.385448	-0.240191	-0.295394	-0.248097	0.0980978	0.0939222	0.0501802	0.482799	0.543379	0.491007	0.0138954	positive	809
Cla97C02G030600	Cla97C02G030600.1	-0.378305	-0.27508	-0.348051	0.191933	0.186776	0.169887	0.190645	0.171193	0.213647	-0.0544671	-0.0498944	-0.0182848	-0.847817	-0.874109	-0.817317	0.13083	0.162163	0.156469	0.40908	0.442963	0.438764	0.273865	0.296154	0.228954	0.883918	positive	811
Cla97C02G030730	Cla97C02G030730.1	0.507454	0.354413	0.385219	0.112671	0.116756	-0.135171	-0.0594714	-0.0140999	-0.0518097	-0.677065	-0.397234	-0.141662	-0.330957	-0.3596	-0.45922	-0.112889	-0.152291	-0.0627984	0.0985686	0.122959	0.1959	0.362767	0.367903	0.329658	-0.893533	negative	813
Cla97C02G030740	Cla97C02G030740.1	-0.181224	-0.264267	-0.2978	0.0856482	0.111423	0.123474	0.0510163	0.034093	0.0453972	0.0870163	0.0911129	0.11411	-0.371974	-0.367524	-0.273446	0.43294	0.502491	0.478248	0.0243057	0.0619515	0.0644414	-0.169985	-0.165621	-0.215827	0.644583	positive	814
Cla97C02G030820	Cla97C02G030820.1	-0.00639533	0.104692	0.176469	-0.134929	-0.312662	-0.285111	-0.240331	-0.515409	-0.460961	0.44894	0.673363	0.552336	-0.0892927	-0.210127	-0.156514	0.00465548	-0.000808287	0.0122226	0.0366238	0.0736896	0.0896044	0.0423087	0.12133	0.0763072	0.00415282	positive	817
Cla97C02G030830	Cla97C02G030830.1	0.0173891	-0.25635	-0.0702539	0.0613901	0.174284	0.100011	0.094557	0.166507	0.068363	-0.179999	-0.134454	-0.0414445	0.452948	0.306722	0.397505	-0.301701	-0.321801	-0.318261	-0.176792	-0.105426	-0.318507	0.0631941	0.12792	0.1942	-0.667119	negative	818
Cla97C02G030870	Cla97C02G030870.1	-0.212008	-0.206931	-0.232497	-0.0608531	-0.0291443	-0.0486913	0.0938953	0.130455	0.175214	0.125097	0.0773442	0.188119	0.0321966	0.142761	0.0679993	-0.32149	-0.199773	-0.14707	0.0351721	-0.025097	-0.0761894	0.166631	0.0648311	0.260028	0.149548	positive	820
Cla97C02G030880	Cla97C02G030880.1	-1.08452	-0.80356	-0.892322	-0.812493	-0.573554	-0.734019	0.91368	0.813693	0.807875	0.806903	0.751408	0.806903	-4.67265	-4.755	-4.78231	0.128287	0.220658	0.106027	2.59179	2.60515	2.6047	2.0265	1.95439	1.97246	0.846896	positive	821
Cla97C02G030910	Cla97C02G030910.1	1.19261	1.07773	0.962122	-0.026223	0.0114217	0.0449557	-0.440155	-0.28132	-0.277367	-0.967727	-0.799573	-0.496474	2.90354	2.93291	2.79616	-0.0736554	-0.166745	-0.0970734	-1.47415	-1.58413	-1.21437	-1.39948	-1.2002	-1.42279	0.955697	positive	822
Cla97C02G030990	Cla97C02G030990.1	-0.500976	-0.437121	-0.407209	0.00684147	-0.0398225	-0.0155495	0.366776	0.4111	0.387403	0.093084	0.0734169	0.0620571	-1.37004	-1.23236	-1.25823	0.514215	0.530739	0.527031	0.502909	0.451308	0.505902	0.272973	0.237245	0.318314	0.866387	positive	823
Cla97C02G031040	Cla97C02G031040.1	0.127142	0.0852439	0.144357	-0.14632	0.0491399	-0.177242	0.201143	0.12581	0.108371	-0.144711	-0.207161	-0.165773	-0.163385	-0.0336693	-0.0707174	-0.487652	-0.202816	-0.417645	-0.069239	0.0440896	0.152348	0.401818	0.472529	0.374338	-0.208816	negative	825
Cla97C02G031060	Cla97C02G031060.1	0.451317	0.409341	0.387331	-0.240397	-0.456237	-0.384427	-0.173439	-0.0067892	-0.0541921	0.0105929	0.0376932	0.019206	-0.583902	-0.629298	-0.493872	-0.170535	-0.136028	-0.178312	0.382065	0.375446	0.402765	0.363668	0.334803	0.333199	-0.452508	negative	826
Cla97C02G031080	Cla97C02G031080.1	-0.41664	-0.507483	-0.418642	-0.234538	-0.223995	-0.192819	0.209743	0.208446	0.198029	0.380676	0.527257	0.469966	-0.847924	-0.958588	-0.800574	-0.203311	-0.137347	-0.104534	0.46646	0.55077	0.568299	0.440385	0.52879	0.497573	0.934485	positive	827
Cla97C02G031100	Cla97C02G031100.1	0.96131	0.974599	0.850345	0.188581	0.274366	0.30362	-0.0361891	-0.137987	-0.0853285	-1.1797	-1.18339	-0.930226	-0.00357519	-0.0203124	-0.158728	0.248364	0.113039	0.217434	0.00757485	-0.0225044	-0.0348569	-0.158497	-0.0746136	-0.113324	0.332938	positive	828
Cla97C02G031130	Cla97C02G031130.1	0.119405	0.0345571	0.132851	0.252234	0.292329	0.248534	-0.0724683	-0.064774	-0.0786535	-0.288446	-0.261811	-0.313757	1.17493	1.23454	1.24628	-0.0885329	-0.0615494	-0.104183	-0.367176	-0.381848	-0.325059	-0.757633	-0.784551	-0.785218	0.558213	positive	829
Cla97C02G031170	Cla97C02G031170.1	0.300192	0.205575	0.176066	0.235737	0.121917	0.149905	-0.0584758	-0.0208447	-0.0193597	-0.366743	-0.311177	-0.412791	0.644737	0.525924	0.406465	0.160405	0.148304	0.176463	-0.225825	-0.243377	-0.208132	-0.463269	-0.510551	-0.411145	0.911075	positive	831
Cla97C02G031400	Cla97C02G031400.1	0.547969	0.760758	0.671318	0.109713	0.330281	0.172177	-0.316241	-0.345115	-0.287934	-0.154173	-0.985573	-0.50318	1.16767	1.12857	1.08349	0.208005	0.114792	0.205521	-0.466599	-0.475011	-0.454318	-0.864546	-0.826359	-0.821213	0.917884	positive	833
Cla97C02G031420	Cla97C02G031420.1	0.733651	0.554817	0.654149	0.0257719	0.0345599	-0.0372904	-0.259171	-0.0542726	-0.194419	-0.607746	-0.502296	-0.347753	1.18253	1.10844	1.15661	-0.0898516	-0.148355	-0.103418	-0.297841	-0.267523	-0.277846	-0.816484	-0.72341	-0.722856	0.98104	positive	834
Cla97C02G031480	Cla97C02G031480.1	0.0739351	-0.0437255	0.050318	-0.107924	-0.0785274	-0.0877459	0.0917379	0.101234	0.0461098	-0.0185314	-0.00246072	-0.02442	0.0293745	0.0691649	-0.0385615	-0.33756	-0.399463	-0.311588	0.294212	0.222437	0.36173	0.017523	-0.00317059	0.0959023	0.80612	positive	835
Cla97C02G031500	Cla97C02G031500.1	-0.192933	0.0986923	0.0850174	0.170377	0.0304111	0.10954	0.0986923	-0.110378	-0.0869701	0.0189497	-0.0367711	-0.184627	-0.309158	-0.380724	-0.321947	0.187945	0.207701	0.207213	-0.00590917	-0.0244305	0.0103989	0.169646	0.0753372	0.183926	0.0797665	positive	836
Cla97C02G031650	Cla97C02G031650.1	0.276833	0.415683	0.346752	-0.185071	0.0571142	-0.042627	-0.267333	-0.331791	-0.36996	0.121807	-0.0785207	0.0571142	0.0564214	0.0178946	0.116516	-0.152003	-0.132924	-0.126817	0.0517552	-0.00460685	-0.000879052	0.0531132	0.0486111	0.0729186	0.329155	positive	839
Cla97C02G031680	Cla97C02G031680.1	-0.412755	-0.26273	-0.208546	0.00475076	0.00622969	0.00622969	-0.121991	-0.113936	-0.0963712	0.478504	0.355103	0.365511	-0.43171	-0.425379	-0.339034	0.195908	0.242934	0.184573	0.0797814	0.0611581	0.0724655	0.103701	0.123066	0.132537	0.653976	positive	841
Cla97C02G031710	Cla97C02G031710.1	-0.545158	-0.429515	-0.469761	0.274126	0.223283	0.281419	-0.131196	-0.0405092	-0.054213	0.352385	0.298293	0.240846	0.273717	0.294776	0.360415	0.759373	0.741498	0.824426	-0.269503	-0.345223	-0.32947	-0.883785	-0.688667	-0.737556	-0.207985	negative	842
Cla97C02G031790	Cla97C02G031790.1	-0.440545	-0.919099	-0.605665	0.0114998	0.00109397	-0.000398734	0.261141	0.339931	0.272311	0.345817	0.402265	0.331649	-1.00685	-0.93048	-0.991578	0.164503	0.215816	0.25711	0.296351	0.307499	0.273254	0.482715	0.449642	0.482015	0.938219	positive	845
Cla97C02G031810	Cla97C02G031810.1	-0.655827	-0.580251	-0.740715	0.242471	-0.603446	-0.31224	0.248961	0.888979	0.841673	0.334442	0.27336	0.0625926	-1.39589	-1.24829	-1.28369	0.752864	0.812532	0.709312	1.55338	1.5278	1.50749	-0.879955	-1.01035	-1.04521	0.571985	positive	846
Cla97C02G031980	Cla97C02G031980.1	-0.0233815	-0.0366512	-0.054536	0.098966	0.0894968	0.120379	0.154512	0.145402	0.129649	-0.201217	-0.228027	-0.194591	0.0974536	0.169889	0.0348085	0.0308484	0.0811135	0.0148823	-0.122142	-0.141822	-0.121054	0.0295328	-0.00892497	-0.0645855	-0.292904	negative	847
Cla97C02G032020	Cla97C02G032020.1	0.198855	0.0895978	0.233923	0.0224184	-0.00652326	-0.0138503	-0.0153202	-0.0753786	-0.028617	-0.160639	-0.0375502	-0.206915	0.0592062	0.0274078	0.0724744	-0.269392	-0.228266	-0.270819	-0.0294174	-0.00511625	0.0394225	0.219282	0.207837	0.177382	-0.202963	negative	848
Cla97C02G032030	Cla97C02G032030.1	0.0693712	-0.0180916	0.122518	-0.386225	-0.485904	-0.492368	-0.516323	-0.348596	-0.308117	0.763268	0.816543	0.783923	-0.171162	-0.153009	-0.114505	-0.0764981	-0.102053	-0.107089	0.0456003	-0.0401502	0.0156622	0.262166	0.201132	0.239905	0.727056	positive	849
Cla97C02G032040	Cla97C02G032040.1	-0.150481	-0.163363	-0.0513733	-0.00861271	-0.00136661	0.00584327	0.135085	0.109879	0.0869463	-0.0057099	0.018731	0.0244221	-0.449196	-0.36224	-0.405186	-0.154412	-0.124012	-0.148972	0.117849	0.0459947	0.113536	0.481048	0.434055	0.451536	0.588979	positive	850
Cla97C02G032050	Cla97C02G032050.1	0.0601007	0.172575	-0.0348666	-0.128571	-0.165545	-0.00396629	0.118772	0.106688	0.314755	-0.0259702	-0.106521	-0.307451	0.880221	0.782877	0.809549	-0.142999	-0.163079	-0.160565	-0.317369	-0.307126	-0.297468	-0.345375	-0.359541	-0.379126	0.221062	positive	851
Cla97C02G032090	Cla97C02G032090.1	1.55379	1.61935	1.51258	0.245028	0.232189	0.206165	-0.779139	-0.951503	-0.537381	-0.966224	-1.26522	-0.869651	3.20553	3.09836	3.15237	1.60175	1.45784	1.51707	-1.04854	-1.07549	-1.15053	-3.55986	-3.54396	-3.65455	0.93208	positive	853
Cla97C02G032130	Cla97C02G032130.1	0.428244	0.371925	0.51089	-0.166139	-0.26985	-0.416884	-0.278839	-0.161144	-0.785704	0.158122	0.158122	0.451257	0.449823	0.457784	0.557162	-0.0670382	0.0138906	-0.0286113	-0.234419	-0.290935	-0.263455	-0.192275	-0.228344	-0.173582	0.604874	positive	854
Cla97C02G032240	Cla97C02G032240.1	-0.357439	-0.458586	-0.412971	0.192025	0.173942	0.183012	0.348769	0.348769	0.320868	-0.138271	-0.0953443	-0.104774	-0.333189	-0.400487	-0.295208	0.595989	0.585858	0.603376	0.123239	0.0784464	0.0999745	-0.41623	-0.20819	-0.433577	0.718652	positive	856
Cla97C02G032280	Cla97C02G032280.1	0.35541	-0.0630586	0.240123	-0.141485	-0.0615327	-0.0768644	0.0271855	0.140234	0.0228768	-0.23987	-0.0615327	-0.141485	-0.328669	-0.252545	-0.31427	-0.322833	-0.241064	-0.28164	0.196486	0.14879	0.158204	0.402865	0.403668	0.431008	-0.414368	negative	858
Cla97C02G032330	Cla97C02G032330.1	0.00984129	-0.102903	-0.0936751	-0.0753936	-0.0277461	-0.0262822	-0.121539	-0.0380353	-0.035088	0.224261	0.153687	0.132873	0.284985	0.307382	0.365571	-0.323692	-0.248206	-0.253695	0.000575741	-0.086761	-0.044368	0.0132502	-0.0241014	0.0090603	-0.0726667	negative	859
Cla97C02G032350	Cla97C02G032350.1	-0.968794	-0.799865	-0.832105	0.0563747	0.0297122	0.0940375	0.590047	0.479462	0.472879	0.277718	0.358501	0.242032	-1.75819	-1.63299	-1.7534	0.00232461	0.005571	-0.0474092	0.795469	0.743552	0.784403	1.00351	0.906612	0.950559	0.970617	positive	860
Cla97C02G032410	Cla97C02G032410.1	0.226877	0.119379	0.120739	-0.566335	-0.568526	-0.479258	0.0695305	0.0149743	0.0525241	0.267976	0.410493	0.331625	0.142273	0.259075	0.138475	-0.0814264	0.0418958	-0.0623659	0.0213559	-0.0847281	0.0827553	-0.125177	-0.142876	-0.189256	-0.0352343	negative	862
Cla97C02G032430	Cla97C02G032430.1	-0.632286	-0.94007	-1.003	0.334162	0.391211	0.343828	0.370081	0.390046	0.394703	0.0946957	0.0975553	0.159075	-2.75029	-2.78711	-2.8384	0.733574	0.641875	0.699461	0.962685	0.950927	0.950625	1.13981	1.15132	1.14552	0.946774	positive	863
Cla97C02G032440	Cla97C02G032440.1	-0.171747	-0.47118	-0.36557	0.0649428	0.107682	0.0466361	0.0844015	0.0677388	-0.0900174	0.0621415	0.276701	0.38827	-0.59357	-0.475581	-0.406672	0.205951	0.275793	0.224664	0.0560123	0.0781142	0.0725516	0.17963	0.141333	0.241774	0.820217	positive	864
Cla97C02G032550	Cla97C02G032550.1	0.641468	0.684151	0.612979	-0.540852	-0.467309	-0.314871	-0.513673	-0.908657	-0.664929	0.443054	0.578665	0.449974	0.428552	0.387583	0.273039	0.00522938	-0.0382913	-0.0686724	-0.209548	-0.230692	-0.254718	-0.121565	-0.0174516	-0.153465	0.688581	positive	866
Cla97C02G032560	Cla97C02G032560.1	-1.24733	-0.883921	-1.28154	0.202511	0.251191	0.199758	0.609619	0.608581	0.603382	0.347621	0.295706	0.294417	-3.95391	-3.7463	-4.0057	0.992692	0.95929	0.985242	1.39578	1.4303	1.42682	1.57167	1.45277	1.49134	0.977826	positive	867
Cla97C02G032580	Cla97C02G032580.1	-0.222355	-0.252956	-0.12591	0.697068	0.598675	0.649197	0.269419	0.14929	0.216529	-0.731848	-0.535405	-0.711705	-0.345127	-0.257034	-0.440355	0.960276	0.769316	0.860955	0.34376	0.246504	0.285583	-0.847356	-0.765177	-0.811346	0.987678	positive	868
Cla97C02G032640	Cla97C02G032640.1	0.734612	0.786785	0.694676	-0.0457465	-0.0363376	-0.0457465	-0.113385	-0.224746	-0.119996	-0.542229	-0.65051	-0.437376	0.582618	0.552757	0.51292	-0.153984	-0.177706	-0.10177	-0.100619	-0.122824	-0.10324	-0.343393	-0.294629	-0.25013	0.968611	positive	869
Cla97C02G032700	Cla97C02G032700.1	-0.153019	-0.103678	-0.162767	-0.106811	-0.185772	-0.0850218	-0.0865673	-0.0850218	0.0134837	0.34232	0.360582	0.252271	0.313564	0.435848	0.362967	-0.183266	-0.167574	-0.205772	-0.225114	-0.276748	-0.232514	0.0223145	0.0768811	0.0794143	0.0199871	positive	872
Cla97C02G032710	Cla97C02G032710.1	0.101415	0.192921	0.17764	-0.119853	-0.19908	-0.134083	-0.268888	-0.251548	-0.202408	0.203018	0.275383	0.225483	0.168972	0.0522327	0.173178	0.00695045	0.0393257	0.0244297	0.00473637	0.0190884	-0.0133381	-0.119617	-0.207413	-0.148545	-0.27097	negative	873
Cla97C02G032780	Cla97C02G032780.1	0.0203794	-0.0910093	-0.00818979	-0.378373	-0.358877	-0.301921	-0.358877	-0.390198	-0.343467	0.768025	0.753767	0.688741	-0.102297	-0.00297188	0.0646749	-0.364616	-0.354948	-0.372692	0.0797725	0.0323674	0.0375709	0.374309	0.314114	0.294716	0.782635	positive	874
Cla97C02G032850	Cla97C02G032850.1	0.247154	0.374704	0.151942	0.0624538	0.00911855	0.0748022	-0.116282	-0.160628	-0.181689	-0.0522198	-0.323933	-0.0854214	0.604434	0.5375	0.564679	-0.162855	-0.1874	-0.218168	-0.212207	-0.244683	-0.215163	-0.13794	-0.163608	-0.16459	0.789368	positive	875
Cla97C02G032910	Cla97C02G032910.1	0.629275	0.777257	0.624487	-0.163573	-0.122747	-0.130821	-0.117925	-0.320923	-0.248864	-0.233135	-0.428265	-0.264766	0.156158	0.240301	0.263261	-0.261952	-0.128381	-0.236984	0.133663	0.0649008	0.10684	0.00700221	-0.155343	-0.189466	0.683396	positive	877
Cla97C02G032950	Cla97C02G032950.1	0.417754	0.326873	0.353928	0.065974	0.119051	0.144875	0.0299588	0.16494	-0.00249584	-0.679077	-0.582246	-0.359535	0.676202	0.766452	0.654871	0.241929	0.293451	0.257694	-0.148159	-0.445066	-0.288242	-0.620712	-0.791795	-0.596625	0.862948	positive	878
Cla97C02G032970	Cla97C02G032970.1	-0.397686	-0.427149	-0.387996	-0.00518292	0.011019	-0.0215689	0.291041	0.304249	0.238216	0.150518	0.110066	0.134473	-0.489285	-0.480349	-0.468863	0.0356264	-0.0182635	0.0176466	0.119472	0.060461	0.0421858	0.402404	0.38671	0.392255	0.835704	positive	879
Cla97C02G033000	Cla97C02G033000.1	0.0519741	0.16187	0.147605	0.0281041	-0.0400217	0.0224298	0.0589202	0.0281041	-0.000493332	-0.183474	-0.144655	-0.130363	0.0679407	0.148445	0.216997	-0.317275	-0.272495	-0.361658	-0.076181	-0.0427394	0.0251513	0.210905	0.208183	0.192727	-0.179235	negative	880
Cla97C02G033030	Cla97C02G033030.1	0.291165	0.369231	0.323134	0.0206886	-0.00996159	-0.0129149	-0.0564316	-0.0307629	-0.0763735	-0.258904	-0.305216	-0.253654	0.35941	0.334887	0.293389	-0.245865	-0.250878	-0.307193	-0.0473821	-0.0934013	-0.0836291	0.000288475	0.0126235	0.0277493	0.578703	positive	881
Cla97C02G033110	Cla97C02G033110.1	-1.09461	-0.820244	-0.880594	0.143023	0.134732	0.133345	0.367186	0.346992	0.39869	0.434032	0.427259	0.410185	-4.88877	-5.03557	-4.77586	1.5156	1.47637	1.55327	1.76585	1.7813	1.7489	1.60142	1.65213	1.60535	0.977671	positive	882
Cla97C02G033140	Cla97C02G033140.1	1.09102	1.19811	1.0918	-0.40852	-0.470964	-0.536235	-0.391164	-0.572455	-0.199597	-0.281171	-0.315547	-0.205274	5.96984	5.87516	5.87537	-1.01842	-0.989575	-0.980396	-2.37195	-2.46638	-2.34791	-2.5288	-2.5288	-2.48814	0.954797	positive	883
Cla97C02G033150	Cla97C02G033150.1	-0.00238648	-0.00387456	-0.129812	0.416735	0.311787	0.34373	0.177748	0.206343	0.16853	-0.615888	-0.42239	-0.450522	0.964582	0.976711	0.937978	-0.196671	-0.198727	-0.21194	-0.445095	-0.503947	-0.395609	-0.256133	-0.334593	-0.336555	-0.065543	negative	884
Cla97C02G033170	Cla97C02G033170.1	0.192257	0.201326	0.336832	-0.0171968	0.0154918	0.159392	-0.14601	-0.232344	0.0301089	0.112086	-0.10072	-0.551222	0.252776	0.259092	0.236719	0.0289272	0.0403504	0.0422737	-0.0282377	-0.0613575	-0.0355334	-0.241896	-0.24594	-0.247174	0.700286	positive	885
Cla97C02G033220	Cla97C02G033220.1	-0.168455	-0.186357	-0.10982	0.143085	0.0994235	0.140476	0.129993	0.095388	0.119433	-0.141218	-0.0549696	-0.0669796	-0.874664	-0.860728	-0.865926	0.248387	0.162243	0.143896	0.283191	0.237932	0.292535	0.463301	0.376067	0.393766	0.590674	positive	886
Cla97C02G033230	Cla97C02G033230.1	0.0882147	0.0772436	0.188479	0.0466356	-0.00198306	0.0268142	0.124638	0.148419	0.0239602	-0.250547	-0.238503	-0.233372	0.194204	0.335919	0.411164	0.452063	0.516896	0.520833	0.154176	-0.00493038	-0.100744	-0.752371	-0.859549	-0.867663	0.83949	positive	887
Cla97C02G033240	Cla97C02G033240.1	0.343857	0.0694397	0.270282	-0.165602	-0.12021	-0.193875	-0.121807	-0.0230169	-0.0762028	-0.0684837	0.160273	-0.0746557	0.466635	0.451904	0.509639	-0.0819704	-0.204957	-0.0855541	-0.119811	-0.122012	-0.142066	-0.274688	-0.208104	-0.189015	0.7364	positive	888
Cla97C02G033270	Cla97C02G033270.1	0.352875	0.347129	0.469587	0.0921323	0.0246255	-0.0829544	-0.222942	-0.0613983	-0.119083	-0.307417	-0.298383	-0.194172	0.915067	1.0463	0.924416	-0.516102	-0.678192	-0.464905	-0.467956	-0.345745	-0.744315	0.135784	0.152343	0.0433016	0.639891	positive	889
Cla97C02G033280	Cla97C02G033280.1	0.239783	0.269403	0.264508	-0.499679	-0.464715	-0.554847	0.143094	0.117536	0.255903	0.124306	0.0956554	0.00905353	0.236137	0.322816	0.312654	-0.27395	-0.181175	-0.13322	-0.103506	-0.229568	-0.166656	0.12818	0.0437647	0.0445236	0.620476	positive	890
Cla97C02G033300	Cla97C02G033300.1	-0.657565	-0.464028	-0.643351	-0.219501	-0.0998394	0.100669	-0.112837	0.203859	0.314794	0.821214	0.460108	0.296477	-1.98232	-1.78888	-2.12043	-1.22285	-0.943704	-1.05686	0.35016	0.527373	0.420446	2.57558	2.66706	2.57443	0.893095	positive	891
Cla97C02G033330	Cla97C02G033330.1	-0.723439	-1.42875	-0.50253	0.644455	0.848491	0.503026	0.433745	0.398412	0.357293	-0.25554	-0.207569	-0.0675926	-2.59718	-2.35414	-2.53343	2.20093	2.19618	2.16948	0.631742	0.546456	0.676099	-0.348701	-0.276443	-0.310991	0.916425	positive	892
Cla97C02G033340	Cla97C02G033340.1	0.545651	0.569061	0.494475	0.124444	0.178383	0.121693	-0.128731	-0.122196	-0.0245089	-0.589801	-0.642603	-0.525867	1.83159	1.87042	1.75981	-0.746341	-0.825669	-0.764119	-0.596365	-0.689365	-0.600131	-0.445287	-0.359647	-0.434899	0.674264	positive	893
Cla97C02G033370	Cla97C02G033370.1	-0.49515	-0.908735	-0.926258	-0.115968	0.0335195	-0.131128	0.637988	0.771693	0.763519	0.135571	0.032008	0.202941	-1.99041	-2.01316	-1.95821	-0.2588	-0.349757	-0.288665	1.40316	1.50536	1.41701	0.732566	0.911431	0.889475	0.945265	positive	894
Cla97C02G033390	Cla97C02G033390.1	-0.797187	-0.873808	-0.71853	-0.675028	-0.736305	-0.589079	0.0313326	0.00839016	0.0521912	1.43561	1.44746	1.41495	-5.08626	-5.04104	-5.08626	-2.29897	-1.95334	-1.98907	2.74401	2.89316	2.86089	4.32607	4.32328	4.30752	0.876334	positive	896
Cla97C02G033670	Cla97C02G033670.1	0.329062	0.435805	0.374113	0.415533	0.477689	0.400712	-0.122563	-0.106187	-0.139127	-0.544204	-0.943154	-0.577678	-0.52134	-0.331353	-0.497389	1.2501	1.41646	1.26905	-0.222503	-0.234337	-0.207633	-0.774691	-0.606799	-0.539568	0.601888	positive	898
Cla97C02G033760	Cla97C02G033760.1	0.0303637	0.199347	-0.0554238	0.097927	0.0161778	-0.0126194	0.12462	-0.0301778	0.0472047	-0.296159	-0.153035	0.0317747	-0.971071	-1.02723	-1.00613	0.296188	0.23991	0.256649	0.37244	0.331686	0.355765	0.384283	0.390737	0.376773	-0.297994	negative	899
Cla97C02G033770	Cla97C02G033770.1	0.560007	0.672507	0.734221	-0.087861	-0.0208918	0.0518147	-0.0532095	-0.26939	-0.214407	-0.51303	-0.335988	-0.523773	0.647249	0.640433	0.599541	-0.143643	-0.173854	-0.222835	-0.279809	-0.35615	-0.216358	-0.169795	-0.21267	-0.112109	0.874818	positive	900
Cla97C02G033790	Cla97C02G033790.1	-0.0439101	-0.157089	-0.129171	0.376102	0.396582	0.396582	-0.0256286	0.00433499	-0.0954125	-0.237212	-0.260183	-0.224993	-0.485024	-0.483854	-0.47012	0.409561	0.401923	0.394711	0.132773	0.139087	0.163815	-0.0528972	-0.0825239	-0.0674512	0.71164	positive	901
Cla97C02G033850	Cla97C02G033850.1	0.132144	0.0804684	0.165159	0.0721371	0.107897	0.0340393	0.0368961	0.121418	0.0651574	-0.245967	-0.284675	-0.284675	0.311804	0.311559	0.364064	0.146269	0.234707	0.141758	-0.124652	-0.123235	-0.152353	-0.345002	-0.363085	-0.401834	0.835373	positive	902
Cla97C02G033860	Cla97C02G033860.1	0.116145	0.0463564	0.182712	0.0837233	0.0379196	-0.00211813	0.0265932	0.105418	0.114808	-0.297113	-0.1262	-0.288246	0.112744	0.0801006	0.103368	0.12808	0.152888	0.12776	0.0171415	-0.0042438	0.0140585	-0.238098	-0.238502	-0.255296	0.852453	positive	903
Cla97C02G034010	Cla97C02G034010.1	-1.44287	-1.2049	-0.981447	0.216166	0.217554	0.195186	0.69204	0.763142	0.655642	0.283974	0.332177	0.273337	-6.84962	-6.79468	-6.87343	4.0663	4.09469	4.13174	3.33173	3.36047	3.36668	-0.588596	-0.635687	-0.609588	0.893888	positive	905
Cla97C02G034140	Cla97C02G034140.1	0.134477	0.118781	0.110868	-0.16839	-0.0872654	-0.212383	-0.184527	-0.271483	-0.433672	0.243435	0.290896	0.459264	0.644403	0.781191	0.751577	-0.602152	-0.497892	-0.597348	-0.294814	-0.301373	-0.27091	0.14167	0.0913835	0.154264	0.617437	positive	906
Cla97C02G034150	Cla97C02G034150.1	0.89336	1.20289	1.05757	-0.149893	-0.496676	-0.445186	-0.164302	-0.349467	-0.133853	-0.451799	-0.550073	-0.412569	1.36083	1.39428	1.28103	-0.768772	-0.718996	-0.712653	-0.4431	-0.425124	-0.455501	-0.199347	-0.162817	-0.14983	0.925332	positive	907
Cla97C02G034220	Cla97C02G034220.1	-0.225318	-0.199693	-0.368348	0.0183391	0.0328241	0.0342646	0.183241	0.12359	0.116807	0.0712224	0.096265	0.116807	0.19316	0.20995	0.288442	-0.0123827	0.0674166	0.0210598	-0.0909892	-0.124808	-0.0926791	-0.148966	-0.126881	-0.183322	-0.933355	negative	909
Cla97C02G034280	Cla97C02G034280.1	0.150954	0.110015	0.0651181	-0.0100466	-0.103253	-0.0862709	0.0386203	0.0568028	0.0512326	-0.188001	-0.063431	-0.0217403	-0.238402	-0.233142	-0.206101	-0.0125918	0.0584502	0.0456082	0.138138	0.0989234	0.202738	0.0565768	0.014039	0.0757636	-0.486082	negative	912
Cla97C02G034370	Cla97C02G034370.1	0.39025	0.384677	0.207897	-0.229614	-0.276521	-0.24681	-0.252008	-0.224495	-0.0788079	0.0674871	0.165631	0.0923142	0.683648	0.656148	0.718149	-0.418847	-0.431028	-0.465761	-0.325386	-0.503489	-0.464199	0.212044	0.131111	0.207609	0.943959	positive	913
Cla97C02G034380	Cla97C02G034380.1	0.272776	0.164289	0.179746	-0.0853397	0.0114219	-0.0339174	0.0581701	0.018603	-0.00596022	-0.154729	-0.231027	-0.194033	0.415055	0.521819	0.456452	-0.00813366	0.0111964	-0.0691769	-0.244665	-0.214657	-0.289802	-0.299933	-0.157835	-0.120319	0.740337	positive	914
Cla97C02G034490	Cla97C02G034490.1	1.14025	1.04965	0.966142	-0.202146	-0.200307	-0.180232	-0.369773	-0.183861	-0.135618	-0.769732	-0.617184	-0.497184	1.62239	1.68008	1.60158	-0.304348	-0.20462	-0.351205	-0.831933	-0.811899	-0.629711	-0.517499	-0.636927	-0.615915	0.949587	positive	916
Cla97C02G034550	Cla97C02G034550.1	0.0833722	-0.0272224	-0.0524944	-0.112201	-0.24986	-0.1876	0.0765315	-0.0140202	0.0888215	-0.00673756	0.2592	0.142211	-0.180085	-0.244986	-0.16203	0.165683	0.100336	0.0857845	0.0408847	0.0122051	0.004711	0.0170572	0.0534167	0.107022	-0.136371	negative	918
Cla97C02G034680	Cla97C02G034680.1	0.0682617	0.0185332	0.0271808	0.300001	0.174578	0.101397	0.0429012	0.0141899	0.0626645	-0.327814	-0.378309	-0.103585	-0.148481	-0.00112278	-0.0788295	0.006628	0.110398	0.000122654	-0.0790174	-0.210006	-0.0345807	0.164908	0.0748886	0.195093	-0.398338	negative	920
Cla97C02G034860	Cla97C02G034860.1	-0.0768727	-0.00509694	-0.0510418	0.267871	0.249647	0.231191	0.124561	-0.0753404	-0.021233	-0.342055	-0.158884	-0.142746	-0.60537	-0.649621	-0.662714	0.926787	0.880339	0.972024	0.130891	0.153669	0.120485	-0.457705	-0.410005	-0.39878	0.817415	positive	925
Cla97C02G035050	Cla97C02G035050.1	0.088122	-0.108616	-0.17573	-0.111742	-0.0340689	0.0578353	-0.177367	-0.0594981	0.0283198	0.193187	0.203285	0.0962728	-0.0780146	-0.0742886	-0.104259	-0.53577	-0.507897	-0.569994	-0.0574284	-0.0772309	0.00235231	0.687462	0.676226	0.638842	0.627152	positive	926
Cla97C02G035060	Cla97C02G035060.1	0.558546	0.231127	0.304252	-0.203208	-0.328432	-0.223624	-0.0601864	0.0572901	0.0615147	-0.380968	0.0810674	-0.0973793	-0.0692957	-0.0660166	-0.116144	0.00692403	0.129484	0.031086	-0.00307147	-0.0458732	0.00638998	0.071855	0.0391118	0.0155503	-0.828938	negative	927
Cla97C02G035130	Cla97C02G035130.1	0.0483572	0.127686	0.110746	-0.412372	-0.477059	-0.390099	-0.380087	-0.492076	-0.402205	0.754148	0.79006	0.722903	-0.486396	-0.469567	-0.527463	0.164564	0.112952	0.16634	0.158384	0.182842	0.179677	0.214694	0.169129	0.134844	-0.0942923	negative	928
Cla97C02G035240	Cla97C02G035240.1	-0.172521	-0.0210169	-0.0421446	-0.110635	-0.00759636	0.0675911	-0.179192	-0.172521	-0.25117	0.365654	0.302409	0.221143	0.501363	0.492447	0.518276	-0.153576	-0.178767	-0.273562	-0.241044	-0.265154	-0.204233	-0.0454754	-0.0592749	-0.0909991	-0.0479097	negative	929
Cla97C02G035300	Cla97C02G035300.1	-0.105484	-0.397952	-0.189329	0.228611	0.198475	0.267837	0.0432261	0.0586862	0.124275	-0.143577	0.122938	-0.207707	-1.07474	-1.03262	-1.16235	0.223418	0.139727	0.0975364	0.326247	0.240729	0.189998	0.680897	0.702717	0.668435	0.478608	positive	930
Cla97C02G035330	Cla97C02G035330.1	-0.187558	-0.215863	0.341942	-0.0553102	-0.24817	0.114782	0.240201	0.308429	-0.0583221	0.167297	0.0999987	-0.507427	-2.08419	-2.21131	-1.99035	-0.0342841	0.0990027	-0.0364607	0.998863	1.03949	1.03415	1.07672	1.00051	1.10785	0.09997	positive	933
Cla97C02G035370	Cla97C02G035370.1	0.248221	0.170287	0.254327	0.146849	0.0810471	0.0741607	-0.239165	-0.149383	-0.247767	-0.172128	-0.0801452	-0.086304	0.998173	1.08219	0.886764	0.0920905	0.106628	0.088458	-0.398725	-0.347238	-0.336659	-0.698269	-0.730022	-0.743389	0.853383	positive	934
Cla97C02G035580	Cla97C02G035580.1	-0.192891	-0.247404	-0.113218	0.262126	0.240006	0.227569	0.136041	0.154554	0.118635	-0.187885	-0.204641	-0.192891	0.711663	0.646722	0.668079	-0.0132372	0.0134972	-0.094137	-0.326327	-0.38242	-0.252069	-0.310767	-0.312054	-0.348951	-0.351671	negative	937
Cla97C02G035680	Cla97C02G035680.1	-0.314065	-0.421121	-0.315908	-0.094043	-0.142298	-0.127651	-0.0830119	-0.117969	-0.0290875	0.462161	0.650496	0.532499	-0.0924246	-0.0670319	-0.0346632	-0.102201	-0.070267	-0.148125	-0.0438975	-0.105021	-0.0976329	0.268665	0.225938	0.266661	0.890692	positive	939
Cla97C02G035700	Cla97C02G035700.1	0.163899	0.195872	0.140816	-0.297217	-0.269667	-0.203876	-0.417028	-0.466215	-0.406988	0.524372	0.529609	0.506424	-0.214245	-0.168321	-0.189157	-0.310122	-0.297753	-0.295604	0.0884003	0.0928871	0.0710335	0.434304	0.388934	0.399644	0.543666	positive	940
Cla97C02G035710	Cla97C02G035710.1	-0.180268	-0.0659351	-0.333557	-0.0252931	-0.407074	0.0555189	0.0611216	0.0214379	0.115984	0.184321	0.399728	0.174016	-0.359833	-0.281861	-0.41554	-0.204921	-0.10509	-0.182694	0.151703	0.118347	0.0830872	0.366777	0.368948	0.461077	0.772972	positive	941
Cla97C02G035780	Cla97C02G035780.1	0.137229	0.48296	0.636117	0.151822	0.106231	0.199851	0.0814987	-0.0796183	-0.245288	-0.110948	-0.414779	-0.945076	0.596639	0.596468	0.621983	-0.05492	0.0129348	-0.111165	-0.260386	-0.365373	-0.239712	-0.24326	-0.284521	-0.268688	0.695974	positive	943
Cla97C02G035850	Cla97C02G035850.1	0.471819	0.568653	0.515891	-0.0732116	-0.0778831	-0.0608279	-0.0810058	-0.0485496	-0.115809	-0.301836	-0.445363	-0.351877	0.101031	0.0609772	0.0958204	-0.277906	-0.342386	-0.288222	0.0641199	-0.040811	-0.0541845	0.191527	0.262184	0.22785	-0.0721238	negative	944
Cla97C02G036050	Cla97C02G036050.1	-0.773203	-0.662077	-0.583449	-0.0465427	-0.0357243	-0.131197	0.319986	0.313958	0.262295	0.478233	0.388139	0.469581	-1.32952	-1.27934	-1.31712	0.252819	0.174228	0.281459	0.53159	0.468944	0.513799	0.592281	0.573094	0.537764	0.950434	positive	946
Cla97C02G036110	Cla97C02G036110.1	-0.390358	-0.304812	-0.208772	0.131287	0.139272	0.0755037	0.184993	0.16166	0.128615	0.0304158	0.0189202	0.0332755	-0.833982	-0.796969	-0.674679	-0.0261955	0.0199759	-0.05017	0.162847	0.172583	0.192322	0.637781	0.587469	0.609017	0.754826	positive	948
Cla97C02G036140	Cla97C02G036140.1	-0.249156	-0.363904	-0.289998	-0.0423552	0.0373231	0.00245261	0.217895	0.146492	0.153132	0.111467	0.15974	0.116911	-0.447503	-0.550894	-0.621349	-0.19148	-0.182632	-0.130079	0.252177	0.274129	0.214464	0.414181	0.501369	0.467616	0.915318	positive	949
Cla97C02G036160	Cla97C02G036160.1	-0.0609678	-0.0336605	0.0636694	0.0237898	0.0208986	-0.0427056	0.0678775	-0.0563806	-0.088802	-0.0502868	0.0914946	0.0650735	0.0357291	0.0478618	0.244196	0.002305	0.129678	0.00316472	-0.129504	-0.135902	-0.169629	0.0354641	-0.0713978	0.00803237	0.256622	positive	951
Cla97C02G036200	Cla97C02G036200.1	-0.0794135	-0.00778617	0.0167525	0.0153205	0.0493012	-0.0702631	0.215646	0.100169	0.18158	-0.149956	-0.118177	-0.153172	-0.418888	-0.395416	-0.360067	0.261153	0.292151	0.334897	0.0899726	0.215283	0.140473	-0.0885978	-0.0390853	-0.0318748	0.313982	positive	953
Cla97C02G036270	Cla97C02G036270.1	-0.790429	-1.03414	-0.87671	-0.154157	-0.164624	-0.102932	0.35711	0.38728	0.326295	0.667529	0.689972	0.694805	-3.45478	-3.4056	-3.37222	0.88931	0.933401	0.910373	1.25488	1.28624	1.31011	1.22626	1.1872	1.23483	0.893708	positive	954
Cla97C02G036370	Cla97C02G036370.1	-0.26588	-0.157965	-0.232992	0.0377233	0.216291	0.0490276	0.274032	0.170447	0.303828	-0.043988	-0.227867	-0.122658	-0.863588	-0.713612	-0.745072	-0.162181	-0.0400743	-0.0982552	0.359717	0.246524	0.20185	0.637402	0.581032	0.596258	0.38188	positive	956
Cla97C02G036410	Cla97C02G036410.1	0.205768	-0.0565128	0.0826327	-0.0120274	0.180435	-0.138621	-0.111772	0.0921734	0.0536258	-0.0823437	-0.227379	0.01402	0.322552	0.272419	0.458805	0.189108	0.140498	0.215171	-0.225793	-0.119142	-0.18947	-0.390756	-0.317547	-0.355845	0.435646	positive	957
Cla97C02G036460	Cla97C02G036460.1	0.0717088	-0.137399	-0.140595	0.0325255	0.324352	-0.0194691	0.116563	-0.227958	0.104468	-0.211064	0.00964784	0.0772205	-0.137757	-0.117339	-0.145137	0.0384731	-0.0908193	-0.0445901	0.052182	-0.0315917	0.0470979	0.14087	0.130293	0.158318	0.00657941	positive	958
Cla97C02G036480	Cla97C02G036480.1	0.512672	0.791388	0.73997	-0.0351469	-0.068533	-0.0977778	-0.0653199	-0.369703	-0.196259	-0.301958	-0.537647	-0.371686	1.41634	1.42971	1.53429	-0.273488	-0.245862	-0.274579	-0.356231	-0.42735	-0.464794	-0.745748	-0.774486	-0.817799	0.971274	positive	959
Cla97C02G036490	Cla97C02G036490.1	0.016107	0.0528476	0.059807	-0.0319145	-0.0408201	-0.0739523	-0.0438008	-0.0408201	-0.0304356	0.0203944	0.0458543	0.0667331	-0.194845	-0.2094	-0.242662	0.0414206	0.051247	0.0323301	0.202688	0.154224	0.147294	0.00412072	0.000114121	0.0134673	-0.680149	negative	960
Cla97C02G036610	Cla97C02G036610.1	-0.118473	-0.171525	-0.140743	0.0761434	0.0939632	0.0898704	0.0482913	0.0369982	0.0511009	-0.0149445	0.0511009	-0.00178245	-0.602307	-0.542334	-0.582187	0.349982	0.361966	0.359132	0.177151	0.19901	0.226907	0.0194668	-0.00633486	0.0395483	0.968274	positive	962
Cla97C02G036640	Cla97C02G036640.1	0.0211203	-0.0316671	0.0900005	0.337856	0.146531	0.282474	0.0748214	0.0196798	0.0453919	-0.475871	-0.0725651	-0.437771	-0.301217	-0.21847	-0.180229	-0.0674073	0.0219827	0.044624	0.0747792	0.0166029	0.0106569	0.210645	0.20702	0.181013	-0.471761	negative	963
Cla97C02G036720	Cla97C02G036720.1	-0.72118	-0.514562	-0.790197	0.553043	0.484356	0.589724	0.292484	0.234465	0.327896	-0.131234	-0.141218	-0.183578	-1.86458	-1.83645	-1.93729	1.24289	1.1944	1.19929	0.68975	0.638627	0.681331	0.026015	-0.0223789	-0.011591	0.973659	positive	965
Cla97C02G036790	Cla97C02G036790.1	-0.290819	-0.109727	-0.213283	0.0100678	0.00286514	0.0143722	0.169095	0.123333	0.174234	0.0870111	-2.60366e-05	0.0328777	0.110948	0.079989	0.0741325	0.0528552	0.0441821	0.0503721	-0.00706851	-0.105303	-0.040593	-0.0737372	-0.102926	-0.0828508	-0.698088	negative	968
Cla97C02G036910	Cla97C02G036910.1	1.09294	1.03194	1.29683	-0.339561	-0.142788	-0.362478	-0.276869	-0.292789	-0.59682	-0.358284	-0.392182	-0.65994	2.60168	2.62629	2.58539	0.396266	0.277457	0.405633	-1.01586	-0.965547	-1.06645	-1.96825	-1.88693	-1.98968	0.905552	positive	972
Cla97C02G036970	Cla97C02G036970.1	0.349865	0.267266	0.324039	-0.0284136	-0.0208721	-0.0299267	-0.302378	-0.257374	-0.284207	0.0147885	-0.00739584	-0.0253923	0.651554	0.674424	0.594902	0.280847	0.29709	0.305272	-0.236612	-0.193774	-0.211515	-0.750086	-0.714442	-0.697661	0.587175	positive	973
Cla97C02G037080	Cla97C02G037080.1	0.362605	0.232438	0.281141	-0.138293	-0.119205	-0.131903	-0.0894904	-0.139895	-0.0377972	-0.167407	0.043503	-0.0956955	-0.126067	-0.149026	-0.229125	-0.139007	-0.209087	-0.107289	0.0134605	0.0311091	0.057465	0.352565	0.236475	0.268527	-0.419279	negative	976
Cla97C02G037100	Cla97C02G037100.1	-0.00931635	-0.0136992	-0.00349315	-0.0780291	-0.0856989	-0.0522525	0.0947828	0.1056	0.0715241	-0.00640181	-0.0136992	-0.00931635	-0.00799135	-0.0361498	-0.0161275	0.255436	0.273493	0.256341	0.0941165	0.065573	0.0699104	-0.366259	-0.308647	-0.279695	-0.17449	negative	977
Cla97C02G037240	Cla97C02G037240.1	0.0874045	0.320212	0.106604	-0.0607688	0.00502352	0.215464	0.12958	-0.198731	-0.108993	-0.210564	-0.136139	-0.149092	-0.302022	-0.233064	-0.318287	-0.0660432	-0.0634898	-0.0409172	-0.0154028	0.058628	0.0184634	0.299679	0.360572	0.301884	-0.725939	negative	979
Cla97C02G037260	Cla97C02G037260.1	0.394133	0.273935	0.29428	0.0260074	0.00437737	-0.067102	-0.0762912	-0.0368874	-0.0917378	-0.396684	-0.0610083	-0.263022	0.47745	0.579196	0.509258	-0.19263	-0.362665	-0.274335	-0.255835	-0.13589	-0.270302	0.0575683	-0.0602853	-0.07153	0.665423	positive	980
Cla97C02G037270	Cla97C02G037270.1	0.740742	0.698683	0.594833	-0.0822417	-0.106354	-0.00314891	-0.177798	-0.0966608	-0.0918384	-0.591133	-0.438449	-0.446635	4.33487	4.37187	4.26564	-1.18859	-1.12668	-1.21599	-1.42218	-1.53173	-1.68008	-1.69195	-1.50269	-1.61248	0.930059	positive	981
Cla97C02G037310	Cla97C02G037310.1	-0.307116	-0.308932	-0.157292	-0.214007	-0.168788	-0.0761939	0.158735	0.130875	0.0983625	0.356135	0.258971	0.22925	-0.277985	-0.216585	-0.294149	-0.503611	-0.635045	-0.505721	0.434367	0.38775	0.379339	0.396932	0.41384	0.420867	0.852444	positive	982
Cla97C02G037360	Cla97C02G037360.1	0.480764	0.485136	0.64606	0.371658	0.362182	0.249771	-0.092208	-0.138537	-0.0441671	-0.715953	-0.640197	-0.964508	0.419784	0.421699	0.486701	-0.230467	-0.159112	-0.260706	-0.146902	-0.165242	-0.174421	-0.0973513	-0.045725	-0.048259	0.437706	positive	983
Cla97C02G037400	Cla97C02G037400.1	0.129403	-0.00260912	0.334242	0.224188	0.053635	-0.0233464	-0.0905316	-0.134975	-0.0811837	-0.202626	-0.0203656	-0.185831	-0.0731885	-0.0995458	-0.141883	0.216625	0.201419	0.178806	0.0409294	-0.0255165	0.059952	-0.0326406	-0.171092	-0.153864	0.128444	positive	985
Cla97C02G037440	Cla97C02G037440.1	-0.189625	-0.127033	-0.143243	0.467036	0.511203	0.484021	-0.0334195	0.0868143	0.0387671	-0.430939	-0.485693	-0.177889	1.10532	1.08374	1.08741	0.880793	0.799002	0.887851	0.047974	0.0706605	0.0578512	-2.03053	-2.0306	-1.95948	0.626881	positive	987
Cla97C02G037460	Cla97C02G037460.1	-0.250491	-0.272105	-0.250491	-0.19267	-0.23449	-0.232723	-0.122281	-0.0196951	-0.0851418	0.56679	0.521444	0.571854	-0.801755	-0.887662	-0.81431	0.350834	0.305492	0.220554	0.892344	0.917844	0.94649	-0.378368	-0.403391	-0.348071	-0.14354	negative	988
Cla97C02G037510	Cla97C02G037510.1	-0.138799	0.203684	0.211318	-0.545236	-0.332368	-0.308522	0.344547	0.14511	0.31651	0.27462	0.0701299	-0.240994	-0.438995	-0.450934	-0.297	0.161877	0.213493	0.136223	0.0522221	0.0534823	0.114843	0.153332	0.129909	0.171548	-0.275602	negative	990
Cla97C02G037530	Cla97C02G037530.1	0.471863	0.585195	0.472934	-0.0912927	-0.0217332	0.162208	-0.169383	-0.282355	-0.0217332	-0.14124	-0.296891	-0.667571	0.450431	0.422646	0.409008	0.13596	0.136544	0.143199	-0.158035	-0.171006	-0.183753	-0.362281	-0.377197	-0.445515	0.911892	positive	991
Cla97C02G037730	Cla97C02G037730.1	0.270362	0.186975	0.155892	0.18184	0.18184	0.0443369	-0.0446295	-0.0222385	0.0485739	-0.448179	-0.344537	-0.210236	-0.491826	-0.636799	-0.57304	-0.24534	-0.325339	-0.216482	0.553278	0.364939	0.485409	0.323199	0.373076	0.388925	-0.722531	negative	995
Cla97C02G037760	Cla97C02G037760.1	-0.354387	-0.206857	-0.275056	0.0152853	-0.098815	-0.0618826	-0.317958	-0.231609	-0.340859	0.700852	0.531511	0.639776	-0.327684	-0.349431	-0.255841	-0.123022	0.0174649	-0.0767403	0.0336757	0.00453177	0.124121	0.325039	0.282536	0.345349	0.770349	positive	996
Cla97C02G037790	Cla97C02G037790.1	-0.128453	-0.133207	-0.115853	0.144565	0.16794	0.112798	-0.194814	-0.248816	-0.152379	0.1563	0.184589	0.207329	0.43978	0.398665	0.440018	-0.132938	-0.116229	-0.143494	-0.100026	-0.16839	-0.148113	-0.139598	-0.169921	-0.159755	-0.44057	negative	997
Cla97C02G037880	Cla97C02G037880.1	0.360356	0.720463	0.10058	-0.239248	0.291131	-0.216472	0.189848	-0.497698	0.137769	-0.190632	-0.812778	0.156681	-0.323568	-0.313954	-0.358246	0.0718899	0.0303796	0.0749514	0.221874	0.140192	0.145287	0.0472788	0.11969	0.144225	-0.527049	negative	998
Cla97C02G037980	Cla97C02G037980.1	0.0241986	-0.027358	0.0357287	0.0669694	-0.0808255	0.0457425	-0.00651373	-0.0454674	0.0528529	-0.0515547	0.0795572	-0.09333	-0.266523	-0.380628	-0.308447	0.748599	0.713378	0.770498	0.843007	0.760695	0.809188	-1.34043	-1.17783	-1.17151	0.189671	positive	1001
Cla97C02G038000	Cla97C02G038000.1	-0.0528549	-0.0710404	0.0711693	0.0711693	0.0333672	0.0876574	0.1294	0.169968	0.0133692	-0.147773	-0.117533	-0.186899	1.07654	1.14583	1.08993	-0.0695008	0.0636795	-0.0232936	-0.429384	-0.416471	-0.323838	-0.638803	-0.752284	-0.722417	0.13543	positive	1002
Cla97C02G038040	Cla97C02G038040.1	-0.11856	-0.185973	-0.172887	0.0443789	0.0359503	-0.0230021	0.122086	0.17166	0.0734972	0.0610898	-0.0186059	0.0103649	-0.349738	-0.356219	-0.325458	0.0641985	0.133627	0.0449217	0.0979823	0.0073526	0.0698224	0.207289	0.236278	0.169943	0.746516	positive	1003
Cla97C02G038140	Cla97C02G038140.1	0.442087	0.219331	0.485124	-0.00199989	0.262025	0.0375686	0.0548122	0.136719	-0.00944799	-0.431472	-0.670299	-0.524448	0.0651369	0.0202333	0.0421634	-0.124947	-0.0922854	-0.0853865	-0.0992771	-0.133444	-0.101162	0.185776	0.168957	0.154235	-0.551142	negative	1004
Cla97C02G038270	Cla97C02G038270.1	-0.653814	-0.563191	-0.511429	0.135052	0.0728269	0.100814	0.285294	0.340329	0.337979	0.143149	0.168495	0.144494	-1.754	-1.65295	-1.70457	0.565344	0.540139	0.564079	0.6525	0.601511	0.651941	0.482089	0.517498	0.536418	0.975174	positive	1006
Cla97C02G038280	Cla97C02G038280.1	0.251295	0.199009	0.302932	-0.117226	-0.0509012	-0.0968508	-0.000535064	0.0649239	-0.0493945	-0.201732	-0.15076	-0.15076	0.625934	0.595885	0.631418	0.00765449	-0.100699	-0.175551	-0.278231	-0.152002	-0.403412	-0.181967	-0.34533	-0.2237	0.863607	positive	1007
Cla97C02G038330	Cla97C02G038330.1	0.233796	0.270322	0.142165	-0.0636793	0.0513316	0.0273449	-0.105187	-0.210304	-0.0835157	-0.0636793	-0.130361	-0.0682328	0.310405	0.395275	0.296889	0.123032	0.0175742	0.151203	0.0187252	-0.0553338	-0.0541155	-0.394259	-0.414697	-0.394698	0.737603	positive	1008
Cla97C02G038340	Cla97C02G038340.1	0.0795583	0.0534143	0.0809213	0.00684898	0.0296139	0.0338426	0.0450589	0.0211191	0.0338426	-0.0910487	-0.0788224	-0.214349	-0.0652417	-0.0729488	-0.0635973	0.2979	0.333691	0.292471	0.0365591	0.00864887	0.0549595	-0.250531	-0.295756	-0.276155	0.559623	positive	1009
Cla97C02G038380	Cla97C02G038380.1	-0.0650133	0.253487	0.188392	-0.122157	-0.328982	-0.323386	-0.0220819	-0.0190637	-0.0190637	0.173958	0.143304	0.140607	0.388681	0.308411	0.4712	0.125229	0.124248	0.108	-0.314456	-0.289398	-0.237127	-0.21914	-0.225078	-0.240569	-0.0605862	negative	1010
Cla97C02G038440	Cla97C02G038440.1	0.230723	0.528722	0.421181	-0.0226008	-0.0300643	-0.156684	-0.0226008	-0.223565	-0.116405	-0.116405	-0.348629	-0.143672	-0.0814022	-0.0732728	-0.152818	-0.04954	0.0601792	-0.0343753	-0.0145985	-0.0634394	-0.00377198	0.13295	0.118884	0.161206	-0.648221	negative	1011
Cla97C02G038490	Cla97C02G038490.1	-0.111143	-0.170561	-0.270683	-0.114293	-0.131742	-0.134938	0.0037287	-0.0601375	-0.0708072	0.269666	0.368879	0.422031	-0.783218	-0.795875	-0.811219	0.0143238	0.040055	0.0642801	0.337246	0.28583	0.265906	0.447879	0.487044	0.447748	0.702693	positive	1013
Cla97C02G038500	Cla97C02G038500.1	1.13156	1.3994	1.31873	0.0628131	-0.0495288	-0.0162815	-0.330016	-0.6407	-0.455742	-0.491366	-1.01283	-0.916054	2.27379	2.29827	2.31582	-0.0710803	0.226725	0.0343621	-0.967855	-0.76539	-0.874495	-1.51427	-1.45757	-1.49831	0.978277	positive	1014
Cla97C02G038620	Cla97C02G038620.1	0.458787	0.54549	0.469514	0.0594545	0.0777971	0.102816	-0.0420096	-0.0450597	-0.065044	-0.627734	-0.632314	-0.301696	1.2702	1.32977	1.18466	0.508727	0.504295	0.544542	-0.488192	-0.490702	-0.331574	-1.39466	-1.30181	-1.33524	0.952007	positive	1015
Cla97C02G038720	Cla97C02G038720.1	0.664913	0.847754	0.844349	-0.175385	-0.284827	-0.129473	0.0363549	-0.301701	-0.30737	-0.423636	-0.303588	-0.467389	-0.0298313	-0.0895759	-0.120686	-0.0229538	-0.135689	-0.0745294	0.148019	0.0690481	0.118978	0.0431765	0.0447231	0.0493209	-0.499806	negative	1016
Cla97C02G038850	Cla97C02G038850.1	0.0809374	0.0642747	0.0656706	0.3301	0.242709	0.323113	-0.1123	-0.0309778	-0.00877065	-0.309914	-0.277694	-0.367149	-0.228235	-0.110609	-0.244197	0.158545	0.1398	0.0856549	0.00310542	-0.0609015	-0.0324437	0.122421	0.0433968	0.123462	-0.058815	negative	1018
Cla97C02G038970	Cla97C02G038970.1	-1.01375	-0.119702	-0.875965	0.70136	0.35213	0.850392	0.524357	0.35091	0.521106	-0.402833	-0.265517	-0.622484	-4.77684	-4.92576	-4.9271	1.88807	1.82746	1.83286	1.80682	1.80372	1.7812	1.22047	1.2198	1.24929	0.687976	positive	1019
Cla97C02G039000	Cla97C02G039000.1	0.164129	0.401407	0.0792008	0.000735323	-0.0229159	-0.105729	0.102615	-0.0853537	0.0196705	-0.17029	-0.328911	-0.0545586	1.00015	0.996028	0.906418	-0.396058	-0.599554	-0.554719	-0.396799	-0.47062	-0.545505	-0.00302745	0.0232314	0.0404549	0.547953	positive	1020
Cla97C02G039060	Cla97C02G039060.1	-0.303097	-0.374833	-0.271154	0.0626598	0.0188313	-0.0442554	0.0875106	0.0765186	0.147827	0.189235	0.236911	0.173846	0.46915	0.498094	0.466147	0.215771	0.271024	0.113292	-0.220643	-0.152168	-0.218963	-0.521038	-0.443454	-0.477212	-0.903663	negative	1022
Cla97C02G039100	Cla97C02G039100.1	0.204299	0.133711	0.229253	0.429528	0.37054	0.427259	0.284183	0.262716	0.290437	-0.84557	-0.762955	-1.0234	-0.265907	-0.221129	-0.178375	0.482678	0.540922	0.441702	-0.024994	0.00994073	0.111296	-0.303096	-0.30811	-0.284927	0.668128	positive	1023
Cla97C02G039110	Cla97C02G039110.1	-0.567503	-0.428594	-0.490082	0.0588375	0.110845	0.116357	-0.00256305	0.0167226	0.00933554	0.470651	0.344827	0.361168	0.193599	0.224193	0.215214	-0.0481206	0.0691613	0.0113093	-0.127726	-0.258528	-0.0734628	-0.0787316	-0.123791	-0.00311653	-0.698219	negative	1024
Cla97C02G039140	Cla97C02G039140.1	-0.381056	-0.342988	-0.324324	0.168765	0.197463	0.183185	0.325897	0.266807	0.249469	-0.128669	-0.136787	-0.0777634	-0.345652	-0.282531	-0.275833	0.376418	0.49662	0.432344	0.126087	0.108384	0.105511	-0.278767	-0.286133	-0.176447	0.826536	positive	1025
Cla97C02G039260	Cla97C02G039260.1	0.0770363	0.277949	0.0363943	-0.221249	-0.287312	-0.312434	-0.0606055	-0.325161	0.0948899	0.250029	0.277949	0.192513	0.322475	0.367351	0.262563	-0.402989	-0.417347	-0.455959	-0.0974354	-0.16808	-0.105537	0.23454	0.188867	0.271551	0.871485	positive	1028
Cla97C02G039300	Cla97C02G039300.1	0.744064	0.852416	0.712619	0.0854375	0.0547873	0.0429376	0.0384687	0.109781	-0.140811	-1.04285	-0.881724	-0.575123	-0.0242939	-0.0440069	-0.037149	-0.0872584	-0.0117292	-0.0350838	-0.0729759	0.0163393	-0.0500499	0.112117	0.097902	0.136188	-0.736519	negative	1029
Cla97C02G039320	Cla97C02G039320.1	0.429003	0.447563	0.402389	-0.237904	-0.20343	-0.255456	0.0982581	0.00108942	0.0703521	-0.257223	-0.20343	-0.291212	0.409811	0.461594	0.302627	-0.218011	-0.250375	-0.277849	-0.103726	-0.106822	-0.139408	-0.0541545	0.00105278	-0.0247391	0.844327	positive	1031
Cla97C02G039330	Cla97C02G039330.1	-0.212063	-0.342028	-0.210384	0.18353	0.102119	0.2151	-0.0774631	0.00431897	-0.185438	0.102119	0.208841	0.211348	-0.0678747	-0.0471601	-0.0998888	-0.192991	-0.224781	-0.254107	0.0195781	-0.017192	9.65227e-05	0.323628	0.256274	0.304417	0.202171	positive	1032
Cla97C02G039350	Cla97C02G039350.1	-0.0492914	-0.098357	-0.136283	0.0126743	-0.0106189	0.0398553	0.100901	0.102259	0.098182	0.00398335	-0.000381838	-0.0629233	0.0629009	-0.0301769	-0.108163	-0.102964	-0.0608054	-0.0442524	0.0206103	0.0280101	-0.045463	0.0746036	0.120527	0.085173	0.116094	positive	1033
Cla97C02G039380	Cla97C02G039380.1	0.213472	0.208437	0.180422	-0.0118556	0.0527856	0.0358292	0.0485652	0.0229798	0.021545	-0.259691	-0.266686	-0.245802	0.223422	0.274131	0.227461	-0.0555011	-0.115545	-0.224425	0.0458428	-0.0755349	-0.115181	-0.0392161	-0.114966	-0.0304874	0.589314	positive	1034
Cla97C02G039390	Cla97C02G039390.1	0.507277	0.663664	0.539327	-0.0359547	-0.256064	-0.154991	-0.101401	-0.234925	-0.146742	-0.336336	-0.234925	-0.20893	0.626423	0.706222	0.736651	-0.38455	-0.39138	-0.392735	-0.313288	-0.273815	-0.201131	-0.0869304	-0.0820643	0.0565967	0.889675	positive	1035
Cla97C02G039420	Cla97C02G039420.1	0.125949	0.0732357	0.275827	-0.146406	-0.0309289	-0.0413241	-0.0882821	0.0524372	-0.0487953	0.111275	-0.0760168	-0.206971	-0.0705235	-0.00165008	0.201683	-0.346285	-0.19835	-0.146664	0.0454024	-0.0680057	-0.086198	0.310739	0.156928	0.202924	0.309417	positive	1037
Cla97C02G039430	Cla97C02G039430.1	0.406855	0.202617	0.556087	-0.0189257	-0.0429212	-0.106296	-0.391945	-0.0565961	-0.289715	-0.00855187	-0.0189257	-0.231683	-0.216774	-0.0360697	-0.200231	0.0983235	0.0770818	0.0667337	0.00394209	-0.0777083	-0.18461	0.0990588	0.10206	0.268193	-0.511163	negative	1038
Cla97C02G039450	Cla97C02G039450.1	0.0774849	0.207712	0.175919	-0.295942	-0.248579	-0.217846	-0.11516	-0.214471	-0.0163589	0.288426	0.289615	0.0692015	-0.425084	-0.56077	-0.587841	-0.0520001	-0.0402091	-0.0599497	0.192322	0.112908	0.17857	0.394242	0.399792	0.44802	-0.00369763	negative	1040
Cla97C02G039470	Cla97C02G039470.1	-0.263533	-0.284698	-0.412815	0.034385	-0.0582497	0.120088	-0.00605351	-0.034154	-0.0476583	0.253315	0.36285	0.336524	-0.210847	-0.130632	-0.168478	-0.128239	-0.133042	-0.0843009	0.0374986	0.102265	0.0179634	0.233508	0.24475	0.219553	0.834336	positive	1041
Cla97C02G039480	Cla97C02G039480.1	-0.0539531	-0.128351	-0.0645668	-0.180171	-0.183472	-0.211843	0.147352	0.0965385	0.123506	0.0801129	0.204037	0.170811	-0.674786	-0.390979	-0.630519	-0.457914	-0.0633812	0.0625835	0.347474	0.335652	0.215187	0.536992	0.277902	0.44179	0.676266	positive	1042
Cla97C02G039520	Cla97C02G039520.1	0.937777	0.857064	0.955842	-0.234008	-0.324266	-0.10414	0.0853114	-0.109253	0.0505824	-0.832061	-0.232148	-1.0507	0.34175	0.215883	0.317665	0.0614415	0.0896617	0.0997258	-0.15397	-0.0434256	-0.0970707	-0.282693	-0.243879	-0.305089	0.851515	positive	1043
Cla97C02G039570	Cla97C02G039570.1	0.108297	0.210329	0.124268	0.0840043	0.0355639	0.0744454	0.140064	0.0199977	0.0826426	-0.25676	-0.286364	-0.336488	-0.551922	-0.51157	-0.595705	-0.0206829	-0.0321733	-0.0738833	0.252968	0.205912	0.299402	0.396396	0.28351	0.347749	-0.652581	negative	1044
Cla97C02G039780	Cla97C02G039780.1	-1.09738	-0.998067	-0.60251	0.0203901	0.0758564	0.043134	0.477597	0.264452	0.360542	0.509524	0.540759	0.405704	-1.40626	-1.40764	-1.41025	0.344921	0.194506	0.247772	0.485048	0.49509	0.413199	0.64079	0.757031	0.645793	0.966262	positive	1047
Cla97C02G039790	Cla97C02G039790.1	0.352358	0.390923	0.265901	0.0645108	0.0602944	0.0729067	0.00579249	-0.0372319	0.00725345	-0.403895	-0.388445	-0.390367	-0.122808	-0.134597	-0.104384	0.0972681	0.141357	-0.00770029	-0.0212038	-0.0784473	0.0609309	0.0413218	0.0681421	0.0601203	-0.619532	negative	1048
Cla97C02G039830	Cla97C02G039830.1	-0.597274	-0.877382	-0.392353	0.128178	0.133716	0.0987482	0.51838	0.351363	0.471039	0.00365532	0.144729	0.0172018	0.14267	0.139065	0.195374	0.0608125	0.0623599	0.128815	-0.0505799	-0.0111321	-0.00372182	-0.217929	-0.230581	-0.215153	-0.462429	negative	1049
Cla97C02G039920	Cla97C02G039920.1	-0.0148349	-0.189587	0.114152	-0.037249	-0.0769447	-0.0327382	-0.361815	0.0404364	-0.187914	0.378541	0.154266	0.213687	-0.00134925	0.111469	0.0419951	0.160704	0.211879	0.176964	-0.0715848	-0.107828	-0.105733	-0.0928897	-0.238662	-0.0849637	-0.302037	negative	1051
Cla97C02G040030	Cla97C02G040030.1	0.312651	0.109437	-0.265308	0.0418734	-0.0171968	0.255365	-0.0911199	-0.0665628	0.0959028	-0.288195	0.0104782	-0.0973251	0.92162	0.907554	0.972014	0.0818178	0.00584004	-0.116979	-0.462758	-0.438856	-0.380094	-0.572935	-0.377799	-0.539424	0.294018	positive	1052
Cla97C02G040040	Cla97C02G040040.1	0.11001	0.0898135	0.067954	-0.0451161	-0.0951043	-0.105934	0.037346	0.0175246	0.0302982	-0.054077	-0.0630939	0.010379	0.151977	0.120712	0.173627	-0.0190893	-0.0506072	0.0365682	0.00216676	0.115944	0.0433479	-0.212571	-0.206599	-0.155476	0.634647	positive	1053
Cla97C02G040070	Cla97C02G040070.1	-0.0941492	-0.0529483	-0.111278	0.186323	0.109099	0.197748	0.00889096	-0.00559405	-0.0514447	-0.0895127	-0.0988005	0.00166664	0.282992	0.308934	0.377109	0.946729	0.939785	0.927958	-0.235631	-0.262798	-0.229588	-0.994271	-1.06865	-0.992572	0.64437	positive	1055
Cla97C02G040090	Cla97C02G040090.1	0.132288	-0.0089502	0.0931297	0.22889	0.216378	0.154758	0.0528788	0.035889	0.0287505	-0.38438	-0.337505	-0.212127	-0.00815711	-0.0163746	-0.0518145	-0.26358	-0.188742	-0.187417	-0.181609	-0.135283	-0.180886	0.438264	0.390101	0.385497	-0.932886	negative	1056
Cla97C02G040110	Cla97C02G040110.1	0.386991	0.411673	0.341005	0.109629	0.0579738	0.206419	-0.0791034	-0.154503	-0.206483	-0.419515	-0.263954	-0.390131	0.547969	0.501208	0.596847	0.0491888	0.0489934	0.0414499	-0.29853	-0.176164	-0.227241	-0.389101	-0.360702	-0.333918	0.942238	positive	1057
Cla97C02G040160	Cla97C02G040160.1	-0.130177	-0.663904	0.18564	-0.0735314	-0.101576	-0.247126	0.180474	0.247471	0.151724	0.0938197	0.394153	-0.0369669	-0.147144	-0.139658	-0.218601	-0.301872	-0.19912	-0.196813	0.0733405	-0.054294	-0.00411411	0.315871	0.455789	0.416615	0.445418	positive	1058
Cla97C02G040200	Cla97C02G040200.1	-0.0536424	-0.0916703	0.118782	0.0823591	0.0519854	-0.0476499	-0.1774	0.146489	-0.00348233	0.142564	-0.107167	-0.0611682	-0.230805	-0.259992	-0.28237	-0.0606197	-0.0842643	-0.0892834	0.0543719	0.0124026	-0.00701028	0.281653	0.328743	0.337174	-0.101178	negative	1059
Cla97C02G040220	Cla97C02G040220.1	-0.246808	-0.278232	-0.110801	-0.246808	-0.29515	-0.235878	-0.230444	-0.442329	-0.38486	0.774068	0.955064	0.742179	-0.245458	-0.21551	-0.274754	-0.0561888	-0.0741183	-0.04227	-0.00996562	0.0244539	0.0724722	0.288934	0.307622	0.224783	0.770381	positive	1060
Cla97C02G040240	Cla97C02G040240.1	0.00491231	-0.0125575	-0.0125575	0.0392298	0.00780349	0.0588777	0.0349845	0.0546899	0.0616628	-0.0861727	-0.0693168	-0.081556	0.315076	0.307393	0.321918	0.20603	0.217713	0.183012	-0.187827	-0.249132	-0.22503	-0.277911	-0.32791	-0.283334	0.304145	positive	1061
Cla97C02G040280	Cla97C02G040280.1	0.0283719	0.0737702	-0.0980764	0.205804	0.0945686	0.257133	0.143295	0.127235	0.204529	-0.39196	-0.313146	-0.331524	-0.126709	-0.187283	-0.04707	-0.269849	-0.089712	-0.170891	0.147701	-0.031391	0.146048	0.246429	0.184878	0.197848	-0.663798	negative	1063
Cla97C02G040330	Cla97C02G040330.1	0.344381	0.550521	0.51262	-0.0243672	-0.070268	-0.016857	0.139185	-0.084328	-0.0594265	-0.414521	-0.424423	-0.452516	-0.142348	-0.116499	-0.0512192	-0.425235	-0.299522	-0.321676	0.0235947	0.072353	0.173198	0.338922	0.362245	0.386187	-0.564024	negative	1064
Cla97C02G040350	Cla97C02G040350.1	0.0978411	0.0813215	-0.10619	-0.368279	-0.342047	-0.274933	0.0937289	0.167318	0.154214	0.20084	0.12496	0.171226	-0.945336	-0.791304	-0.897612	-0.313168	-0.332421	-0.298678	0.482218	0.53701	0.516861	0.693108	0.654804	0.694519	0.518256	positive	1065
Cla97C02G040430	Cla97C02G040430.1	0.356833	0.148785	0.239144	0.272538	0.156756	0.194672	-0.0601274	0.0538093	0.019252	-0.62142	-0.264921	-0.495321	-0.0295903	-0.010392	0.0158166	0.24432	0.303845	0.244769	-0.00454739	-0.019856	-0.0444774	-0.281234	-0.254567	-0.164087	0.745636	positive	1067
Cla97C02G040530	Cla97C02G040530.1	0.0570783	0.0347322	0.171596	-0.0344613	-0.0522909	0.0543039	0.0584635	0.133986	0.0248458	-0.21012	-0.144902	-0.0932319	0.321008	0.493726	0.472843	0.315575	0.522162	0.289887	-0.168048	-0.175813	0.0646473	-0.609103	-0.688116	-0.838768	0.613498	positive	1068
Cla97C02G040580	Cla97C02G040580.1	0.237662	0.224081	0.0930136	-0.0288171	0.0047864	-0.0155746	0.0418537	0.034799	0.034799	-0.226539	-0.27656	-0.123504	0.431937	0.498251	0.431136	-0.484501	-0.295263	-0.339299	-0.0614953	-0.236123	-0.24205	0.167178	0.123593	0.00663619	0.317744	positive	1070
Cla97C02G040590	Cla97C02G040590.1	-0.0676609	0.00649181	-0.0182949	-0.0585587	-0.1172	0.0180104	-0.125097	0.0379492	-0.0212391	0.180587	-0.00657748	0.17159	0.0724376	0.0449582	0.0422611	-0.0697006	-0.00608627	-0.0286151	-0.0664577	0.0142839	-0.0278086	0.00174885	0.0110146	0.011964	0.232979	positive	1071
Cla97C02G040760	Cla97C02G040760.1	0.280906	0.308849	0.363163	-0.331927	-0.32631	-0.235772	-0.55026	-0.399131	-0.339451	0.508546	0.422196	0.299191	0.859305	0.81115	0.733077	-0.740202	-0.657218	-0.6556	-0.473708	-0.564121	-0.50312	0.387487	0.456033	0.346917	0.905213	positive	1074
Cla97C02G040780	Cla97C02G040780.1	0.12251	0.130488	0.257344	-0.0712788	-0.0247605	0.00447448	0.19531	0.0345466	0.0819438	-0.254803	-0.0943379	-0.381436	-0.445625	-0.546236	-0.574993	-0.182535	-0.0936175	-0.0960817	0.28432	0.155858	0.255147	0.41911	0.433206	0.391448	-0.623439	negative	1075
Cla97C02G040810	Cla97C02G040810.1	1.08425	1.08425	1.061	-0.112247	-0.0451324	-0.0350787	-0.678831	-0.658109	-0.705158	-0.282172	-0.359514	-0.353255	0.434862	0.352198	0.34617	0.497097	0.466041	0.49027	-0.100702	-0.0777673	-0.0865652	-0.759313	-0.780462	-0.781829	0.528982	positive	1076
Cla97C02G040830	Cla97C02G040830.1	-0.437424	-0.40983	-0.242293	0.378152	0.268974	0.192596	0.36794	0.296753	0.283534	-0.423561	-0.0719821	-0.202859	-0.0233994	-0.0115995	0.0707413	0.509494	0.54878	0.672464	0.435505	0.229925	0.319678	-0.968564	-0.809359	-0.973664	0.671145	positive	1077
Cla97C02G040930	Cla97C02G040930.1	-0.236075	-0.236075	-0.176696	-0.203538	-0.195096	-0.137347	-0.121264	-0.0787124	-0.155249	0.520159	0.474323	0.545569	-0.95609	-0.944628	-0.897603	-0.0540086	-0.0358583	-0.0496346	0.389974	0.372205	0.403358	0.610578	0.562212	0.599495	0.665911	positive	1079
Cla97C02G040950	Cla97C02G040950.1	-0.21086	0.0843449	0.378622	-0.139662	-0.178966	-0.32563	0.0422399	0.00180138	-0.476612	0.338592	0.165039	0.321091	-0.409297	-0.400221	-0.492277	0.0419309	-0.0401743	0.0404557	0.0926299	0.139765	0.0887557	0.301552	0.322673	0.314208	0.0837588	positive	1081
Cla97C02G040970	Cla97C02G040970.1	0.111822	0.215658	0.201816	-0.184429	-0.0488799	-0.100957	0.0555617	-0.0458743	-0.0398818	-0.0443738	-0.0685705	-0.0518918	-0.211352	-0.324017	-0.112179	0.0891949	0.057567	0.0671172	-0.0042034	0.0571132	0.00761497	0.112532	0.120873	0.139739	-0.861543	negative	1082
Cla97C02G041040	Cla97C02G041040.1	0.299537	0.229996	0.257717	-0.356876	-0.185889	-0.260784	-0.345456	-0.356876	-0.248323	0.353087	0.362402	0.251464	0.557988	0.544939	0.436976	-0.0829131	-0.112871	-0.0627169	-0.148429	-0.176941	-0.205588	-0.278876	-0.207543	-0.264026	0.365419	positive	1083
Cla97C02G041070	Cla97C02G041070.1	-0.142254	-0.145467	-0.0763806	-0.0717885	-0.0717885	-0.0641672	-0.0046048	0.00701818	0.0679363	0.192773	0.187676	0.121048	0.206287	0.388272	0.324625	-0.316745	-0.267811	-0.303777	-0.0534019	-0.0413441	-0.067348	0.135264	-0.0191388	0.0151177	-0.0978836	negative	1084
Cla97C02G041170	Cla97C02G041170.1	0.049771	-0.126985	-0.130149	-0.0530636	0.00721053	0.0829379	0.127332	0.101939	0.0399519	-0.119106	0.00576999	0.0143917	0.242566	0.0323555	0.292513	0.137916	0.00463152	0.0517268	-0.0319849	-0.205662	-0.155389	-0.146216	-0.176275	-0.0461819	-0.304868	negative	1085
Cla97C02G041180	Cla97C02G041180.1	-0.0743668	-0.203364	-0.13028	0.0663186	0.112554	0.0593926	0.176684	0.199545	0.224527	-0.157456	-0.157456	-0.116097	-0.0171145	-0.104711	-0.0541245	-0.0306196	-0.109314	-0.0630698	-0.0440231	-0.0200559	-0.0711916	0.17648	0.210304	0.127439	-0.491454	negative	1086
Cla97C02G041200	Cla97C02G041200.1	0.595391	0.62701	0.629026	0.224695	0.239288	0.167578	0.17035	0.1855	0.168965	-0.953923	-1.12687	-0.927012	-0.805721	-0.776553	-0.764594	0.0420211	-0.0527581	0.0362348	0.270672	0.263332	0.289106	0.507032	0.435714	0.555516	-0.790657	negative	1087
Cla97C02G041260	Cla97C02G041260.1	0.00430987	0.195514	0.204315	0.00862287	0.00862287	-0.036579	-0.00870701	-0.00870701	-0.106376	0.0356431	-0.219523	-0.0771363	-0.233457	-0.0967123	-0.354972	-0.14661	0.025684	-0.0707315	0.141744	-0.0911083	0.0184454	0.193029	0.25115	0.363538	-0.636702	negative	1089
Cla97C02G041270	Cla97C02G041270.1	0.01586	0.103831	0.106538	0.135981	0.0471932	0.0612137	-0.171447	-0.131033	-0.268058	0.0273328	0.00719513	0.0653934	0.0383039	0.0377962	-0.00576303	-0.105855	0.012536	-0.0543172	-0.0776403	-0.0057229	-0.0501452	0.0954609	0.0605459	0.0548008	0.248539	positive	1090
Cla97C02G041500	Cla97C02G041500.1	-0.282064	-0.349178	-0.137168	0.0119468	-0.103892	-0.191061	-0.0759679	0.0644659	0.30997	0.373231	0.356252	0.0234654	-0.397136	-0.223212	-0.346723	-0.180178	-0.220829	-0.282837	0.196705	0.236786	0.185401	0.301965	0.354696	0.375362	0.781633	positive	1092
Cla97C02G041610	Cla97C02G041610.1	-0.233649	-0.426046	-0.49911	-0.0334461	-0.0486006	-0.0562379	0.012546	0.0400268	-0.00952519	0.375927	0.393975	0.484139	-0.486869	-0.499329	-0.4016	-0.0596906	-0.0162367	-0.0441536	0.116686	0.117267	0.114962	0.394682	0.334879	0.429403	0.946199	positive	1093
Cla97C02G041620	Cla97C02G041620.1	-0.521798	-0.577874	-0.465784	0.0966196	0.158652	0.141389	0.134695	0.224445	0.0785944	0.288576	0.177013	0.265472	-0.7851	-0.8067	-0.820595	0.110676	0.0647075	0.00826394	0.293485	0.23146	0.260354	0.543248	0.452189	0.448011	0.968268	positive	1094
Cla97C02G041670	Cla97C02G041670.1	-0.368058	-0.533002	-0.375681	0.0807942	0.19198	0.0724145	0.138127	0.227636	0.217538	0.11111	0.11111	0.126032	0.4015	0.401906	0.447051	0.451197	0.371238	0.315686	-0.147211	-0.261142	-0.231903	-0.558748	-0.621827	-0.567749	-0.572725	negative	1095
Cla97C02G041730	Cla97C02G041730.1	0.0740319	0.435061	0.362026	0.00156227	-0.0413298	-0.00574253	0.0698683	-0.0932969	-0.127948	-0.0870851	-0.35167	-0.235477	-0.180181	-0.198579	-0.000403204	0.273092	0.31241	0.491217	0.0160018	-0.0715205	0.0374446	-0.221118	-0.17178	-0.286585	0.0586667	positive	1097
Cla97C02G041790	Cla97C02G041790.1	-0.206097	-0.137926	-0.0926669	0.109167	0.106493	0.102473	0.0822003	0.0671507	0.0463722	0.0309422	-0.0428358	-0.0652732	0.0412407	0.0313175	-0.0520783	0.532462	0.593668	0.530766	0.260652	0.156838	0.227069	-0.699415	-0.789196	-0.833326	0.463101	positive	1099
Cla97C02G041840	Cla97C02G041840.1	0.685283	0.77001	0.706001	-0.377726	-0.329015	-0.383684	-0.450893	-0.495352	-0.448809	0.162966	0.0243721	0.136847	-0.470652	-0.401022	-0.416469	-0.399765	-0.341693	-0.385838	0.232263	0.302962	0.257295	0.577333	0.51476	0.530826	-0.30044	negative	1101
Cla97C02G042030	Cla97C02G042030.1	-0.174723	-1.5513e-05	0.0261896	-0.304784	-0.435769	-0.437758	0.131868	-1.5513e-05	-0.0584808	0.358468	0.414655	0.480365	-0.148233	-0.227593	-0.215487	-0.0574494	-0.0523307	-0.110496	0.0810883	0.065551	0.0105241	0.242943	0.178034	0.233448	0.702331	positive	1104
Cla97C02G042040	Cla97C02G042040.1	0.205666	0.2468	0.261472	-0.165782	-0.0540844	0.0382679	-0.354227	-0.348646	-0.344937	0.31637	0.0396872	0.159414	-0.191254	-0.181849	-0.0586852	-0.121678	-0.0938472	-0.143387	-0.0361415	-0.00586234	-0.0248043	0.294538	0.278776	0.284193	0.184889	positive	1105
Cla97C02G042120	Cla97C02G042120.1	-0.591477	-0.312427	-0.54722	-0.0337364	-0.0246054	-0.0475422	-0.0583722	0.0665115	-0.0521737	0.61834	0.379009	0.603693	-0.45604	-0.455131	-0.477412	-0.113475	-0.0241708	-0.100322	0.0502855	0.000129877	0.0213401	0.517792	0.522078	0.514925	0.965469	positive	1109
Cla97C02G042140	Cla97C02G042140.1	0.83147	0.151186	0.752853	-0.450218	-0.257056	-0.48579	-0.134089	-0.0835199	-0.327445	-0.375701	0.38231	-0.00399954	0.555378	0.620346	0.444223	-0.253787	-0.365846	-0.348722	-0.0870692	-0.145828	-0.232527	-0.0580459	-0.0420912	-0.0860313	0.809513	positive	1111
Cla97C02G042160	Cla97C02G042160.1	0.13791	-0.100824	-0.0930714	-0.0265899	-0.137031	-0.210612	-0.146627	0.160136	0.00842157	0.0482226	0.0828545	0.27721	0.682139	0.777969	0.778802	-0.599272	-0.559671	-0.428894	-0.276402	-0.396745	-0.428989	0.20539	0.103582	0.14209	0.18669	positive	1112
Cla97C02G042180	Cla97C02G042180.1	0.00702631	-0.0578912	-0.0398947	0.0496706	0.0510706	0.103288	-0.0147781	-0.0339455	-0.0147781	-0.0761149	0.044057	-0.0177104	-0.326439	-0.257057	-0.1504	0.0503384	0.113722	0.085241	0.0248564	-0.0454771	0.0187858	0.17601	0.171295	0.139124	0.295962	positive	1113
Cla97C02G042210	Cla97C02G042210.1	-0.11495	-0.0520471	-0.137073	0.071606	0.109681	0.0784792	0.100256	0.102955	0.0549753	-0.0460546	-0.130717	-0.0371123	0.127861	0.151886	0.0691366	-0.0251257	-0.0553032	-0.0345372	0.0153835	-0.0137309	0.0555411	-0.0847037	-0.127807	-0.0786003	-0.173845	negative	1114
Cla97C02G042270	Cla97C02G042270.1	-0.0925776	0.0111068	0.0440759	0.1146	0.0651786	0.121332	-0.273254	-0.275021	-0.219525	0.238668	0.194661	0.0707542	0.265547	0.307483	0.197441	-0.0284781	-0.0596438	-0.126568	-0.152979	-0.203911	-0.172318	-0.0227477	0.0243363	-0.0281602	0.296318	positive	1116
Cla97C02G042310	Cla97C02G042310.1	0.733936	0.823573	0.729305	0.0424853	0.0514184	0.0880556	-0.24586	-0.267915	-0.227736	-0.470382	-0.721109	-0.535772	1.46459	1.5673	1.43904	-0.137119	-0.166618	-0.286298	-0.424965	-0.654356	-0.47578	-0.717126	-0.871205	-0.737462	0.966561	positive	1117
Cla97C02G042320	Cla97C02G042320.1	-0.152774	-0.147963	-0.191857	0.0352444	0.0590218	0.0436812	0.0959984	0.039469	0.0714529	0.0617935	0.0492785	0.036654	-0.254366	-0.286784	-0.263736	0.000130378	0.189718	0.0248764	0.0206959	0.0175928	0.0850878	0.114535	0.171067	0.181183	0.901592	positive	1118
Cla97C02G042330	Cla97C02G042330.1	-0.292056	-0.562358	-0.312132	-0.0894766	-0.126164	-0.147321	-0.119716	-0.197361	0.0399864	0.576139	0.778679	0.451781	-0.416277	-0.539024	-0.478264	0.138096	0.256979	0.184227	0.204978	0.149748	0.214104	0.136387	0.0935071	0.0555372	0.491486	positive	1119
Cla97C02G042370	Cla97C02G042370.1	-0.175185	-0.245233	-0.159882	-0.173477	0.041825	-0.0586564	-0.585672	-0.010588	-0.335952	0.803288	0.413192	0.48634	-0.0334182	0.0115327	-0.0559309	0.222404	0.112574	0.12163	0.099513	0.00254749	0.0742028	-0.182841	-0.218515	-0.153698	-0.733356	negative	1120
Cla97C02G042380	Cla97C02G042380.1	-0.631415	-0.487244	-0.652241	-0.0680551	-0.0633988	-0.0587574	0.413814	0.374316	0.393636	0.276088	0.218622	0.284635	-1.82126	-1.77162	-1.86464	0.243364	0.315074	0.220113	0.910732	0.837272	0.893813	0.707383	0.65182	0.677958	0.966661	positive	1121
Cla97C02G042440	Cla97C02G042440.1	-0.456532	-0.495665	-0.452474	0.0390191	0.0303455	0.0186991	0.303014	0.332712	0.317346	0.117552	0.117552	0.128431	-0.961365	-0.901988	-0.941876	0.657884	0.665082	0.572901	0.407682	0.331475	0.374798	-0.0779325	-0.0688974	-0.0577629	0.818528	positive	1122
Cla97C02G042510	Cla97C02G042510.1	-0.00457642	0.0590154	-0.156236	-0.252214	-0.35701	-0.347162	-0.423748	-0.606668	-0.397087	0.762414	0.847199	0.876071	0.293689	0.35987	0.20558	-0.0890813	-0.0428333	-0.0207671	-0.118837	-0.117373	-0.122493	-0.140756	-0.169761	-0.0372362	-0.0762346	negative	1123
Cla97C02G042530	Cla97C02G042530.1	0.0306081	-0.068114	0.118992	-0.0665897	-0.00983045	-0.0364383	0.00619157	0.0685574	0.0320316	-0.00252565	-0.0334575	-0.0394252	0.217109	0.289867	0.319072	-0.287089	-0.228435	-0.325372	-0.158892	-0.140159	-0.0899358	0.203493	0.0836519	0.116689	0.259318	positive	1125
Cla97C02G042600	Cla97C02G042600.1	0.314179	0.335482	0.382864	0.0776078	0.0506673	0.0202936	-0.0516313	-0.00180013	0.0275837	-0.330423	-0.450879	-0.373944	0.506508	0.468614	0.472848	-0.0117213	0.0395217	-0.0370332	-0.295378	-0.291078	-0.268629	-0.138567	-0.230815	-0.21427	0.786299	positive	1127
Cla97C02G042690	Cla97C02G042690.1	0.187755	0.0883093	0.171223	0.0801584	0.117808	0.112489	0.0231934	0.0991059	0.0719613	-0.30477	-0.271361	-0.375871	-0.73242	-0.707574	-0.670348	0.0971453	0.0304086	0.0699183	0.249562	0.289012	0.241189	0.374958	0.388474	0.369675	-0.629859	negative	1128
Cla97C02G042740	Cla97C02G042740.1	-0.275092	-0.469779	-0.217342	0.201123	0.213901	0.109724	0.189524	0.220248	0.199838	-0.04152	-0.0521898	-0.0784353	0.198251	0.275274	0.224703	0.125704	0.204122	0.147809	-0.190207	-0.172148	-0.176784	-0.185894	-0.225246	-0.225585	-0.418264	negative	1131
Cla97C02G042770	Cla97C02G042770.1	-0.0193392	-0.164347	-0.105518	0.00683941	0.0424282	0.0744121	0.19063	0.21329	0.0550282	-0.217235	-0.0670853	-0.00910214	0.649716	0.612701	0.638103	-0.207679	-0.278525	-0.202549	-0.120643	-0.0649635	0.00708588	-0.377622	-0.295592	-0.360033	-0.24847	negative	1132
Cla97C02G042820	Cla97C02G042820.1	0.621009	0.351295	0.186235	0.0326122	0.0458144	-0.0586318	-0.338403	-0.217804	-0.121193	-0.377032	-0.11465	-0.00925128	0.561651	0.67963	0.543095	0.00901957	0.155589	0.0346795	-0.545305	-0.565322	-0.532036	-0.0662395	-0.107111	-0.16765	0.823269	positive	1133
Cla97C02G042880	Cla97C02G042880.1	-0.373926	-0.340199	-0.257428	-0.0908102	-0.135107	0.0822275	0.1231	0.0753014	-0.0508608	0.329282	0.380751	0.257669	-0.495272	-0.451856	-0.367772	0.131081	0.0146095	-0.0746559	0.067704	-0.0307056	0.0375288	0.359751	0.459073	0.350515	0.923664	positive	1135
Cla97C02G042900	Cla97C02G042900.1	0.785425	1.16213	0.942026	0.0500246	0.091666	0.192924	-0.052084	-0.41922	-0.240178	-0.380746	-1.34739	-0.784578	-0.839207	-0.863139	-0.859072	0.214227	0.243621	0.226014	0.261453	0.250054	0.276041	0.396827	0.349008	0.344172	-0.845552	negative	1136
Cla97C02G042980	Cla97C02G042980.1	0.208844	0.155428	0.247957	0.211399	-0.00144942	0.245465	0.0480026	0.0205769	-0.0572637	-0.343868	-0.314159	-0.420933	0.38311	0.347112	0.381564	-0.0575891	0.100824	-0.0330139	-0.262305	-0.19815	-0.182901	-0.127533	-0.170413	-0.180706	0.58604	positive	1138
Cla97C02G043090	Cla97C02G043090.1	-0.518734	-0.257789	-0.112072	-0.0175851	8.95459e-06	0.0302915	0.211116	0.0613488	-0.0175851	0.260613	0.213631	0.146756	0.52586	0.76971	0.574306	-0.742823	-0.677382	-0.626283	-0.245909	-0.566655	-0.156257	0.244302	0.45513	0.446002	-0.293273	negative	1140
Cla97C02G043280	Cla97C02G043280.1	0.058747	0.134625	0.168541	-0.109266	-0.174818	-0.150489	0.178819	0.00633112	0.0629146	-0.124982	0.0263888	-0.0768101	-0.72755	-0.586372	-0.722201	-0.444847	-0.579	-0.313625	0.323116	0.314226	0.384968	0.787081	0.804297	0.759908	-0.114459	negative	1143
Cla97C02G043300	Cla97C02G043300.1	0.28437	0.273582	0.164907	0.0189455	0.1134	0.0585902	-0.269286	-0.285149	-0.184196	-0.041145	-0.119563	-0.0144551	0.494838	0.434969	0.499474	0.407657	0.209011	0.313632	-0.236677	-0.119882	-0.263676	-0.491021	-0.554998	-0.693326	0.679886	positive	1144
Cla97C02G043390	Cla97C02G043390.1	0.0132151	0.398816	0.0893461	-0.018399	-0.142742	-0.103684	0.06075	-0.097532	0.116063	-0.109863	-0.0536961	-0.152275	0.432928	0.463123	0.489557	0.142299	0.157484	0.13945	-0.0839355	-0.136867	-0.0311009	-0.561401	-0.482089	-0.529447	0.57297	positive	1145
Cla97C02G043570	Cla97C02G043570.1	0.672406	0.498303	0.770988	0.168554	0.196673	0.154969	-0.266909	-0.27608	-0.220134	-0.642863	-0.340043	-0.715865	1.66711	1.64801	1.76279	0.485036	0.50763	0.582739	-0.725916	-0.706234	-0.730918	-1.45057	-1.50855	-1.53111	0.977497	positive	1148
Cla97C02G043620	Cla97C02G043620.1	0.197809	0.283761	0.305366	-0.10531	-0.253622	-0.370563	-0.0132895	-0.0493964	-0.00145198	-0.0132895	0.0392309	-0.0192449	1.32155	1.37831	1.29623	-0.408616	-0.402453	-0.416071	-0.467227	-0.413041	-0.371308	-0.470112	-0.57368	-0.473585	0.780791	positive	1149
Cla97C02G043670	Cla97C02G043670.1	0.0230552	0.0879381	0.0989301	0.378071	0.34729	0.16971	0.020167	0.181392	0.0975607	-0.369082	-0.627579	-0.407454	-0.36385	-0.246953	-0.334073	0.195124	0.149506	0.061741	0.167787	0.0355329	0.0473493	0.100051	0.112005	0.0757811	-0.0754491	negative	1151
Cla97C02G043720	Cla97C02G043720.1	-0.289102	-0.389537	-0.342169	-0.108636	-0.103888	-0.119776	0.00562131	0.0658619	0.107401	0.37339	0.456104	0.34473	0.124053	0.218288	0.0444614	-0.201079	-0.268758	-0.200238	0.0256016	-0.0153774	0.0616236	0.107498	0.0375671	0.0663602	0.0514875	positive	1153
Cla97C02G043810	Cla97C02G043810.1	0.369351	0.507167	0.525823	-0.277162	-0.540556	-0.774133	-0.00012198	-0.360364	-0.0856401	-0.0090459	0.290328	0.354353	0.435718	0.333028	0.374219	0.132091	0.0384656	0.0697943	-0.11559	-0.152503	-0.198446	-0.332189	-0.299662	-0.284925	0.236541	positive	1154
Cla97C02G043820	Cla97C02G043820.1	-0.0565187	-0.00775941	-0.0640524	-0.0194294	-0.0048566	-0.0792388	0.079618	0.165874	0.0986368	0.00381694	-0.162509	0.0464193	0.681799	0.671308	0.665909	-0.401544	-0.33122	-0.356225	-0.204091	-0.242968	-0.31955	-0.0836789	-0.0603253	-0.0194155	-0.311172	negative	1155
Cla97C02G043860	Cla97C02G043860.1	0.531367	0.687698	0.550842	-0.0381985	-0.0833107	-0.047417	-0.167912	-0.247125	-0.142995	-0.27573	-0.440023	-0.327195	1.08467	1.02754	1.08364	0.0493278	0.0131562	0.139899	-0.312847	-0.435549	-0.377206	-0.746433	-0.843201	-0.682993	0.977904	positive	1157
Cla97C02G043880	Cla97C02G043880.1	-0.0556408	0.0101515	-0.142339	0.48531	0.32534	0.281203	-0.00158975	0.102164	0.224377	-0.471188	-0.419085	-0.338702	0.0924587	0.30568	0.133904	-0.0458725	0.0324523	-0.0271075	-0.090357	-0.0591349	-0.116898	-0.00729191	-0.134137	-0.083696	0.0366909	positive	1158
Cla97C02G043890	Cla97C02G043890.1	1.07732	0.91022	0.889906	0.523264	0.39502	0.489617	-0.616305	-0.636661	-0.366384	-1.4338	-0.447223	-0.784967	2.10841	2.07727	2.01978	0.976973	0.927425	0.917113	-0.909959	-0.905167	-0.946624	-2.14166	-2.03619	-2.08736	0.958406	positive	1159
Cla97C02G043930	Cla97C02G043930.1	0.453988	0.644694	0.622587	0.720991	0.857954	0.694996	-0.153808	-0.265203	-0.126808	-0.74241	-1.56764	-1.13935	0.0222504	-0.0129543	0.0350603	-0.0599205	-0.0330755	-0.00878851	0.0811708	0.0218969	-0.00714186	-0.0396017	-0.0280941	0.0291979	-0.0897848	negative	1160
Cla97C02G043970	Cla97C02G043970.1	-0.167059	-0.217626	-0.238359	-0.0880975	-0.0849646	-0.064765	-0.190436	-0.222781	-0.195495	0.504164	0.520712	0.444707	-0.198332	-0.145804	-0.184012	0.13503	0.114538	0.0953438	0.107474	0.0111807	0.0878535	0.0509353	-0.0338336	-0.0403735	0.0773851	positive	1161
Cla97C02G043980	Cla97C02G043980.1	0.319644	-0.0647222	-0.162924	-0.300928	-0.289971	-0.0187726	-0.437332	-0.463767	0.346809	0.408649	0.701819	-0.0385046	-0.430904	-0.409533	-0.382783	-0.0995033	-0.10668	-0.148077	0.102103	0.0561613	-0.0061361	0.528331	0.406399	0.490621	0.311279	positive	1162
Cla97C02G044030	Cla97C02G044030.1	-0.174235	-0.415545	-0.304296	-0.00836931	-0.0157792	-0.00689189	0.145702	0.166802	0.125636	0.120238	0.129672	0.237067	-0.155464	0.000774583	-0.0135744	-0.0805797	-0.0328227	-0.00743443	-0.0186251	-0.00352364	-0.00488968	0.0631088	0.177441	0.0755894	0.422632	positive	1163
Cla97C02G044070	Cla97C02G044070.1	-0.612456	-0.523373	-0.411222	-0.0475422	-0.0428908	-0.0537674	0.0456643	-0.025963	-0.00621018	0.583774	0.572703	0.521283	-0.808971	-0.840986	-0.726283	0.435758	0.45869	0.436612	0.282288	0.263639	0.291153	0.0460255	0.0757961	0.0862785	0.587125	positive	1164
Cla97C02G044110	Cla97C02G044110.1	0.272264	0.124133	0.0304898	0.10264	0.162291	0.11611	-0.0927147	-0.0157729	0.0725539	-0.306096	-0.267102	-0.198796	0.112961	0.036437	0.00263993	-0.045785	0.0293572	0.0478363	-0.148253	-0.306346	-0.22954	0.139814	0.148131	0.212747	-0.260203	negative	1166
Cla97C02G044120	Cla97C02G044120.1	-0.280604	-0.226699	-0.142768	-0.282436	-0.176438	-0.149439	-0.295326	-0.0571658	-0.202216	0.736685	0.593199	0.483207	0.374342	0.552962	0.570473	-0.316199	-0.378285	-0.278661	-0.0481639	-0.0101195	-0.113053	-0.263392	0.0463213	-0.136225	-0.227224	negative	1167
Cla97C02G044200	Cla97C02G044200.1	0.16101	0.110616	0.121373	-0.090343	-0.0887925	-0.139253	-0.238903	-0.291434	-0.282545	0.168808	0.339741	0.229722	0.522234	0.586826	0.411904	-0.106784	-0.146004	-0.172467	-0.136138	-0.248638	-0.172928	-0.157635	-0.168126	-0.212244	0.364637	positive	1170
Cla97C02G044300	Cla97C02G044300.1	-0.0985093	-0.0814542	-0.0768376	0.18389	0.251529	0.23677	-0.251379	-0.203626	-0.27058	0.110227	0.115615	0.0843547	0.3484	0.331533	0.424915	0.0956472	0.108343	0.0969254	-0.260821	-0.263135	-0.240175	-0.29165	-0.194381	-0.155601	0.163976	positive	1173
Cla97C02G044330	Cla97C02G044330.1	-0.202581	-0.209378	-0.200886	-0.200886	-0.223069	-0.205975	-0.175708	-0.128241	-0.137934	0.523836	0.603563	0.557259	0.517288	0.493352	0.597866	-0.551029	-0.520462	-0.48382	-0.0998834	-0.0956036	-0.0827878	0.108278	0.0671112	0.0496928	0.111035	positive	1174
Cla97C02G044340	Cla97C02G044340.1	0.532023	0.50582	0.409605	0.190225	0.226619	0.216314	-0.0529392	-0.0467207	-0.038985	-0.705684	-0.722932	-0.513345	0.453956	0.600045	0.482996	-0.209258	0.0579904	-0.157957	-0.204505	-0.353992	-0.227437	-0.00472204	-0.250572	-0.186543	0.62746	positive	1175
Cla97C02G044570	Cla97C02G044570.1	-0.0742092	-0.144677	0.00929457	-0.0710865	-0.0448128	-0.0175055	0.285057	0.288708	0.38508	-0.072647	-0.118652	-0.42455	-0.48832	-0.520847	-0.533561	0.256466	0.286653	0.266751	0.13981	0.0676314	0.142374	0.127841	0.116258	0.138944	0.13246	positive	1179
Cla97C02G044610	Cla97C02G044610.1	-0.184847	-0.112577	-0.157118	-0.133086	-0.15067	-0.15067	0.0970035	0.0375453	0.0668892	0.209038	0.261953	0.216539	0.18741	0.140659	0.215533	-0.560264	-0.48584	-0.472774	0.261781	0.345031	0.357868	-0.0107506	0.00353492	0.0178118	0.328758	positive	1180
Cla97C02G044620	Cla97C02G044620.1	-0.0786766	-0.052927	0.0145284	0.0527009	0.0316187	0.0568806	0.0145284	0.0898893	0.0159603	-0.0114929	-0.0695359	-0.0634742	0.0989112	0.153775	0.190718	0.0807781	0.118452	0.115786	-0.162359	-0.0827159	-0.121134	-0.120503	-0.0974514	-0.174258	0.107117	positive	1181
Cla97C02G044670	Cla97C02G044670.1	-0.279135	-0.39314	-0.284449	0.055467	0.0928338	0.0582683	0.0982882	0.107784	0.103722	0.125255	0.171268	0.143837	0.291203	0.384604	0.323461	0.290244	0.37289	0.310621	-0.220352	-0.162122	-0.125879	-0.459396	-0.52009	-0.485185	-0.663526	negative	1182
Cla97C02G044700	Cla97C02G044700.1	-0.021796	-0.0816675	-0.0469384	0.0201079	-0.0262012	-0.0559179	-0.0484311	0.0101041	-0.0529185	0.0538897	0.0977356	0.152033	-0.132821	-0.137121	-0.153964	0.124722	0.132109	0.14257	0.131172	0.140864	0.170055	-0.13779	-0.137952	-0.141845	-0.387151	negative	1183
Cla97C02G044710	Cla97C02G044710.1	0.21001	-0.0159572	-0.0277947	0.0403996	0.165222	-0.0100746	0.109574	0.255892	0.185869	-0.36616	-0.441347	-0.105632	-0.164894	-0.068052	-0.333323	-0.00368885	-0.0410157	0.0720148	0.0652233	0.0904302	0.0825318	0.119058	0.114472	0.0672434	-0.269215	negative	1184
Cla97C02G044830	Cla97C02G044830.1	0.508897	0.505617	0.549812	0.400048	0.457764	0.403577	0.145703	0.236879	0.135836	-0.982001	-1.34282	-1.01931	0.371437	0.369245	0.323438	0.215823	0.351063	0.253615	-0.322565	-0.261005	-0.24315	-0.295784	-0.369565	-0.392552	0.768777	positive	1188
Cla97C02G044860	Cla97C02G044860.1	0.297433	0.537336	0.450633	-0.0794029	-0.419715	-0.149481	0.0312829	0.0370307	-0.0274908	-0.180828	-0.2283	-0.268499	-0.716283	-0.616637	-0.809149	-0.077807	-0.17298	-0.162434	0.744415	0.664084	0.647449	0.207927	0.0586738	0.232742	-0.517458	negative	1191
Cla97C02G044880	Cla97C02G044880.1	-0.186431	-0.0144597	-0.193149	-0.276305	-0.188108	-0.0567174	-0.150031	-0.263875	-0.0767659	0.562549	0.466711	0.376582	-0.0585532	-0.14697	-0.0166479	0.0236511	-0.0783209	-0.0639935	0.082704	0.0427008	0.103504	0.0186832	0.0500603	0.0431815	0.193715	positive	1192
Cla97C02G044890	Cla97C02G044890.1	-0.256721	-0.0927162	-0.107024	0.105061	0.285065	0.49751	0.381595	0.401946	0.396322	-0.00823414	-0.696788	-0.906015	-0.421008	-0.389119	-0.464278	-0.0438627	-0.0660843	-0.016516	0.136781	0.104802	0.216325	0.31671	0.319535	0.306714	-0.112961	negative	1193
Cla97C02G044940	Cla97C02G044940.1	0.00521715	0.0323712	0.0309547	0.0756065	0.175142	0.128221	0.205596	0.248886	0.167427	-0.419471	-0.415603	-0.234349	-0.00702729	0.0284314	0.0191267	0.0598985	0.0593474	0.0488578	-0.0277575	-0.0463912	-0.0440248	0.0211671	-0.047413	-0.0642151	0.20789	positive	1195
Cla97C02G045240	Cla97C02G045240.1	-0.239904	-0.112624	-0.259293	-0.0150128	-0.0346211	-0.0498879	-0.245166	-0.387246	-0.302523	0.482986	0.607898	0.555395	-0.00781615	-0.0103971	0.0231802	-0.134843	-0.12645	-0.186311	0.0264494	-0.0944478	-0.0858315	0.234082	0.212419	0.149964	0.741112	positive	1199
Cla97C02G045300	Cla97C02G045300.1	0.240203	0.135116	0.383043	0.0232229	0.0900065	0.19056	0.0130065	-0.0180841	-0.130073	-0.208166	-0.281717	-0.437118	1.63629	1.69694	1.73925	0.396968	0.275882	0.301804	-0.766653	-0.887903	-0.771405	-1.32289	-1.04118	-1.2571	0.86075	positive	1200
Cla97C02G045340	Cla97C02G045340.1	0.0894064	0.0519317	0.0589453	0.0533372	0.065925	0.0547413	-0.360296	-0.338015	-0.349112	0.229026	0.240176	0.203935	0.188546	0.169095	0.233428	0.146562	0.174196	0.120957	-0.161514	-0.154884	-0.126762	-0.151644	-0.225446	-0.212534	0.196224	positive	1201
Cla97C02G045440	Cla97C02G045440.1	0.0581238	-0.103816	0.115457	-0.167522	-0.21217	-0.197133	0.183423	0.0925245	0.0622955	-0.0699412	0.183423	0.055336	-0.272844	-0.234997	-0.206856	0.0382417	0.0820922	0.0263381	0.0911853	0.0468537	0.107378	0.114007	0.0727221	0.135879	-0.0159608	negative	1203
Cla97C02G045530	Cla97C02G045530.1	0.283996	0.298399	0.351165	0.0809746	0.168519	0.109843	0.0795854	0.0415619	-0.0122274	-0.434194	-0.505377	-0.462247	0.189049	0.175022	0.0693886	-0.382431	-0.18935	-0.292674	-0.106265	-0.193737	-0.145829	0.294281	0.299891	0.282655	-0.476024	negative	1205
Cla97C02G045550	Cla97C02G045550.1	0.182052	0.161312	0.194864	0.150829	0.13363	0.0972409	-0.0521863	-0.0133537	-0.078154	-0.311894	-0.269039	-0.195302	0.310255	0.375127	0.244803	0.315111	0.285729	0.320629	-0.226296	-0.275726	-0.20074	-0.356629	-0.400561	-0.391702	0.924484	positive	1206
Cla97C02G045640	Cla97C02G045640.1	-0.0907099	-0.392654	-0.141115	0.0422834	0.0465121	0.0908636	0.119245	0.315399	0.00365664	-0.0360328	-0.0123816	0.0549325	-0.403943	-0.386875	-0.377284	-0.123576	-0.156507	0.0109002	0.0995232	0.144971	0.0920029	0.34976	0.353923	0.397105	0.54056	positive	1210
Cla97C02G045750	Cla97C02G045750.1	-0.44677	-0.424835	-0.471086	0.122027	0.031174	0.0569116	0.210048	0.319237	0.300207	0.148869	0.101563	0.0526537	-0.248329	-0.233488	-0.314043	-0.22858	-0.22125	-0.23105	0.0539284	0.0399767	-0.00973976	0.506026	0.425313	0.461235	0.496018	positive	1212
Cla97C02G045770	Cla97C02G045770.1	-0.515054	-0.461575	-0.47423	0.136626	0.108612	0.10578	-0.276563	-0.389886	-0.24369	0.683165	0.74088	0.585934	-0.924048	-1.00355	-0.916801	0.170693	0.174505	0.15695	0.246021	0.222534	0.277926	0.54474	0.534277	0.516751	0.754431	positive	1213
Cla97C02G045800	Cla97C02G045800.1	0.442144	0.217426	0.376307	-0.0175554	-0.0549136	0.0599812	-0.174813	-0.041353	-0.116775	-0.29125	-0.153585	-0.245614	1.88652	1.85439	1.78163	-0.967202	-1.05639	-0.802112	-0.48845	-0.448217	-0.421419	-0.506386	-0.406812	-0.425551	0.822233	positive	1214
Cla97C02G045810	Cla97C02G045810.1	0.0430728	0.0529785	0.132539	0.0572031	0.145823	0.116434	-0.0568687	-0.0721678	-0.00456432	-0.120653	-0.106408	-0.187389	-0.794654	-0.754315	-0.689125	0.102032	0.0771417	0.0742744	0.263852	0.133607	0.164606	0.471954	0.463669	0.486958	-0.638503	negative	1215
Cla97C02G045820	Cla97C02G045820.1	0.559687	0.590586	0.458496	-0.121612	-0.095992	-0.0491472	-0.0880781	-0.132966	0.0445383	-0.352376	-0.388853	-0.424283	0.071873	0.312915	0.102078	0.00561679	-0.0193326	-0.0679003	-0.0404106	-0.071176	-0.145502	-0.0661203	-0.0544359	-0.0276057	0.733948	positive	1216
Cla97C02G045830	Cla97C02G045830.1	0.120418	0.133777	0.0657122	-0.0609596	-0.0174881	0.00303844	-0.0145378	-0.00572289	0.0643177	-0.0839695	-0.0670598	-0.137525	1.85245	1.87302	1.75474	0.433998	0.349903	0.389755	-0.628393	-0.681143	-0.749678	-1.41111	-1.5812	-1.60234	0.807942	positive	1217
Cla97C02G045860	Cla97C02G045860.1	0.0997492	0.369341	0.194472	0.0485403	-0.0826372	-0.0325965	0.0583689	0.0942999	0.111935	-0.163557	-0.441685	-0.256231	1.01009	1.15752	1.04691	-0.303475	-0.225029	-0.192008	-0.432945	-0.291521	-0.420799	-0.346896	-0.556735	-0.445114	0.685089	positive	1218
Cla97C02G045890	Cla97C02G045890.1	0.341447	0.647137	0.537014	0.198903	0.0593315	0.0493375	0.0791141	-0.0181179	-0.0920394	-0.643422	-0.615898	-0.542806	-0.316025	-0.373206	-0.329938	0.115114	0.112215	0.136532	0.139785	0.189411	0.154903	0.0297942	0.067716	0.0736992	-0.612628	negative	1220
Cla97C02G045970	Cla97C02G045970.1	0.104735	0.108801	0.0295193	0.0745632	0.0648294	0.0550294	0.0910986	0.118243	0.0690091	-0.287413	-0.119468	-0.308946	-0.160978	-0.166557	-0.150065	-0.0112795	0.0515032	0.0394554	0.0110777	-0.00391276	-0.00156245	0.151928	0.107088	0.133303	-0.715379	negative	1222
Cla97C02G046000	Cla97C02G046000.1	0.158906	0.198894	0.153664	-0.0444295	-0.220391	-0.093443	-0.132928	-0.051979	-0.0131463	0.0403733	-0.00140509	0.00588495	-0.221784	-0.209335	-0.206294	-0.401791	-0.426084	-0.45296	0.111675	0.0838412	0.12916	0.557373	0.506286	0.529913	0.0959365	positive	1223
Cla97C02G046130	Cla97C02G046130.1	0.0135611	-0.00375142	0.00637279	0.0349137	0.036326	0.0149945	0.0862704	0.0306684	0.0889951	-0.0858721	-0.0705892	-0.151889	-0.0958543	-0.07713	-0.0636541	0.141524	0.178872	0.0981944	-0.125938	-0.139222	-0.0943115	0.145547	0.0169542	0.0150183	-0.31259	negative	1226
Cla97C02G046270	Cla97C02G046270.1	0.342589	0.299099	0.288319	0.173243	0.23692	0.245615	-0.16736	-0.234867	-0.234867	-0.351785	-0.302064	-0.294841	1.34634	1.46617	1.5058	0.125997	-0.147055	-0.292808	-0.786082	-0.816385	-0.920359	-0.50656	-0.582235	-0.392824	0.793717	positive	1227
Cla97C02G046300	Cla97C02G046300.1	-0.0510843	-0.0790083	-0.102698	-0.166177	-0.179551	-0.215259	0.260049	0.190278	0.34773	0.0105723	-0.0327641	0.0179142	3.38103	3.49046	3.37706	-0.842807	-0.45191	-0.495218	-1.31389	-1.14045	-1.42235	-1.62352	-1.6182	-1.3402	-0.366114	negative	1228
Cla97C02G046320	Cla97C02G046320.1	0.516666	0.568725	0.507281	-0.0939895	-0.195908	-0.109949	-0.122844	-0.201027	-0.117995	-0.237377	-0.255014	-0.258568	-0.11589	-0.0405688	-0.0620217	-0.154499	-0.154257	-0.142012	0.00867947	-0.00108742	-0.0281567	0.25824	0.212123	0.21945	-0.416714	negative	1229
Cla97C02G046360	Cla97C02G046360.1	0.628041	0.561801	0.578898	0.0221522	-0.132959	-0.0610887	-0.166088	-0.108602	-0.123167	-0.540918	-0.279332	-0.378739	1.47175	1.51632	1.53116	-0.150478	-0.204457	-0.251649	-0.581652	-0.675774	-0.593094	-0.719334	-0.633135	-0.709662	0.958495	positive	1230
Cla97C02G046520	Cla97C02G046520.1	-0.0695583	-0.312236	-0.271192	-0.144928	0.0208713	-0.125714	-0.00669238	0.0323213	0.00788042	0.232963	0.267285	0.369	-0.272034	-0.270861	-0.261424	-0.0393113	-0.0214231	-0.0771173	-0.00109581	-0.00553565	-0.00579061	0.359715	0.287509	0.307367	0.921809	positive	1231
Cla97C02G046580	Cla97C02G046580.1	-0.123111	-0.612712	-0.264467	0.0923951	0.339232	0.40073	0.0687324	0.15322	0.0418183	-0.0120797	0.0701351	-0.153894	-1.09002	-1.0393	-1.02427	0.269629	0.335135	0.215497	0.392033	0.350931	0.391619	0.406704	0.365972	0.426074	0.696858	positive	1232
Cla97C02G046600	Cla97C02G046600.1	0.0885945	0.11454	0.00637546	0.0295285	0.110475	-0.077718	-0.0592807	-0.126468	0.0523159	-0.218937	-0.0230984	0.103673	0.153306	0.103323	0.145522	-0.255257	-0.101501	-0.141105	-0.0425764	-0.167905	-0.116157	0.161906	0.130302	0.130145	0.0641281	positive	1233
Cla97C02G046640	Cla97C02G046640.1	0.0597857	0.0528396	-0.0951461	0.0346218	0.0926691	-0.0273307	0.0514464	-0.0721849	0.0232954	-0.148585	-0.0721849	0.100774	0.161738	0.186264	0.129237	-0.216529	-0.27407	-0.175784	-0.126096	-0.00508861	-0.0555276	0.142412	0.0917956	0.141648	-0.285659	negative	1234
Cla97C02G046720	Cla97C02G046720.1	1.25927	1.18354	1.53135	-0.330712	-0.309307	-0.722221	-0.324257	-0.210763	-0.419658	-0.383419	-0.298722	-0.975107	2.57606	2.58396	2.49617	-0.708493	-0.810496	-0.684504	-0.525644	-0.60118	-0.839606	-1.1155	-1.16414	-1.20662	0.966344	positive	1236
Cla97C02G046770	Cla97C02G046770.1	-0.305577	-0.401229	-0.383882	0.127047	0.0368922	0.0225083	0.15896	0.136428	0.210629	0.0888995	0.186317	0.123007	0.24829	0.263617	0.25623	-0.0336047	-0.00560913	-0.0892003	-0.0575979	0.0300979	0.0307299	-0.205951	-0.209721	-0.227281	-0.833445	negative	1237
Cla97C02G046860	Cla97C02G046860.1	-0.0747961	-0.214288	-0.122968	0.171844	0.153697	0.0924094	0.104607	0.213738	0.156303	-0.197551	-0.167906	-0.115089	-1.0537	-0.926114	-0.835129	-0.0495153	0.0201095	-0.018922	0.294338	0.237389	0.293143	0.657873	0.685003	0.695527	0.157163	positive	1239
Cla97C02G046920	Cla97C02G046920.1	-0.0342708	-0.0733869	-0.0432039	0.185575	0.120401	0.189393	0.234442	0.227031	0.157261	-0.437483	-0.309827	-0.215932	1.44082	1.46846	1.55331	0.170316	0.157393	0.113065	-0.639962	-0.598709	-0.59202	-0.992892	-1.06148	-1.0183	0.182447	positive	1241
Cla97C02G047000	Cla97C02G047000.1	0.204671	0.292134	0.347245	0.0163734	-0.0158179	0.0178197	0.0506908	0.0264672	-0.032187	-0.288651	-0.31572	-0.303025	0.887482	0.90667	0.759427	-0.33513	-0.294175	-0.347714	-0.284564	-0.407261	-0.444806	-0.224866	-0.124263	-0.090799	0.652092	positive	1245
Cla97C02G047020	Cla97C02G047020.1	-0.132714	-0.213573	-0.105688	0.0579234	0.0508756	-0.0200791	0.0151103	0.0816319	0.0579234	0.0508756	0.0746991	0.0830144	0.210051	0.252648	0.204546	0.145985	0.160296	0.0614203	-0.114533	-0.137543	-0.0986623	-0.238715	-0.276184	-0.169309	-0.741726	negative	1246
Cla97C02G047030	Cla97C02G047030.1	-0.769089	-0.652419	-0.614761	0.0667917	0.0997281	0.133313	0.410571	0.456624	0.42759	0.182269	0.108198	0.151184	-0.977973	-0.978537	-0.935031	0.384142	0.451102	0.434705	0.223848	0.181846	0.259174	0.345826	0.312254	0.298645	0.904205	positive	1247
Cla97C02G047090	Cla97C02G047090.1	-0.023962	-0.0936856	-0.0599189	0.247678	0.240305	0.190163	0.0677595	0.146127	0.111522	-0.293225	-0.305762	-0.227002	-0.715086	-0.637587	-0.632282	-0.232753	-0.334966	-0.260072	0.27223	0.264364	0.168635	0.672872	0.716568	0.718077	-0.486624	negative	1248
Cla97C02G047120	Cla97C02G047120.1	-0.0625561	-0.117291	-0.206789	-0.0491908	0.050739	0.0521176	0.0767095	0.0767095	0.0875062	0.0767095	0.11415	-0.0988142	-0.737888	-0.663515	-0.806984	-0.0784677	-0.201434	-0.0940864	0.311453	0.22522	0.2262	0.538798	0.667512	0.613192	0.672835	positive	1249
Cla97C02G047190	Cla97C02G047190.1	-0.0165034	0.0500054	-0.0120711	0.0668628	0.160147	0.0696533	0.118981	0.104087	0.141701	-0.252275	-0.217841	-0.212746	0.959181	1.02841	1.03238	-0.30279	-0.324857	-0.305905	-0.400904	-0.400228	-0.386982	-0.261691	-0.339935	-0.296673	-0.0115931	negative	1251
Cla97C02G047240	Cla97C02G047240.1	0.227059	0.176341	0.40251	-0.237814	-0.334455	-0.370739	-0.180756	-0.442096	-0.253775	0.16438	0.572058	0.277288	-0.640268	-0.680711	-0.680546	0.0839928	0.152649	0.107401	0.29112	0.293072	0.300108	0.298273	0.243936	0.230973	-0.428267	negative	1252
Cla97C02G047260	Cla97C02G047260.1	-0.396753	-0.156925	0.126809	0.372839	-0.0504746	0.0500668	0.203477	0.121461	-0.15206	-0.261343	0.124138	0.0187645	0.45093	0.299644	0.320046	-0.139372	-0.0370484	-0.193194	-0.104037	-0.12886	-0.0700531	-0.140542	-0.164627	-0.0928856	-0.49069	negative	1253
Cla97C02G047290	Cla97C02G047290.1	0.47348	0.708216	0.570989	-0.0851486	0.291026	0.0835333	-0.17581	-0.460787	-0.285345	-0.0598097	-0.756526	-0.303818	0.890705	0.877915	0.793191	0.946469	0.932467	0.956574	-0.434368	-0.385891	-0.443723	-1.38156	-1.34238	-1.4094	0.753073	positive	1254
Cla97C02G047410	Cla97C02G047410.1	-0.0737437	-0.0553457	-0.11443	-0.122387	-0.151403	-0.14815	-0.0645154	-0.0908173	-0.100216	0.298225	0.27418	0.348604	0.636626	0.621941	0.587916	0.105987	0.138903	0.128262	-0.21562	-0.18629	-0.188571	-0.502647	-0.580977	-0.545529	-0.705261	negative	1256
Cla97C02G047520	Cla97C02G047520.1	-0.00391281	0.00989299	-0.0445548	-0.541122	-0.631104	-0.462767	-0.168645	-0.189529	-0.232226	0.732128	0.754168	0.777671	-0.431113	-0.402092	-0.42934	0.149804	0.199374	0.160447	0.105271	0.0793888	0.0942651	0.168815	0.139805	0.165376	0.0275123	positive	1258
Cla97C02G047560	Cla97C02G047560.1	0.0855625	0.0678102	0.103099	0.0160551	-0.0750618	0.00318019	-0.0243835	0.0372612	0.0117762	-0.127585	0.0189006	-0.116614	1.00434	0.987829	1.00465	-0.108361	0.0333322	-0.137341	-0.246343	-0.433418	-0.340969	-0.59106	-0.570133	-0.602521	0.718002	positive	1259
Cla97C02G047680	Cla97C02G047680.1	-0.0453404	-0.027584	0.0882326	0.111122	0.15195	0.127064	0.0922984	0.117786	0.0286601	-0.139145	-0.227601	-0.277443	1.07934	1.06299	1.0718	0.448996	0.417404	0.50204	-0.437211	-0.376565	-0.373651	-1.10647	-1.10848	-1.1802	0.59416	positive	1263
Cla97C02G047700	Cla97C02G047700.1	-0.296363	-0.0386619	-0.180476	0.0533339	-0.125846	-0.00782451	0.114676	-0.00347249	0.0365256	0.146356	0.161939	0.139813	0.119225	0.0971587	0.244698	-0.0438772	-0.217089	-0.346257	-0.201576	-0.0879893	-0.260579	0.156695	0.271472	0.268118	0.0476399	positive	1264
Cla97C02G047720	Cla97C02G047720.1	0.211882	0.239665	0.328592	0.321181	0.193058	0.222529	0.297458	0.282271	0.222529	-0.680058	-0.748589	-0.890519	0.182013	0.286119	0.271686	0.02337	0.1133	-0.0203312	-0.184364	-0.162078	-0.102529	-0.0853897	-0.151999	-0.169797	0.46784	positive	1265
Cla97C02G047790	Cla97C02G047790.1	0.973117	1.2849	1.2815	-0.138994	-0.24675	-0.294645	-0.0923932	-0.568678	-0.525176	-0.363209	-0.721226	-0.588441	3.85969	3.89872	3.929	-0.256034	0.193899	-0.247657	-1.79886	-1.85967	-1.84732	-1.96929	-1.97574	-1.92673	0.960834	positive	1266
Cla97C02G047810	Cla97C02G047810.1	0.0316723	-0.0620993	0.0330902	-0.261464	-0.146254	-0.172162	0.125048	0.081858	-0.105122	0.100913	0.136965	0.237556	0.177891	0.199136	0.242494	-0.307162	-0.27663	-0.342052	0.0597483	-0.0221003	0.0325187	0.0672978	0.0334346	0.135424	0.686332	positive	1268
Cla97C02G047870	Cla97C02G047870.1	0.475	0.529251	0.470741	0.0631484	0.0744195	0.031691	-0.0716702	-0.167993	-0.127074	-0.42143	-0.471773	-0.384311	0.629322	0.608744	0.632006	0.0447872	0.0218727	0.050863	-0.17466	-0.196099	-0.179622	-0.481087	-0.492158	-0.46397	0.992556	positive	1269
Cla97C02G047880	Cla97C02G047880.1	0.00530614	0.00385983	-0.00484861	0.0367636	-0.0283315	-0.0165423	0.0976926	0.0840693	0.0310948	-0.113669	-0.0461979	-0.0491972	-0.631652	-0.565552	-0.52361	-0.161335	0.0409166	-0.0293757	0.255038	0.260699	0.255691	0.329351	0.402774	0.367056	-0.117065	negative	1270
Cla97C02G047890	Cla97C02G047890.1	0.180767	0.182048	0.28695	-0.24714	-0.160185	-0.23171	-0.208031	-0.235125	-0.315979	0.232365	0.272594	0.243448	0.0749046	0.0508337	0.0613903	-0.0444167	0.0213988	0.00765624	-0.117135	-0.139357	-0.129163	0.0590281	0.0885281	0.0663322	0.852901	positive	1271
Cla97C02G047930	Cla97C02G047930.1	1.31857	0.872274	1.21764	-0.794666	-0.380356	-0.854045	-0.835973	-0.424682	-0.893994	0.225552	0.287311	0.262365	0.314258	0.420245	0.236096	-0.472902	-0.602235	-0.55555	-0.0622852	-0.132927	-0.139042	0.380299	0.274338	0.339707	0.766682	positive	1272
Cla97C02G048000	Cla97C02G048000.1	-0.343975	-0.422287	-0.338408	0.029092	0.0348227	-0.0521041	0.0964019	0.0462162	-0.0295027	0.254557	0.317032	0.408156	-0.196286	-0.148778	-0.146131	-0.055047	-0.0970441	-0.142812	0.204173	0.237731	0.220547	0.0331195	0.0133057	0.0772209	0.554221	positive	1275
Cla97C02G048010	Cla97C02G048010.1	1.62377	1.30419	1.56503	-0.419154	-0.314142	-0.329983	-0.53766	-0.23531	-0.414321	-0.969437	-0.314142	-0.958842	3.58068	3.72055	3.47036	-1.72232	-1.92745	-1.61485	-1.07644	-1.12837	-0.959897	-0.813742	-0.687398	-0.841125	0.927683	positive	1276
Cla97C02G048070	Cla97C02G048070.1	0.204628	0.237824	0.269039	0.322389	0.287449	0.247887	0.0348646	0.0290414	0.0579252	-0.517773	-0.567638	-0.605636	0.334353	0.501855	0.418989	0.140605	0.110689	0.160914	-0.125562	-0.147564	-0.179901	-0.334525	-0.500327	-0.379526	0.852672	positive	1277
Cla97C02G048100	Cla97C02G048100.1	0.364257	0.456647	0.457725	-0.0435186	0.0249813	-0.0208224	-0.0727895	-0.0193219	-0.0496317	-0.27637	-0.417462	-0.403694	0.131071	0.194821	0.136673	-0.0839353	-0.144436	-0.102061	-0.0433364	-0.02106	-0.084637	-0.0365935	-0.0177673	0.0712617	0.559466	positive	1278
Cla97C02G048190	Cla97C02G048190.1	-0.0438833	0.0511132	0.137577	0.112042	0.0525269	0.0623843	-0.170101	-0.185017	-0.168453	0.0623843	0.0368993	0.0525269	-0.111285	-0.00324518	-0.164005	-0.324905	-0.306613	-0.358332	0.0744281	-0.0130846	0.0778007	0.407117	0.380237	0.341888	-0.17325	negative	1281
Cla97C02G048300	Cla97C02G048300.1	-0.0307836	-0.0322656	0.0258569	0.20131	0.188643	0.217612	0.066578	0.0610292	0.0707257	-0.234048	-0.228941	-0.305717	-0.154401	-0.182282	-0.165304	0.0393483	0.0430491	0.0627111	0.0290618	0.069686	0.0402204	0.0742822	0.0696259	0.0740025	-0.0549953	negative	1282
Cla97C02G048350	Cla97C02G048350.1	0.744013	1.02709	0.595369	-0.145669	-0.409724	-0.0857565	-0.103801	-0.606163	-0.108761	-0.417909	-0.301643	-0.18704	0.698673	0.66426	0.654847	-0.181216	-0.122265	-0.24075	-0.230896	-0.155475	-0.173512	-0.308075	-0.261674	-0.343915	0.912966	positive	1283
Cla97C02G048390	Cla97C02G048390.1	-0.156925	-0.229821	-0.0570663	0.0835859	-0.0405781	0.0221259	0.0377381	0.290857	0.129347	-0.0361139	0.00489949	-0.0480494	-0.383675	-0.320013	-0.3195	-0.0205807	0.0189496	0.0151116	0.0699497	0.0736641	0.0494406	0.269114	0.200811	0.346729	0.452034	positive	1284
Cla97C02G048460	Cla97C02G048460.1	-0.00448324	-0.155028	0.0129163	-0.0191449	-0.126173	-0.0610084	0.245362	0.365362	0.250261	-0.212843	-0.104123	-0.191098	-1.04124	-1.06299	-1.07286	0.558396	0.567134	0.610207	0.423481	0.343423	0.462561	0.117034	0.0130414	0.0818099	0.24442	positive	1285
Cla97C02G048540	Cla97C02G048540.1	-0.112996	0.0649042	0.045408	-0.135071	-0.0912545	-0.183542	0.0537958	0.00704758	0.0814081	0.0814081	0.135096	0.0537958	-0.26132	-0.257388	-0.217994	-0.0778594	-0.0687365	-0.0891125	-0.0136726	-0.00751509	0.0336283	0.342729	0.317945	0.299296	0.51224	positive	1286
Cla97C02G048570	Cla97C02G048570.1	0.233015	0.398481	0.56194	-0.113542	-0.0992816	-0.0711762	0.0403704	-0.00469475	-0.0150686	-0.0711762	-0.266253	-0.592614	-0.325941	-0.253656	-0.411702	-0.0879325	-0.0452274	-0.031189	0.298153	0.245076	0.257133	0.0999492	0.105691	0.149645	-0.656205	negative	1287
Cla97C02G048590	Cla97C02G048590.1	0.929257	0.747252	0.935259	0.540051	0.398265	0.543423	-0.411264	-0.214274	-0.417807	-1.23338	-0.560128	-1.25665	0.268754	0.178904	0.146978	0.550428	0.424781	0.543517	-0.00618029	-0.0556853	-0.0881128	-0.637113	-0.651829	-0.674441	0.858441	positive	1289
Cla97C02G048650	Cla97C02G048650.1	-0.137623	-0.06029	-0.129701	-0.0172655	0.02735	-0.0304812	0.183033	0.101917	0.165111	-0.0482924	-0.0754286	0.0216701	-0.467317	-0.479598	-0.409297	-0.187997	-0.176164	-0.140557	0.212064	0.200154	0.23069	0.400804	0.420966	0.39625	0.507032	positive	1291
Cla97C02G048760	Cla97C02G048760.1	-0.08034	0.206593	-0.107307	-0.326501	0.0488532	-0.23444	-0.347151	-0.420853	-0.232692	0.670701	0.245982	0.577156	-0.756711	-0.815681	-0.667982	0.0944251	0.276274	0.126817	0.218236	0.134166	0.259121	0.391945	0.32756	0.41183	0.1673	positive	1293
Cla97C02G048780	Cla97C02G048780.1	0.567573	0.267095	0.203299	-0.0923315	0.0135742	0.0707747	-0.215153	0.00626198	-0.0923315	-0.319704	-0.265596	-0.143462	0.157333	0.322952	0.158177	-0.0770758	-0.157048	-0.180053	-0.262895	-0.0471943	-0.0350571	0.133008	-0.0931756	0.0810289	0.485263	positive	1294
Cla97C02G048860	Cla97C02G048860.1	-1.00906	-1.00269	-0.860572	0.231457	0.217885	0.230105	0.0395835	0.100019	0.0610252	0.66961	0.63224	0.690397	-1.07175	-0.996173	-0.989975	0.556649	0.584371	0.55233	0.29781	0.33396	0.318499	0.119558	0.138627	0.156091	0.841009	positive	1295
Cla97C02G048890	Cla97C02G048890.1	0.457171	0.59277	0.629421	0.134968	0.189058	0.129445	-0.0578743	-0.210578	-0.340572	-0.405225	-0.611676	-0.506909	1.26947	1.27173	1.06929	0.679731	0.437151	0.609216	-0.790007	-0.693198	-0.921568	-1.15264	-0.950191	-0.828978	0.937612	positive	1296
Cla97C02G048960	Cla97C02G048960.1	0.419693	0.458834	0.318109	0.0123498	0.0254455	0.0455831	0.0355494	0.0384233	-0.103249	-0.481286	-0.58141	-0.188042	0.0840674	0.214043	0.0891126	-0.187981	-0.293681	-0.241215	-0.0671931	-0.109437	0.0227841	0.258292	0.0540555	0.177153	-0.090295	negative	1298
Cla97C02G049090	Cla97C02G049090.1	-0.167846	-0.270329	-0.103358	-0.114437	-0.106515	-0.132021	-0.201205	-0.0492019	-0.104935	0.478975	0.389931	0.380943	0.671151	0.612055	0.651189	-0.14391	-0.157182	-0.147225	-0.32466	-0.363861	-0.318795	-0.139937	-0.117365	-0.221461	-0.330387	negative	1299
Cla97C02G049140	Cla97C02G049140.1	0.0132184	-0.0338462	0.0103214	0.0782921	0.0517687	0.0132184	-0.0518989	0.101617	0.143204	-0.107453	-0.0855939	-0.132848	0.137791	0.264964	0.116695	-0.00792999	0.055071	-0.018698	-0.0484893	-0.111757	-0.0348498	-0.143699	-0.130204	-0.0788936	0.166729	positive	1300
Cla97C02G049190	Cla97C02G049190.1	0.379251	0.51	0.439558	-0.0723609	-0.141036	-0.108687	-0.0833201	-0.102303	-0.107088	-0.258559	-0.296314	-0.159142	0.581756	0.617325	0.673102	-0.506788	-0.506368	-0.53632	-0.226862	-0.214711	-0.158479	0.0454739	0.107262	0.124608	0.741287	positive	1301
Cla97C02G049340	Cla97C02G049340.1	0.0814618	0.0896745	0.220088	0.153745	0.210078	0.0773378	-0.0312727	-0.0567283	0.00825569	-0.187901	-0.245279	-0.319461	-0.10549	-0.00924275	0.0699851	0.112099	0.222991	0.133873	0.0953965	0.111641	0.116601	-0.248823	-0.219237	-0.279794	0.796108	positive	1304
Cla97C02G049430	Cla97C02G049430.1	0.34056	0.433236	0.440787	-0.185094	-0.19175	-0.162037	0.00443469	-0.0146159	-0.0444247	-0.121758	-0.263558	-0.23578	0.711271	0.699359	0.746	-0.514797	-0.573306	-0.628262	-0.20369	-0.195408	-0.0738572	-0.0229948	0.0277062	0.0279776	0.844377	positive	1305
Cla97C02G049460	Cla97C02G049460.1	-0.125905	-0.146687	-0.012994	-0.0307141	0.44577	-0.0159323	-0.0366695	-0.0652984	-0.0247832	0.215883	-0.301197	0.0985264	-0.584909	-0.575579	-0.604489	-0.0682618	0.0183259	0.00715014	0.377483	0.441963	0.420624	0.193515	0.2112	0.162978	0.145183	positive	1306
Cla97C02G049510	Cla97C02G049510.1	-0.3173	-0.31368	-0.352154	0.238368	0.261608	0.256747	0.0133018	-0.0172866	-0.0217098	0.100001	0.0781212	0.0739815	1.26994	1.28228	1.28091	0.304824	0.338737	0.295941	-0.689877	-0.813863	-0.673662	-0.799538	-0.927671	-0.868022	-0.552116	negative	1307
Cla97C02G049520	Cla97C02G049520.1	0.687801	0.585968	0.879619	-0.519232	-0.387892	-0.60465	-0.204744	-0.16152	-0.278559	0.0650032	0.0895418	-0.151336	3.71259	3.65902	3.63618	-0.437815	-0.548115	-0.249444	-1.46151	-1.49033	-1.53872	-1.78959	-1.78959	-1.70268	0.781865	positive	1308
Cla97C02G049640	Cla97C02G049640.1	0.324709	0.358546	0.401717	-0.139157	-0.140786	-0.153887	-0.408719	-0.474992	-0.408719	0.242108	0.192508	0.206671	1.45085	1.48251	1.42729	0.737747	0.676456	0.823624	-0.776711	-0.762154	-0.770666	-1.50036	-1.49354	-1.29505	0.30902	positive	1309
Cla97C02G049760	Cla97C02G049760.1	0.567636	0.534072	0.512299	-0.041148	-0.131296	-0.0752778	-0.227455	-0.192981	-0.230949	-0.282574	-0.218759	-0.213566	0.305975	0.312859	0.280804	-0.356794	-0.323659	-0.273265	-0.0886075	-0.296206	-0.139028	0.142315	0.223886	0.21172	0.543731	positive	1310
Cla97C02G049790	Cla97C02G049790.1	0.718692	0.75886	0.753322	0.128985	-0.000698985	0.0163562	-0.176289	-0.176289	-0.105816	-0.554801	-0.758612	-0.60371	2.3187	2.37422	2.323	0.143775	0.0690805	0.0961045	-0.889697	-0.965744	-0.846115	-1.57677	-1.46142	-1.58513	0.973199	positive	1311
Cla97C02G049870	Cla97C02G049870.1	0.303738	0.320226	0.574058	-0.253074	-0.198368	-0.382411	0.0590638	-0.105783	-0.205094	0.0335789	-0.0306813	-0.115253	-4.24894	-4.16873	-4.30138	0.595022	0.472584	0.556573	1.86324	1.85608	1.78368	1.80176	1.91355	1.87656	-0.778835	negative	1312
Cla97C02G049940	Cla97C02G049940.1	-0.352105	-0.200659	-0.116248	0.22976	0.104116	0.168952	0.140202	0.195872	0.0447149	-0.0379962	-0.109955	-0.066655	6.07941	6.03805	6.08724	-1.18121	-1.51084	-1.42919	-2.40867	-2.27792	-2.26205	-2.47415	-2.20471	-2.45596	-0.709643	negative	1313
Cla97C02G050030	Cla97C02G050030.1	0.055466	0.00362703	0.18135	-0.1641	-0.207568	-0.0887006	-0.16081	-0.178999	-0.0274955	0.320856	0.265684	0.000691742	0.0265838	0.0887847	0.114377	-0.109702	0.107137	-0.0718856	0.0903413	0.0131529	0.0236296	-0.0666342	-0.0728615	-0.142922	-0.191518	negative	1315
Cla97C02G050040	Cla97C02G050040.1	0.137904	0.275286	0.424982	0.0639732	-0.0303542	0.113679	-0.0869377	-0.140966	-0.285611	-0.140966	-0.0560768	-0.274911	1.77963	1.72356	1.76019	0.227188	0.415936	0.32799	-0.588893	-0.568648	-0.536585	-1.43583	-1.55323	-1.55131	0.849227	positive	1316
Cla97C02G050100	Cla97C02G050100.1	-0.516174	-0.727903	-0.638983	-0.144594	-0.136345	-0.214074	0.283209	0.303967	0.339887	0.40915	0.487033	0.554827	-1.09688	-1.22769	-1.11152	-0.0079398	-0.0507924	-0.0259227	0.416798	0.380918	0.361854	0.79808	0.775109	0.787985	0.972496	positive	1317
Cla97C02G050120	Cla97C02G050120.1	0.0132454	-0.0410363	-0.0246841	-0.0187835	0.00458052	-0.0291254	-0.0666782	-0.0682008	-0.0545546	0.133367	0.0766243	0.0752457	0.364002	0.396971	0.478362	-0.0210736	0.0887282	0.0311003	-0.231779	-0.221636	-0.20062	-0.211305	-0.200196	-0.272554	-0.23721	negative	1318
Cla97C02G050130	Cla97C02G050130.1	-0.0127454	0.0177506	0.0560357	0.023487	0.0263466	0.0433865	0.0754943	0.0574343	0.0105479	-0.0574606	-0.128834	-0.111443	0.449241	0.492057	0.454096	-0.0696355	-0.106473	-0.144112	-0.149106	-0.24638	-0.228824	-0.200602	-0.124062	-0.126198	0.151858	positive	1319
Cla97C02G050280	Cla97C02G050280.1	0.145842	0.114728	0.160489	0.191938	0.191938	0.200984	-0.420505	-0.383335	-0.422488	0.129692	0.0561191	0.0345966	0.724564	0.690783	0.758451	0.168643	0.19945	0.153361	-0.234819	-0.332295	-0.303698	-0.661798	-0.635407	-0.527236	0.427189	positive	1322
Cla97C02G050290	Cla97C02G050290.1	0.310566	0.513789	0.219265	-0.117506	-0.0163838	0.035925	-0.055378	-0.152852	-0.0342502	-0.101721	-0.43389	-0.167565	1.33202	1.15118	1.22123	-0.633539	-0.886226	-0.964786	-0.580281	-0.729286	-0.446628	-0.0161804	0.331383	0.22111	0.563379	positive	1323
Cla97C02G050300	Cla97C02G050300.1	-0.0455863	-0.144801	-0.00861103	-0.0262409	-0.0129983	0.0486463	0.0317064	-0.0129983	0.00447144	0.0203017	0.115824	0.0302858	-0.171049	-0.226866	-0.22769	0.00856504	0.0810002	0.0507568	0.0726482	-0.025433	-0.0068205	0.147164	0.143655	0.154069	0.743583	positive	1324
Cla97C02G050330	Cla97C02G050330.1	0.558265	0.554221	0.636851	-0.169309	-0.182745	-0.222086	-0.107142	-0.159313	-0.172656	-0.266101	-0.18951	-0.280474	-0.278324	-0.336243	-0.326979	-0.407259	-0.694242	-0.455038	0.240433	0.215752	0.122207	0.580878	0.651561	0.687254	-0.431732	negative	1325
Cla97C02G050340	Cla97C02G050340.1	0.154891	0.134058	0.191902	0.0586758	0.0751639	0.0517497	-0.131602	-0.166714	-0.0608376	-0.115921	-0.0518581	-0.139507	0.0656067	0.0812015	-0.0312494	-0.435545	-0.466647	-0.303123	0.0323962	-0.0538746	0.0342626	0.381063	0.327242	0.368667	-0.430362	negative	1326
Cla97C02G050380	Cla97C02G050380.1	0.265903	0.347814	0.189552	-0.0845017	-0.108401	-0.116456	-0.40722	-0.597045	-0.35673	0.314647	0.298985	0.253455	1.34656	1.40867	1.39711	-0.253342	-0.197204	-0.157623	-0.597795	-0.662184	-0.549889	-0.618251	-0.561186	-0.55486	0.494481	positive	1327
Cla97C02G050390	Cla97C02G050390.1	0.00192931	0.0859936	0.0914275	0.064051	-0.0257456	-0.0494698	-0.126227	-0.0705534	-0.129384	0.0612846	0.013425	0.0832689	-0.269471	-0.2703	-0.317621	-0.135707	-0.0489828	-0.131758	0.123287	0.103013	0.0543644	0.356149	0.261236	0.27579	-0.172575	negative	1328
Cla97C02G050400	Cla97C02G050400.1	0.0299678	0.0256245	0.191193	-0.423153	-0.307219	-0.70411	0.0585936	0.0935952	0.0755004	0.354784	0.246981	0.358242	-0.174759	-0.19165	-0.314969	-0.332554	-0.318568	-0.344383	0.167637	0.103454	0.0608255	0.436268	0.451411	0.457288	0.757585	positive	1329
Cla97C02G050420	Cla97C02G050420.1	0.440872	-0.0533125	0.25354	-0.113019	0.106915	-0.0280405	-0.0192256	0.0126424	-0.136657	-0.163924	-0.186773	-0.113019	-0.876311	-0.878564	-0.948974	0.00681182	-0.0502042	-0.0612534	0.464807	0.333991	0.411676	0.53372	0.510398	0.553902	-0.74159	negative	1330
Cla97C02G050450	Cla97C02G050450.1	-0.116141	-0.169611	-0.0569296	-0.0569296	-0.026715	0.0923229	0.155615	0.585399	0.269571	0.100559	-0.519035	-0.258106	-0.274211	-0.264684	-0.319941	0.289925	0.296107	0.285329	-0.0303885	-0.0720888	-0.058711	0.0558502	0.00597788	0.0868356	0.0214562	positive	1331
Cla97C02G050470	Cla97C02G050470.1	0.413786	0.427165	0.370581	-0.202886	-0.158908	-0.106559	-0.28232	-0.228881	-0.262495	0.0326956	0.039971	-0.0421497	0.203609	0.239653	0.277235	0.00832523	0.056836	0.0117125	-0.084475	-0.131333	-0.0535672	-0.15955	-0.212293	-0.156153	0.700257	positive	1332
Cla97C02G050480	Cla97C02G050480.1	0.212665	0.0694704	-0.0725006	0.392792	0.0902289	0.0413193	-0.0633016	0.00242254	0.149452	-0.626273	-0.146663	-0.0496123	-0.0923435	-0.111711	-0.0893287	0.0713077	0.05067	0.063445	0.0355059	0.0436106	0.00171219	0.0322819	-0.0094229	0.0042725	-0.0385577	negative	1333
Cla97C02G050530	Cla97C02G050530.1	-0.146624	-0.0504083	0.0327209	0.167904	0.11132	0.184582	0.0691051	0.11132	0.018479	-0.118023	-0.156285	-0.224091	0.195994	0.18421	0.241236	-0.0997378	-0.0868092	-0.191938	-0.0841155	-0.042723	-0.157687	-0.0123056	0.0158018	0.0380737	-0.539809	negative	1335
Cla97C02G050560	Cla97C02G050560.1	-0.0561116	0.103559	0.128976	0.269129	0.0954392	-0.0381338	-0.336435	-0.0727903	-0.0697434	0.0859075	-0.109864	6.60495e-05	-0.0677508	-0.0916571	0.145395	0.297248	0.380258	0.338582	-0.08034	-0.128532	-0.157616	-0.215335	-0.262454	-0.157797	0.455732	positive	1337
Cla97C02G050590	Cla97C02G050590.1	-0.130299	-6.66438e-05	-0.0230278	-0.348819	-0.258855	-0.320098	-0.402002	-0.184491	-0.382075	0.79465	0.601004	0.654079	-0.0987303	-0.098782	-0.00229471	-0.144019	-0.0948173	-0.0919477	-0.0448181	-0.0206555	0.000559969	0.211625	0.209461	0.174419	0.897734	positive	1338
Cla97C02G050600	Cla97C02G050600.1	-0.289991	-0.207134	-0.139943	-0.182187	-0.135148	-0.00404189	-0.128778	-0.0696302	-0.0172173	0.539529	0.48658	0.147961	0.354905	0.333846	0.425982	-0.130016	-0.209444	-0.16572	0.0168693	-0.0429814	-0.0104283	-0.198532	-0.171963	-0.202517	-0.577626	negative	1339
Cla97C02G050620	Cla97C02G050620.1	-0.170184	-0.0356983	0.0278408	-0.178499	-0.0911341	-0.137394	0.168233	0.0564666	0.0873126	0.242364	-0.00579679	0.0364884	-1.3263	-1.26084	-1.29156	-0.796072	-0.694309	-0.607263	0.765634	0.804482	0.881361	1.14773	1.21214	1.165	0.703243	positive	1340
Cla97C02G050640	Cla97C02G050640.1	1.44771	0.991903	1.35985	0.0362447	0.149265	0.0873919	-0.874219	-0.220422	-0.674096	-1.07002	-0.288205	-0.945398	2.26099	2.29806	2.2155	-0.767364	-0.727158	-0.828891	-0.62313	-0.608056	-0.635759	-0.885618	-0.8571	-0.84147	0.875614	positive	1341
Cla97C02G050660	Cla97C02G050660.1	0.160406	0.0981596	0.188644	-0.206615	-0.165416	0.0145825	-0.00854741	-0.0910096	-0.150868	0.0527924	0.157811	-0.049939	-0.044058	-0.00141449	-0.0370551	-0.25614	-0.133382	-0.149682	0.0882569	0.000633995	0.0643827	0.123232	0.149124	0.196101	0.342139	positive	1342
Cla97C02G050700	Cla97C02G050700.1	0.609254	0.438588	0.572247	-0.561412	-0.122127	-0.541543	-0.604279	-0.331734	-0.464695	0.502718	0.149081	0.353901	-0.297911	-0.367892	-0.437132	-0.143748	-0.184222	-0.192973	0.154217	0.169404	0.148625	0.387327	0.395981	0.368325	-0.134464	negative	1344
Cla97C02G050710	Cla97C02G050710.1	0.0209619	0.114509	0.0390568	-0.028914	-0.0202404	0.0279484	-0.0187999	-0.0187999	0.00263728	-0.0464191	-0.0745773	0.00263728	0.607094	0.582451	0.606664	0.0303275	0.142056	0.109426	-0.284206	-0.269239	-0.27572	-0.439442	-0.436079	-0.373333	0.752418	positive	1345
Cla97C03G050800	Cla97C03G050800.1	-0.0815667	-0.0131076	-0.169906	0.304356	0.176004	0.0322317	0.322131	0.299579	0.330351	-0.616763	-0.452619	-0.130691	0.118795	0.0797023	0.0995534	0.250456	0.215035	0.245592	-0.0436938	-0.054211	-0.0506515	-0.257431	-0.282079	-0.321067	0.53904	positive	1347
Cla97C03G050830	Cla97C03G050830.1	-0.105014	-0.0212692	-0.140869	-0.00107111	-0.12361	-0.00969282	0.0998965	0.145909	0.038496	0.0146028	-0.00393929	0.10656	-0.717901	-0.722655	-0.775752	0.188311	0.104471	0.172355	0.371085	0.346721	0.37053	0.218832	0.215655	0.228347	0.692375	positive	1348
Cla97C03G050880	Cla97C03G050880.1	0.312699	0.474288	0.446419	-0.0468214	-0.0605979	-0.0422583	-0.302865	-0.141252	-0.167513	-0.0683087	-0.194261	-0.209528	0.026368	0.0114147	0.0164463	-0.202472	-0.190725	-0.152811	-0.0653999	-0.149056	-0.0552912	0.240621	0.247851	0.273054	-0.0467481	negative	1349
Cla97C03G050910	Cla97C03G050910.1	-0.0489381	-0.0294925	0.0215946	-0.0610362	-0.0504448	-0.0294925	0.135968	0.157011	0.119983	-0.0701769	-0.0793758	-0.0655993	0.440112	0.538304	0.471865	0.627491	0.6453	0.654712	-0.277434	-0.346694	-0.288894	-0.842082	-0.829878	-0.7928	-0.112539	negative	1350
Cla97C03G050970	Cla97C03G050970.1	-0.0141595	0.063843	0.122019	0.0132663	-0.0495648	-0.107463	0.0898382	0.0569236	0.052756	0.0203977	-0.112135	-0.135721	0.215369	0.267786	0.313464	-0.395739	-0.313014	-0.402581	-0.180193	-0.186757	-0.162908	0.275835	0.261859	0.30688	0.0181973	positive	1351
Cla97C03G051020	Cla97C03G051020.1	0.455534	0.447926	0.417089	-0.156232	-0.174568	-0.151272	-0.152923	-0.259203	-0.166205	-0.0741382	-0.0462442	-0.139763	0.00563708	-0.00928879	0.00782957	0.0871385	0.0852995	0.0817132	0.00991932	0.028166	0.0402371	-0.146835	-0.0808928	-0.108924	-0.109278	negative	1353
Cla97C03G051090	Cla97C03G051090.1	0.275639	0.281678	0.267142	0.117167	0.0323186	0.127933	0.0337505	0.0366102	0.0106669	-0.360447	-0.423893	-0.398565	-0.269579	-0.362316	-0.375084	-0.039492	-0.0350603	-0.0972813	0.0127389	0.0770382	0.011538	0.396772	0.300661	0.380065	-0.961353	negative	1354
Cla97C03G051110	Cla97C03G051110.1	0.397416	0.406226	0.474837	0.330722	0.0194564	0.116598	-0.0541665	-0.0770065	-0.190311	-0.51058	-0.32599	-0.587201	-0.160587	-0.085813	-0.161653	-0.315266	-0.1346	-0.235858	0.0874049	0.104488	0.0734221	0.262341	0.28856	0.277561	-0.873621	negative	1355
Cla97C03G051120	Cla97C03G051120.1	-0.13393	-0.129129	-0.0912861	0.0367069	0.0677035	0.032428	0.114335	0.103497	0.0565089	-0.00226776	0.0166293	-0.0711947	0.157483	0.139701	0.107535	0.374112	0.342139	0.384722	0.0321489	-0.0105121	-0.00358174	-0.52382	-0.491584	-0.508344	0.100383	positive	1356
Cla97C03G051140	Cla97C03G051140.1	-0.670863	-0.848689	-0.685485	0.0327444	0.0282709	0.09681	0.376834	0.416172	0.430934	0.293544	0.335186	0.194541	-0.731804	-0.738173	-0.759044	0.777905	0.868656	0.830481	0.0962615	0.133198	0.17825	-0.190116	-0.240727	-0.224889	0.574767	positive	1357
Cla97C03G051150	Cla97C03G051150.1	-0.103747	0.000154133	-0.0576503	0.101142	0.0654842	0.0599193	0.102496	0.0779272	0.0875315	-0.0713253	-0.207303	-0.054629	-0.446565	-0.245793	-0.25455	0.405073	0.443998	0.425451	0.110803	0.0780876	0.165586	-0.17733	-0.269137	-0.235624	0.794681	positive	1358
Cla97C03G051200	Cla97C03G051200.1	0.561275	0.305755	0.444694	-0.14082	-0.124351	-0.083982	-0.174334	-0.0478145	-0.154133	-0.263493	-0.201717	-0.12108	0.707152	0.723733	0.629289	0.267309	0.234155	0.36496	-0.266646	-0.386973	-0.366063	-0.68658	-0.580285	-0.64005	0.789836	positive	1361
Cla97C03G051240	Cla97C03G051240.1	0.449455	0.311309	0.276716	0.0553289	0.0651479	0.0735114	-0.16636	0.0153704	0.0749006	-0.395333	-0.327694	-0.432352	-0.223079	-0.218441	-0.158524	-0.118545	-0.130522	-0.115103	0.133328	0.0498207	0.0971435	0.209503	0.263855	0.210563	-0.917339	negative	1362
Cla97C03G051380	Cla97C03G051380.1	0.270512	0.271715	0.236422	-0.156204	-0.0790527	-0.14012	-0.19888	-0.220702	-0.179026	0.0400759	0.0913833	0.0638764	0.00933477	0.0174938	-0.0581021	-0.161132	-0.22297	-0.144725	0.0251221	0.0273893	0.0132902	0.199024	0.163327	0.131948	0.277848	positive	1364
Cla97C03G051400	Cla97C03G051400.1	0.342747	0.231485	0.465204	-0.0520918	-0.0551226	-0.137853	-0.23934	-0.26543	-0.342945	0.0188021	0.0655963	-0.0310521	0.708368	0.730965	0.658967	-0.233503	-0.246031	-0.245214	-0.191514	-0.234948	-0.185564	-0.232936	-0.260824	-0.267765	0.820404	positive	1365
Cla97C03G051430	Cla97C03G051430.1	0.395558	0.67441	0.342966	-0.183802	-0.280943	-0.152276	-0.135955	-0.094367	0.00317017	-0.0176098	-0.43614	-0.115011	1.95088	1.95515	1.85495	-1.09084	-1.17325	-0.93353	-0.516186	-0.486193	-0.586713	-0.293019	-0.196371	-0.484889	0.881815	positive	1366
Cla97C03G051440	Cla97C03G051440.1	0.0328349	0.0500271	-0.00957886	0.328878	0.193603	0.159686	0.188437	0.174133	0.100408	-0.503939	-0.297767	-0.416722	0.206869	0.261622	0.185634	0.000320601	0.052277	0.042455	-0.103664	-0.173149	-0.0972265	-0.00514334	-0.30124	-0.0687547	0.202774	positive	1367
Cla97C03G051710	Cla97C03G051710.1	0.132424	0.589926	0.12977	-0.0421492	-0.17204	-0.0169292	0.000611398	-0.210205	0.0866206	-0.0541717	-0.268538	-0.175319	-0.16464	-0.15871	-0.237825	0.0866057	0.123612	0.122808	-0.0170813	-0.0538229	-0.01	0.111938	0.0712003	0.125915	-0.648869	negative	1370
Cla97C03G051730	Cla97C03G051730.1	0.172996	0.153596	0.170424	-0.0820957	0.0398534	0.0171333	0.0468807	0.048282	-0.0457615	-0.135188	-0.24934	-0.136779	-0.101838	-0.111043	-0.141998	-0.021564	0.111398	0.0786417	0.0968381	0.215526	0.0298778	-0.0303492	-0.0824285	-0.0430621	-0.0452541	negative	1371
Cla97C03G051740	Cla97C03G051740.1	-0.625049	-0.625049	-0.759574	0.152176	0.0394841	0.152176	0.292354	0.222693	0.170792	0.325962	0.281382	0.372655	-1.19007	-1.09375	-1.15715	0.251592	0.308155	0.28679	0.286157	0.254132	0.249924	0.634359	0.572403	0.597449	0.984284	positive	1372
Cla97C03G051770	Cla97C03G051770.1	0.839297	0.687764	0.637071	-0.268725	-0.245207	-0.163244	-0.197555	-0.222067	-0.27055	-0.501796	-0.17516	-0.119826	-0.152266	-0.243	-0.151441	-0.711335	-0.888031	-0.793805	-0.0594972	0.108469	0.0315958	0.971205	0.938215	0.949891	-0.197278	negative	1373
Cla97C03G051820	Cla97C03G051820.1	-0.368267	-0.278356	-0.222526	-0.0305225	-0.0608006	-0.00969978	0.0790654	-0.0245425	0.0267523	0.298877	0.323701	0.26632	-0.106957	-0.11539	-0.148897	-0.147508	-0.184508	-0.102988	0.0677896	0.0681296	0.0310906	0.212148	0.217399	0.209691	0.84242	positive	1377
Cla97C03G051830	Cla97C03G051830.1	0.495612	0.405949	0.443988	-0.0216244	0.0293081	0.0350161	-0.0171876	-0.143659	-0.063706	-0.373863	-0.37765	-0.412184	0.121056	-0.0287249	0.276184	0.017391	0.028386	0.09079	-0.0358718	0.0581692	0.0330569	-0.220731	-0.159866	-0.179839	0.792355	positive	1378
Cla97C03G051860	Cla97C03G051860.1	-0.192074	-0.134785	-0.0874272	0.00577925	0.00868791	0.00286471	0.0303179	0.015934	0.015934	0.145795	0.119127	0.0698463	0.389611	0.476189	0.49721	-0.129085	-0.030315	-0.11258	-0.287177	-0.275219	-0.131073	-0.10774	-0.158404	-0.131417	-0.797798	negative	1379
Cla97C03G051910	Cla97C03G051910.1	0.99698	0.440994	0.85886	-0.306199	-0.0651913	-0.177188	-0.321486	-0.283568	-0.300508	-0.605029	0.172968	-0.410631	-0.224935	-0.42281	-0.260754	0.138731	0.300917	0.100031	0.0506583	0.176985	0.141147	0.00235061	0.104093	-0.106414	-0.638753	negative	1380
Cla97C03G051930	Cla97C03G051930.1	-0.70803	-1.11688	-0.972659	-0.377096	-0.635491	-0.406976	0.602696	0.712974	0.668641	0.685932	0.819109	0.727781	-1.48619	-1.70349	-1.83465	1.1393	1.11215	1.11058	0.315925	0.272436	0.182922	0.237498	0.357101	0.296414	0.479865	positive	1382
Cla97C03G051940	Cla97C03G051940.1	0.00076834	-0.351813	-0.00655872	-0.199624	-0.192921	-0.0835006	0.253534	0.345033	0.141325	-0.0959511	0.171505	0.0182029	-1.14104	-0.961495	-1.06816	0.367944	0.27438	0.267041	0.28738	0.437632	0.389728	0.374944	0.430874	0.340772	0.363797	positive	1383
Cla97C03G052090	Cla97C03G052090.1	-0.185038	-0.496698	-0.373215	0.102518	0.163356	0.205472	0.163356	0.151653	0.0957483	0.00182435	0.130611	0.0404129	-1.94169	-1.92128	-1.9677	0.568689	0.49458	0.537412	0.812671	0.879083	0.823326	0.570842	0.567318	0.576742	0.922857	positive	1386
Cla97C03G052150	Cla97C03G052150.1	0.757187	0.115215	0.252467	-0.242813	-0.608428	-0.46491	0.00446045	0.30318	0.225785	-0.688338	0.244893	0.101303	0.171406	-0.00442983	0.0977789	-0.050811	-0.0820685	-0.044366	0.0375387	0.107767	0.0296359	-0.0780269	-0.0526793	-0.131745	0.717862	positive	1388
Cla97C03G052170	Cla97C03G052170.1	-0.499671	-0.47065	-0.179838	-0.205223	-0.120676	-0.154892	0.123178	0.0130168	0.0929491	0.528324	0.540593	0.332889	-0.745787	-0.80059	-0.799163	-0.172846	-0.0542776	-0.181639	0.557023	0.536585	0.557219	0.346856	0.376866	0.379753	0.787342	positive	1389
Cla97C03G052190	Cla97C03G052190.1	-0.0119095	-0.0578544	-0.0309989	-0.0608694	-0.0518431	-0.0503442	-0.0533436	-0.000286528	0.0112436	0.116415	0.0908318	0.0989597	0.414194	0.358174	0.441853	-0.171365	-0.173769	-0.126441	-0.0826877	-0.113806	-0.121564	-0.162183	-0.157476	-0.10493	-0.302109	negative	1390
Cla97C03G052260	Cla97C03G052260.1	0.58201	0.132303	-0.0213503	0.299076	0.31224	0.168289	-0.466219	-0.0733174	-0.0562988	-0.621404	-0.298566	0.0432369	-1.61632	-1.7126	-1.53807	1.15352	1.21442	1.18589	0.392932	0.366516	0.363139	0.0612345	0.0456695	0.0836717	-0.122284	negative	1391
Cla97C03G052270	Cla97C03G052270.1	1.11419	1.36055	1.34127	-0.205393	-0.557944	-0.431374	-0.176364	-0.492078	-0.399714	-0.353491	-0.616526	-0.583123	1.461	1.52181	1.52295	-0.829048	-1.0721	-0.974387	-0.489916	-0.234253	-0.284399	-0.169776	-0.384788	-0.0670895	0.920403	positive	1392
Cla97C03G052310	Cla97C03G052310.1	0.264763	0.211621	0.210362	0.00342612	0.0576584	0.0336483	-0.11788	-0.0589865	-0.145026	-0.148254	-0.103713	-0.207619	0.537765	0.569068	0.543525	-0.323504	-0.219237	-0.259538	-0.206812	-0.169557	-0.175903	-0.0507806	-0.121793	-0.123233	0.776836	positive	1394
Cla97C03G052380	Cla97C03G052380.1	-0.552667	0.0978361	-0.665083	0.261778	0.122428	0.443001	0.078415	0.13188	0.0502089	0.204062	-0.260017	0.0881582	1.91372	1.93915	1.90812	0.331158	0.216237	0.310674	-0.289998	-0.304626	-0.299534	-1.96062	-1.88001	-1.88427	-0.396067	negative	1395
Cla97C03G052420	Cla97C03G052420.1	-0.105569	-0.319694	-0.278801	-0.00789986	0.109253	0.137113	0.118599	0.094442	0.155391	-0.00354784	0.0322174	0.068496	-0.327931	-0.398268	-0.316323	0.740791	0.606662	0.677136	0.00978723	0.0761818	0.0382597	-0.397637	-0.345623	-0.363036	0.497516	positive	1397
Cla97C03G052480	Cla97C03G052480.1	-0.0607725	-0.241245	-0.239544	-0.123675	-0.0325272	-0.0972599	0.268045	0.20076	0.17804	0.0166768	0.0251883	0.106314	-0.613941	-0.575223	-0.508112	0.515241	0.509911	0.571607	0.152054	0.142333	0.0908829	-0.118251	-0.104205	-0.0622962	0.312355	positive	1398
Cla97C03G052590	Cla97C03G052590.1	0.0336488	0.092201	0.0646152	0.0107029	-0.0333299	0.0121478	0.0020032	0.000548133	-0.00967861	-0.0468061	-0.0942121	-0.0318403	0.127235	0.127364	0.132716	-0.132858	-0.206701	-0.200949	0.0177711	0.0157082	-0.0781768	-0.0419145	0.0742911	0.165514	0.24992	positive	1400
Cla97C03G052610	Cla97C03G052610.1	0.943231	0.884167	0.797553	-0.0341256	-0.0309196	-0.0309196	-0.348451	-0.282153	-0.276447	-0.646631	-0.486553	-0.488751	0.932411	0.977271	1.01766	0.592026	0.456371	0.601664	-1.02977	-1.05503	-1.07133	-0.54063	-0.43813	-0.44251	0.813386	positive	1401
Cla97C03G052690	Cla97C03G052690.1	0.113246	0.240244	0.166439	-0.014133	0.0267144	-0.0230386	0.060829	0.106457	0.113246	-0.12961	-0.371639	-0.288755	-0.54397	-0.586028	-0.537934	0.0286692	0.0251137	0.0146807	0.239477	0.13053	0.137711	0.319295	0.342763	0.429693	-0.748247	negative	1404
Cla97C03G052710	Cla97C03G052710.1	-0.624769	-0.520432	-1.00184	-0.226053	-0.193591	-0.218776	0.156241	0.207109	0.269241	0.755591	0.616054	0.781224	-3.09133	-3.08485	-3.05359	0.31647	0.388798	0.275053	1.18617	1.12052	1.05233	1.60854	1.62775	1.65415	0.89046	positive	1405
Cla97C03G052750	Cla97C03G052750.1	0.134903	0.00193811	-0.044244	-0.0810416	-0.130005	-0.101373	-0.316695	-0.37262	-0.238404	0.3689	0.425746	0.352895	0.12702	0.127329	0.227096	0.0477334	0.12302	0.061141	-0.0292698	-0.0554742	-0.0483546	-0.199326	-0.20558	-0.175334	-0.475269	negative	1407
Cla97C03G052790	Cla97C03G052790.1	0.156175	0.0385316	-0.120691	-0.0396275	-0.03221	0.141819	0.12732	0.037122	0.00719836	-0.264501	-0.0277778	-0.0233591	-0.640909	-0.641682	-0.704555	-0.157065	0.0176372	-0.174357	0.277527	-0.0914045	0.0385646	0.742379	0.611085	0.722779	-0.38623	negative	1408
Cla97C03G052980	Cla97C03G052980.1	0.566854	0.480759	0.596398	-0.224177	-0.160196	-0.243239	-0.15855	-0.0957792	-0.262558	-0.201968	-0.161844	-0.135701	-1.16791	-1.07984	-1.0976	-0.0458141	-0.103035	0.0198501	0.478024	0.551095	0.543467	0.604769	0.62426	0.67274	-0.89899	negative	1413
Cla97C03G052990	Cla97C03G052990.1	-0.127249	-0.246029	-0.0396929	-0.0396929	0.221353	0.184827	0.200054	0.128907	0.056859	-0.0396929	-0.124085	-0.175558	-0.455038	-0.363301	-0.482175	0.0660256	0.116975	0.0478346	0.166515	0.0889471	0.120069	0.242014	0.19032	0.261813	0.366164	positive	1414
Cla97C03G053010	Cla97C03G053010.1	-0.224698	-0.0772583	-0.130008	0.0716947	0.025625	-0.00882903	0.0675668	0.0948655	0.0537212	0.08673	-0.0352205	0.0758108	0.684164	0.718451	0.716713	0.189298	0.17872	0.195281	-0.245365	-0.252172	-0.20503	-0.662715	-0.651789	-0.665557	-0.72558	negative	1415
Cla97C03G053070	Cla97C03G053070.1	-0.0791548	-0.109884	-0.141283	0.0164228	-0.0195924	0.0221027	-0.0225128	0.0598681	0.159864	0.0667545	0.122016	-0.0746013	-0.0917704	0.150639	0.0410694	-0.393522	-0.119175	-0.215626	-0.317865	-0.0238193	-0.0494463	0.236048	0.366927	0.416541	0.0126959	positive	1416
Cla97C03G053080	Cla97C03G053080.1	-0.157276	-0.0268179	-1.789e-05	-0.25247	-0.129578	-0.183839	0.00440078	0.0175762	0.0620586	0.291499	0.261048	0.113415	0.0624517	0.0668129	0.0629445	-1.063	-1.11369	-1.02588	0.335949	0.351028	0.346313	0.645348	0.599827	0.731901	0.832133	positive	1417
Cla97C03G053090	Cla97C03G053090.1	0.453956	0.578762	0.365474	-0.0724605	-0.194865	-0.0430325	0.0199642	-0.0584461	-0.0445665	-0.347436	-0.44535	-0.212	0.097396	0.250094	0.232679	0.288185	0.392688	0.256234	-0.21695	-0.134992	-0.0917403	-0.374845	-0.484045	-0.214705	0.562752	positive	1418
Cla97C03G053100	Cla97C03G053100.1	-0.275633	-0.349633	-0.0832074	-0.0288166	-0.126976	-0.0694163	0.189546	0.120367	0.112322	0.146863	0.248235	0.11635	-0.475889	-0.427403	-0.573295	-0.111039	-0.179703	-0.122818	0.25473	0.202958	0.246875	0.400548	0.38748	0.397556	0.892717	positive	1419
Cla97C03G053140	Cla97C03G053140.1	0.855249	0.870706	0.928472	-0.162997	-0.205589	-0.191251	-0.545186	-0.533835	-0.575123	-0.15428	-0.130148	-0.156019	0.28706	0.31808	0.289434	-0.107059	-0.13541	-0.149274	-0.109705	-0.150486	-0.141019	-0.0150623	-0.0487351	-0.0378225	0.966035	positive	1421
Cla97C03G053170	Cla97C03G053170.1	-0.68801	-0.776702	-0.668481	-0.0956932	-0.103867	-0.00870985	0.204886	0.15232	0.139913	0.602613	0.679875	0.561856	-1.71025	-1.70353	-1.64428	0.365537	0.352838	0.399372	0.758274	0.737563	0.724852	0.589899	0.551468	0.578262	0.873839	positive	1422
Cla97C03G053180	Cla97C03G053180.1	-0.0777233	-0.192689	-0.276521	0.038698	0.106456	0.0429392	-0.222921	-0.22632	-0.26774	0.311375	0.371065	0.393381	0.605986	0.551101	0.610735	-0.253905	-0.246032	-0.266482	-0.150367	-0.149108	-0.142952	-0.16481	-0.233201	-0.160965	-0.469114	negative	1423
Cla97C03G053200	Cla97C03G053200.1	-0.172938	-0.392865	-0.238564	0.211761	0.0909191	0.206712	0.262518	0.204181	0.210501	-0.229982	-0.00539067	-0.146854	-1.27283	-1.32112	-1.20652	0.0294675	0.122875	0.0498869	0.560517	0.582847	0.545548	0.603593	0.647595	0.658153	0.60067	positive	1424
Cla97C03G053230	Cla97C03G053230.1	0.664053	0.374015	0.417737	-0.653106	-0.5721	-0.301956	-0.428675	-0.146411	-0.175181	0.304618	0.248378	0.268627	-0.923543	-1.06077	-0.98718	0.138658	0.315815	0.169189	-0.0912431	-0.00304	-0.0765314	0.799997	0.823714	0.894936	-0.305268	negative	1425
Cla97C03G053240	Cla97C03G053240.1	-0.0681214	-0.109718	-0.0833881	0.0913039	0.120912	0.155139	0.10349	0.0858546	0.120912	-0.111282	-0.154161	-0.150941	-0.642353	-0.634302	-0.647183	-0.00428369	0.0477719	-0.0257136	0.125394	0.139288	0.113595	0.521064	0.486499	0.520224	-0.00712091	negative	1426
Cla97C03G053310	Cla97C03G053310.1	0.323348	0.34424	0.4336	-0.0987213	-0.0846918	-0.0313936	-0.111308	0.0471597	0.0903949	-0.0815925	-0.284001	-0.547035	0.849653	0.70909	0.693654	-0.479609	-0.388187	-0.452859	-0.226696	-0.294118	-0.286001	-0.0787652	-0.0531982	0.00703617	0.631014	positive	1428
Cla97C03G053650	Cla97C03G053650.1	-0.237982	-0.256864	-0.267268	0.135536	0.127616	0.0954956	-0.0199816	-0.0155898	0.00617068	0.0954956	0.178334	0.159037	-0.355706	-0.33925	-0.283406	0.302851	0.299616	0.296542	0.0993931	0.0536983	0.101863	-0.0530552	-0.0848825	-0.0376636	0.748174	positive	1431
Cla97C03G053800	Cla97C03G053800.1	-0.309537	-0.311362	-0.320522	0.116855	0.0769495	0.130363	0.274817	0.206312	0.157007	-0.0620896	-0.000432996	0.0416395	0.18261	0.164772	0.122261	0.109378	0.223965	0.16108	-0.0264787	-0.0792376	-0.0317009	-0.288101	-0.240382	-0.298166	-0.271126	negative	1432
Cla97C03G053810	Cla97C03G053810.1	-0.288304	-0.235773	-0.359586	0.137836	0.129851	0.153675	0.205252	0.197632	0.221625	-0.0384072	-0.0489434	-0.0748562	-0.689824	-0.601243	-0.709649	0.447883	0.501345	0.418004	0.183886	0.125783	0.0841274	0.128176	0.0323084	0.0792043	0.874715	positive	1433
Cla97C03G053840	Cla97C03G053840.1	1.19485	1.23899	0.977195	-0.224936	-0.277262	-0.187363	-0.494073	-0.569403	-0.315256	-0.41595	-0.576671	-0.350121	2.93893	3.01307	3.03026	-0.496142	0.0322534	-0.356854	-1.94264	-1.78534	-1.77096	-0.955304	-0.794392	-0.912897	0.963548	positive	1434
Cla97C03G053860	Cla97C03G053860.1	0.274426	0.465859	0.276847	-0.0083666	0.143931	0.0337483	-0.00689371	-0.180319	-0.112224	-0.212213	-0.525679	-0.149116	0.00930607	0.0218329	0.0222555	-0.097102	-0.0495885	-0.0461329	-0.0160586	-0.00502157	-0.0262872	0.0696561	0.0305683	0.0865719	-0.190382	negative	1435
Cla97C03G054030	Cla97C03G054030.1	-0.068259	-0.148648	-0.025957	0.123811	0.0926091	0.114386	0.114386	0.153038	0.150405	-0.193093	-0.097687	-0.214991	-0.126182	-0.156717	-0.132824	0.0114102	0.039477	0.00962789	0.106267	0.109395	0.120487	0.0412709	-0.00234588	-0.019867	0.578698	positive	1436
Cla97C03G054070	Cla97C03G054070.1	-0.427657	-0.578524	-0.431755	-0.122607	-0.21848	-0.144302	-0.000393047	-0.0249502	-0.0110854	0.66161	0.701451	0.596693	-1.57512	-1.56582	-1.54431	0.227907	0.281431	0.232092	0.757103	0.723846	0.737451	0.599428	0.552068	0.573921	0.702901	positive	1437
Cla97C03G054150	Cla97C03G054150.1	-0.151811	0.134622	-0.0124079	0.158166	0.0863488	0.0546399	0.0321632	0.0179353	-0.167985	-0.0344791	-0.24653	0.129337	0.318963	0.365029	0.359117	-0.145027	-0.0262158	-0.0889909	-0.28766	-0.144233	-0.109127	0.0322478	-0.127839	-0.146264	-0.0496928	negative	1441
Cla97C03G054160	Cla97C03G054160.1	-0.19775	-0.312677	-0.199399	0.136328	0.138942	0.120547	0.123189	0.215225	0.183929	-0.0342509	-0.117579	-0.0565037	-0.503118	-0.469153	-0.436091	0.124865	0.201354	0.0997915	0.273321	0.201282	0.206228	0.132219	0.066207	0.103094	0.867518	positive	1442
Cla97C03G054210	Cla97C03G054210.1	-1.106	-1.21544	-0.614876	0.577284	0.64902	0.492224	0.999095	1.02255	0.859986	-0.524678	-0.640965	-0.498206	-1.70956	-1.74116	-1.29729	2.01954	0.899367	1.00929	0.206306	1.61578	0.217965	-0.385021	-0.354189	-0.481022	0.854762	positive	1443
Cla97C03G054220	Cla97C03G054220.1	-1.31542	-1.02664	-0.883494	0.630634	0.497067	0.573511	0.708364	0.709346	0.78025	-0.205793	-0.142387	-0.325443	-1.14828	-1.15639	-0.945813	1.08804	0.886843	1.0234	0.196417	0.474777	0.468106	-0.197363	-0.206697	-0.483041	0.925565	positive	1444
Cla97C03G054400	Cla97C03G054400.1	-0.133362	-0.0488797	-0.0836088	0.0195901	-0.0106019	-0.0473886	0.0644153	0.17202	0.155282	-0.0281425	-0.0958871	0.0365632	-0.77171	-0.78226	-0.801288	-0.166231	-0.0518527	-0.0941864	0.285057	0.227097	0.234747	0.648402	0.633124	0.639101	0.433629	positive	1445
Cla97C03G054450	Cla97C03G054450.1	0.300473	0.277447	0.331397	-0.163474	-0.132306	-0.280887	-0.410676	-0.129064	-0.245351	0.107828	0.167051	0.177563	-0.638322	-0.63443	-0.617806	0.137594	0.148866	0.118928	0.25957	0.297051	0.277039	0.229309	0.191272	0.230928	-0.708038	negative	1446
Cla97C03G054520	Cla97C03G054520.1	0.631895	0.664597	0.601418	-0.0774492	-0.06478	0.0720066	0.00448263	-0.0459824	-0.137536	-0.560333	-0.578227	-0.510091	0.364015	0.60307	0.463859	-0.293865	-0.219641	-0.18455	-0.00396544	0.0215531	-0.0670636	-0.230052	-0.252096	-0.201265	0.881757	positive	1449
Cla97C03G054590	Cla97C03G054590.1	-0.365929	-0.369756	-0.271626	-0.0103826	-0.00144952	0.00742864	-0.0997135	-0.0558973	-0.0636247	0.370654	0.419143	0.441153	0.221471	0.270487	0.198808	-0.0594772	-0.0513188	-0.0950783	-0.048343	-0.148113	-0.117877	-0.0465119	-0.085715	-0.038331	-0.641813	negative	1450
Cla97C03G054620	Cla97C03G054620.1	0.263292	0.452261	0.446884	-0.193542	-0.0743227	-0.0650746	0.0126853	-0.135925	-0.00636531	-0.244828	-0.224094	-0.230972	0.176716	0.330859	0.38735	-0.104636	0.00704198	0.084966	-0.230516	-0.0977633	-0.0709078	-0.169925	-0.188569	-0.124614	0.894715	positive	1452
Cla97C03G054650	Cla97C03G054650.1	-0.382038	-0.489692	-0.422954	0.0539776	0.052557	0.0411409	0.182936	0.179035	0.185531	0.185531	0.241466	0.17251	-0.155493	-0.154234	-0.125642	0.497171	0.547914	0.502211	-0.0760903	-0.00739837	-0.00967678	-0.319914	-0.333694	-0.365154	0.0451724	positive	1453
Cla97C03G054660	Cla97C03G054660.1	0.424079	0.569525	0.377882	-0.0144352	0.0138392	-0.00694069	-0.0265081	-0.0963671	-0.0789755	-0.270274	-0.476311	-0.415514	0.927314	0.954945	0.979229	-0.157955	-0.0159531	-0.156382	-0.254335	-0.181283	-0.0843268	-0.647201	-0.720588	-0.643463	0.969231	positive	1454
Cla97C03G054690	Cla97C03G054690.1	-0.433008	-0.197757	-0.396138	0.113445	0.102638	0.151954	0.26046	0.280975	0.352277	-0.0204295	-0.0946633	-0.119754	-1.46985	-1.43258	-1.49855	0.559398	0.498242	0.575546	0.624137	0.666343	0.684473	0.284384	0.276565	0.231888	0.886447	positive	1455
Cla97C03G054720	Cla97C03G054720.1	-0.339401	-0.451174	-0.359945	-0.0196999	-0.00933669	0.0611931	0.20672	0.174616	0.145761	0.15237	0.259096	0.179801	-0.481916	-0.295013	-0.38195	-0.247057	-0.317239	-0.257021	-0.02336	-0.0402004	0.0560561	0.679543	0.704783	0.603375	0.702491	positive	1456
Cla97C03G054750	Cla97C03G054750.1	0.788833	0.696477	0.633897	0.210448	0.279095	0.216061	0.160374	0.184912	0.158917	-1.04753	-1.23395	-1.04753	1.54647	1.63445	1.56028	-0.441209	-0.146781	-0.257918	-0.807917	-0.86469	-0.51737	-0.545424	-0.671056	-0.488831	0.621178	positive	1457
Cla97C03G054840	Cla97C03G054840.1	-0.121441	-0.0113514	-0.0202114	0.0335779	0.0163515	0.0192369	-0.331441	-0.298733	-0.291565	0.356932	0.35465	0.293994	0.249778	0.273578	0.2887	-0.200856	-0.172403	-0.130302	-0.141305	-0.029957	-0.0869913	0.00241881	0.00121607	-0.0538769	0.0327398	positive	1460
Cla97C03G054900	Cla97C03G054900.1	-0.129092	-0.0435741	0.0216518	-0.148096	-0.0376553	-0.0317608	0.109615	0.0145484	0.0202339	0.128162	0.206303	-0.110335	-0.0815513	-0.0103383	-0.124632	-0.0473258	-0.0626781	-0.038589	-0.057611	-0.0785123	0.00367476	0.167409	0.162629	0.167525	0.385471	positive	1463
Cla97C03G054960	Cla97C03G054960.1	0.780627	1.01064	0.830533	-0.0869071	-0.195096	-0.32371	-0.159863	-0.283339	0.0903524	-0.387486	-0.712984	-0.56277	-0.122442	-0.139976	-0.109598	-0.182292	-0.239368	-0.154933	0.147102	0.208811	0.181105	0.0362279	0.205764	0.169599	-0.495058	negative	1464
Cla97C03G055010	Cla97C03G055010.1	0.172902	0.12689	0.366356	-0.0103464	-0.0385336	0.0100763	-0.211833	-0.158763	-0.346299	0.0848733	0.0613016	-0.0566241	0.0387718	0.112902	0.0268919	-0.111914	-0.281808	-0.236801	0.0243359	-0.00618569	-0.143903	0.218069	0.179633	0.180009	0.311793	positive	1465
Cla97C03G055230	Cla97C03G055230.1	0.45715	0.342662	0.412216	0.0323684	-0.0282766	-0.020743	-0.289198	-0.248153	-0.269422	-0.196315	-0.0541895	-0.1381	-0.091264	-0.115138	-0.192197	0.496522	0.450969	0.455163	0.0302442	0.0306882	0.0513665	-0.324199	-0.375176	-0.41698	-0.0586186	negative	1468
Cla97C03G055330	Cla97C03G055330.1	-0.125587	-0.383868	-0.414565	-0.101974	-0.197167	-0.0787421	0.100202	0.256948	0.196024	0.233629	0.26181	0.253291	-2.12812	-2.15308	-2.10417	0.982532	1.07951	1.10676	0.796039	0.828464	0.784405	0.246942	0.305698	0.255011	0.609009	positive	1469
Cla97C03G055380	Cla97C03G055380.1	0.356581	0.328635	0.256304	-0.0208928	-0.00895734	0.0914695	-0.00154748	-0.12493	-0.0573035	-0.270507	-0.352969	-0.195883	0.0208207	0.0677248	-0.0573589	0.171708	0.194098	0.108107	0.033591	-0.0694004	-0.0926751	-0.170283	-0.0789192	-0.127412	0.450022	positive	1470
Cla97C03G055390	Cla97C03G055390.1	0.304943	0.260696	0.216302	-0.00525586	0.0631852	0.0078266	-0.256656	-0.254918	-0.200406	-0.0527563	-0.0878898	0.00492962	0.84987	0.800943	0.783858	0.177711	0.19213	0.237438	-0.338997	-0.300234	-0.411022	-0.739212	-0.566498	-0.685987	0.801523	positive	1471
Cla97C03G055410	Cla97C03G055410.1	-0.104292	-0.193828	-0.292884	0.0182103	-0.128165	-0.134599	0.245772	0.315866	0.161633	-0.193828	0.16032	0.145794	-0.729844	-0.753255	-0.687087	0.630372	0.64822	0.628763	0.23206	0.208295	0.232804	-0.148437	-0.160385	-0.101504	0.362301	positive	1472
Cla97C03G055740	Cla97C03G055740.1	0.280332	0.297177	0.332626	0.143312	0.0890692	0.080754	-0.155839	-0.172308	-0.113878	-0.289581	-0.165698	-0.325968	-0.39017	-0.379934	-0.311156	0.345909	0.411919	0.325047	-0.156078	-0.172934	-0.0942159	0.157976	0.120729	0.142908	-0.353474	negative	1473
Cla97C03G055760	Cla97C03G055760.1	0.219093	0.280703	0.269805	-0.0545555	-0.0229459	-0.083764	0.00506847	0.0268071	0.0368408	-0.208589	-0.227337	-0.241126	0.717054	0.688716	0.68054	-0.381011	-0.334261	-0.293073	-0.0625284	-0.0681549	0.0364967	-0.273424	-0.363391	-0.346963	0.917131	positive	1474
Cla97C03G055860	Cla97C03G055860.1	-0.0249365	0.151426	0.147468	-0.0264261	-0.137934	-0.0641754	-0.150874	-0.229327	-0.16557	0.244535	0.180124	0.0756906	-0.289859	-0.325459	-0.232138	0.193391	0.188077	0.150406	0.0562139	0.0432401	0.0289949	0.070754	0.0594885	0.0568908	-0.347574	negative	1476
Cla97C03G055950	Cla97C03G055950.1	-0.366591	-0.289776	-0.245921	0.155663	0.0652544	0.0749696	0.438615	0.219623	0.230841	-0.240747	-0.0416608	-0.000269129	-0.980945	-1.00244	-1.08079	0.189673	0.142236	0.203617	0.549212	0.500039	0.483988	0.309796	0.360513	0.325098	0.788489	positive	1478
Cla97C03G055960	Cla97C03G055960.1	0.336411	0.271802	0.374516	0.0656335	0.0528725	0.000668752	-0.0337005	-0.0171609	-0.020154	-0.386582	-0.27691	-0.367397	-0.0157806	-0.0314109	0.0118329	-0.122889	-0.139514	-0.112632	0.0454698	0.0342778	0.0492982	0.0694292	0.118601	0.0933167	-0.510562	negative	1479
Cla97C03G055970	Cla97C03G055970.1	0.364459	0.475958	0.401845	0.279361	0.179825	0.165405	-0.0440896	-0.0842529	-0.0873892	-0.536848	-0.60713	-0.507144	-0.659633	-0.636164	-0.609295	0.152254	0.183528	0.187306	0.213435	0.212228	0.211444	0.233028	0.256402	0.255467	-0.708199	negative	1480
Cla97C03G056010	Cla97C03G056010.1	0.406036	0.29963	0.158798	-0.0312316	-0.047754	0.0229949	-0.232865	-0.200597	0.0172299	-0.151071	-0.11264	-0.128529	0.123634	0.13645	0.158134	-0.125124	-0.0568055	-0.0909469	-0.0255523	-0.0417825	-0.135061	-0.0226852	0.053325	0.0264154	0.58052	positive	1482
Cla97C03G056320	Cla97C03G056320.1	-0.616783	-0.452788	-0.486243	0.130796	0.0673553	0.10435	0.643161	0.650876	0.576875	-0.189065	-0.222151	-0.206384	-1.48011	-1.43263	-1.38457	0.146227	0.23228	0.192528	0.764816	0.764447	0.809947	0.529838	0.414557	0.442664	0.798117	positive	1488
Cla97C03G056360	Cla97C03G056360.1	-0.350793	-0.453128	-0.431283	-0.1316	-0.0766185	-0.0340939	0.173255	0.231682	0.215408	0.296191	0.326812	0.234169	-1.24336	-0.946614	-1.01274	0.172064	0.242983	0.215041	0.419018	0.371086	0.37617	0.514122	0.42301	0.469217	0.909371	positive	1489
Cla97C03G056420	Cla97C03G056420.1	0.971978	0.349822	0.667124	0.193355	0.182477	0.129656	-0.326064	0.0748269	-0.226658	-1.35153	-0.26523	-0.399758	-0.767542	-0.784462	-0.765425	0.007316	0.0275777	0.0600442	0.29782	0.322235	0.305102	0.430196	0.45489	0.41225	-0.79506	negative	1490
Cla97C03G056740	Cla97C03G056740.1	-0.181128	-0.0543558	-0.248953	0.103552	0.0981024	0.114389	0.0885163	0.135822	0.0607713	-0.12429	-0.057393	0.0649673	-1.77118	-1.80188	-1.87802	1.0897	0.889596	1.09486	0.906253	0.883876	0.83234	-0.152143	-0.0367365	-0.0566597	0.878522	positive	1491
Cla97C03G056820	Cla97C03G056820.1	-0.544436	-0.988448	-0.641263	-0.434812	-0.614446	-0.49224	-0.140834	-0.112415	-0.15236	1.30987	1.44859	1.36279	-1.84785	-2.07721	-1.77039	-1.29247	-1.23834	-1.20602	0.712621	0.75047	0.840675	2.37643	2.35797	2.39412	0.929219	positive	1492
Cla97C03G056850	Cla97C03G056850.1	-0.0690065	-0.199009	-0.123749	0.0260201	-0.0133087	-0.00888549	0.145912	0.23065	0.111114	0.0459984	-0.120565	-0.0251706	-0.590761	-0.499672	-0.589068	0.00110902	0.010449	0.0327346	0.372632	0.345164	0.32552	0.172545	0.220079	0.199268	0.740492	positive	1493
Cla97C03G056890	Cla97C03G056890.1	-0.203906	-0.167422	-0.356096	0.181437	0.0719476	0.293944	0.194238	0.254151	0.208189	-0.156004	-0.138243	-0.182236	-0.615961	-0.727246	-0.479993	0.424028	0.371545	0.339101	0.132218	0.0957626	0.0268731	0.13861	0.126558	0.168504	0.639153	positive	1494
Cla97C03G056910	Cla97C03G056910.1	-0.879506	-0.806339	-0.579424	0.205502	0.221142	0.139823	0.267067	0.206812	0.176383	0.326111	0.353569	0.368861	-2.87279	-2.98323	-2.91423	0.854287	0.976381	0.887755	0.755541	0.807936	0.798501	1.23177	1.23067	1.22741	0.985309	positive	1495
Cla97C03G056940	Cla97C03G056940.1	-0.0108117	0.126427	0.184739	-0.116385	0.0615155	-0.0581174	0.147432	0.122455	0.174543	-0.0298429	-0.266303	-0.335651	0.223535	0.116792	0.218871	0.0210365	-0.0104	0.0133051	-0.1507	-0.219882	-0.161324	-0.0496219	0.00316743	-0.00477826	-0.0999929	negative	1496
Cla97C03G056980	Cla97C03G056980.1	-0.000282339	-0.122656	-0.203728	-0.15132	0.069003	-0.0458991	-0.0192367	-0.0533937	0.0298197	0.172858	0.115195	0.209641	-0.422347	-0.491812	-0.592156	0.270604	0.231277	0.253994	0.14265	0.164761	0.102397	0.0786299	0.144233	0.117771	0.43974	positive	1497
Cla97C03G057220	Cla97C03G057220.1	0.194261	0.140894	0.126234	0.259225	0.0923505	0.178845	-0.0187905	-0.0351765	-0.0593479	-0.485089	-0.193352	-0.200054	-0.48065	-0.497112	-0.372522	0.365977	0.387027	0.32387	0.108083	0.0668459	0.134029	0.00760391	-0.0282055	-0.0149464	-0.0409101	negative	1499
Cla97C03G057230	Cla97C03G057230.1	-0.325172	-0.505254	-0.478402	-0.0772445	0.00116576	-0.0121039	-0.0225098	0.0755332	-0.0121039	0.436244	0.464195	0.455652	-0.714848	-0.665192	-0.838365	0.0499073	0.054485	0.00412268	0.212459	0.23274	0.217819	0.486684	0.453209	0.506979	0.933282	positive	1500
Cla97C03G057260	Cla97C03G057260.1	-0.195661	-0.22985	-0.37342	0.10242	0.20963	0.105166	0.317729	0.214723	0.224856	-0.173865	-0.0992823	-0.102446	-0.586159	-0.499009	-0.531902	0.288148	0.325621	0.255897	0.139601	0.144558	0.14891	0.134443	0.0926849	0.0872076	0.758809	positive	1501
Cla97C03G057420	Cla97C03G057420.1	-0.0757105	-0.423078	-0.310895	-0.0711329	-0.0129097	-0.0559784	0.148864	0.137043	0.191394	0.0189264	0.260815	0.192663	-0.979441	-1.01619	-0.936371	0.164141	0.0116135	0.0247848	0.317181	0.307616	0.335001	0.620038	0.571731	0.579892	0.852053	positive	1503
Cla97C03G057450	Cla97C03G057450.1	0.262967	0.27793	0.49197	-0.283653	-0.391977	-0.500564	-0.287319	-0.37043	-0.601924	0.411708	0.50898	0.482312	-0.0321192	-0.0824155	-0.156627	0.0614069	-0.0113104	-0.022409	-0.0200982	-0.0698415	-0.0141384	0.0894571	0.115233	0.142862	0.223905	positive	1504
Cla97C03G057460	Cla97C03G057460.1	0.216842	0.3849	0.304532	-0.303092	-0.406735	-0.293862	-0.301242	-0.329256	-0.334925	0.31784	0.400904	0.344093	0.424781	0.399205	0.333321	-0.124258	-0.149621	-0.137986	-0.149611	-0.202513	-0.22594	-0.00889978	-0.076804	-0.0816746	0.667804	positive	1505
Cla97C03G057510	Cla97C03G057510.1	-0.231204	-0.246634	-0.246634	0.0372206	0.0172621	0.076328	0.0372206	0.0201303	0.00428422	0.160626	0.173565	0.197834	0.270874	0.246388	0.242677	-0.0431547	-0.0756837	-0.0783854	-0.111505	-0.188852	-0.222131	-0.0253548	-0.0278294	0.0129577	-0.70945	negative	1506
Cla97C03G057550	Cla97C03G057550.1	0.0351567	0.0491908	-0.004881	-0.201882	-0.0401062	0.0238303	0.00523307	-0.0460616	-0.100796	0.150308	0.0435935	0.0864148	0.336811	0.312899	0.238042	-0.11163	-0.109331	-0.102009	-0.0131625	-0.0788341	-0.050086	-0.105148	-0.134218	-0.183334	0.117494	positive	1507
Cla97C03G057590	Cla97C03G057590.1	-0.168608	0.102833	-0.21673	0.122974	-0.09853	0.100127	0.00927328	-0.0799941	-0.0938736	0.0892487	0.0236286	0.209652	-0.210987	-0.158086	-0.212867	0.0592446	0.125628	0.075187	0.0127081	-0.0598239	-0.00248133	0.142644	0.107449	0.121384	0.600634	positive	1508
Cla97C03G057620	Cla97C03G057620.1	0.576524	0.421199	0.447338	0.0828355	0.132711	0.125691	0.257425	0.371023	0.32027	-0.965824	-0.918615	-0.850578	0.319219	0.486963	0.459614	0.12554	0.23071	0.165428	-0.164493	-0.241457	-0.227269	-0.451901	-0.341855	-0.360502	0.720062	positive	1509
Cla97C03G057660	Cla97C03G057660.1	-0.197126	0.00385397	0.181515	-0.160809	-0.302884	-0.188791	0.0312249	-0.0768982	-0.136561	0.191765	0.48741	0.167301	-0.403756	-0.425005	-0.373121	-0.249248	-0.163421	-0.219245	0.191726	0.197745	0.215907	0.409192	0.414629	0.404596	0.543198	positive	1511
Cla97C03G057810	Cla97C03G057810.1	0.763038	0.577026	0.453807	-0.45697	-0.226262	-0.411818	-0.0243192	0.00926885	0.013789	-0.254973	-0.253162	-0.189425	-0.18028	-0.267119	-0.14425	0.0860123	0.124912	0.0754054	0.118441	0.134392	0.135628	-0.0450064	-0.0178386	-0.0202973	-0.731656	negative	1513
Cla97C03G057820	Cla97C03G057820.1	0.534628	0.356874	0.280833	-0.222969	-0.0422969	0.0437509	-0.202673	-0.133804	-0.264439	-0.130605	-0.169468	-0.0498306	0.354898	0.330195	0.206689	0.348523	0.337479	0.276365	-0.224301	-0.357739	-0.333935	-0.287239	-0.355561	-0.295375	0.629157	positive	1514
Cla97C03G057960	Cla97C03G057960.1	0.162137	0.155606	0.146413	0.00389373	0.0567247	0.00243866	0.0511056	0.0355394	0.0412193	-0.190414	-0.272583	-0.192079	-0.22955	-0.204683	-0.283151	0.248376	0.176216	0.18953	-0.022803	-0.043004	0.0163736	0.0253819	0.0668995	0.0604135	-0.506607	negative	1516
Cla97C03G058020	Cla97C03G058020.1	0.096696	-0.174466	0.0486246	0.038815	-0.0406725	0.0402205	0.00466682	0.0303535	-0.00544726	-0.0347416	-0.0258906	0.021842	0.61265	0.595369	0.682165	0.0698229	0.0616193	0.0487836	-0.217057	-0.203128	-0.258165	-0.460357	-0.465983	-0.46572	0.00887399	positive	1518
Cla97C03G058090	Cla97C03G058090.1	-0.0488468	0.108748	0.0460124	-0.0211018	-0.368054	-0.179054	-0.51081	-0.454061	-0.413419	0.584576	0.667428	0.588583	-0.126366	-0.181326	-0.118708	-0.0965277	-0.0789439	-0.0945498	0.0543141	0.00159195	-0.00744476	0.217039	0.208601	0.222319	0.596614	positive	1519
Cla97C03G058110	Cla97C03G058110.1	0.166847	0.169449	0.215496	-0.147613	-0.187007	-0.175405	-0.0780723	0.0823923	-0.0811616	0.0573256	-0.0611985	0.0389471	0.58908	0.593907	0.542155	-0.0969987	-0.0389495	-0.0870207	-0.364844	-0.388396	-0.360165	-0.0970184	-0.142135	-0.149614	0.661	positive	1520
Cla97C03G058150	Cla97C03G058150.1	0.469795	0.213484	0.418341	0.0498347	0.117269	0.249507	-0.342835	-0.059901	-0.320809	-0.177026	-0.141201	-0.47646	0.00465115	0.000136617	0.0840394	0.209377	0.248349	0.198831	0.0709249	-0.0569517	-0.0193297	-0.235799	-0.276146	-0.228083	0.507541	positive	1521
Cla97C03G058260	Cla97C03G058260.1	0.387883	0.36446	0.255901	-0.0242074	-0.0675438	-0.00374328	-0.0827944	-0.0212661	-0.0997584	-0.283126	-0.239746	-0.186058	0.725298	0.739201	0.886553	-0.31317	-0.092748	-0.184277	-0.18576	-0.16016	-0.117551	-0.412952	-0.460689	-0.423745	0.943281	positive	1523
Cla97C03G058270	Cla97C03G058270.1	-0.20481	-0.125226	-0.165281	0.195121	0.170874	0.215229	0.111765	0.0640573	0.0459275	-0.123647	-0.0348845	-0.149125	0.0843483	0.149916	0.142853	0.514405	0.420859	0.456118	-0.0936956	-0.171103	-0.106366	-0.456157	-0.51725	-0.423927	0.537254	positive	1524
Cla97C03G058310	Cla97C03G058310.1	-0.0248445	0.0811278	-0.00157474	-0.0740575	-0.166459	-0.132888	0.0960361	0.131989	0.0284081	0.0184829	-0.0277798	0.07156	-0.589187	-0.493432	-0.553687	-0.104798	-0.113533	-0.186007	0.210632	0.16436	0.228178	0.488089	0.409278	0.540106	0.276345	positive	1525
Cla97C03G058350	Cla97C03G058350.1	1.61413	1.34512	0.748923	-0.820741	-0.60096	0.0252255	-0.98497	-0.407988	-0.0984593	-0.632668	-0.279032	0.0914158	0.417972	0.343823	0.342476	-0.188641	-0.201686	-0.232442	-0.196274	-0.228653	-0.149135	0.0141841	0.0444844	0.0338894	0.868813	positive	1526
Cla97C03G058360	Cla97C03G058360.1	-0.0394882	-0.02905	-0.10532	0.0782896	-0.172658	0.044802	0.101548	0.12844	0.112365	-0.0560451	-0.0530206	-0.00986301	-0.0974464	-0.0590777	-0.225283	-0.191593	-0.252985	-0.266412	0.155156	0.0551815	0.0341871	0.236802	0.33002	0.28145	0.176559	positive	1527
Cla97C03G058440	Cla97C03G058440.1	-0.102357	-0.0977003	-0.0549507	-0.026647	-0.0624922	-0.0236998	0.240561	0.24301	0.238107	-0.116417	-0.164298	-0.0731171	0.795267	0.89627	0.748172	-0.0304287	0.0756668	0.0543893	-0.223298	-0.265652	-0.255594	-0.57144	-0.61652	-0.606832	-0.202599	negative	1529
Cla97C03G058470	Cla97C03G058470.1	0.132801	0.0977759	0.0757915	0.0279319	-0.0575643	0.050652	0.124793	0.313921	0.26254	-0.252381	-0.373809	-0.402454	-0.116841	-0.0497936	-0.107123	-0.0689588	0.00265752	-0.097239	0.012984	0.0215413	0.0203794	0.0988982	0.1925	0.0909947	-0.647021	negative	1530
Cla97C03G058480	Cla97C03G058480.1	0.0621485	0.0312123	0.170653	-0.064268	-0.0566948	-0.0566948	0.0677026	0.0509755	-0.0194138	-0.0342108	-0.0780008	-0.0734087	0.335092	0.260131	0.184481	-0.204191	-0.2023	-0.172051	-0.126815	-0.0904962	-0.0466879	0.020993	0.0537071	-0.0118635	0.516704	positive	1531
Cla97C03G058500	Cla97C03G058500.1	0.220718	0.242763	0.18953	0.0534134	0.0492498	0.0324741	-0.0410825	-0.0455284	-0.0248971	-0.24072	-0.217124	-0.218797	0.0568292	0.144951	0.107557	-0.129209	-0.0732818	-0.0440338	-0.13286	-0.119438	-0.118467	0.0612425	0.141775	0.104936	0.00739741	positive	1532
Cla97C03G058530	Cla97C03G058530.1	-0.304004	-0.381192	-0.360074	0.20506	0.310594	0.321329	0.41005	0.386389	0.417851	-0.276765	-0.318744	-0.410496	0.159891	-0.0279551	-0.00261487	0.00073549	-0.145606	-0.0465924	0.1847	0.195408	0.109663	-0.16833	-0.107279	-0.15202	0.455352	positive	1533
Cla97C03G058550	Cla97C03G058550.1	0.542447	0.579975	0.459985	-0.0705297	-0.0815728	-0.0317661	-0.263624	-0.356374	-0.0626932	-0.314828	-0.146351	-0.254669	1.3744	1.28729	1.43777	-0.459333	-0.561952	-0.504223	-0.258593	-0.270383	-0.346115	-0.599183	-0.559792	-0.539886	0.924448	positive	1534
Cla97C03G058720	Cla97C03G058720.1	-0.35782	-0.465901	-0.322289	0.0198174	0.000747396	0.0183594	0.115657	0.155995	0.0727531	0.248442	0.259592	0.254647	-0.653417	-0.698861	-0.70169	0.107259	0.18943	0.146164	0.154105	0.196935	0.154993	0.387106	0.377291	0.340685	0.972276	positive	1538
Cla97C03G058730	Cla97C03G058730.1	0.540299	0.620469	0.599852	-0.134479	0.0649357	0.0213024	0.0777724	-0.193236	-0.254487	-0.445346	-0.467969	-0.429113	1.01586	1.07801	0.980574	-0.254107	-0.144363	-0.274592	-0.447372	-0.613827	-0.409115	-0.375395	-0.33292	-0.222746	0.875245	positive	1539
Cla97C03G058780	Cla97C03G058780.1	0.04173	0.316258	0.303351	-0.014458	-0.0292247	0.064163	0.0669428	-0.0456446	-0.039652	-0.0501553	-0.253597	-0.359713	-0.508258	-0.511017	-0.450475	-0.578718	-0.426316	-0.522783	0.109689	0.149396	0.233751	0.74102	0.833394	0.930317	-0.7554	negative	1540
Cla97C03G059000	Cla97C03G059000.1	0.316179	0.321	0.540468	0.221379	0.296733	0.321	-0.0163512	-0.0285645	-0.104099	-0.379138	-0.759411	-0.729196	-0.248842	-0.248714	-0.301778	-0.0671928	-0.251866	-0.110234	-0.0224021	-0.094188	-0.0442022	0.413241	0.491805	0.484373	-0.957692	negative	1542
Cla97C03G059050	Cla97C03G059050.1	0.189125	0.274561	0.146404	0.0805408	0.156878	0.142457	0.107788	0.0846609	0.0301603	-0.376829	-0.641375	-0.19437	0.170151	0.167247	0.11852	-0.140011	-0.0911501	-0.1354	-0.110201	-0.0313096	0.00880438	0.0748621	-0.0573011	0.0257891	0.11948	positive	1544
Cla97C03G059110	Cla97C03G059110.1	-0.00618014	0.00116184	0.123271	-0.00470875	0.0215228	-0.0770848	0.0864691	-0.0106033	-0.0135597	-0.0449726	-0.0632348	-0.0120807	0.0995653	0.104537	0.267448	-0.213412	-0.136779	-0.120676	-0.0701975	-0.140685	-0.0663362	-0.00701654	0.146067	0.137484	0.276358	positive	1545
Cla97C03G059210	Cla97C03G059210.1	0.416188	0.327971	0.379521	-0.0681423	-0.078926	-0.0712151	-0.184771	-0.140528	-0.102309	-0.211644	-0.0696779	-0.196466	0.622461	0.67591	0.466898	-0.819001	-0.802159	-0.5752	-0.371856	-0.287988	-0.349073	0.530654	0.507018	0.402337	0.493492	positive	1547
Cla97C03G059290	Cla97C03G059290.1	0.328022	0.334046	0.438382	-0.400918	-0.353676	-0.392936	-0.637385	-0.449758	-0.435341	0.628789	0.512495	0.428282	0.362745	0.364765	0.341624	-0.535807	-0.457477	-0.441718	-0.169222	-0.200665	-0.17819	0.250527	0.274882	0.388535	0.880752	positive	1548
Cla97C03G059400	Cla97C03G059400.1	0.524761	-0.0525962	0.287722	-0.238539	-0.00631853	-0.116175	-0.0240568	0.185959	0.101226	-0.347845	-0.0617272	-0.252411	0.757336	0.759906	0.748645	-0.482319	-0.266557	-0.258524	-0.236552	-0.238011	-0.229916	-0.232533	-0.220591	-0.100885	0.620645	positive	1551
Cla97C03G059530	Cla97C03G059530.1	-0.0315199	-0.0596204	-0.144193	0.0919346	0.0454802	0.0932785	0.110636	0.0592992	0.130409	-0.119074	-0.0403347	-0.136296	0.379139	0.463171	0.407355	-0.117145	-0.0247433	-0.0742212	-0.0234054	-0.0889429	-0.172496	-0.128698	-0.320097	-0.299915	-0.263595	negative	1553
Cla97C03G059540	Cla97C03G059540.1	0.223182	0.258806	0.0642525	-0.0786766	-0.388771	-0.0756135	0.0162523	0.0600808	0.0999102	-0.150984	0.0319572	-0.0603951	2.3976	2.40948	2.57497	-0.789757	-0.445625	-0.355415	-1.30205	-1.29123	-1.13199	-0.854696	-0.531724	-0.679565	0.533014	positive	1554
Cla97C03G059560	Cla97C03G059560.1	0.370247	0.171942	0.375884	-0.337271	-0.374649	-0.23749	-0.317119	-0.365214	-0.384147	0.362317	0.393778	0.341723	1.2678	1.27986	1.29578	-0.418419	-0.400333	-0.404491	-0.47674	-0.466972	-0.437604	-0.410237	-0.416686	-0.411954	0.526921	positive	1555
Cla97C03G059760	Cla97C03G059760.1	1.35474	1.48807	1.73974	-0.109351	-0.188562	-0.303691	-0.301432	-0.433752	-1.01008	-0.368439	-0.664002	-1.20325	4.291	4.31361	4.21551	0.731594	0.480769	0.735436	-1.74699	-1.8454	-1.82456	-3.20244	-3.00418	-3.14435	0.925706	positive	1556
Cla97C03G059820	Cla97C03G059820.1	0.20032	0.294285	0.206531	-0.129722	-0.103363	0.0145938	-0.156571	0.0863983	-0.0314382	0.00749743	-0.257245	-0.131287	1.23405	1.22607	0.990729	-0.38405	-0.282084	-0.443792	-0.192675	-0.273948	-0.248896	-0.341899	-0.681227	-0.602278	0.872722	positive	1557
Cla97C03G059980	Cla97C03G059980.1	0.287732	0.350084	0.267148	0.143722	0.0895804	0.143722	-0.0207339	-0.0877772	-0.0877772	-0.388418	-0.343034	-0.354247	2.71722	2.73696	2.89033	0.336932	0.452846	0.30651	-0.595694	-0.443938	-0.660886	-2.49781	-2.5903	-2.65216	0.969099	positive	1558
Cla97C03G060020	Cla97C03G060020.1	0.649105	0.530571	0.571852	0.0106031	0.0359011	-0.0166756	0.0937323	0.0751903	0.0388484	-0.700573	-0.578117	-0.710437	1.72526	1.81255	1.84825	-0.191255	0.0856744	-0.163954	-1.28142	-1.19049	-1.25099	-0.525855	-0.446325	-0.421449	0.637456	positive	1559
Cla97C03G060050	Cla97C03G060050.1	-0.6742	-0.440573	-0.369118	0.23699	0.178574	-0.0108576	0.25971	0.101013	0.206129	0.106594	0.207429	0.19831	-1.0614	-0.9316	-1.0747	0.822135	0.981154	0.85274	0.274994	0.15613	0.271468	-0.016953	-0.0912466	-0.182723	0.789201	positive	1560
Cla97C03G060110	Cla97C03G060110.1	0.361097	0.539914	0.242845	0.180524	0.078201	0.193464	-0.226736	-0.286563	-0.175931	-0.301008	-0.406389	-0.199418	-0.190184	-0.0531584	-0.105837	0.00701567	0.261828	0.136867	-0.00687611	0.00846287	-0.0851603	-0.00553964	0.0342693	-0.00168797	-0.1885	negative	1562
Cla97C03G060560	Cla97C03G060560.1	-0.0962539	-0.0416884	0.0255648	0.158015	0.162006	0.147319	0.122957	0.0995654	0.17786	-0.37398	-0.10422	-0.277144	-0.503873	-0.405709	-0.588452	0.379927	0.407575	0.524966	0.0460562	0.0329788	0.00552451	0.0180699	0.0273624	0.0555743	0.337262	positive	1565
Cla97C03G060660	Cla97C03G060660.1	1.3958	1.69197	1.50142	-0.152865	-0.266821	-0.158965	-0.212943	-0.881737	-0.381018	-0.584912	-1.13072	-0.819216	1.89504	2.05627	2.06537	0.250291	0.349476	0.234829	-0.568943	-0.250613	-0.483664	-1.80702	-1.90033	-1.8407	0.918197	positive	1566
Cla97C03G060700	Cla97C03G060700.1	0.137762	0.209718	0.133804	-0.0460643	0.0648007	0.0452668	-0.0656521	-0.0105864	0.0620263	-0.222552	-0.127646	-0.180877	-0.15394	-0.22899	-0.336232	-0.0192635	-0.069564	-0.0188524	0.0442245	-0.0817406	0.0552321	0.267524	0.242836	0.298766	-0.905944	negative	1567
Cla97C03G060720	Cla97C03G060720.1	0.570199	0.763472	0.678476	-0.138926	-0.160422	-0.0715876	-0.18563	-0.298425	-0.258649	-0.0825946	-0.393124	-0.42279	3.6086	3.64782	3.65283	-0.716732	-0.710051	-0.97974	-1.40529	-1.36657	-1.45546	-1.44385	-1.37243	-1.45913	0.970111	positive	1568
Cla97C03G060840	Cla97C03G060840.1	0.490265	0.511326	0.535173	0.222981	0.149652	0.14157	-0.145987	-0.204881	-0.232626	-0.608514	-0.45356	-0.405399	1.15242	1.12767	1.18135	-0.178032	-0.226711	-0.182388	-0.346304	-0.432515	-0.27699	-0.630976	-0.528588	-0.658938	0.886917	positive	1570
Cla97C03G060850	Cla97C03G060850.1	-0.279024	-0.121059	-0.154518	0.222132	0.0141522	-0.0133561	-0.0399095	0.0895862	0.108516	0.0731606	0.032676	0.0676436	-0.430116	-0.430994	-0.4796	0.200527	0.210814	0.155511	0.144484	0.110147	0.134298	0.136133	0.122958	0.125839	0.830175	positive	1571
Cla97C03G060880	Cla97C03G060880.1	0.33656	0.562646	0.436566	-0.0636485	-0.0420693	-0.0934605	0.11024	0.101956	0.0598103	-0.385965	-0.617122	-0.405514	0.611707	0.647477	0.5391	-0.0481004	-0.012196	0.0978396	-0.202538	-0.283306	-0.329972	-0.351437	-0.311616	-0.356957	0.797735	positive	1572
Cla97C03G060930	Cla97C03G060930.1	0.672254	0.52078	0.691175	0.0289926	0.0034841	0.0496662	-0.129636	-0.0117343	-0.180321	-0.605136	-0.353689	-0.685834	0.396462	0.390382	0.406485	-0.170729	0.012452	-0.0767017	-0.172197	-0.266443	-0.185236	-0.159039	-0.111925	-0.0635102	0.79474	positive	1573
Cla97C03G061010	Cla97C03G061010.1	0.21697	0.167239	0.208169	0.0720524	0.038402	0.0440652	-0.052345	0.085845	0.00685078	-0.281046	-0.270464	-0.23574	-0.043078	-0.0893701	-0.00554016	-0.172527	-0.213698	-0.142714	-0.116349	-0.118555	-0.116207	0.3053	0.363756	0.348982	-0.784221	negative	1575
Cla97C03G061060	Cla97C03G061060.1	-0.0265797	-0.136903	-0.15937	-0.0414072	-0.0730498	-0.251187	0.153472	0.133807	0.121879	-0.0548834	0.0813888	0.252834	-0.0835591	-0.147077	-0.0196247	0.0782149	0.198182	0.121121	-0.0152276	-0.0303401	0.0100048	-0.0535294	-0.0260193	-0.032145	-0.230531	negative	1576
Cla97C03G061240	Cla97C03G061240.1	-0.131868	0.00592476	0.0044799	0.0443989	-0.0262014	-0.0500235	-0.200193	-0.0590592	-0.205199	0.270403	0.10363	0.243708	0.715023	0.707069	0.641039	0.202763	0.27008	0.231055	-0.377899	-0.308704	-0.387978	-0.514244	-0.525807	-0.652399	-0.320578	negative	1580
Cla97C03G061260	Cla97C03G061260.1	-0.0839006	-0.153594	-0.0624133	0.364383	0.220291	0.304214	0.0531811	0.108358	0.0727339	-0.349721	-0.19809	-0.275442	0.391848	0.404932	0.4162	0.420157	0.377284	0.369921	-0.0936735	-0.113256	-0.0897057	-0.679393	-0.682235	-0.722079	0.662255	positive	1581
Cla97C03G061270	Cla97C03G061270.1	0.429364	0.373308	0.344442	0.164569	0.172475	0.144615	-0.130526	-0.151755	-0.100051	-0.456513	-0.412488	-0.377441	0.19591	0.183049	0.244536	-0.0756087	0.0738302	0.0151818	-0.14006	0.0335595	0.0137563	-0.181909	-0.104029	-0.258215	0.866634	positive	1582
Cla97C03G061560	Cla97C03G061560.1	0.952753	0.778621	0.684428	-0.140623	-0.0528588	0.0313873	-0.385672	-0.299281	-0.17518	-0.561934	-0.377601	-0.45404	2.28105	2.36552	2.29463	-0.230903	-0.0947004	-0.0773321	-0.882388	-0.884083	-0.864336	-1.35353	-1.30517	-1.24876	0.985568	positive	1586
Cla97C03G061570	Cla97C03G061570.1	-0.483914	-0.397547	-0.0928785	-0.195914	-0.124798	-0.265371	0.0822984	0.267058	0.305889	0.479401	0.292658	0.133117	-0.956794	-0.947913	-1.0632	0.214986	0.185244	0.179754	0.28217	0.232186	0.264862	0.459968	0.56811	0.580625	0.705696	positive	1587
Cla97C03G061840	Cla97C03G061840.1	-0.377161	-0.421493	-0.369245	-0.251796	-0.104896	-0.10654	-0.143192	-0.165296	-0.205253	0.664886	0.738163	0.741823	-0.24021	-0.192644	-0.142922	0.113136	0.199636	0.194705	0.146806	0.016352	0.0201326	-0.0313466	-0.0988415	0.0151962	0.0611216	positive	1589
Cla97C03G061860	Cla97C03G061860.1	-0.0683424	-0.2101	-0.0147376	0.0113359	0.123164	0.0369465	0.179186	0.0909242	0.0895651	-0.124016	-0.0118172	-0.102109	-0.54297	-0.734132	-0.580883	-0.035881	-0.0919329	0.0526395	0.365826	0.344993	0.344545	0.308402	0.274602	0.294791	0.488881	positive	1590
Cla97C03G061920	Cla97C03G061920.1	0.204501	0.260595	0.245849	-0.0236229	-0.00733777	-0.00881066	0.0246911	-0.0176797	-0.0431089	-0.228014	-0.226299	-0.180763	0.0198097	0.0105424	-0.0415588	-0.184453	-0.248359	-0.356836	-0.0991607	-0.0248491	-0.0695948	0.288931	0.285197	0.420331	-0.47003	negative	1593
Cla97C03G061940	Cla97C03G061940.1	0.464322	-0.765684	-0.173108	0.163927	0.131506	0.0600913	-0.254677	0.72826	0.390892	-0.30002	-0.307409	-0.138101	0.117244	0.150491	0.12397	-0.153023	-0.156572	-0.204073	0.0317301	-0.098987	-0.00126899	0.0803722	0.0394619	0.0706549	-0.485243	negative	1595
Cla97C03G061950	Cla97C03G061950.1	0.0928571	0.329981	0.182461	0.0602764	0.0444304	-0.00717892	0.0787819	0.0688469	0.149171	-0.374475	-0.355239	-0.269913	0.0266966	0.135533	-0.0360313	-0.309088	-0.202098	-0.25143	0.00447905	0.0398033	-0.0302625	0.253834	0.150841	0.217723	-0.446397	negative	1596
Cla97C03G061990	Cla97C03G061990.1	-0.0676453	-0.0344785	-0.0922548	-0.117291	-0.137958	-0.122034	0.183649	0.122137	0.0648585	0.00810797	0.108704	0.0842052	0.255417	0.137128	0.183297	-0.0151245	0.0874081	0.0779884	0.0117545	0.0395709	-0.00707935	-0.319477	-0.235748	-0.215134	-0.463795	negative	1597
Cla97C03G062020	Cla97C03G062020.1	0.522328	0.388699	0.352403	0.0264492	0.0843059	0.063407	-0.152684	-0.0967275	-0.126834	-0.446363	-0.361017	-0.253967	0.315181	0.311085	0.432353	-0.0622436	0.0405548	0.00490119	-0.219319	-0.206185	-0.156549	-0.170441	-0.204265	-0.0850723	0.8965	positive	1598
Cla97C03G062030	Cla97C03G062030.1	-0.282455	-0.195309	-0.153634	-0.081524	-0.171823	-0.178494	-0.166839	-0.220904	-0.0752853	0.44875	0.562145	0.515372	-0.644641	-0.619835	-0.654685	-0.198469	-0.158599	-0.216858	0.249151	0.169844	0.238044	0.634136	0.567859	0.634054	0.787122	positive	1599
Cla97C03G062120	Cla97C03G062120.1	-0.450565	-0.556537	-0.137656	-0.179379	-0.191282	-0.137656	-0.00870211	0.0136888	0.0574544	0.52678	0.696013	0.367841	-0.362214	-0.395312	-0.448724	0.347005	0.360761	0.367669	0.0356002	0.0483189	0.059686	0.0167508	-0.0191256	-0.0104159	0.223243	positive	1600
Cla97C03G062130	Cla97C03G062130.1	-0.323181	-0.368328	-0.299304	0.0895398	0.0226244	0.0978631	0.283228	0.273463	0.231211	-0.00830751	-0.00236437	0.00355439	-0.403162	-0.394219	-0.25637	0.338856	0.283687	0.330713	0.0486387	-0.0234263	0.00723006	0.00982368	0.0170445	0.0411847	0.69299	positive	1601
Cla97C03G062150	Cla97C03G062150.1	-0.293622	-0.434531	-0.389837	-0.0579939	0.0531501	0.0601705	0.224169	0.258756	0.175863	0.143177	0.105668	0.15503	0.392285	0.369442	0.489658	0.0917377	0.114065	0.156671	-0.233293	-0.17963	-0.266725	-0.261548	-0.307618	-0.365045	-0.896911	negative	1602
Cla97C03G062160	Cla97C03G062160.1	0.537584	0.814077	0.472697	-0.332212	-0.820684	-0.25451	0.120811	0.122199	0.0379408	-0.229512	-0.370738	-0.0976522	0.352484	0.387756	0.219378	0.0417734	0.106045	0.0324813	-0.0461213	-0.0781525	0.00159696	-0.301916	-0.365023	-0.350301	0.579158	positive	1603
Cla97C03G062180	Cla97C03G062180.1	0.0836767	0.103892	0.118539	-0.19876	-0.120062	-0.135778	-0.0588572	0.0944936	-0.140526	0.153872	0.0212726	0.0782377	-0.295765	-0.25784	-0.165281	-0.252537	-0.12947	-0.212489	0.0362257	0.0707072	0.100483	0.399405	0.36447	0.342091	0.314448	positive	1604
Cla97C03G062220	Cla97C03G062220.1	-0.138759	-0.130775	-0.0992743	0.130666	0.236917	0.151766	0.151766	0.128006	0.143889	-0.143571	-0.233043	-0.197586	1.31365	1.40317	1.40527	0.358209	0.396035	0.389521	-0.539142	-0.445305	-0.462228	-1.28611	-1.206	-1.32707	0.112882	positive	1607
Cla97C03G062230	Cla97C03G062230.1	0.192973	0.398657	0.259157	-0.242225	-0.432157	-0.309421	0.0605715	0.0135926	-0.0530394	0.0265575	-0.0275043	0.112839	-0.496902	-0.430846	-0.708499	-0.28158	-0.403071	-0.289338	0.794192	0.779093	0.706435	0.14805	0.0953933	0.0870712	-0.0631304	negative	1608
Cla97C03G062530	Cla97C03G062530.1	0.671921	0.598268	0.576227	0.0276512	0.0452631	0.0335457	-0.134726	-0.0669357	-0.123204	-0.621475	-0.573647	-0.432888	0.911267	0.767162	0.838471	-0.225796	-0.349455	-0.244446	-0.237659	-0.375307	-0.263526	-0.178359	-0.369594	-0.272757	0.84059	positive	1609
Cla97C03G062650	Cla97C03G062650.1	-0.217606	-0.252498	-0.138788	-0.372101	-0.483747	-0.377868	0.219242	0.253219	0.177908	0.381649	0.447262	0.363329	0.741643	0.715207	0.65504	-0.243798	-0.317028	-0.28956	-0.294956	-0.218094	-0.28926	-0.170697	-0.157389	-0.131108	-0.270966	negative	1612
Cla97C03G062670	Cla97C03G062670.1	0.00103958	-0.0135332	-0.0687699	-0.0238225	-0.163097	-0.126206	0.00393656	0.073154	0.060687	0.0354252	0.111265	0.109921	0.989469	0.993178	1.05468	-0.68867	-0.682029	-0.696382	-0.317469	-0.440227	-0.269588	0.0432881	0.0252258	-0.0114744	0.132039	positive	1613
Cla97C03G062720	Cla97C03G062720.1	0.156745	-0.08118	-0.287749	-0.0253073	0.163259	0.213078	0.15805	0.285319	0.264872	-0.209934	-0.411989	-0.225165	-0.234164	-0.0328187	-0.199915	0.00840518	0.000355187	-0.0324269	0.00840832	0.0276991	-0.02375	0.184499	0.144309	0.1494	-0.338756	negative	1614
Cla97C03G062790	Cla97C03G062790.1	0.74718	0.640767	0.524788	-0.475212	-0.295408	-0.238898	-0.501563	-0.301183	-0.356224	0.154738	0.0437065	0.0573098	2.66246	2.69474	2.73593	-0.476762	-0.44729	-0.446494	-0.742269	-0.710015	-0.714619	-1.46281	-1.5879	-1.50496	0.751322	positive	1617
Cla97C03G062820	Cla97C03G062820.1	-0.0729267	0.0515719	0.0515719	-0.200711	-0.1739	-0.0636687	-0.367257	-0.397954	-0.159036	0.586449	0.494385	0.251476	0.288332	0.269263	0.20322	-0.0911243	-0.0985297	-0.0678973	-0.111611	-0.123898	-0.19121	-0.0502379	-0.0164563	-0.00984958	0.224869	positive	1618
Cla97C03G062850	Cla97C03G062850.1	0.594165	0.576426	0.316363	-0.231673	-0.137587	-0.17716	-0.050794	-0.204159	0.0165291	-0.371956	-0.268599	-0.0615547	1.05638	1.00002	1.01466	-0.272973	-0.22441	-0.345398	-0.417161	-0.374709	-0.406767	-0.328768	-0.348512	-0.352366	0.912303	positive	1619
Cla97C03G062880	Cla97C03G062880.1	-0.274691	-0.281859	-0.336791	-0.0347832	-0.062293	0.0981716	0.143026	0.116008	0.0856927	0.136319	0.233791	0.177409	-2.05307	-2.1917	-2.06196	0.320482	0.299456	0.381684	0.728897	0.857162	0.752774	0.993705	0.993573	0.978997	0.95932	positive	1620
Cla97C03G062930	Cla97C03G062930.1	0.17129	0.269285	0.226689	-0.271392	-0.180138	0.0141441	-0.198264	-0.125508	-0.368811	0.256033	0.132261	0.0744111	-0.444692	-0.551141	-0.461601	-0.0176173	0.0127747	0.0189495	0.0908849	0.0734222	0.145577	0.426146	0.346075	0.361222	-0.282627	negative	1622
Cla97C03G063000	Cla97C03G063000.1	-0.0320691	0.393014	0.327012	-0.245776	-0.194732	-0.054647	-0.100891	-0.218328	-0.12299	0.37398	0.00479275	-0.129366	1.55042	1.55277	1.55428	-0.0830057	0.131386	0.0983818	-0.54953	-0.44473	-0.515457	-1.15995	-1.07496	-1.0596	0.369762	positive	1623
Cla97C03G063160	Cla97C03G063160.1	0.130167	0.36745	0.177733	0.0329323	-0.131256	0.0500734	-0.0544408	0.0920558	0.0242847	-0.214097	-0.311077	-0.163824	-0.35292	-0.406257	-0.492521	-0.0564752	-0.10456	-0.0309205	0.183459	0.198863	0.170915	0.261335	0.320813	0.308268	-0.784254	negative	1626
Cla97C03G063170	Cla97C03G063170.1	0.0988028	0.0988028	0.112311	0.097445	0.060292	-0.019958	0.0575015	0.121693	0.0796759	-0.237447	-0.273885	-0.195235	-0.280597	-0.11204	-0.13611	-0.0611021	-0.230003	-0.166886	-0.0511702	-0.158269	0.00543902	0.428232	0.373834	0.388673	-0.911459	negative	1627
Cla97C03G063230	Cla97C03G063230.1	0.413672	0.262278	0.156112	0.0556395	-0.0675922	0.381499	-0.0814422	0.112169	-0.209083	-0.388755	-0.257178	-0.37732	0.990967	0.956662	0.921238	-0.313282	-0.317343	-0.28278	-0.282892	-0.488419	-0.357781	-0.279443	-0.275423	-0.271504	0.581909	positive	1629
Cla97C03G063270	Cla97C03G063270.1	-0.0508295	-0.673389	-0.258351	-0.0742125	0.0376335	0.00824969	-0.348607	-0.260138	-0.015696	0.525344	0.722778	0.387218	-0.787339	-0.861879	-0.785484	0.33106	0.401512	0.335437	0.150629	0.130739	0.105255	0.285661	0.348698	0.345713	0.591901	positive	1630
Cla97C03G063300	Cla97C03G063300.1	0.0800385	0.360639	0.22715	0.0173027	-0.0361365	0.0361239	0.104937	0.111778	0.0617852	-0.313762	-0.416313	-0.233542	0.00719685	-0.145487	-0.188521	-0.387326	-0.309589	-0.290935	0.0524124	0.100794	0.0369553	0.387954	0.339405	0.397139	-0.652654	negative	1632
Cla97C03G063390	Cla97C03G063390.1	1.07955	1.49872	1.16302	-0.0962977	-0.79518	-0.192022	-0.182537	-0.818497	-0.33391	-0.336011	-0.621085	-0.365758	4.13755	4.23389	4.12231	0.523371	0.636959	0.436502	-1.70063	-1.60722	-1.8218	-2.72509	-3.13857	-3.09727	0.858096	positive	1633
Cla97C03G063410	Cla97C03G063410.1	-0.240396	-0.223403	-0.218344	0.234492	0.14703	0.089714	0.0214987	0.0497323	0.0539201	0.0257691	0.0200724	0.0399133	-0.735393	-0.752416	-0.684325	0.222044	0.234592	0.214797	0.386822	0.363673	0.367877	0.120389	0.124462	0.13748	0.890786	positive	1634
Cla97C03G063420	Cla97C03G063420.1	0.0420719	0.0534094	0.305343	-0.0115553	0.0688545	-0.0308807	-0.177241	-0.149354	-0.1575	0.013332	0.116926	-0.0734053	-0.366977	-0.388424	-0.44284	-0.258142	-0.29142	-0.261944	0.178613	0.211902	0.189182	0.506487	0.490153	0.433409	-0.43901	negative	1635
Cla97C03G063430	Cla97C03G063430.1	0.233092	0.122851	-0.0081403	-0.0346395	-0.022802	0.0392125	-0.273218	-0.230047	-0.0677027	0.044848	0.132145	0.0644008	0.0522369	0.125721	0.104301	0.261472	0.296331	0.269438	-0.0645829	-0.0385961	-0.0877242	-0.306468	-0.298597	-0.313532	-0.0545987	negative	1636
Cla97C03G063500	Cla97C03G063500.1	-0.789662	-0.637392	-0.450176	0.18059	0.259024	0.165483	-0.187847	-0.241752	-0.207379	0.680195	0.61193	0.616986	-0.993746	-0.981776	-0.921606	0.37145	0.456725	0.372329	0.309518	0.260218	0.313261	0.289871	0.252716	0.271039	0.752078	positive	1637
Cla97C03G063780	Cla97C03G063780.1	0.900742	0.815932	0.993906	0.291738	0.325716	0.2957	-0.561293	-0.278097	-0.612345	-0.655039	-0.662706	-0.854254	3.95713	3.92074	3.95657	0.688099	0.637472	0.59712	-2.07997	-2.1111	-2.11036	-2.51344	-2.53336	-2.40889	0.976827	positive	1639
Cla97C03G063910	Cla97C03G063910.1	-0.28297	-0.143381	-0.13858	-0.133795	0.00283989	-0.0427769	0.131626	-0.0264247	-0.00879481	0.257157	0.182389	0.202709	-0.114404	-0.322581	-0.313747	-0.410881	-0.354926	-0.312239	0.11361	0.0762151	-0.0994604	0.603793	0.627587	0.507034	0.820368	positive	1640
Cla97C03G063940	Cla97C03G063940.1	-0.547041	-0.351975	-0.459325	-0.0251651	0.0191382	-0.0102456	0.0789623	0.0220439	0.0507838	0.449726	0.416985	0.356113	-1.02059	-1.13267	-1.01072	0.185796	0.182957	0.149546	0.363127	0.337596	0.323133	0.538164	0.527265	0.556394	0.921196	positive	1641
Cla97C03G064040	Cla97C03G064040.1	0.399106	0.36846	0.603223	0.237612	-0.00315863	-0.152424	0.116581	0.0616417	0.233694	-0.551595	-0.736532	-0.576607	0.607898	0.475175	0.576097	-0.24845	-0.101965	-0.269558	-0.0986701	-0.09964	-0.116876	-0.223813	-0.268145	-0.232052	0.724878	positive	1644
Cla97C03G064100	Cla97C03G064100.1	1.01	0.575107	0.888189	-0.39546	-0.230455	-0.391447	-0.476032	-0.214415	-0.787903	-0.00524908	-0.031551	0.0592145	0.130057	0.0988406	0.311153	0.317832	0.390698	0.30694	-0.113527	-0.152339	-0.131006	-0.365942	-0.413939	-0.378767	0.171038	positive	1645
Cla97C03G064110	Cla97C03G064110.1	0.0221311	0.00139386	0.113309	-0.206894	-0.257767	-0.264927	-0.374882	-0.22598	-0.236498	0.498707	0.499764	0.431643	-0.394053	-0.392571	-0.244245	-0.215322	-0.126155	-0.211505	0.154108	0.111375	0.160396	0.402	0.378256	0.377716	0.501334	positive	1646
Cla97C03G064150	Cla97C03G064150.1	-0.101081	-0.110378	-0.0599668	0.10712	0.125718	0.104443	0.0609278	-0.00257511	0.0288201	-0.05248	-0.0405814	-0.0599668	0.215348	0.170834	0.177196	0.0857877	0.0732494	0.0915208	-0.00469109	-0.00901363	0.0257758	-0.260258	-0.271604	-0.294145	0.117885	positive	1647
Cla97C03G064200	Cla97C03G064200.1	1.25208	1.36563	1.31543	-0.269531	-0.375503	-0.36019	-0.445343	-0.518736	-0.402138	-0.411127	-0.526041	-0.624531	4.76306	4.7173	4.75497	-1.09877	-1.1851	-1.07072	-1.54551	-1.46067	-1.58757	-2.12316	-2.035	-2.12883	0.99542	positive	1649
Cla97C03G064250	Cla97C03G064250.1	-0.128947	-0.238069	0.0672765	0.144401	0.054713	-0.0230558	0.259574	0.363967	0.129835	-0.283429	-0.212534	-0.133732	-0.863288	-0.879874	-0.756094	-0.0149355	-0.0807005	-0.0709647	0.246407	0.236794	0.257758	0.603025	0.658598	0.663275	0.0383984	positive	1651
Cla97C03G064340	Cla97C03G064340.1	-0.0212826	0.0448945	0.00208142	0.105475	0.0658338	0.0505081	0.0250731	-0.034593	-0.0405484	-0.0983857	-0.0495279	-0.0495279	0.17738	0.369957	0.194676	-0.0385616	0.0656388	0.091083	-0.129197	0.0179587	-0.0647639	-0.234459	-0.177078	-0.272634	0.499608	positive	1653
Cla97C03G064350	Cla97C03G064350.1	0.159041	0.131807	0.202072	-0.134898	-0.0960504	-0.0717262	-0.0286575	-0.0792836	-0.144379	0.0771076	0.0551859	-0.0702195	-0.0754174	-0.027197	-0.0585932	-0.0690297	-0.0665041	-0.0311945	-0.0246239	-0.0198264	-0.0367446	0.142055	0.108751	0.158325	0.0351569	positive	1654
Cla97C03G064380	Cla97C03G064380.1	-0.00496118	0.022492	-0.034435	0.0395655	0.0620204	0.0338968	0.0267794	0.0896062	0.12603	-0.120317	-0.128239	-0.112438	-0.580469	-0.580186	-0.483952	-0.255994	-0.197302	-0.0757769	0.262367	0.125826	0.122607	0.540708	0.581694	0.540477	-0.468605	negative	1655
Cla97C03G064390	Cla97C03G064390.1	-0.0749306	-0.142263	-0.0238298	-0.0856799	0.162896	-0.0612268	0.22262	0.189888	0.261913	-0.0718741	-0.202828	-0.174685	-0.223656	-0.303999	-0.235239	0.154907	0.208758	0.298588	0.152668	0.0770918	0.092108	0.00302411	-0.0698875	-0.154364	0.515645	positive	1656
Cla97C03G064430	Cla97C03G064430.1	-0.00166873	0.0271285	-0.0177557	-0.00312379	-0.0932277	-0.0207	0.0271285	0.0171147	0.0539636	0.0128018	0.0413144	-0.0429757	0.42937	0.462819	0.442798	-0.280559	-0.171233	-0.2172	-0.236925	-0.168434	-0.154397	0.00320678	-0.0422298	-0.0672157	0.0713072	positive	1657
Cla97C03G064480	Cla97C03G064480.1	-0.104114	-0.0625169	-0.0324596	-0.0777836	-0.0640363	-0.0280046	0.100982	0.0569267	0.125184	0.0315414	0.0763666	-0.0220858	-0.12954	-0.165803	-0.195162	-0.253625	-0.297423	-0.236534	0.00769818	0.0348506	-0.0477808	0.444816	0.398278	0.440225	0.463558	positive	1658
Cla97C03G064490	Cla97C03G064490.1	0.49948	0.540526	0.544568	0.0314349	-0.0500112	-0.0348567	-0.27012	-0.224705	-0.184015	-0.255993	-0.180676	-0.415631	1.22312	1.2273	1.17635	-0.847699	-0.643756	-0.890495	-0.59673	-0.539467	-0.54662	0.13426	0.163063	0.140671	0.725102	positive	1659
Cla97C03G064510	Cla97C03G064510.1	0.271219	0.172716	0.0985796	0.0530388	0.0530388	0.13082	0.0711511	0.0808105	0.0117958	-0.330107	-0.304732	-0.30833	0.843335	0.861658	0.765675	-0.301861	-0.103511	-0.19054	-0.371314	-0.33646	-0.335236	-0.351541	-0.21521	-0.264995	0.55073	positive	1660
Cla97C03G064590	Cla97C03G064590.1	-0.10992	-0.141804	-0.18766	0.0927419	0.0340195	0.0524522	0.223629	0.261906	0.245978	-0.16455	-0.181019	-0.125774	-0.768099	-0.707767	-0.725371	-0.00799848	0.0991492	0.0432556	0.375097	0.344176	0.452065	0.338146	0.277565	0.279781	0.528568	positive	1662
Cla97C03G064600	Cla97C03G064600.1	-0.307762	-0.441567	-0.368278	-0.0459633	-0.0336588	-0.0413368	-0.0724641	-0.180227	-0.192143	0.499328	0.581614	0.602458	0.033683	0.0259999	0.0552237	-0.191273	-0.210908	-0.20387	-0.0479533	0.00798986	0.0142997	0.202166	0.154356	0.160286	0.474378	positive	1663
Cla97C03G064610	Cla97C03G064610.1	0.583993	0.583007	0.57013	-0.106748	-0.0113542	-0.114723	-0.0613423	-0.0893567	-0.0659738	-0.352391	-0.532963	-0.402277	2.85054	2.82764	2.75248	-1.41559	-1.30785	-1.26286	-1.04871	-1.03902	-1.05961	-0.423428	-0.461882	-0.411703	0.820478	positive	1664
Cla97C03G064690	Cla97C03G064690.1	0.25937	0.287455	0.271648	0.0256296	0.116925	0.0838852	-0.0457025	-0.00811057	-0.0290412	-0.310871	-0.323744	-0.327444	0.602598	0.635887	0.677089	-0.185991	-0.131631	-0.189676	-0.2349	-0.283709	-0.178234	-0.215419	-0.257468	-0.238547	0.765203	positive	1668
Cla97C03G064700	Cla97C03G064700.1	0.0507436	0.00665588	0.0167296	0.0743607	0.101659	0.00665588	0.112436	0.171598	0.113777	-0.252053	-0.2888	-0.113764	-0.296111	-0.450928	-0.382639	0.104559	0.107671	0.0802679	0.115703	0.0904081	0.152592	0.17615	0.129865	0.172461	-0.16392	negative	1669
Cla97C03G064760	Cla97C03G064760.1	1.43169	1.45678	1.21653	-0.0266038	0.0327891	0.0207594	-0.609784	-0.758822	-0.37145	-0.948507	-1.01417	-0.429212	3.73698	3.75797	3.63383	-0.277387	-0.223928	-0.435903	-1.46874	-1.32755	-1.48689	-1.98731	-1.84952	-2.07154	0.974296	positive	1671
Cla97C03G064830	Cla97C03G064830.1	0.0153732	-0.0373071	0.0168094	-0.131212	-0.116967	-0.0888916	-0.0858056	-0.0643867	-0.0613526	0.185937	0.202439	0.165363	0.240851	0.203873	0.231473	-0.0162623	-0.0091127	-0.00660602	-0.0652992	-0.0764777	-0.0275605	-0.145599	-0.170566	-0.158714	-0.368045	negative	1673
Cla97C03G064850	Cla97C03G064850.1	0.505144	0.58843	0.56425	-0.0920422	-0.0619354	-0.0635044	-0.134286	-0.0824668	-0.116263	-0.263569	-0.594543	-0.249214	-0.241244	-0.259289	-0.236698	-0.111696	-0.112965	-0.112437	0.185225	0.150397	0.174133	0.193984	0.180968	0.18962	-0.833513	negative	1674
Cla97C03G064870	Cla97C03G064870.1	0.297515	0.111143	0.0961785	0.0769056	0.0838184	0.11924	0.0643785	0.139287	0.199083	-0.46909	-0.302993	-0.415467	0.938789	0.92553	0.985586	0.101006	0.245407	0.0813302	-0.379308	-0.290427	-0.320173	-0.575866	-0.76324	-0.948633	0.697526	positive	1675
Cla97C03G064890	Cla97C03G064890.1	0.0334077	0.110738	0.187962	0.121455	0.0684433	0.0362421	0.0475242	0.0262973	-0.0304002	-0.210182	-0.15418	-0.237307	0.537331	0.5571	0.511525	-0.0876441	-0.0814452	-0.0318412	-0.202007	-0.400058	-0.311251	-0.179823	-0.16981	-0.142077	0.492865	positive	1676
Cla97C03G064910	Cla97C03G064910.1	-0.144984	-0.048872	-0.0339526	0.158878	0.158878	0.182065	0.165356	0.170518	0.166648	-0.188927	-0.265278	-0.320329	-0.415522	-0.399055	-0.405427	0.153577	0.20852	0.123353	0.110235	0.110168	0.0634246	0.115639	0.155199	0.179889	0.192802	positive	1677
Cla97C03G064920	Cla97C03G064920.1	-0.0757232	-0.201394	-0.137191	0.0943733	0.0998484	0.0792086	-0.0361531	0.0512214	-0.173056	0.0943733	-0.0664948	0.270987	0.143053	0.211795	0.146454	-0.0163657	0.0422854	0.0267635	-0.0209775	-0.125043	-0.0606671	-0.122821	-0.144937	-0.0795395	-0.488801	negative	1678
Cla97C03G064930	Cla97C03G064930.1	-0.253707	-0.327339	-0.27665	0.339403	0.242187	0.270464	0.297002	0.423927	0.327749	-0.482827	-0.210587	-0.349621	-1.1756	-1.01798	-1.18385	0.169975	0.104894	0.183282	0.385707	0.326196	0.405058	0.588629	0.61237	0.60132	0.326172	positive	1679
Cla97C03G064950	Cla97C03G064950.1	-0.862417	-0.79491	-0.44738	-0.409019	-0.464762	-0.109985	-0.0318022	-0.0480856	0.108495	1.06601	1.10555	0.888305	-2.03079	-2.06989	-1.84852	0.850851	0.93248	0.879079	0.59588	0.581099	0.608247	0.533903	0.4575	0.510161	0.539701	positive	1681
Cla97C03G064980	Cla97C03G064980.1	0.451936	0.387122	0.43029	-0.114349	-0.0953867	-0.235404	-0.0130117	-0.0279157	0.0816722	-0.392413	-0.235404	-0.237135	-0.539811	-0.470722	-0.546834	-0.16488	-0.116537	-0.0915278	0.198369	0.171433	0.154105	0.435726	0.451375	0.519304	-0.83784	negative	1682
Cla97C03G064990	Cla97C03G064990.1	-0.77407	-0.967131	-1.10697	-0.119875	-0.233501	-0.132897	-0.140392	-0.17846	-0.134767	1.24547	1.32177	1.22082	-3.27548	-3.23509	-3.21109	0.660292	0.632276	0.650492	0.985384	0.99975	1.03187	1.62239	1.55683	1.58238	0.791119	positive	1683
Cla97C03G065050	Cla97C03G065050.1	0.206556	0.122693	0.190169	-0.0328574	-0.135567	-0.135567	-0.0225366	-0.00791949	0.010864	-0.133979	-0.00211387	-0.0597407	0.0759595	-0.0405711	0.126766	-0.436535	-0.441067	-0.400508	0.00756948	-0.022689	-0.011618	0.389748	0.361105	0.39184	0.220486	positive	1685
Cla97C03G065070	Cla97C03G065070.1	0.25976	0.30871	0.283846	-0.0673383	-0.126422	-0.121669	0.0691955	0.0440315	0.0691955	-0.228341	-0.250655	-0.240313	0.51731	0.535754	0.430109	0.115321	0.0342439	0.0755219	-0.184098	-0.185294	-0.196729	-0.386929	-0.376022	-0.379189	0.824232	positive	1686
Cla97C03G065160	Cla97C03G065160.1	-0.177119	-0.0811656	-0.0347438	0.0187759	-0.0157125	0.0230295	0.193741	0.10557	0.0329062	-0.0186241	-0.0540294	0.00737111	-1.04949	-1.01627	-1.11043	0.205564	0.272721	0.209196	0.351918	0.298335	0.393165	0.521494	0.471038	0.452771	0.598706	positive	1688
Cla97C03G065180	Cla97C03G065180.1	-0.557256	-0.41483	-0.246216	0.235458	0.193528	0.0485269	0.0413813	0.000698344	0.0255352	0.193528	0.234205	0.245442	-0.087152	-0.0558066	-0.114285	0.103667	0.123289	0.0855147	0.00263713	-0.0812244	0.00571972	0.0292682	-0.0283123	0.0166843	0.682023	positive	1689
Cla97C03G065190	Cla97C03G065190.1	-0.519317	-0.491715	-0.407968	0.283437	0.354177	0.294454	0.259897	0.254892	0.235967	-0.079309	-0.147251	-0.0372631	-0.707781	-0.727249	-0.735194	0.926214	0.828038	0.920024	0.364008	0.3091	0.284531	-0.510042	-0.47927	-0.472379	0.912905	positive	1690
Cla97C03G065250	Cla97C03G065250.1	0.768352	0.70414	0.828967	-0.0899096	-0.185732	-0.247889	-0.498996	-0.367	-0.314744	-0.131156	-0.170173	-0.29586	4.47908	4.46484	4.58865	-0.00332146	0.0541695	-0.046546	-1.95595	-1.87594	-1.96245	-2.35281	-2.62888	-2.76083	0.938862	positive	1692
Cla97C03G065260	Cla97C03G065260.1	-0.272894	0.0949255	-0.120015	0.0038071	-0.0136627	-0.0224775	0.280762	0.105752	0.238345	-0.0313466	-0.16974	-0.0934564	-0.0177935	0.0642827	-0.0203356	0.0326454	0.154935	-0.0414509	-0.166124	-0.195561	-0.0811493	0.103559	0.0500738	0.116919	-0.502982	negative	1693
Cla97C03G065280	Cla97C03G065280.1	-0.103903	0.0109688	-0.0183851	0.274487	0.340721	0.323276	-0.00216656	0.0524984	0.00222521	-0.18313	-0.434906	-0.261686	-0.436619	-0.375138	-0.3951	-0.0817144	-0.128315	-0.0946912	0.134709	0.131892	0.144941	0.374214	0.371211	0.354611	-0.474397	negative	1694
Cla97C03G065300	Cla97C03G065300.1	-0.106732	-0.1649	-0.0754016	-0.0645948	0.021963	-0.116265	-0.11786	-0.109902	-0.196572	0.385016	0.277494	0.267754	0.0666396	0.141471	0.106858	0.0467444	0.128154	0.0482523	-0.102705	-0.0724714	-0.0983844	-0.0772527	-0.0534866	-0.133818	-0.396837	negative	1696
Cla97C03G065320	Cla97C03G065320.1	0.431529	0.346443	0.443439	0.0175787	0.0505151	-0.112701	-0.224747	-0.280645	-0.245456	-0.236791	-0.0953659	-0.0938003	0.563824	0.631143	0.661139	-0.132806	-0.340984	-0.248479	-0.0979668	-0.0155113	-0.0818912	-0.242401	-0.230047	-0.466021	0.810662	positive	1697
Cla97C03G065380	Cla97C03G065380.1	-0.17458	-0.153134	0.013695	0.285455	0.29028	0.222478	0.0862361	0.119151	0.0166095	-0.356816	-0.246134	-0.103242	-0.781249	-0.698103	-0.769826	0.187826	0.192463	0.211768	0.445113	0.451206	0.469687	0.0846888	0.0674195	0.139007	0.389954	positive	1698
Cla97C03G065520	Cla97C03G065520.1	0.0574017	0.256126	0.112056	-0.174772	-0.0952205	-0.229786	0.065733	-0.0420345	0.00204309	0.0615733	-0.126517	0.113396	-0.0729609	-0.0118389	-0.0461727	-0.0695513	0.0650448	-0.120646	-0.0715209	-0.114748	0.00669698	0.191939	0.0751262	0.168632	0.267819	positive	1701
Cla97C03G065560	Cla97C03G065560.1	0.345106	0.0344148	-0.0210499	-0.535854	-0.416298	-0.223653	-0.414175	-0.186942	-0.17431	0.627645	0.551473	0.413644	-0.0516936	-0.0920809	-0.0376718	0.0634469	0.0656559	0.0509843	-0.142967	-0.202736	-0.184893	0.186658	0.164011	0.181286	0.523356	positive	1703
Cla97C03G065570	Cla97C03G065570.1	0.195597	0.140275	0.188004	-0.0219654	-0.0606379	-0.0117283	0.0621266	0.012835	-0.0337546	-0.221546	-0.128542	-0.120663	0.803091	0.781266	0.81908	-0.0323863	0.004301	-0.117561	-0.331108	-0.261951	-0.235504	-0.456252	-0.524254	-0.448722	0.869962	positive	1704
Cla97C03G065580	Cla97C03G065580.1	-0.0129202	0.062192	0.140269	0.0997028	0.0323274	0.0308897	0.0164337	-0.0519956	0.0135251	-0.135085	-0.104745	-0.0905932	0.00174896	-0.0360744	0.0262847	0.00873115	0.11337	0.0140842	-0.0916612	0.0586772	0.0409293	-0.101675	-0.0524271	0.0180125	0.352913	positive	1705
Cla97C03G065600	Cla97C03G065600.1	-0.315882	-0.281935	-0.278408	0.247221	0.135308	0.206264	0.0896323	0.149781	0.13927	-0.0387553	-0.0447354	-0.00776011	-0.0579774	-0.167805	-0.0379074	0.110996	0.114803	0.146931	0.0685751	0.0560949	0.0363152	-0.10962	-0.0938522	-0.0665538	0.800416	positive	1706
Cla97C03G065690	Cla97C03G065690.1	0.0877134	0.105233	-0.0727513	0.0713499	0.179636	-0.00611939	-0.161825	-0.169908	0.0534109	0.00109771	-0.101836	0.0139982	0.695956	0.567477	0.59122	-0.202795	-0.262136	-0.249026	-0.224291	-0.197494	-0.254705	-0.154087	-0.138437	-0.171681	0.190227	positive	1708
Cla97C03G065700	Cla97C03G065700.1	0.807513	0.693856	0.704225	0.119262	-0.320405	0.0864886	-0.374926	-0.477726	-0.320405	-0.651919	0.147168	-0.413132	-0.186828	-0.0442327	-0.0950421	-0.265377	-0.229631	-0.138864	-0.140637	-0.00768138	0.115813	0.454088	0.212603	0.325789	-0.46656	negative	1709
Cla97C03G065770	Cla97C03G065770.1	-0.0146404	0.0349904	0.0181658	0.0843181	0.0666992	0.0349904	-0.046734	0.00967929	-0.0204227	0.0025689	-0.130238	-0.0393771	0.401382	0.366319	0.411903	0.191611	0.20725	0.218175	-0.129319	-0.289284	-0.211254	-0.371627	-0.377355	-0.417801	0.601628	positive	1710
Cla97C03G065790	Cla97C03G065790.1	0.752105	0.453426	0.472518	1.00905	0.821254	0.865256	0.0961539	0.066304	0.0511441	-3.34372	-0.554282	-0.689212	0.287896	0.316037	0.298984	0.283434	0.0621699	0.161037	-0.196444	-0.202082	-0.292814	-0.356826	-0.143307	-0.218086	0.695364	positive	1711
Cla97C03G065800	Cla97C03G065800.1	0.226758	0.286905	0.10521	0.141565	0.163994	0.107934	-0.0126557	-0.0305221	-0.0531709	-0.308919	-0.476348	-0.150751	-0.14252	0.013444	-0.157908	0.0125366	-0.0171189	0.0330826	-0.0127385	-0.0725236	-0.00230253	0.133052	0.0886188	0.124377	-0.625546	negative	1712
Cla97C03G065830	Cla97C03G065830.1	0.119231	0.324248	0.237805	-0.189659	-0.163278	-0.192991	0.0320197	-0.147031	-0.140583	0.0852514	-0.00556765	0.0405564	-0.310121	-0.204319	-0.098237	-0.0427379	0.0204931	-0.0748906	-0.140564	0.0605976	-0.0904846	0.362083	0.269732	0.248447	-0.178332	negative	1713
Cla97C03G065860	Cla97C03G065860.1	0.200041	0.354551	0.259035	-0.00737562	0.0424511	-0.00159327	-0.0816812	-0.0589849	-0.0650024	-0.21249	-0.24457	-0.184379	-0.202642	-0.119964	-0.152915	-0.152575	-0.146389	-0.145006	0.017201	-0.00369642	0.0347278	0.296473	0.293303	0.281484	-0.80696	negative	1715
Cla97C03G065890	Cla97C03G065890.1	-0.648479	-0.596341	-0.395095	0.28781	0.219892	0.18793	0.349211	0.303407	0.282977	0.00485639	0.00485639	-0.00102617	-1.05623	-1.13173	-1.04176	0.506876	0.542568	0.52945	0.0942177	0.131174	0.141381	0.437653	0.423489	0.422911	0.861432	positive	1716
Cla97C03G065960	Cla97C03G065960.1	-0.0276914	-0.0887669	-0.0825417	-0.085651	-0.0640256	-0.104449	0.180751	0.216533	0.162522	-0.0397014	0.0565139	-0.123494	0.0239129	0.0353144	0.0345818	-0.00602629	0.0114661	-0.0259218	0.0096138	-0.0387855	-0.0218689	0.000382717	-0.0272042	0.00453498	-0.498112	negative	1717
Cla97C03G065970	Cla97C03G065970.1	0.158455	0.15975	0.157158	-0.00904196	-0.0760868	-0.0148769	-0.0295685	-0.0148769	-0.0533906	-0.0929607	-0.0760868	-0.108474	-0.026095	-0.0174231	0.0142515	-0.638553	-0.680538	-0.600341	0.188487	0.229859	0.182259	0.423875	0.462969	0.46125	-0.174424	negative	1718
Cla97C03G066090	Cla97C03G066090.1	-0.370984	-0.511749	-0.303609	-0.0961831	-0.0898624	-0.0788674	0.31925	0.228593	0.233642	0.129147	0.261099	0.279524	-1.51966	-1.4343	-1.4236	0.305295	0.420013	0.353709	0.56493	0.530304	0.560161	0.566422	0.510136	0.566592	0.880396	positive	1720
Cla97C03G066230	Cla97C03G066230.1	0.0915474	0.148678	0.108504	-0.239292	-0.24646	-0.228605	-0.562561	-0.389905	-0.522852	0.654068	0.534736	0.652142	-0.344557	-0.324371	-0.419227	0.00320501	-0.0108567	0.0585897	0.149958	0.0997406	0.151829	0.193766	0.224332	0.217591	0.0441388	positive	1724
Cla97C03G066240	Cla97C03G066240.1	-0.629768	-0.516774	-0.476843	0.158364	0.0900422	0.105353	0.319812	0.270038	0.260123	0.115013	0.161031	0.143609	-0.337136	-0.318744	-0.33808	0.215826	0.243402	0.205526	-0.0494623	-0.00271303	0.00159068	0.134217	0.117997	0.127576	0.806984	positive	1725
Cla97C03G066270	Cla97C03G066270.1	-0.315605	-0.265668	-0.195529	0.293947	0.278402	0.219509	0.107575	0.131733	0.176288	-0.095548	-0.1479	-0.187204	0.111366	0.227732	0.0717681	-0.212325	-0.124033	-0.131885	-0.0174591	-0.253066	-0.140697	0.181468	0.106864	0.180266	-0.883091	negative	1726
Cla97C03G066280	Cla97C03G066280.1	-0.418588	-0.434291	-0.368703	0.0533896	-0.00403872	0.0249612	0.160506	0.150013	0.218144	0.215631	0.267514	0.135461	-0.0179066	-0.0142656	0.0369073	-0.183064	-0.231246	-0.187162	-0.0803311	-0.0385517	0.00366061	0.262374	0.221743	0.227842	0.245054	positive	1727
Cla97C03G066330	Cla97C03G066330.1	-0.0896733	0.0201015	-0.0621926	0.13931	0.0371414	0.161495	0.0300659	-0.0411748	0.0329003	-0.138264	-3.6129e-05	-0.0896733	1.11671	1.09353	1.11712	0.136256	0.230714	0.110017	-0.486228	-0.449092	-0.392261	-0.766077	-0.864591	-0.846092	0.0927261	positive	1729
Cla97C03G066350	Cla97C03G066350.1	-0.117724	-0.112939	-0.0628622	-0.100256	-0.0798808	-0.127342	-0.21863	-0.316086	-0.213499	0.417943	0.463506	0.467771	-0.0674848	-0.123203	-0.00621627	-0.157398	-0.203521	-0.187769	0.162922	0.0410799	0.0757754	0.165119	0.151208	0.149488	0.501291	positive	1730
Cla97C03G066360	Cla97C03G066360.1	-0.107453	-0.163101	-0.25859	0.07266	0.0079038	0.0321753	0.128025	0.109358	0.186442	-0.0857816	0.0518615	0.026501	-1.19398	-0.988219	-1.1869	0.498412	0.593531	0.629172	0.272733	0.402953	0.129754	0.241443	0.295459	0.305634	0.770453	positive	1731
Cla97C03G066380	Cla97C03G066380.1	1.38077	0.244748	0.966144	-0.40694	0.235208	0.0423672	-0.74173	0.0915372	-0.313964	-0.981271	0.0501613	-0.567028	2.94503	2.92127	3.02328	-0.36591	-0.374884	-0.452679	-0.822521	-0.916546	-0.757921	-1.70609	-1.80573	-1.6873	0.796912	positive	1733
Cla97C03G066410	Cla97C03G066410.1	-0.125616	-0.240295	-0.270006	-0.00756023	0.0473237	0.101561	-0.104994	-0.151408	-0.112891	0.213149	0.304915	0.345821	-0.168885	-0.108115	-0.145816	0.0112367	0.0186535	0.010063	-0.0315748	-0.099169	-0.0262688	0.21065	0.175663	0.153562	0.924007	positive	1734
Cla97C03G066470	Cla97C03G066470.1	-0.37084	-0.340705	-0.350054	-0.160461	0.0143905	-0.158817	0.159821	0.200097	0.239279	0.373719	0.17945	0.214122	-2.12308	-2.16665	-2.1945	0.145423	0.128156	0.169416	1.05348	1.10826	1.1105	0.895511	0.93945	0.934024	0.914921	positive	1736
Cla97C03G066480	Cla97C03G066480.1	-0.492852	-0.501156	-0.377534	0.275237	0.271586	0.215685	0.162795	0.210609	0.15489	0.0379808	0.0119595	0.0307996	1.66977	1.69521	1.67984	-0.295037	-0.34087	-0.303283	-0.553144	-0.561662	-0.533575	-0.814736	-0.837293	-0.805223	-0.880013	negative	1737
Cla97C03G066520	Cla97C03G066520.1	-0.0377731	-0.0721068	-0.0377731	-0.0377731	-0.0362987	-0.0995585	0.0453446	0.0592034	0.0919313	0.0158003	0.0946255	0.0143782	-0.780388	-0.753622	-0.679693	-0.315672	-0.18717	-0.382401	0.537199	0.620524	0.626585	0.459491	0.490145	0.365001	0.866244	positive	1738
Cla97C03G066530	Cla97C03G066530.1	0.306904	0.192608	0.266161	-0.175454	-0.163945	-0.288732	-0.0843057	0.14052	0.00142418	-0.00589545	-0.0688921	-0.120395	-0.144829	-0.153986	-0.175555	-0.258927	-0.328034	-0.214845	0.00225232	0.108495	0.0408448	0.340416	0.417423	0.366742	-0.0362753	negative	1739
Cla97C03G066550	Cla97C03G066550.1	0.439556	0.514826	0.403794	-0.132768	-0.225987	-0.217259	-0.122953	-0.060738	-0.0237438	-0.179472	-0.224237	-0.17102	-0.297731	-0.308204	-0.315826	-0.907601	-0.757732	-0.85889	0.220319	0.274181	0.155407	0.844175	0.965126	0.986776	-0.246419	negative	1740
Cla97C03G066590	Cla97C03G066590.1	-0.230484	-0.238926	-0.245715	-0.269732	-0.0955849	-0.0940525	-0.0296559	0.1178	0.0680234	0.417608	0.267156	0.333565	-0.534844	-0.568303	-0.470513	-0.0401729	-0.000738169	-0.00395956	0.115146	0.0789405	0.149745	0.462988	0.39272	0.418991	0.883339	positive	1743
Cla97C03G066600	Cla97C03G066600.1	-0.1742	-0.195622	-0.118057	0.0565803	0.00261493	0.0745882	0.060756	-0.0251441	0.00839149	0.0411652	0.304434	-0.0355073	-0.173069	-0.206548	-0.170375	0.164868	0.260685	0.202958	0.0530067	0.0273303	0.0324392	-0.0799561	-0.047414	-0.0639247	0.466751	positive	1744
Cla97C03G066640	Cla97C03G066640.1	-0.214063	-0.241478	-0.185493	-0.0811954	-0.0369889	-0.088956	-0.0858467	0.00881478	-0.214063	0.379924	0.277413	0.481931	-0.237351	-0.2279	-0.250539	-0.163015	-0.123811	-0.1368	0.0587172	0.0778167	0.018426	0.317311	0.342553	0.324591	0.893387	positive	1746
Cla97C03G066780	Cla97C03G066780.1	-0.18636	-0.199734	-0.216628	0.164887	0.186894	0.195858	0.0338909	0.0677718	0.0209776	-0.0229212	-0.00226873	-0.0423668	-0.390278	-0.254716	-0.324885	0.47864	0.526272	0.521686	-0.14679	-0.0435962	-0.098231	-0.0399768	-0.0633888	-0.164736	0.909083	positive	1749
Cla97C03G066790	Cla97C03G066790.1	0.059605	0.315746	0.257398	0.303784	0.288082	0.318127	0.0206693	-0.00142443	0.00154103	-0.354484	-0.629321	-0.579723	0.540816	0.548543	0.536307	-0.319466	-0.299832	-0.319087	-0.33018	-0.0512485	-0.123652	-0.00663004	-0.0747927	-0.100778	0.121636	positive	1750
Cla97C03G066850	Cla97C03G066850.1	-0.356823	-0.218473	-0.0479847	0.166658	0.100407	0.0591452	0.0730307	0.221298	0.107171	0.0785477	-0.100007	-0.08297	-0.559186	-0.431365	-0.588946	0.242136	0.0847382	0.14692	0.0703025	0.0258099	0.0765162	0.292048	0.327843	0.313183	0.588586	positive	1751
Cla97C03G066870	Cla97C03G066870.1	0.157892	0.29587	0.236581	-0.0906062	-0.0180785	0.0537837	0.1644	-0.046353	0.052381	-0.218534	-0.232144	-0.355191	-0.215274	-0.0720786	-0.186582	-0.0577128	-0.179149	-0.17846	0.0123143	-0.027749	-0.0942675	0.322288	0.340677	0.335994	-0.794477	negative	1753
Cla97C03G066980	Cla97C03G066980.1	1.24652	1.13133	1.3571	-0.294692	-0.262225	-0.511282	-0.49233	-0.24032	-0.319531	-0.432401	-0.381386	-0.800788	4.48761	4.49245	4.45761	0.167618	0.0991085	0.159199	-2.2974	-2.05045	-1.85305	-2.67455	-2.31358	-2.67455	0.937206	positive	1755
Cla97C03G067040	Cla97C03G067040.1	-0.136948	0.0439052	-0.0792013	-0.0295779	0.0155327	0.0854444	0.203334	0.0112283	0.0481133	-0.0639829	-0.0504222	-0.0474259	-0.245465	-0.22826	-0.130998	-0.0513913	-0.145749	-0.107992	-0.206109	-0.17873	-0.20421	0.475628	0.465342	0.557935	-0.364681	negative	1758
Cla97C03G067080	Cla97C03G067080.1	-0.0701602	-0.0166107	-0.0490986	0.101111	0.0532222	0.01087	0.0643093	0.0875901	0.0476466	-0.0686456	-0.065621	-0.0946132	0.0469765	0.224483	0.11183	-0.328548	-0.106254	-0.284512	-0.0572678	-0.0538858	-0.115308	0.193732	0.178363	0.19039	-0.7757	negative	1759
Cla97C03G067230	Cla97C03G067230.1	0.848905	0.902058	0.800055	0.188194	0.174322	0.158907	-0.217212	-0.319493	-0.209916	-0.852409	-0.827073	-0.646337	0.0771548	0.0884116	0.0489922	0.223667	0.152791	0.252054	-0.102782	-0.110909	-0.0369918	-0.225712	-0.170154	-0.196522	0.727152	positive	1763
Cla97C03G067250	Cla97C03G067250.1	0.237628	0.338322	0.208786	0.0580486	0.0955233	0.00797483	-0.0651832	-0.148727	-0.0214389	-0.297308	-0.279431	-0.134195	0.497398	0.397946	0.485252	-0.485999	-0.495544	-0.45925	-0.0800945	-0.410797	-0.268886	0.298593	0.274124	0.247257	0.166813	positive	1764
Cla97C03G067260	Cla97C03G067260.1	0.0038167	0.0616734	0.0309171	0.00669347	-0.0252709	-0.0444972	0.0713235	0.114635	0.0740689	-0.0730664	-0.162334	-0.0579595	-0.816176	-0.787913	-0.894166	-0.113024	-0.103708	-0.143327	0.311873	0.412705	0.390854	0.540882	0.602676	0.599324	-0.297814	negative	1765
Cla97C03G067270	Cla97C03G067270.1	0.533041	0.482491	0.472606	0.274439	0.254065	0.209792	-0.0440159	-0.0330209	0.0535212	-0.810182	-0.598556	-0.794181	1.21102	1.17967	1.07249	0.071581	0.0969869	0.175786	-0.316022	-0.303273	-0.296765	-0.921428	-1.0623	-0.907754	0.913053	positive	1766
Cla97C03G067320	Cla97C03G067320.1	-0.131419	-0.131419	-0.00377165	0.063012	0.0392115	0.0740778	0.0671716	0.063012	-0.0110617	-0.00814125	-0.00668325	-0.013988	0.714226	0.668899	0.662598	-0.0783872	-0.145993	-0.137128	-0.266171	-0.278887	-0.227125	-0.245594	-0.297481	-0.368959	-0.706328	negative	1768
Cla97C03G067330	Cla97C03G067330.1	0.375116	0.434884	0.601615	0.229877	0.0923739	0.251363	-0.107091	-0.164511	-0.257843	-0.430225	-0.27943	-0.74613	-0.166339	-0.103259	-0.0118134	0.0407104	0.040819	0.0264954	-0.0127877	-0.0437784	-0.0851785	0.10109	0.112759	0.101281	-0.557882	negative	1769
Cla97C03G067340	Cla97C03G067340.1	-0.204166	-0.204166	-0.0848666	-0.0412591	-0.0457096	-0.0323992	0.139487	0.101084	0.0957057	0.0835309	0.0957057	0.0970521	0.0304922	0.0100753	0.0460909	-0.249484	-0.23287	-0.310913	0.0490257	-0.0074644	-0.04148	0.247314	0.21205	0.247163	0.344998	positive	1770
Cla97C03G067350	Cla97C03G067350.1	0.0516205	0.323083	0.433163	0.0202873	0.0417244	0.0417244	0.0289004	-0.157217	-0.0718626	-0.0325002	-0.200187	-0.478738	0.758363	0.807688	0.892988	-0.231435	-0.217242	-0.240837	-0.231316	-0.282123	-0.263702	-0.307667	-0.344798	-0.339919	0.753507	positive	1771
Cla97C03G067450	Cla97C03G067450.1	-0.639748	-0.401847	-0.411942	-0.011159	0.0650653	0.0386201	0.790044	0.663071	0.736206	-0.21702	-0.287763	-0.323526	-1.24862	-1.26006	-1.28124	-0.171201	-0.162287	-0.169081	0.9149	0.915292	0.928999	0.517564	0.506842	0.508886	0.740373	positive	1773
Cla97C03G067570	Cla97C03G067570.1	-1.05746	-1.02512	-0.699992	-0.109084	-0.105697	-0.138196	0.310186	0.306377	0.296173	0.789078	0.751292	0.682443	-2.26287	-2.17909	-2.18513	0.363154	0.345106	0.346262	0.730404	0.749472	0.724267	1.11097	1.11981	1.13765	0.945781	positive	1775
Cla97C03G067580	Cla97C03G067580.1	0.229345	0.154417	0.215431	-0.0596019	0.02985	-0.0642234	-0.269488	-0.0367136	-0.287388	0.12088	-0.117663	0.0851542	0.110194	0.0986484	0.0552273	-0.146919	-0.136253	-0.0999857	-0.0609985	-0.0630965	-0.0426718	0.0569883	0.106107	0.122759	0.517007	positive	1776
Cla97C03G067600	Cla97C03G067600.1	0.224608	0.229697	0.338516	-0.219611	-0.170181	-0.256492	-0.438251	-0.396488	-0.553728	0.378012	0.422024	0.441894	0.721808	1.05415	0.884025	0.746784	1.10531	0.317378	-0.972263	-1.21225	-0.75415	-0.747872	-0.407513	-0.735412	0.225114	positive	1777
Cla97C03G067640	Cla97C03G067640.1	-0.283237	-0.435449	-0.364265	-0.15755	-0.309744	-0.281362	-0.173109	-0.302121	-0.242543	0.739102	0.938887	0.87139	-0.30623	-0.274816	-0.311018	0.181397	0.236914	0.167326	0.0663028	0.0166741	0.0759335	0.0703628	0.0363807	0.0407722	0.235761	positive	1778
Cla97C03G067650	Cla97C03G067650.1	-0.183114	-0.176533	-0.137671	0.309362	0.279761	0.112525	0.157489	0.107142	0.120563	-0.221543	-0.196365	-0.171618	0.661669	0.680584	0.696191	-0.0193819	0.103545	-0.127736	-0.185914	-0.290507	-0.218174	-0.458113	-0.444146	-0.398017	-0.16322	negative	1779
Cla97C03G067680	Cla97C03G067680.1	-1.12727	-0.570737	-1.14854	-0.367959	-0.250245	-0.34937	0.524166	0.363174	0.444731	0.844301	0.736281	0.901471	-2.16779	-2.14711	-2.08386	0.458254	0.496775	0.444608	0.691253	0.676315	0.768864	0.890093	0.996181	0.976414	0.852499	positive	1780
Cla97C03G067700	Cla97C03G067700.1	0.257476	0.168801	0.101564	0.11098	0.000967602	-0.0611252	-0.0885769	-0.0702178	0.0563262	-0.234264	-0.157966	-0.0839651	1.56963	1.60428	1.5984	-0.0429626	0.0536185	-0.0503988	-0.695155	-0.617929	-0.628348	-1.02779	-0.857858	-0.905479	0.846887	positive	1781
Cla97C03G067740	Cla97C03G067740.1	0.320938	0.234422	0.218233	-0.126733	-0.0968237	-0.0736412	-0.0690491	0.00250419	0.00975758	-0.118802	-0.115642	-0.185163	0.135845	0.0933582	0.0613162	0.115404	0.137513	0.118211	-0.152837	-0.222038	-0.239064	-0.0576254	0.00964012	0.000277538	0.220054	positive	1782
Cla97C03G067750	Cla97C03G067750.1	0.544831	0.278985	0.438687	-0.0321278	-0.0948303	-0.101096	-0.157115	-0.0777384	-0.171878	-0.465237	0.0193238	-0.181805	0.703697	0.806156	0.689032	-0.0762439	-0.0544845	-0.0706449	-0.169091	-0.271552	-0.237206	-0.475892	-0.460185	-0.383588	0.887207	positive	1783
Cla97C03G067770	Cla97C03G067770.1	0.534388	0.269326	0.417306	-0.251347	-0.146929	-0.135601	-0.132381	-0.0180175	-0.322959	-0.204943	-0.0404781	0.0316348	-0.814888	-0.65301	-0.734649	0.220182	0.266986	0.138408	0.367113	0.371273	0.253023	0.143541	0.208781	0.233242	-0.897404	negative	1784
Cla97C03G067960	Cla97C03G067960.1	0.533657	0.70554	0.739209	0.00314268	-0.00889239	-0.0134315	-0.0533809	-0.113833	-0.0912657	-0.32141	-0.648506	-0.73083	0.70081	0.758707	0.686705	-0.151427	-0.133325	-0.177622	-0.221416	-0.262923	-0.262554	-0.277632	-0.314541	-0.344781	0.9041	positive	1787
Cla97C03G068150	Cla97C03G068150.1	-0.272592	-0.272592	-0.246845	-0.0351859	-0.0997838	0.00965334	0.222452	0.288504	0.217528	0.0805173	0.0859308	0.0224144	-1.09512	-1.13193	-1.11273	0.0439957	0.0118312	-0.0358758	0.455757	0.41948	0.368522	0.71951	0.696647	0.659911	0.855486	positive	1790
Cla97C03G068200	Cla97C03G068200.1	-0.223081	-0.087755	-0.228219	0.215691	0.220726	0.225744	0.340065	0.259167	0.36302	-0.364865	-0.305745	-0.41475	-0.876502	-0.800975	-0.878819	-0.0162211	-0.0695441	-0.0636668	0.409489	0.341646	0.433116	0.521456	0.505141	0.494881	0.147019	positive	1792
Cla97C03G068230	Cla97C03G068230.1	0.0541908	0.00888168	0.0373662	0.0913438	0.104865	0.111578	0.0331292	0.0652992	0.0415908	-0.153869	-0.19304	-0.201336	0.306031	0.26455	0.375531	0.000378087	0.0378181	-0.00658968	-0.147847	-0.118073	-0.104543	-0.218937	-0.19459	-0.193728	0.493333	positive	1794
Cla97C03G068240	Cla97C03G068240.1	-0.264636	-0.533084	-0.400519	-0.0261236	0.0409906	-0.0109372	0.0115468	0.0366121	0.0219206	0.415011	0.457121	0.252097	-0.910315	-0.808303	-0.897657	-0.0149478	0.0613374	0.0101249	0.31038	0.266077	0.351869	0.559178	0.516428	0.555829	0.909425	positive	1795
Cla97C03G068320	Cla97C03G068320.1	0.188218	0.205214	0.182948	-0.44965	-0.447605	-0.362308	-0.205497	-0.265471	-0.219386	0.454099	0.492947	0.426492	0.232203	0.147832	0.222263	-0.429579	-0.498981	-0.474833	-0.0457924	-0.0316714	-0.071842	0.307663	0.32455	0.318188	0.935151	positive	1796
Cla97C03G068350	Cla97C03G068350.1	-0.407385	-0.368338	-0.322835	-0.022342	0.0644075	0.0384901	-0.190942	-0.1358	-0.160603	0.540221	0.498582	0.466544	0.110138	0.0812855	0.121674	0.111102	0.14106	0.100268	0.0710224	-0.0347187	-0.0138934	-0.22487	-0.238561	-0.224507	-0.83092	negative	1797
Cla97C03G068360	Cla97C03G068360.1	0.719092	0.723656	0.570944	-0.102273	-0.1333	-0.158275	-0.1854	-0.216539	-0.156596	-0.482724	-0.416949	-0.161638	2.99936	2.81113	3.09348	-0.448597	-0.166716	0.0539151	-1.46172	-1.40217	-1.35713	-1.34377	-1.30369	-1.47409	0.950416	positive	1798
Cla97C03G068390	Cla97C03G068390.1	0.473832	-0.0159734	0.47799	-0.104899	0.0144003	0.139096	0.0300587	0.0129683	-0.0878983	-0.568417	0.109923	-0.48108	1.54267	1.53835	1.57556	-0.0806621	-0.0873539	0.0300104	-0.396522	-0.435147	-0.388041	-1.13213	-1.10818	-1.05854	0.725641	positive	1799
Cla97C04G068590	Cla97C04G068590.1	-0.265019	-0.1876	-0.313928	-0.441896	-0.329317	-0.400674	-0.15125	-0.125835	-0.139334	0.808011	0.725704	0.821138	-0.177035	-0.187593	-0.185156	-0.19812	-0.169911	-0.189492	0.0296852	-0.0267962	-0.0488702	0.418881	0.351059	0.38335	0.979888	positive	1803
Cla97C04G068640	Cla97C04G068640.1	0.291719	0.25233	0.236789	-0.282629	-0.314711	-0.331989	-0.598504	-0.521602	-0.621925	0.62985	0.554544	0.706129	0.441337	0.458147	0.389526	-0.174763	-0.263868	-0.133276	-0.119351	-0.0594535	-0.149673	-0.158024	-0.115165	-0.115437	0.32172	positive	1805
Cla97C04G068700	Cla97C04G068700.1	-0.0909903	-0.130432	-0.0541143	0.0111369	0.228757	0.157183	0.207402	0.331034	0.170227	-0.259166	-0.332706	-0.238332	1.59285	1.51339	1.60896	0.904404	0.689702	0.879102	-0.544339	-0.493709	-0.608559	-1.93791	-1.79422	-1.80968	0.313035	positive	1806
Cla97C04G068840	Cla97C04G068840.1	0.128378	0.182267	0.314833	0.472374	0.284357	0.457153	0.0067106	0.13249	0.0435725	-0.567094	-0.491316	-0.963725	-0.300114	-0.122403	-0.33146	0.197199	0.317093	0.202898	-0.0526084	-0.0581323	0.0270313	0.160887	-0.0313722	-0.0090189	0.0381731	positive	1807
Cla97C04G068870	Cla97C04G068870.1	-0.260608	0.179775	-0.0614733	-0.502269	0.0116674	-0.39596	-0.0978789	-0.0274896	-0.366696	0.746551	0.0439898	0.730392	0.558825	0.499776	0.534778	-0.0558373	-0.0852405	-0.119673	-0.197864	-0.273732	-0.226792	-0.153103	-0.226872	-0.254265	-0.149138	negative	1808
Cla97C04G068930	Cla97C04G068930.1	0.0941268	0.171521	0.0810575	-0.489391	-0.370917	-0.401164	-0.355042	-0.1189	5.339e-05	0.80895	0.247575	0.332129	-0.211528	-0.22573	-0.215146	-0.157327	-0.100813	-0.155463	0.0491425	0.0425185	0.028893	0.300738	0.316458	0.328256	0.57561	positive	1810
Cla97C04G069020	Cla97C04G069020.1	-0.141746	-0.14015	-0.110142	-0.0761582	-0.0822778	-0.107019	0.0826986	0.0689586	0.0703385	0.133749	0.191956	0.109792	-0.0817105	-0.0152078	-0.0238949	-0.21326	-0.203521	-0.278183	0.00612506	0.000927812	0.0144216	0.290422	0.282467	0.221414	0.799793	positive	1813
Cla97C04G069070	Cla97C04G069070.1	0.773971	0.603936	0.583968	-0.0842851	-0.0858837	-0.00502187	-0.466156	-0.253611	-0.474507	-0.317905	-0.188622	-0.0858837	3.29626	3.26369	3.30461	-0.348584	-0.357486	-0.324501	-0.955278	-0.838083	-0.88551	-1.94258	-2.12235	-2.09019	0.905357	positive	1814
Cla97C04G069140	Cla97C04G069140.1	-0.200449	-0.200449	-0.0719821	-0.062793	-0.0476066	-5.72081e-05	-0.053662	-0.0370704	-0.106186	0.326832	0.22921	0.224213	-0.046249	0.0497925	0.0377583	-0.262852	-0.281228	-0.101157	0.0957656	-0.0466232	0.0454109	0.227632	0.13718	0.144571	0.535589	positive	1816
Cla97C04G069210	Cla97C04G069210.1	0.0505566	0.0477607	0.212858	-0.0612011	-0.018088	-0.0901627	0.165926	-0.0239586	-0.0357719	-0.161168	0.00803798	-0.0947892	-0.35504	-0.430089	-0.39045	0.0815677	-0.00195964	0.0767444	0.083493	0.0965086	0.0667889	0.271673	0.265747	0.235016	-0.633593	negative	1817
Cla97C04G069250	Cla97C04G069250.1	-0.501187	-0.548143	-0.374606	-0.216269	-0.235355	-0.277895	0.321387	0.268172	0.26694	0.518626	0.460509	0.317821	-3.68243	-3.7813	-3.69693	0.0523556	-0.0262323	0.0631954	1.0535	1.02943	0.964195	2.66441	2.64748	2.71234	0.907135	positive	1818
Cla97C04G069340	Cla97C04G069340.1	0.0353517	0.208629	0.128641	0.121884	0.134024	0.0525098	0.152709	-0.0218649	0.102793	-0.409233	-0.325575	-0.179867	0.00271116	0.0998492	0.108565	0.0129513	0.0722892	0.00107432	0.0687077	-0.0952422	-0.0483943	-0.083795	-0.169504	0.0307873	0.736723	positive	1819
Cla97C04G069390	Cla97C04G069390.1	-0.0430809	-0.0251032	-1.21748e-05	0.0403859	0.0346836	0.0260875	0.093463	0.0975713	0.0975713	-0.155922	-0.0797227	-0.0859212	-0.429575	-0.437612	-0.535384	-0.0240637	-0.0582267	0.0110282	0.219447	0.176701	0.176148	0.283792	0.277691	0.340053	-0.0505045	negative	1821
Cla97C04G069410	Cla97C04G069410.1	0.396162	0.344187	0.31396	-0.0917088	0.0504561	-0.0367424	-0.12636	-0.0979475	-0.0442525	-0.188246	-0.306083	-0.213425	0.533601	0.38199	0.373015	-0.246234	-0.195853	-0.256736	0.0940816	-4.87451e-05	-0.166097	-0.167685	-0.287208	-0.0628249	0.845582	positive	1822
Cla97C04G069420	Cla97C04G069420.1	-0.452614	-0.49502	-0.394118	0.121028	0.0830957	0.131685	0.292289	0.300577	0.318179	0.0098896	0.0679166	0.0170923	-0.757475	-0.779073	-0.821814	0.244353	0.214095	0.280552	0.221804	0.193008	0.255302	0.31429	0.322678	0.312279	0.902469	positive	1823
Cla97C04G069430	Cla97C04G069430.1	-0.641653	-0.679435	-0.595777	0.151986	0.1667	0.183899	0.330104	0.328915	0.30372	0.177308	0.139834	0.1344	-0.37263	-0.385141	-0.375621	0.343204	0.380283	0.343187	0.12121	0.0919823	0.123516	-0.0560151	-0.114422	-0.0995526	0.799635	positive	1824
Cla97C04G069480	Cla97C04G069480.1	-0.109416	-0.0468457	0.0485022	0.0720739	0.0789341	0.0651809	0.0116895	0.0554751	0.0857618	-0.0393976	-0.114102	-0.107857	-0.156146	-0.225885	-0.244218	-0.109488	-0.100805	-0.110931	0.0957025	-0.0487232	0.107134	0.28771	0.246348	0.259301	-0.402169	negative	1825
Cla97C04G069500	Cla97C04G069500.1	0.436789	0.499548	0.491196	-0.247166	-0.268279	-0.329833	-0.266508	-0.0683412	-0.0745264	0.0740635	-0.139502	-0.107441	0.469538	0.430524	0.416602	0.174766	0.162927	0.20913	-0.0991661	-0.117727	-0.109657	-0.4884	-0.524689	-0.523847	0.483323	positive	1826
Cla97C04G069510	Cla97C04G069510.1	0.0534195	0.135413	0.134084	0.0715844	0.0618317	0.0660195	-0.0157049	-0.171318	-0.182867	-0.0127576	-0.080573	-0.0591313	-0.317478	-0.154378	-0.269836	-0.130464	0.010121	-0.0520432	-0.105682	0.00557475	0.00563578	0.37151	0.362798	0.274242	-0.509307	negative	1827
Cla97C04G069610	Cla97C04G069610.1	0.342631	0.280632	0.335744	0.0349444	-0.0111336	-0.0228868	-0.0273191	-0.0754635	-0.0481848	-0.330869	-0.218485	-0.25961	0.612562	0.580044	0.637662	-0.210533	-0.143011	-0.172819	-0.305547	-0.285108	-0.380143	-0.131668	-0.0734927	-0.127945	0.78515	positive	1832
Cla97C04G069620	Cla97C04G069620.1	0.29038	0.284489	0.317173	0.0308686	-0.16964	0.0504403	-0.181006	0.0642593	-0.103261	-0.227388	0.0124539	-0.368769	-0.121888	-0.159624	-0.263632	0.167883	0.0393165	0.1279	-0.0716608	-0.0187813	-0.0509444	0.151274	0.10557	0.0945878	-0.633124	negative	1833
Cla97C04G069860	Cla97C04G069860.1	0.0861856	0.179977	0.199036	0.0276899	0.113228	0.0683319	-0.00974737	-0.0708308	-0.0511815	-0.104706	-0.229953	-0.20803	0.29357	0.236294	0.309728	0.559298	0.56739	0.586249	-0.0498588	-0.00474514	-0.0861271	-0.792764	-0.787248	-0.831786	0.843007	positive	1837
Cla97C04G069870	Cla97C04G069870.1	-0.0382993	0.00653999	0.0403217	0.112234	0.18954	0.0500275	-0.0694858	0.026342	-0.0106522	-0.0815461	-0.144988	-0.080033	0.448398	0.448024	0.51038	-0.106043	0.0529826	-0.073814	-0.275627	-0.216649	-0.221304	-0.150902	-0.179884	-0.235562	0.245381	positive	1838
Cla97C04G069890	Cla97C04G069890.1	0.199871	0.566627	0.407882	-0.213	-0.381843	-0.351023	-0.187252	-0.542307	-0.537962	0.341036	0.27218	0.42579	0.0666023	0.0830753	0.16111	-0.113914	-0.0570084	-0.130997	-0.0758399	-0.158399	-0.0328978	0.139476	-0.000347702	0.119141	0.868892	positive	1839
Cla97C04G069900	Cla97C04G069900.1	-0.571356	-0.703551	-0.538492	0.0493562	0.0933572	0.108653	-0.035227	0.017295	-0.169677	0.604712	0.578984	0.565946	0.479244	0.440982	0.570168	-0.0294538	-0.0651326	-0.0136812	-0.217591	-0.113046	-0.197187	-0.295957	-0.254694	-0.303651	-0.877286	negative	1840
Cla97C04G070050	Cla97C04G070050.1	0.0272048	-0.113147	0.196181	-0.21717	-0.0427577	-0.00444082	0.00714716	0.102059	-0.300426	0.18347	0.07203	0.0898497	-0.103231	-0.143662	-0.18958	-0.210116	-0.255402	-0.190018	0.115677	0.0866023	0.0545765	0.297216	0.305709	0.232228	0.362791	positive	1842
Cla97C04G070130	Cla97C04G070130.1	-0.143562	-0.46996	-0.0554315	0.00584182	0.0305039	-0.013306	0.093821	0.125141	0.0362459	-0.0222299	0.309511	0.103425	-0.670189	-0.637106	-0.736996	0.301327	0.278679	0.28241	0.246539	0.19876	0.214636	0.173447	0.190701	0.157792	0.675317	positive	1843
Cla97C04G070160	Cla97C04G070160.1	0.185237	0.209744	0.199476	-0.0169178	-0.015422	-0.140273	-0.246813	-0.225904	-0.21728	0.0856079	0.166908	0.0156367	-1.02525	-0.938948	-1.02133	0.0159821	0.084411	-0.00843499	0.252624	0.160974	0.230121	0.751377	0.739309	0.759162	-0.426671	negative	1844
Cla97C04G070170	Cla97C04G070170.1	-0.0152876	-0.134193	-0.053844	0.581798	0.652475	0.506421	0.0443364	0.0703837	0.0311342	-0.604823	-0.625581	-0.45282	-0.182107	-0.18134	-0.158029	0.710602	0.700079	0.785445	-0.186675	-0.138635	-0.180303	-0.378798	-0.407228	-0.383013	0.911412	positive	1845
Cla97C04G070190	Cla97C04G070190.1	0.0278734	0.0135891	0.000611294	0.0135891	0.0221766	-0.0676069	-0.018343	0.0250278	0.050438	-0.00374073	-0.00810592	-0.0555088	0.719184	0.785374	0.67866	0.0307284	0.0201439	-0.00810435	-0.110017	-0.205159	-0.236796	-0.525295	-0.54881	-0.599909	0.310035	positive	1846
Cla97C04G070210	Cla97C04G070210.1	-0.150038	-0.150038	-0.130802	0.0500513	0.0444212	0.0486458	0.160874	0.156966	0.169952	-0.0684728	-0.0338164	-0.0977437	-0.0715993	-0.00834916	0.0182766	0.401446	0.622916	0.405403	0.326685	0.32083	0.331669	-0.79662	-0.740361	-0.810296	0.575585	positive	1847
Cla97C04G070270	Cla97C04G070270.1	-0.205443	-0.185474	-0.195424	-0.0113322	-0.00548537	0.0376263	0.186795	0.202035	0.243133	-0.0334711	0.0489084	-0.081868	-0.0122869	-0.0405267	-0.0899279	-0.140248	0.0379865	-0.0626581	0.0541724	0.0508849	-0.0372493	0.0701662	0.125059	0.044628	0.293645	positive	1848
Cla97C04G070280	Cla97C04G070280.1	0.393309	0.443897	0.575	-0.134596	-0.132984	-0.182171	-0.053031	-0.0948063	-0.150825	-0.172198	-0.205712	-0.285882	-0.108962	-0.0410108	-0.101055	-0.238633	-0.135118	-0.238887	0.017847	0.00741978	-0.0185664	0.275124	0.310612	0.27123	-0.346725	negative	1849
Cla97C04G070290	Cla97C04G070290.1	0.320688	0.323057	0.393502	-0.0200331	-0.0125464	-0.0442552	0.0673414	0.033024	0.0184805	-0.291801	-0.352886	-0.43457	0.372349	0.386382	0.472071	-0.132726	-0.0820252	-0.0649668	-0.165293	-0.0836004	-0.0710476	-0.240526	-0.203138	-0.18748	0.870633	positive	1850
Cla97C04G070300	Cla97C04G070300.1	-0.279473	-0.315363	-0.277702	-0.232396	-0.17852	-0.101301	0.17447	0.148357	0.153617	0.328929	0.356563	0.222819	-0.620794	-0.581165	-0.688964	0.0973223	0.0315459	0.0276472	0.304464	0.204401	0.250977	0.361038	0.273024	0.340504	0.839615	positive	1851
Cla97C04G070330	Cla97C04G070330.1	-0.0184943	0.270447	0.10211	0.262801	0.62082	0.394601	0.308085	0.189405	0.30188	-0.308174	-1.44758	-0.675905	-0.377905	-0.432674	-0.231217	-0.364476	-0.224117	-0.268236	0.146561	0.197749	0.10159	0.477942	0.48878	0.486003	-0.688312	negative	1853
Cla97C04G070380	Cla97C04G070380.1	0.225346	0.0151532	0.131406	-0.0228146	-0.100324	0.0266374	-0.0940921	-0.0376879	0.0380309	-0.0679025	0.0422804	-0.156033	0.274121	0.240103	0.281935	-0.0610256	-0.0854275	-0.049102	-0.0691468	-0.114785	-0.0872986	-0.0473004	-0.153463	-0.12861	0.715371	positive	1854
Cla97C04G070400	Cla97C04G070400.1	0.611996	0.467032	0.540813	0.0848952	0.268576	0.235468	0.0160778	0.0295122	-0.0219101	-0.726397	-0.74153	-0.764532	-0.119772	-0.205023	-0.304921	-0.304158	-0.475376	-0.531443	0.254419	0.0069895	0.132306	0.601676	0.516901	0.428401	-0.837156	negative	1855
Cla97C04G070410	Cla97C04G070410.1	0.103275	-0.208054	-0.0778464	-0.112498	0.170327	0.0472953	0.2344	0.438593	0.336023	-0.256552	-0.432435	-0.242528	-0.269138	-0.139898	-0.147598	-0.154487	-0.0822976	-0.135112	0.0334327	0.134693	0.114808	0.236086	0.211422	0.198088	-0.166341	negative	1856
Cla97C04G070460	Cla97C04G070460.1	0.283725	0.364357	0.38383	0.307912	0.344618	0.386104	-0.213703	-0.293332	-0.278851	-0.420683	-0.400947	-0.46303	-0.413755	-0.434267	-0.343454	-0.169243	-0.0704441	-0.151048	0.0190256	0.0800963	0.102585	0.471783	0.456675	0.452047	-0.895788	negative	1858
Cla97C04G070600	Cla97C04G070600.1	-0.227016	0.575676	0.102782	-0.249491	-0.239074	0.0385897	0.190165	-0.169838	0.066851	0.295427	-0.256477	-0.127594	-0.899702	-0.85005	-0.909474	-0.296169	-0.282609	-0.332525	0.467202	0.43716	0.434351	0.750777	0.718312	0.762727	-0.138545	negative	1861
Cla97C04G070610	Cla97C04G070610.1	0.0640209	0.0524793	0.134137	0.722745	0.362773	0.495489	-0.106623	-0.0233521	-0.196716	-0.80686	-0.221022	-0.47707	1.01202	0.945512	1.03365	0.249672	0.115711	0.232612	-0.300703	-0.187011	-0.296934	-0.967191	-0.914487	-0.922844	0.626485	positive	1862
Cla97C04G070650	Cla97C04G070650.1	0.595461	0.596461	0.688446	0.0788858	0.0367709	0.129512	-0.0878225	-0.125255	-0.155243	-0.549666	-0.441013	-0.766537	0.748632	0.681445	0.5692	-0.112706	-0.0514064	-0.157455	-0.390617	-0.461027	-0.302658	-0.0534145	-0.213019	-0.256974	0.780798	positive	1863
Cla97C04G070680	Cla97C04G070680.1	-0.570381	-0.388893	-0.467441	0.642133	0.495874	0.531524	0.167029	0.16436	0.168362	-0.295907	-0.222457	-0.224205	-0.332921	-0.290106	-0.387852	1.00793	0.963964	0.911629	-0.105883	-0.129845	-0.113866	-0.550346	-0.507288	-0.465418	0.881466	positive	1864
Cla97C04G070690	Cla97C04G070690.1	-0.280027	-0.273023	-0.144439	0.0731522	0.0299169	0.0482058	0.128414	0.163683	0.0717775	0.0758975	0.0936163	0.0128265	-0.541424	-0.559729	-0.432869	0.0939813	0.233928	0.183539	0.23472	0.281734	0.277039	0.0703447	0.102258	0.0564781	0.955911	positive	1865
Cla97C04G070720	Cla97C04G070720.1	-0.462361	-0.507578	-0.193605	-0.150586	-0.00201037	-0.0774823	0.291101	0.37503	0.203264	0.288699	0.10017	0.135359	-1.82713	-1.77239	-1.80371	0.206882	0.180935	0.18011	0.831062	0.802397	0.817918	0.753856	0.815547	0.814527	0.892616	positive	1866
Cla97C04G070750	Cla97C04G070750.1	0.132278	0.124307	0.158533	0.0519179	0.0264829	0.0193372	0.0264829	0.0236289	0.0406688	-0.199954	-0.22689	-0.176791	0.74477	0.741843	0.784737	-0.0292259	-0.0647759	-0.101276	-0.321715	-0.335043	-0.341435	-0.369581	-0.33253	-0.375767	0.729949	positive	1867
Cla97C04G070860	Cla97C04G070860.1	0.0682938	-0.0861681	-0.00541588	0.0248063	0.147605	-0.198061	-0.306767	-0.0497191	-0.087707	0.192673	0.0276518	0.272809	-0.259012	-0.339999	-0.248403	-0.137879	-0.0961121	-0.0891665	0.131076	0.110951	0.15968	0.245772	0.293202	0.229892	0.181334	positive	1869
Cla97C04G070880	Cla97C04G070880.1	-0.0591311	-0.0758803	-0.086641	0.319497	0.218214	0.184088	0.0303784	0.02753	0.0765822	-0.320653	-0.157802	-0.156182	-0.42164	-0.280084	-0.29803	0.303898	0.447326	0.362939	0.0423865	0.0137082	0.0524187	-0.0924824	-0.0878902	-0.0425493	0.729188	positive	1870
Cla97C04G070910	Cla97C04G070910.1	-0.310409	-0.208571	-0.178374	-0.0929633	-0.0543656	-0.107115	-0.0182588	-0.0242142	-0.0574157	0.336863	0.309896	0.404927	0.17689	0.0285502	0.118017	-0.0325412	-0.033504	-0.0297472	-0.110268	-0.0881305	-0.149839	0.0332438	0.0621516	0.0251782	-0.08686	negative	1871
Cla97C04G070940	Cla97C04G070940.1	-0.201065	-0.057949	-0.111931	-0.0161721	-0.0279854	-0.0443883	0.218146	0.0873777	0.176289	-0.0235441	-0.00883759	0.0100594	-0.121195	-0.0506789	-0.00127995	-0.146336	-0.0969565	-0.153551	0.0593739	0.0406257	0.156454	0.0751393	0.129033	0.109373	0.579429	positive	1872
Cla97C04G071030	Cla97C04G071030.1	0.244573	0.259408	0.305404	0.0103269	0.0620111	0.0620111	0.0205227	-0.0311923	-0.0432778	-0.230947	-0.351617	-0.307223	0.176385	0.333126	0.178894	-0.155706	-0.121549	-0.183598	-0.166208	-0.189143	-0.073181	0.152331	0.000394589	0.0482544	0.28776	positive	1873
Cla97C04G071060	Cla97C04G071060.1	0.143418	0.284617	0.218862	-0.0835761	-0.234044	-0.133599	0.0610333	-0.0352299	-0.0307794	-0.106808	-0.0352299	-0.0486643	0.0879935	0.167085	-0.0343859	0.258474	0.0808051	0.240123	-0.00117772	-0.00323466	-0.0169537	-0.240245	-0.255222	-0.283261	0.0953707	positive	1874
Cla97C04G071260	Cla97C04G071260.1	-0.795471	-0.82311	-1.10242	0.340289	0.252982	0.475753	0.64265	0.627415	0.874537	-0.0427144	0.0995077	-0.549418	-2.10758	-2.23295	-2.08506	0.246026	0.397237	0.23397	0.866066	0.800082	0.847205	1.02125	1.0142	0.99955	0.77063	positive	1877
Cla97C04G071400	Cla97C04G071400.1	0.39175	0.761137	0.673388	-0.306326	-0.70863	-0.335394	-0.383157	-0.78143	-0.651462	0.483381	0.502125	0.354618	0.0695491	0.0417482	0.0606271	0.074797	0.137239	0.0647002	-0.0598751	-0.0670299	-0.0767236	-0.0426773	-0.108313	-0.0940418	-0.047609	negative	1881
Cla97C04G071440	Cla97C04G071440.1	-0.138251	-0.122327	-0.0863557	0.043545	0.044956	0.00491826	0.161409	0.120507	0.152274	-0.0725205	-0.0940997	-0.0140552	-0.022586	0.0758673	-0.045222	0.3429	0.43241	0.334134	-0.0729042	-0.119698	-0.0486146	-0.219948	-0.32531	-0.33103	0.173447	positive	1882
Cla97C04G071470	Cla97C04G071470.1	0.192195	0.0428401	0.00617142	-0.102063	-0.0655755	0.0189702	-0.171452	-0.153789	-0.197535	0.182115	0.126694	0.121429	-0.944938	-0.863335	-0.893206	-0.192542	-0.14949	-0.195145	0.547343	0.550937	0.553967	0.519735	0.498785	0.567888	-0.273671	negative	1883
Cla97C04G071490	Cla97C04G071490.1	-0.238787	-0.280506	-0.189934	-0.0331357	-0.0525813	-0.00663647	-0.00663647	0.0603451	-0.00081327	0.275958	0.251771	0.220956	0.13312	0.12229	0.0799535	-0.0411176	-0.0231928	-0.0210964	-0.0223462	-0.0984605	0.0379862	-0.0464975	-0.0534388	-0.0672003	-0.825187	negative	1884
Cla97C04G071500	Cla97C04G071500.1	-0.454408	-0.182168	0.0040902	-0.458519	-0.199262	-0.183869	0.0467635	-0.165275	-0.244678	0.732968	0.59303	0.511327	-0.11187	-0.092609	-0.00859398	-0.0319184	-0.0824386	-0.12566	0.0490958	0.0136104	-0.0261317	0.0573795	0.168215	0.190921	0.812766	positive	1885
Cla97C04G071610	Cla97C04G071610.1	-0.255633	-0.321261	-0.241827	-0.0091661	0.101919	0.00248034	0.211346	0.184757	0.130064	0.0537562	0.0254949	0.118069	-1.193	-1.07918	-1.11043	0.245297	0.263462	0.282852	0.257687	0.305249	0.327133	0.700887	0.492384	0.507663	0.887793	positive	1888
Cla97C04G071620	Cla97C04G071620.1	-0.483765	-0.427575	-0.13789	-0.123471	-0.0888193	-0.106041	0.332043	0.33088	0.248281	0.20196	0.159354	0.0950449	-1.9985	-1.92808	-2.07532	-0.0993857	-0.137541	-0.0939794	0.73403	0.716625	0.698854	1.36687	1.41127	1.40516	0.848409	positive	1889
Cla97C04G071630	Cla97C04G071630.1	0.141201	0.170291	0.146787	-0.425684	-0.599501	-0.255759	-0.411247	-0.149239	-0.166455	0.380486	0.569124	0.599996	-0.280166	-0.275123	-0.291143	0.12428	0.103448	0.136339	0.115897	0.0674512	0.041554	0.0940471	0.0650279	0.0983876	-0.282378	negative	1890
Cla97C04G071650	Cla97C04G071650.1	-0.243555	-0.255627	-0.238411	0.235725	0.167613	0.194485	0.0492272	0.0631799	0.0534272	0.0180479	-0.000697983	-0.0434149	0.293082	0.295357	0.347099	0.425006	0.504817	0.450022	-0.180961	-0.16052	-0.16339	-0.579426	-0.613347	-0.617741	0.0389087	positive	1891
Cla97C04G071660	Cla97C04G071660.1	-0.480216	-0.411791	-0.363471	0.206844	0.153381	0.0867727	-0.047257	0.0685725	-0.0170424	0.318871	0.21832	0.267018	-0.170275	-0.219097	-0.181368	0.151095	0.12872	0.148683	0.0112949	-0.0430934	-0.00298094	0.0535581	0.0585784	0.0648846	0.882383	positive	1892
Cla97C04G071670	Cla97C04G071670.1	0.341343	0.320144	0.175504	-0.0543399	0.00885396	-0.0682492	0.0117952	0.0220427	0.0293181	-0.20327	-0.257128	-0.326013	0.16426	0.0558097	0.0609715	-0.436971	-0.582422	-0.555451	-0.140752	-0.00648155	0.0342632	0.418508	0.416971	0.571295	-0.276597	negative	1893
Cla97C04G071700	Cla97C04G071700.1	0.297207	0.307802	0.251593	0.0615592	0.0559836	-0.0392689	-0.268391	-0.232127	-0.210127	-0.134867	-0.114291	0.0249263	0.440979	0.390627	0.435929	-0.141774	-0.0611942	-0.0846565	-0.226774	-0.314938	-0.282374	0.000810162	-0.100332	-0.0563034	0.91214	positive	1894
Cla97C04G071730	Cla97C04G071730.1	0.356716	0.401822	0.455469	0.248173	0.168763	0.293066	-0.036556	0.0932119	-0.170669	-0.500237	-0.601598	-0.708162	-0.668507	-0.53155	-0.562338	-0.138981	-0.0609428	-0.0954061	0.218801	0.12531	0.154919	0.541703	0.516145	0.500848	-0.916196	negative	1895
Cla97C04G071770	Cla97C04G071770.1	-0.406272	-0.529831	-0.56906	0.12029	0.133926	0.195044	0.278445	0.299169	0.262395	0.0601399	0.0828154	0.0729387	-1.66837	-1.7469	-1.61743	0.558818	0.399511	0.49466	0.714777	0.821077	0.759862	0.36812	0.492509	0.42337	0.982343	positive	1896
Cla97C04G071780	Cla97C04G071780.1	0.245072	0.171912	0.285099	0.133893	0.135221	0.169322	-0.351003	-0.27849	-0.274958	-0.057614	-0.0187008	-0.159753	0.459458	0.470874	0.445259	0.10421	0.149413	0.103117	-0.298371	-0.305646	-0.268064	-0.255382	-0.26091	-0.343957	0.88831	positive	1897
Cla97C04G071790	Cla97C04G071790.1	-0.0604148	0.007316	0.0512306	0.124673	0.0554103	0.0938478	0.0512306	0.0554103	0.0442374	-0.115733	-0.112603	-0.194606	-0.564087	-0.596178	-0.434664	0.0443054	0.0720494	0.0521323	0.213882	0.244524	0.212354	0.205968	0.292224	0.25749	-0.142684	negative	1898
Cla97C04G071820	Cla97C04G071820.1	-0.290075	-0.251319	-0.225479	-0.162017	-0.147387	-0.0903059	0.179707	0.192543	0.124516	0.212845	0.236588	0.220385	-0.422914	-0.332492	-0.388416	-0.804427	-0.883026	-0.77651	0.100012	0.0606045	0.119857	1.06282	1.14216	1.12234	0.811913	positive	1899
Cla97C04G071870	Cla97C04G071870.1	0.282241	0.719291	0.27126	-0.10909	-0.133202	-0.123509	-0.0390799	-0.380117	-0.0105107	-0.074438	-0.374358	-0.0284884	1.06794	1.24611	1.18368	-0.886691	-0.602848	-0.458775	-0.363816	-0.292018	-0.485594	-0.149884	-0.0777484	-0.180349	0.786047	positive	1902
Cla97C04G071880	Cla97C04G071880.1	0.472882	0.365883	0.524069	0.265428	0.335161	0.289049	-0.133406	-0.107204	-0.150027	-0.672023	-0.592631	-0.597182	3.19442	3.17688	3.11772	0.215541	0.333233	0.274601	-1.10016	-1.18158	-1.20432	-2.22475	-2.31079	-2.29079	0.901235	positive	1903
Cla97C04G071900	Cla97C04G071900.1	-0.221505	-0.337843	-0.594182	-0.204412	0.161365	-0.126677	0.100767	-0.043768	0.0346345	0.38564	0.274202	0.571779	-1.19198	-1.24159	-1.25957	0.0516843	0.119801	0.0875768	0.447113	0.493276	0.54294	0.75661	0.57676	0.617371	0.820764	positive	1904
Cla97C04G071940	Cla97C04G071940.1	0.0141339	-0.0324087	0.071653	0.121662	0.199245	0.186601	0.0592218	0.0494785	0.0466826	-0.0668136	-0.331969	-0.317488	-0.149342	0.0195381	0.151293	-0.166876	-0.249845	-0.282169	-0.121825	-0.0954805	0.033338	0.305838	0.243545	0.311984	-0.821941	negative	1905
Cla97C04G071950	Cla97C04G071950.1	-0.62083	-0.56147	-0.530491	-0.40077	-0.363244	-0.267091	0.490158	0.517945	0.474972	0.469509	0.446337	0.344973	-0.843903	-0.788072	-0.669277	0.192405	0.139345	0.222448	0.385527	0.509683	0.479172	0.134015	0.116683	0.121974	0.75988	positive	1906
Cla97C04G071970	Cla97C04G071970.1	-0.310022	-0.171124	-0.296655	-0.419596	-0.141804	-0.390906	-0.304278	-0.238902	-0.421668	0.915108	0.821889	0.95796	-0.292099	-0.302287	-0.124429	-0.236344	-0.199257	-0.277286	0.0849297	0.081037	0.092946	0.392803	0.362253	0.417733	0.827608	positive	1907
Cla97C04G071990	Cla97C04G071990.1	0.0994577	0.0460438	0.0543911	0.241477	0.252402	0.0320233	-0.209753	-0.167077	-0.0868627	-0.19319	-0.0565847	-0.0123268	0.19425	0.132149	0.264156	0.49249	0.563767	0.545592	-0.0354151	-0.0334419	-0.0332627	-0.703934	-0.67396	-0.712389	0.651275	positive	1908
Cla97C04G072030	Cla97C04G072030.1	-0.0966266	-0.455121	-0.0871352	0.350197	0.655495	0.499403	0.191581	0.114156	0.161373	-0.234765	-0.459197	-0.639361	-1.30126	-1.24684	-1.26946	0.369191	0.407708	0.439649	0.353062	0.314354	0.347431	0.493077	0.549809	0.543292	0.253469	positive	1909
Cla97C04G072060	Cla97C04G072060.1	-0.0799301	-0.163565	-0.213147	0.27324	0.0264374	0.0809379	-0.273232	-0.0140011	0.0932279	0.057434	0.163552	0.0490462	-0.19708	-0.0619781	-0.147748	0.137961	0.0949318	0.0666854	0.0129546	0.0458652	0.0630157	-0.0479685	-0.0214038	0.0547645	0.58242	positive	1911
Cla97C04G072140	Cla97C04G072140.1	0.68694	0.602247	0.590438	-0.382156	-0.210508	-0.403645	-0.166427	-0.139955	-0.275656	-0.0868436	-0.198507	-0.0159276	0.690616	0.663436	0.575777	-0.0991252	-0.0403456	-0.0939888	-0.109459	-0.0845058	-0.0458863	-0.444913	-0.491425	-0.520181	0.803895	positive	1913
Cla97C04G072220	Cla97C04G072220.1	0.342618	0.343779	0.0837596	-0.128476	-0.251082	-0.106108	0.116737	0.0385835	0.301379	-0.308297	-0.219869	-0.213024	0.0853213	0.0539268	0.0135773	-0.203659	-0.180869	-0.241527	-0.0392437	-0.108407	-0.071278	0.224024	0.240773	0.227362	-0.121503	negative	1916
Cla97C04G072270	Cla97C04G072270.1	0.0210703	-0.0358568	0.00957467	-0.16017	-0.0181003	-0.0418245	0.0922773	0.0758361	0.0647703	-0.0020133	-0.0136951	0.00813125	-0.00090598	0.0795109	0.0211985	-0.112511	-0.295947	-0.236811	-0.0263896	-0.169388	-0.0439468	0.297285	0.246211	0.241693	0.0752657	positive	1917
Cla97C04G072300	Cla97C04G072300.1	0.254291	0.297324	0.188505	0.185963	-0.103261	-0.0187271	-0.0986043	-0.00704531	0.013173	-0.408573	-0.16358	-0.139468	0.938284	1.12672	0.991119	-0.365727	-0.301312	-0.509497	-0.437992	-0.498479	-0.438654	-0.0441606	-0.253758	-0.20654	0.610866	positive	1918
Cla97C04G072460	Cla97C04G072460.1	-0.466156	-0.423631	-0.466156	0.333546	0.298896	0.371989	-0.0933462	-0.0588454	-0.054204	0.158002	0.216789	0.183116	1.37357	1.29013	1.26057	-0.523808	-0.521714	-0.495648	-0.407084	-0.460164	-0.402553	-0.316296	-0.382287	-0.414724	-0.886592	negative	1919
Cla97C04G072510	Cla97C04G072510.1	0.257734	0.328123	0.462608	-0.0548966	-0.00779021	-0.0704263	-0.237427	-0.109998	-0.172306	-0.0657498	-0.185773	-0.144098	0.578246	0.584368	0.550791	-0.133923	-0.182882	-0.132087	-0.218567	-0.0858913	-0.188708	-0.227171	-0.255755	-0.288421	0.942315	positive	1921
Cla97C04G072520	Cla97C04G072520.1	0.212598	0.198684	0.315822	-0.0595287	0.0303466	0.065622	-0.0398999	-0.124834	-0.150511	-0.109015	-0.110589	-0.228694	0.49635	0.479024	0.437845	0.0399742	-0.0692565	-0.0176798	-0.116083	-0.179209	-0.152612	-0.332231	-0.29765	-0.288472	0.920382	positive	1922
Cla97C04G072540	Cla97C04G072540.1	0.159553	0.136009	0.133369	-0.012482	0.00927854	0.0462363	-0.0183406	0.0420199	0.069899	-0.179669	-0.207844	-0.178029	0.176516	0.273284	0.256227	-0.17269	-0.255758	-0.231777	-0.0758735	-0.217666	-0.179622	0.114756	0.157373	0.155232	-0.0439775	negative	1923
Cla97C04G072600	Cla97C04G072600.1	1.05058	1.0372	1.22935	-0.147226	-0.127597	-0.192856	-0.368122	-0.330916	-0.59681	-0.419272	-0.441131	-0.693194	0.231505	0.307347	0.22224	-0.0946634	-0.252916	-0.230445	-0.0370055	-0.154433	-0.152875	0.0557058	0.114931	-0.00939045	0.712397	positive	1925
Cla97C04G072670	Cla97C04G072670.1	0.216046	0.179977	0.378318	0.30844	0.419781	0.35193	-0.0302918	-0.0607939	-0.196449	-0.49653	-0.445329	-0.625097	0.146434	0.221558	0.20282	0.268722	0.378884	0.230581	-0.200138	-0.242232	-0.173581	-0.219801	-0.346256	-0.266991	0.903517	positive	1927
Cla97C04G072750	Cla97C04G072750.1	0.64268	0.705707	0.64268	0.0126068	0.023143	0.0171318	-0.172505	-0.214325	-0.233905	-0.45839	-0.555833	-0.408992	0.370462	0.348286	0.399964	-0.0879551	-0.0477033	-0.0950516	-0.0599569	-0.0255744	-0.0371084	-0.27268	-0.231214	-0.261468	0.958822	positive	1930
Cla97C04G072810	Cla97C04G072810.1	1.15418	1.10463	0.858757	0.262885	0.194206	0.224041	-0.537983	-0.441152	-0.257174	-1.18258	-0.936424	-0.443384	1.96285	2.01253	2.16325	0.477366	0.645603	0.623311	-0.755208	-0.451657	-0.46059	-2.12165	-2.09003	-2.00577	0.960986	positive	1932
Cla97C04G072880	Cla97C04G072880.1	-0.0555417	0.091829	-0.0274699	-0.0979324	-0.0615218	-0.0172638	0.197011	0.0714804	0.0480662	-0.0675267	-0.118045	0.0369149	0.615255	0.580917	0.657517	-0.0963963	-0.0143751	-0.111817	-0.218705	-0.261095	-0.237006	-0.266954	-0.329755	-0.317586	-0.037636	negative	1934
Cla97C04G072940	Cla97C04G072940.1	-0.26491	-0.331771	-0.257863	-0.079567	-0.0473181	-0.101474	-0.0842334	-0.0322112	-0.0764644	0.445682	0.430496	0.399635	0.0751889	0.0838144	0.0516438	-0.0861824	-0.170038	-0.210649	-0.000135171	0.0595587	-0.0204081	0.110872	0.0166551	0.0896796	0.213594	positive	1935
Cla97C04G073010	Cla97C04G073010.1	-0.190168	-0.188515	-0.25618	-0.0276154	-0.0574859	-0.0818358	0.0542718	0.130435	0.17093	0.169642	0.121132	0.155389	-1.53657	-1.52931	-1.39678	-0.174728	-0.161449	-0.300498	0.176825	0.19817	0.219702	1.48409	1.48813	1.53242	0.903618	positive	1936
Cla97C04G073080	Cla97C04G073080.1	-0.294821	-0.137279	-0.261906	0.264012	0.236121	0.343402	0.454301	0.349331	0.30852	-0.430476	-0.334195	-0.49701	-1.02653	-0.978372	-0.983536	0.377507	0.367081	0.399899	0.308286	0.266492	0.277224	0.33345	0.316781	0.341718	0.390469	positive	1937
Cla97C04G073140	Cla97C04G073140.1	0.235911	0.244797	0.290878	0.373068	0.281038	0.41078	-0.0442875	-0.0167192	-0.122118	-0.576865	-0.426205	-0.650277	1.15285	1.16903	1.16929	0.606588	0.62097	0.646591	-0.269487	-0.319435	-0.296968	-1.48536	-1.49779	-1.49628	0.942844	positive	1940
Cla97C04G073160	Cla97C04G073160.1	-0.0463091	-0.128329	0.256538	-0.28636	-0.134713	-0.426175	0.156828	0.177587	0.169837	0.184013	0.114393	-0.037311	0.178444	0.172898	0.282798	-0.147765	-0.0667036	-0.20555	-0.124122	-0.147934	-0.0958747	0.0683843	0.0394886	0.0459367	0.369255	positive	1941
Cla97C04G073190	Cla97C04G073190.1	0.235827	0.488168	0.287533	-0.172957	-0.196443	-0.0999553	0.223238	0.0685628	0.166502	-0.216883	-0.380176	-0.403415	-0.419528	-0.502284	-0.39362	0.111104	0.209614	0.130352	0.183816	0.159302	0.164591	0.110783	0.122366	0.123505	-0.683275	negative	1943
Cla97C04G073270	Cla97C04G073270.1	-0.154753	-0.241508	-0.217633	0.0711048	0.0683331	0.121444	0.0835122	0.167499	0.110708	-0.0321938	0.0160712	0.00741496	-0.135734	-0.10242	-0.125051	-0.041679	-0.0896236	-0.0789441	0.00717161	-0.0365584	-0.0348818	0.214831	0.191911	0.230978	0.212691	positive	1945
Cla97C04G073290	Cla97C04G073290.1	0.0930797	0.103806	0.0917333	0.025581	0.0754774	0.111799	-0.0556374	0.0754774	-0.0290296	-0.0903664	-0.257047	-0.144873	-0.701992	-0.687003	-0.644585	0.111877	0.0733349	0.162007	0.173429	0.256528	0.189052	0.31558	0.375295	0.376477	-0.635753	negative	1946
Cla97C04G073360	Cla97C04G073360.1	0.375089	0.361467	0.372827	0.0761364	0.010742	0.253762	-0.0592838	-0.0275749	-0.0141959	-0.412073	-0.379305	-0.557592	-0.46964	-0.448167	-0.638673	0.0678059	0.00183181	0.0936042	0.217603	0.238571	0.219818	0.272711	0.239498	0.205038	-0.779179	negative	1947
Cla97C04G073460	Cla97C04G073460.1	-0.227801	-0.343707	-0.336299	0.124643	0.176056	0.151237	0.0559304	0.15387	0.156498	0.0417862	0.0699372	-0.0221503	-0.1878	-0.104367	-0.219772	0.00156105	-0.0904163	-0.06338	-0.030305	0.0210168	-0.036732	0.18605	0.268675	0.255469	0.42328	positive	1948
Cla97C04G073550	Cla97C04G073550.1	0.409787	0.240287	0.499916	0.369534	0.35547	0.348386	-0.0128319	-0.094132	-0.0909188	-0.818288	-0.348507	-0.858702	-0.161805	-0.159121	-0.0851504	0.0541135	0.117579	0.0958524	0.0342825	0.0617291	0.0762572	-0.0427645	-0.00743107	0.0164582	-0.0859463	negative	1949
Cla97C04G073560	Cla97C04G073560.1	0.167313	0.135251	0.0302053	-0.17893	-0.200931	-0.145725	-0.321818	-0.297911	-0.41567	0.33665	0.44197	0.449595	-0.0760612	-0.0997566	0.00284317	-0.0067713	0.0164129	0.0168447	-0.118406	-0.194307	-0.175496	0.188942	0.214244	0.231512	0.821197	positive	1950
Cla97C04G073570	Cla97C04G073570.1	-0.0362111	-0.055677	0.300514	-0.0199427	0.0206584	-0.230132	0.220613	-0.0273147	0.0559684	-0.162012	0.0890718	-0.155536	0.0967067	0.293704	0.0395182	-0.0556758	-0.122044	-0.194749	-0.11272	-0.192491	-0.190605	0.15618	0.148379	0.133796	-0.0988814	negative	1951
Cla97C04G073680	Cla97C04G073680.1	-0.229929	-0.194555	0.263515	-0.0505612	-0.191231	0.0171005	0.138314	0.0469651	-0.173083	0.154081	0.320517	-0.101134	0.250981	0.171041	0.165902	-0.226925	-0.207151	-0.153136	-0.102873	-0.0175353	-0.0393497	0.0208692	0.0798486	0.0583284	0.0499649	positive	1954
Cla97C04G073730	Cla97C04G073730.1	-0.384464	-0.442763	-0.167036	-0.118711	-0.0507487	-0.05724	-0.140946	-0.220674	-0.257573	0.712212	0.608376	0.519567	-2.04831	-2.02661	-2.12352	0.348001	0.206476	0.308437	0.721157	0.712953	0.686909	1.05739	1.08137	1.07576	0.638082	positive	1955
Cla97C04G073770	Cla97C04G073770.1	0.328362	0.336464	0.222429	-0.02199	0.0571803	0.0374363	-0.0579468	-0.0609841	-0.0808836	-0.252544	-0.358791	-0.148732	-0.773228	-0.763945	-0.76282	0.445135	0.440334	0.43545	0.244954	0.205623	0.210067	0.0994043	0.089862	0.129163	-0.681772	negative	1956
Cla97C04G073890	Cla97C04G073890.1	0.601682	0.489074	0.147043	-0.499261	-0.531299	-0.237283	-0.348949	-0.387526	-0.0996198	0.180394	0.359957	0.325788	0.459224	0.464367	0.461166	-0.0757083	-0.0666594	-0.15503	-0.0884807	-0.187846	-0.159587	-0.2584	-0.211867	-0.181178	0.495369	positive	1957
Cla97C04G073900	Cla97C04G073900.1	0.0792747	0.0530055	0.024827	0.164398	0.168268	0.148816	0.0585758	0.0792747	0.0874719	-0.338963	-0.351836	-0.173112	0.552238	0.591441	0.693214	0.312563	0.293637	0.232932	-0.239366	-0.198179	-0.27921	-0.649681	-0.707161	-0.602427	0.726409	positive	1958
Cla97C04G073910	Cla97C04G073910.1	-0.433955	-0.870295	-0.832039	-0.162419	0.0308617	-0.0961527	0.334586	0.381853	0.352493	0.407205	0.376029	0.511833	-1.48142	-1.38821	-1.43673	0.315705	0.38795	0.302071	0.66598	0.654418	0.724771	0.434378	0.398654	0.422435	0.902079	positive	1959
Cla97C04G073920	Cla97C04G073920.1	0.381932	0.42604	0.436292	-0.546781	-0.434587	-0.322787	-0.219031	-0.322787	-0.21546	0.267927	0.326668	0.222576	1.04386	1.05441	1.08136	-0.129667	-0.0859705	-0.107501	-0.399568	-0.36475	-0.365276	-0.539969	-0.590501	-0.59643	0.468584	positive	1960
Cla97C04G073960	Cla97C04G073960.1	0.729054	0.677773	0.560159	-0.148931	-0.0607752	-0.0513045	-0.255458	-0.152302	-0.0232599	-0.434702	-0.491203	-0.349051	0.275238	0.280918	0.234452	-0.0126464	-0.0113506	0.00272618	-0.22805	-0.271269	-0.180981	-0.0295915	-0.0250448	-0.0344007	0.777965	positive	1961
Cla97C04G074110	Cla97C04G074110.1	0.597207	0.34295	0.667501	0.143641	0.239061	0.260699	-0.153497	-0.0448992	-0.328692	-0.658243	-0.361373	-0.704355	0.672107	0.698406	0.628632	0.430064	0.442774	0.410456	-0.199477	-0.22114	-0.178242	-0.86876	-1.0269	-0.787919	0.926375	positive	1964
Cla97C04G074180	Cla97C04G074180.1	-0.471576	-0.373559	-0.341052	-0.0142159	-0.0695337	-0.0217732	-0.138514	-0.183576	-0.096412	0.57426	0.595162	0.54079	-0.987037	-1.03838	-1.14505	0.227567	0.210341	0.170212	0.35763	0.365858	0.336575	0.535612	0.458543	0.508136	0.72723	positive	1965
Cla97C04G074320	Cla97C04G074320.1	-0.95947	-0.850077	-0.934433	0.855531	0.730979	0.780964	0.641191	0.569708	0.59142	-0.559506	-0.34225	-0.524057	-2.15359	-2.09125	-2.1769	0.818346	0.812233	0.823282	0.854919	0.792185	0.846254	0.491897	0.485098	0.497527	0.804098	positive	1967
Cla97C04G074340	Cla97C04G074340.1	-0.239017	-0.237263	-0.382853	0.0906131	0.0737557	0.0609821	0.166777	0.122383	0.15213	0.092009	-0.0702624	0.170746	-0.625351	-0.526435	-0.556791	0.151241	0.15956	0.151384	0.115457	0.165717	0.159052	0.240451	0.266572	0.299144	0.892701	positive	1968
Cla97C04G074410	Cla97C04G074410.1	0.0560615	-0.0259074	0.122985	0.0249738	0.0532628	-0.000969462	0.0406014	0.0206822	0.0658142	-0.0925284	-0.087887	-0.177089	0.212975	0.226531	0.258786	0.172533	0.182903	0.165508	-0.158076	-0.185544	-0.139097	-0.193419	-0.274922	-0.26818	0.612724	positive	1969
Cla97C04G074490	Cla97C04G074490.1	0.3559	0.300182	0.242225	-0.10895	-0.139123	-0.140729	-0.0595169	0.0331178	0.058528	-0.143946	-0.245668	-0.152019	0.0649614	0.292359	0.236522	-0.529419	-0.547125	-0.650901	-0.110347	-0.123346	-0.164572	0.472689	0.534104	0.525075	0.114948	positive	1970
Cla97C04G074550	Cla97C04G074550.1	-0.0461827	-0.142606	-0.0267572	-0.0371846	-0.0297288	0.0199739	0.0928244	0.129248	0.111825	0.0582589	0.0113263	-0.140998	-0.224021	-0.195047	-0.251399	0.82141	0.770772	0.678732	-0.201279	-0.233342	-0.14843	-0.332202	-0.331562	-0.353632	-0.0746089	negative	1971
Cla97C04G074560	Cla97C04G074560.1	-0.666504	-0.77193	-0.860533	-0.195675	-0.227461	-0.178314	0.422666	0.324999	0.416966	0.571708	0.616165	0.547913	-4.15254	-3.93844	-4.06658	1.15109	1.16625	1.1947	1.33681	1.29141	1.34528	1.58279	1.51655	1.57267	0.862341	positive	1972
Cla97C04G074640	Cla97C04G074640.1	0.492021	0.251961	0.272755	0.051374	-0.0635134	0.197987	-0.161845	-0.211944	-0.11979	-0.453724	0.0808035	-0.336085	0.355247	0.384921	0.396473	-0.280254	-0.250969	-0.138869	0.123263	0.0142138	0.0721815	-0.295355	-0.170104	-0.210747	0.638231	positive	1973
Cla97C04G074680	Cla97C04G074680.1	-0.180311	-0.178676	-0.0701281	0.0739732	0.0546449	-0.061064	0.113205	0.182259	0.0629602	-0.0209659	-0.0416184	0.0657213	-0.823492	-0.840852	-1.00666	0.0581091	0.0503982	0.0721849	0.456808	0.41391	0.370452	0.429971	0.387151	0.432021	0.761996	positive	1974
Cla97C04G074710	Cla97C04G074710.1	-0.422379	-0.0108041	-0.0606875	-0.187617	-0.0917813	-0.109173	-0.0668529	-0.0823826	-0.0227396	0.524275	0.301883	0.22826	-0.356894	-0.332532	-0.353205	-0.0733675	-0.0624863	-0.0305479	0.142468	0.0545587	0.124639	0.299636	0.273116	0.314615	0.734509	positive	1975
Cla97C04G074740	Cla97C04G074740.1	0.15991	0.175354	0.119232	-0.0802744	-0.00581546	0.0100623	-0.12529	-0.236699	-0.126867	0.0718815	0.00142337	0.0370825	0.328304	0.332129	0.38389	-0.0545287	0.0110502	-0.130789	-0.147822	-0.142292	-0.200792	-0.112129	-0.140598	-0.126424	0.753533	positive	1976
Cla97C04G074760	Cla97C04G074760.1	-0.0612877	-0.0858187	-0.0193372	0.00409798	0.00118931	-0.0371668	0.134584	0.126599	0.105086	-0.0796467	-0.0178613	-0.070438	-0.403221	-0.372002	-0.339611	-0.0387653	0.0111247	-0.0487305	0.1931	0.20197	0.202787	0.183106	0.199526	0.210717	0.489389	positive	1977
Cla97C04G075000	Cla97C04G075000.1	0.000293893	-0.0265339	0.0105936	0.2981	0.22795	0.317193	-0.360168	-0.275496	-0.268363	0.0581831	0.0120591	0.00618847	2.23773	2.19535	2.18137	0.508526	0.479557	0.510392	-0.997115	-0.93521	-0.956767	-1.70769	-1.74787	-1.76827	0.299502	positive	1981
Cla97C04G075100	Cla97C04G075100.1	-0.153395	-0.016915	0.0874897	0.14224	0.148777	-0.0271938	0.0915671	0.010621	0.0530562	-0.0630019	-0.143777	-0.129469	0.7674	0.827625	0.694843	-0.763419	-0.576988	-0.833334	-0.0928821	-0.246737	-0.185558	0.20319	0.135541	0.0703185	-0.454737	negative	1983
Cla97C04G075110	Cla97C04G075110.1	1.07492	0.822329	1.03876	-0.0479222	0.077195	-0.00714237	-0.298437	-0.018445	-0.280831	-0.859005	-0.673999	-0.827422	0.527961	0.582153	0.450363	-0.124765	0.0226228	-0.107263	-0.277712	-0.313576	-0.24201	-0.230732	-0.25651	-0.0305322	0.849667	positive	1984
Cla97C04G075130	Cla97C04G075130.1	-0.0967063	-0.0674041	-0.0920398	0.0470158	0.0271358	0.0596526	0.153024	0.118546	0.103708	-0.0889373	-0.0750577	-0.0889373	-0.024139	0.0671312	0.042723	-0.25167	-0.243845	-0.243662	-0.0618338	-0.0362226	-0.0641422	0.257444	0.289884	0.268333	-0.628839	negative	1985
Cla97C04G075140	Cla97C04G075140.1	0.231	0.239702	0.327456	0.0420904	0.0548264	0.0148283	-0.00706431	-0.0337816	-0.057953	-0.390585	-0.12819	-0.292329	0.144688	0.181326	0.136651	0.170248	0.172313	0.236561	-0.0890086	-0.121346	-0.108525	-0.26062	-0.200524	-0.261764	0.814374	positive	1986
Cla97C04G075180	Cla97C04G075180.1	0.11309	0.103665	0.0914559	-0.0516439	-0.0622132	-0.111541	0.0694925	0.0541963	0.096895	-0.103721	-0.0943936	-0.105282	-0.385825	-0.458308	-0.408049	-0.0472657	-0.0555096	-0.00703724	0.182616	0.185666	0.187401	0.266289	0.26165	0.278374	-0.560583	negative	1987
Cla97C04G075210	Cla97C04G075210.1	0.149095	0.111725	0.0775197	-0.196076	-0.0452447	-0.127441	-0.321911	-0.412344	-0.189397	0.379933	0.306228	0.267913	-0.322621	-0.45393	-0.363397	0.04661	-0.113443	-0.0566587	0.251289	0.227794	0.150782	0.248704	0.209	0.175871	-0.167476	negative	1989
Cla97C04G075250	Cla97C04G075250.1	0.0439843	-0.0433903	-0.0615186	-0.0299419	-0.0284554	-0.0210455	0.00966681	0.0994261	0.00966681	0.000958365	0.0240651	-0.00341565	-0.031675	-0.108264	-0.0296652	0.0948318	0.260768	0.138501	0.010264	-0.0542412	0.0668521	-0.0594088	-0.144047	-0.143916	-0.273187	negative	1990
Cla97C04G075290	Cla97C04G075290.1	0.0124705	0.0812836	-0.202748	0.221029	-0.0857301	0.109799	-0.255463	-0.0996544	0.23589	0.0153444	0.124514	-0.156735	-0.723205	-0.726853	-0.603495	-0.0713202	-0.0732454	-0.0908156	0.280608	0.257481	0.297121	0.487285	0.465819	0.500621	-0.0065919	negative	1991
Cla97C04G075350	Cla97C04G075350.1	0.460182	0.277173	0.464473	-0.0499473	0.103738	-0.0560799	-0.110882	-0.0622387	-0.0981712	-0.246313	-0.47368	-0.208254	-0.0208166	0.13564	0.0163751	-0.338597	-0.26551	-0.289051	-0.117823	-0.125486	-0.131584	0.383905	0.346499	0.406447	-0.327485	negative	1992
Cla97C04G075390	Cla97C04G075390.1	0.320551	0.362615	0.136071	0.49386	0.370883	0.320551	-0.0437622	0.065058	0.0852965	-0.748132	-0.730336	-0.632655	0.320304	0.262377	0.248954	0.00303268	-0.0466198	-0.00753005	-0.141446	-0.117971	-0.132541	-0.0845882	-0.0954583	-0.208512	0.527766	positive	1993
Cla97C04G075480	Cla97C04G075480.1	0.710377	0.681344	0.846531	-0.446166	-0.50308	-0.475397	0.195539	0.0181427	0.110971	-0.37558	-0.2767	-0.485982	0.555223	0.571457	0.59687	-0.332126	-0.239042	-0.325512	-0.0995682	-0.103559	-0.130087	-0.136975	-0.187977	-0.168704	0.93428	positive	1996
Cla97C04G075530	Cla97C04G075530.1	0.616659	0.821074	0.682116	-0.140137	-0.270669	-0.158559	-0.000668703	-0.36475	-0.107235	-0.455011	-0.294546	-0.328273	1.50012	1.43728	1.32523	0.132978	-0.0296778	0.0863371	-0.482705	-0.429444	-0.467159	-1.02399	-1.0327	-1.01628	0.924687	positive	1997
Cla97C04G075600	Cla97C04G075600.1	-0.313483	-0.288108	-0.224838	0.0211881	0.0240851	-0.138083	0.0527393	-0.0125521	0.13007	0.299845	0.280593	0.168544	0.153239	0.0811033	0.0713991	0.531579	0.509129	0.460375	-0.145021	-0.207954	-0.184233	-0.414416	-0.467341	-0.387861	-0.583361	negative	1999
Cla97C04G075680	Cla97C04G075680.1	0.907525	0.986435	1.11754	0.141213	0.0889089	0.236339	-0.243328	-0.309986	-0.542446	-0.587946	-0.652629	-1.14162	2.38223	2.42218	2.57559	0.128077	0.163884	0.122625	-0.901049	-0.878016	-0.874939	-1.71361	-1.69536	-1.73162	0.973417	positive	2002
Cla97C04G075730	Cla97C04G075730.1	0.476235	0.601766	0.449106	0.126356	0.0719084	0.0417163	0.0972937	0.0256456	0.0460683	-0.872274	-0.721641	-0.342181	0.940197	1.08717	1.02988	-0.223568	-0.248458	-0.205242	-0.293098	-0.322239	-0.307755	-0.512297	-0.453762	-0.490833	0.77872	positive	2003
[truncated: 2,825 more rows]
